# Supplementary material for: α-C–H difluoroalkylation of alkyl sulfoxides via intermolecular Pummerer reaction
Source: Royal Society of Chemistry journal article supplement (doi:10.1039/d0qo01513j), 2021-01-01

## Supporting Information

### $\alpha$ -C-H Difluoroalkylation of Alkyl Sulfoxides via Intermolecular Pummerer Reaction

Xin Huang,<sup>1</sup> Weizhao Zhao,<sup>1</sup> Yuchen Liang,<sup>2</sup> Minghui Wang,<sup>1</sup> Yaling Zhan,<sup>1</sup> Yage Zhang,<sup>1</sup>  
Lichun Kong,<sup>1</sup> Zhi-Xiang Wang<sup>2,\*</sup> and Bo Peng<sup>1,\*</sup>

<sup>1</sup>Key Laboratory of the Ministry of Education for Advanced Catalysis Materials, Zhejiang Normal University, Jinhua 321004, China

<sup>2</sup> School of Chemical Sciences, University of the Chinese Academy of Sciences, Beijing 100049, China

[\*pengbo@zjnu.cn\*](mailto:pengbo@zjnu.cn)

[\*zxwang@ucas.ac.cn\*](mailto:zxwang@ucas.ac.cn)

### Table of Contents

#### Contents

|                                                                                                    |    |
|----------------------------------------------------------------------------------------------------|----|
| 1 General information .....                                                                        | 2  |
| 2 General procedure for the synthesis of starting sulfoxides <b>1</b> .....                        | 2  |
| 3 Studies on the influence of reaction parameters.....                                             | 10 |
| 4 General procedure for reaction of alkyl sulfoxide <b>1</b> with enol silyl ethers <b>2</b> ..... | 11 |
| 5 NMR analysis.....                                                                                | 36 |
| 6 Density functional theory (DFT) calculations.....                                                | 41 |
| 7 KIE studies and control experiments .....                                                        | 72 |
| 8 NMR spectra .....                                                                                | 76 |

## 1 General information

Unless otherwise indicated, all glassware was oven dried before use and all reactions were performed under an atmosphere of Nitrogen. All solvents were distilled from appropriate drying agents prior to use. All reagents were used as received from commercial suppliers. Reaction progress was monitored by thin layer chromatography (TLC) performed on plastic plates coated with silica gel GF254 with 0.2 mm thickness. Chromatograms were visualized by fluorescence quenching with UV light at 254 nm or by staining using potassium permanganate. Compound isolation was performed on chromatography column using silica gel 60 (160-200 mesh) or Biotage Isolera Prime flash column system. Neat infrared spectra were recorded using a NEXUS670 FT-IR spectrometer. Wavelengths ( $\nu$ ) are reported in  $\text{cm}^{-1}$ . MS (EI) analysis was performed on Agilent GC-MS instrument. High-resolution mass spectrometry (HRMS) analysis was carried out using a TOF MS instrument with ESI or APCI source. All  $^1\text{H}$ ,  $^{13}\text{C}$  and  $^{19}\text{F}$  NMR spectra were recorded on Bruker AV-400 or AV-600. Chemical shifts were reported in parts per million (ppm), and the residual solvent peak was used as an internal reference: proton (chloroform  $\delta$  7.26, methanol  $\delta$  3.31), carbon (chloroform  $\delta$  77.16, methanol  $\delta$  49.00). Multiplicity was indicated as follows: s (singlet), d (doublet), t (triplet), q (quartet), m (multiplet), dd (doublet of doublet). Coupling constants were reported in Hertz (Hz).

## 2 General procedure for the synthesis of starting sulfoxides 1

Sulfoxides **1a**, **1d**, **1w**, **1a'**, **1c'**, and enol silyl ether **2b** are commercially available. Sulfoxides **1b**,<sup>1</sup> **1i**,<sup>2</sup> **1j**,<sup>3</sup> **1k**,<sup>4</sup> **1m**,<sup>5</sup> **1r**,<sup>6</sup> **1t**,<sup>7</sup> **1z**,<sup>8</sup> **1b'**,<sup>9</sup> **1d'**,<sup>10</sup> **1h'**,<sup>11</sup> **1i'**,<sup>12</sup> **1j'**,<sup>13</sup> **1k'**,<sup>14</sup> **1l'**,<sup>15</sup> **1e'-1g'**,<sup>16</sup> and enol silyl ether **2a**,<sup>17</sup> **2c**,<sup>18</sup> **2d**,<sup>19</sup> **2e**<sup>20</sup> are known compounds.

References:

1. Firouzabadi, H.; Iranpoor, N.; Jafari, A. A.; Riazymontazer, E. *Adv. Synth. Catal.* **2006**, *348*, 434.
2. Laudadio, G.; Straathof, N. J. W.; Lanting, M. D. Knoops, B. Hessel, V.; Nođ, T. *Green Chem.* **2017**, *19*, 4061.
3. Yu, H.; Li, Z.; Bolm, C. *Org. Lett.* **2018**, *20*, 2076
4. Jia, T.-Z.; Bellomo, A.; Baina, K. E.; Dreher, S. D.; Walsh, P. J. *J. Am. Chem. Soc.* **2013**, *135*, 3740.
5. Rioz-Martinez, A.; Kopacz, M.; de Gonzalo, G.; Pazmiño, D. E.; Gotor, V.; Fraaije, M. W. *Org. Biomol. Chem.* **2011**, *9*, 1337.
6. Boral, S.; Wang, S.-M.; Wurster, J. A. *U.S. Pat. Appl.* 20120196902, 2012.

7. Choudary, B. M.; Bharathi, B. Reddy, C. V. *J. Chem. Soc. Perkin Trans.* **2002**, *1*, 2069.
8. Imada, Y.; Tonomura, I.; Komiya, N.; Naota, T. *Synlett* **2013**, *24*, 1679.
9. Rani Gogoi, S.; Jyoti Boruah, J.; Sengupta, G.; Saikia, G.; Ahmed, K.; Bania, K. K.; Islam, N. S. *Catal. Sci. Technol.* **2015**, *5*, 595.
10. Cui, H.; Wei, W.; Yang, D.; Zhang, Y.; Zhao, H.; Wang, L.; Wang, H. *Green Chem.* **2017**, *19*, 3520.
11. Ghorbani-Choghamarani, A.; Tahmasbi, B.; Arghand, F.; Faryadi, S. *RSC Adv.* **2015**, *5*, 92174.
12. Javorskis, T.; Bagdziunas, G.; Orentas, E. *Chem. Commun.* **2016**, *52*, 4325.
13. Colas, K.; Mart'n-Montero, R.; Mendoza, A. *Angew. Chem. Int. Ed.* **2017**, *56*, 16042.
14. Hashmat Ali, M.; Bohnert, G. *J. Synthesis* **1998**, *9*, 1238.
15. Johnson, J. A.; Zhang, X.; Reeson, T. C.; Chen, Y.-S.; Zhang, J. *J. Am. Chem. Soc.* **2014**, *45*, 15881.
16. Singh, S. P.; O'Donnell, J. S.; Schwan, A. L. *Org. Biomol. Chem.* **2010**, *8*, 1712.
17. Wu, Y.-B.; Lu, G.-P.; Zhou, B.-J.; Bu, M.-J.; Wan, L.; Cai, C. *Chem. Commun.* **2016**, *52*, 5965.
18. Surya Prakash, G. K.; Hu, J.; Olah, G. A. *J. Fluorine Chem.* **2001**, *112*, 357.
19. Yu, J.-S.; Liu, Y.-L.; Tang, J.; Wang, X.; Zhou, J. *Angew. Chem. Int. Ed.* **2014**, *53*, 9512.
20. Liao, F.-M.; Cao, Z.-Y.; Yu, J.-S.; Zhou, J. *Angew. Chem. Int. Ed.* **2017**, *56*, 2459.

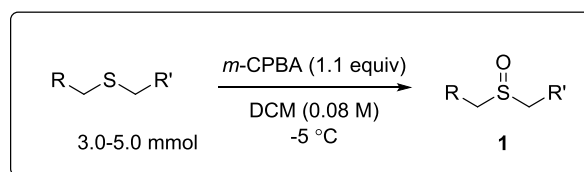

To a solution of sulfide (3.0-5.0 mmol) in DCM (0.08 M) was added a solution of *m*-CPBA (1.1 equiv.) in DCM (0.5 M) at -5 °C. After the starting sulfide completely consumed, the reaction was quenched with sat. aq. NaHCO<sub>3</sub>. The organic layer was separated, and the aqueous layer was extracted with CH<sub>2</sub>Cl<sub>2</sub>. The combined organic layers were washed with brine, dried over Na<sub>2</sub>SO<sub>4</sub>, filtrated and concentrated in vacuo. The obtained residue was purified by column chromatography on silica gel to afford the corresponding sulfoxides **1**.

#### 1-((butylsulfinyl)methyl)-4-methylbenzene (**1c**):

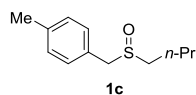

Following the general procedure, the title compound was prepared from corresponding sulfide (970 mg, 5.0 mmol) and it was obtained as white solid, m.p. 60 – 61 °C, 703 mg, 67% yield.

<sup>1</sup>H NMR (600 MHz, CDCl<sub>3</sub>): δ 7.17 (s, 4H), 4.00 (d, *J* = 12.9 Hz, 1H), 3.95 (d, *J* = 12.9 Hz, 1H), 2.56 (t, *J* = 7.7 Hz, 2H), 2.32 (s, 3H), 1.77 – 1.68 (m, 2H), 1.49 – 1.37 (m, 2H), 0.92 (t, *J* = 7.4 Hz, 3H).

<sup>13</sup>C NMR (151 MHz, CDCl<sub>3</sub>): δ 138.2, 129.9, 129.6, 126.7, 57.9, 50.5, 24.4, 22.0, 21.2, 13.7.

**IR (neat):** 2958, 2869, 2357, 2038, 1513, 1022, 823, 730.

**HRMS (ESI-TOF):** calculated for C<sub>12</sub>H<sub>18</sub>OSNa([M+Na]<sup>+</sup>): 233.0971; found: 233.1000.

**1-((butylsulfinyl)methyl)-3-methylbenzene (1e):**

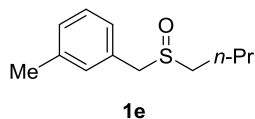

Following the general procedure, the title compound was prepared from corresponding sulfide (970 mg, 5.0 mmol) and it was obtained as colorless oil, 715 mg, 68% yield.

**<sup>1</sup>H NMR (600 MHz, CDCl<sub>3</sub>):** δ 7.29 – 7.26 (m, 1H), 7.16 (d, *J* = 7.6 Hz, 1H), 7.14 – 7.07 (m, 2H), 4.01 (d, *J* = 12.9 Hz, 1H), 3.96 (d, *J* = 12.8 Hz, 1H), 2.60 (t, *J* = 7.8 Hz, 2H), 2.37 (s, 3H), 1.85 – 1.66 (m, 2H), 1.55 – 1.34 (m, 2H), 0.94 (t, *J* = 7.4 Hz, 3H).

**<sup>13</sup>C NMR (151 MHz, CDCl<sub>3</sub>):** δ 138.7, 130.7, 129.8, 129.1, 128.8, 127.0, 58.3, 50.6, 24.4, 22.0, 21.4, 13.7.

**IR (neat):** 2956, 2927, 1607, 1463, 1028, 790, 702, 437.

**HRMS (ESI-TOF):** calculated for C<sub>12</sub>H<sub>18</sub>OSNa([M+Na]<sup>+</sup>): 233.0971; found: 233.0983.

**3-((butylsulfinyl)methyl)benzonitrile (1f):**

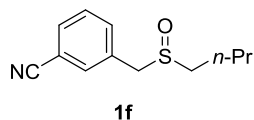

Following the general procedure, the title compound was prepared from corresponding sulfide (1.02 g, 5.0 mmol) and it was obtained as yellow oil, 940 mg, 85% yield.

**<sup>1</sup>H NMR (600 MHz, CDCl<sub>3</sub>):** δ 7.66 (d, *J* = 7.7 Hz, 1H), 7.61 (s, 1H), 7.58 (d, *J* = 7.9 Hz, 1H), 7.53 – 7.50 (m, 1H), 4.00 (d, *J* = 13.1 Hz, 1H), 3.94 (d, *J* = 13.1 Hz, 1H), 2.67 – 2.60 (m, 2H), 1.79 – 1.70 (m, 2H), 1.57 – 1.37 (m, 2H), 0.96 (t, *J* = 7.4 Hz, 3H).

**<sup>13</sup>C NMR (151 MHz, CDCl<sub>3</sub>):** δ 134.6, 133.4, 132.0, 131.9, 129.7, 118.3, 113.1, 56.8, 51.3, 24.6, 22.0, 13.7.

**IR (neat):** 2958, 2230, 1481, 1096, 1023, 780

**HRMS (ESI-TOF):** calculated for C<sub>12</sub>H<sub>15</sub>NOSNa([M+Na]<sup>+</sup>): 244.0767; found: 244.0771.

**1-((butylsulfinyl)methyl)-2-methylbenzene (1g):**

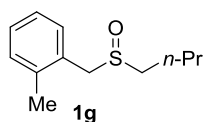

Following the general procedure, the title compound was prepared from

corresponding sulfide (970 mg, 5.0 mmol) and it was obtained as white solid, m.p. 37 – 38 °C, 547 mg, 52% yield.

**<sup>1</sup>H NMR (600 MHz, CDCl<sub>3</sub>):** δ 7.30 – 7.10 (m, 4H), 4.03 (d, *J* = 12.8 Hz, 2H), 3.94 (d, *J* = 12.9 Hz, 1H), 2.67 – 2.59 (m, 2H), 2.39 (s, 3H), 1.80 – 1.66 (m, 2H), 1.48 – 1.34 (m, 2H), 0.91 (t, *J* = 7.4 Hz, 3H).

**<sup>13</sup>C NMR (151 MHz, CDCl<sub>3</sub>):** δ 137.3, 131.0, 130.8, 128.8, 128.5, 126.5, 57.0, 51.1, 24.5, 22.0, 19.8, 13.7.

**IR (neat):** 2957, 2871, 1457, 1077, 768, 743, 726, 447.

**HRMS (ESI-TOF):** calculated for C<sub>12</sub>H<sub>18</sub>OSNa([M+Na]<sup>+</sup>): 233.0971; found: 233.0987.

#### 2-((butylsulfinyl)methyl)benzonitrile (**1h**):

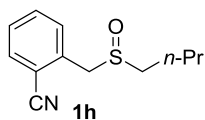

Following the general procedure, the title compound was prepared from corresponding sulfide (615 mg, 3.0 mmol) and it was obtained as white solid, m.p. 63 – 64 °C, 530 mg, 80% yield.

**<sup>1</sup>H NMR (600 MHz, CDCl<sub>3</sub>):** δ 7.67 (dd, *J* = 7.8, 1.0 Hz, 1H), 7.59 – 7.56 (m, 1H), 7.49 (d, *J* = 7.6 Hz, 1H), 7.43 – 7.40 (m, 1H), 4.20 (d, *J* = 13.2 Hz, 1H), 4.00 (d, *J* = 13.2 Hz, 1H), 2.76 – 2.60 (m, 2H), 1.77 – 1.68 (m, 2H), 1.54 – 1.34 (m, 2H), 0.90 (t, *J* = 7.4 Hz, 3H).

**<sup>13</sup>C NMR (151 MHz, CDCl<sub>3</sub>):** δ 134.2, 133.1, 133.1, 131.7, 128.8, 117.5, 113.3, 55.9, 51.7, 24.5, 21.9, 13.6.

**IR (neat):** 2958, 2857, 2225, 1595, 1464, 1023, 917, 771.

**HRMS (ESI-TOF):** calculated for C<sub>12</sub>H<sub>15</sub>NOSNa([M+Na]<sup>+</sup>): 244.0767; found: 244.0775.

#### methyl(naphthalen-2-ylmethyl)sulfane (**1l**):

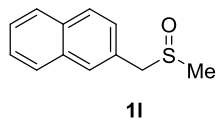

Following the general procedure, the title compound was prepared from corresponding sulfide (940 mg, 5.0 mmol) and it was obtained as white solid, m.p. 130 – 131 °C, 705 mg, 69% yield.

**<sup>1</sup>H NMR (600 MHz, CDCl<sub>3</sub>):** δ 7.93 – 7.83 (m, 3H), 7.80 (s, 1H), 7.59 – 7.48 (m, 2H), 7.41 (dd, *J* = 8.4, 1.7 Hz, 1H), 4.23 (d, *J* = 12.9 Hz, 1H), 4.08 (d, *J* = 12.9 Hz, 1H), 2.52 (s, 3H).

**<sup>13</sup>C NMR (151 MHz, CDCl<sub>3</sub>):** δ 133.3, 133.0, 129.4, 128.9, 127.9, 127.8, 127.4, 127.1, 126.6, 126.5, 60.5, 37.3.

**IR (neat):** 3055, 2904, 2268, 1980, 1597, 1025, 817, 749.

**HRMS (ESI-TOF):** calculated for  $C_{12}H_{12}OSNa([M+Na]^+)$ : 227.0501; found: 227.0496.

**allyl(hexyl)sulfane (1n):**

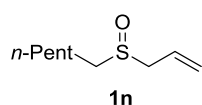

Following the general procedure, the title compound was prepared from corresponding sulfide (790 mg, 5.0 mmol) and it was obtained as colorless oil, 253 mg, 29% yield.

**$^1H$  NMR (600 MHz,  $CDCl_3$ ):**  $\delta$  5.93 – 5.85 (m, 1H), 5.49 – 5.33 (m, 2H), 3.52 – 3.40 (m, 2H), 2.74 – 2.63 (m, 2H), 1.85 – 1.67 (m, 2H), 1.53 – 1.36 (m, 2H), 1.36 – 1.25 (m, 4H), 0.95 – 0.81 (m, 3H).

**$^{13}C$  NMR (151 MHz,  $CDCl_3$ ):**  $\delta$  125.8, 123.5, 100.0, 55.7, 50.9, 31.4, 28.5, 22.5, 14.0.

**IR (neat):** 2952, 2922, 1638, 1466, 1074, 988, 921, 579.

**HRMS (ESI-TOF):** calculated for  $C_9H_{18}OSNa([M+Na]^+)$ : 197.0971; found: 197.0965.

**hexyl(3-methylbut-2-en-1-yl)sulfane (1o):**

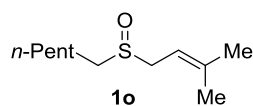

Following the general procedure, the title compound was prepared from corresponding sulfide (744 mg, 4.0 mmol) and it was obtained as colorless oil, 428 mg, 53% yield.

**$^1H$  NMR (600 MHz,  $CDCl_3$ ):**  $\delta$  5.26 – 5.16 (m, 1H), 3.50 – 3.38 (m, 2H), 2.65 – 2.61 (m, 2H), 1.79 (s, 3H), 1.77 – 1.72 (m, 2H), 1.71 (s, 3H), 1.49 – 1.35 (m, 2H), 1.30 – 1.27 (m, 4H), 0.90 – 0.85 (m, 3H).

**$^{13}C$  NMR (151 MHz,  $CDCl_3$ ):**  $\delta$  141.6, 111.3, 51.4, 50.9, 31.4, 28.6, 26.0, 22.5, 22.4, 18.6, 14.0.

**IR (neat):** 2925, 2857, 1451, 1376, 1083, 842, 724

**HRMS (ESI-TOF):** calculated for  $C_{11}H_{22}OSNa([M+Na]^+)$ : 225.1284; found: 225.1279.

**hexyl(prop-2-yn-1-yl)sulfane (1p):**

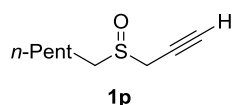

Following the general procedure, the title compound was prepared from corresponding sulfide (460 mg, 3.0 mmol) and it was obtained as colorless oil, 248 mg, 48% yield.

**$^1H$  NMR (600 MHz,  $CDCl_3$ ):**  $\delta$  3.61 – 3.52 (m, 2H), 2.95 – 2.82 (m, 2H), 2.43 (t,  $J = 2.7$  Hz, 1H),

1.87 – 1.70 (m, 2H), 1.54 – 1.40 (m, 2H), 1.38 – 1.28 (m, 4H), 0.90 – 0.87 (m, 3H).

<sup>13</sup>C NMR (151 MHz, CDCl<sub>3</sub>): δ 76.3, 72.6, 51.5, 41.8, 31.3, 28.5, 22.4, 22.1, 14.0.

IR (neat): 3212, 2927, 2857, 1458, 1403, 1086, 722, 635,

HRMS (ESI-TOF): calculated for C<sub>9</sub>H<sub>16</sub>OSNa<sup>+</sup>([M+Na]<sup>+</sup>): 195.0814; found: 195.0811.

**butyl(3-phenylprop-2-yn-1-yl)sulfane (1q):**

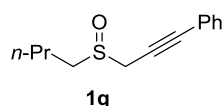

Following the general procedure, the title compound was prepared from corresponding sulfide (1.02 g, 5.0 mmol) and it was obtained as colorless oil, 364 mg, 33% yield.

<sup>1</sup>H NMR (600 MHz, CDCl<sub>3</sub>): δ 7.47 – 7.42 (m, 2H), 7.37 – 7.31 (m, 3H), 3.82 (d, *J* = 15.9 Hz, 1H), 3.76 (d, *J* = 15.9 Hz, 1H), 3.04 – 2.99 (m, 1H), 2.96 – 2.84 (m, 1H), 1.86 – 1.80 (m, 2H), 1.63 – 1.48 (m, 2H), 1.00 (t, *J* = 7.4 Hz, 3H).

<sup>13</sup>C NMR (151 MHz, CDCl<sub>3</sub>): δ 131.8, 128.9, 128.4, 122.0, 87.8, 77.7, 51.4, 43.1, 24.2, 22.1, 13.7.

IR (neat): 3063, 2925, 2217, 1673, 1490, 1025, 757, 750.

HRMS (ESI-TOF): calculated for C<sub>13</sub>H<sub>16</sub>OSNa([M+Na]<sup>+</sup>): 243.0814; found: 243.0810.

**ethyl 2-(butylsulfinyl)acetate (1s):**

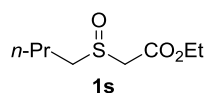

Following the general procedure, the title compound was prepared from corresponding sulfide (880 mg, 5.0 mmol) and it was obtained as colorless oil, 701 mg, 73% yield.

<sup>1</sup>H NMR (600 MHz, CDCl<sub>3</sub>): δ 4.20 (q, *J* = 7.1 Hz, 2H), 3.68 – 3.59 (m, 2H), 2.82 (dd, *J* = 8.4, 7.1 Hz, 2H), 1.82 – 1.66 (m, 2H), 1.56 – 1.36 (m, 2H), 1.33 – 1.20 (t, *J* = 7.1 Hz, 3H), 0.94 – 0.91 (t, *J* = 7.3 Hz, 3H).

<sup>13</sup>C NMR (151 MHz, CDCl<sub>3</sub>): δ 165.2, 62.1, 55.9, 52.6, 24.3, 21.9, 14.1, 13.6.

IR (neat): 3346, 1723, 1637, 1467, 1371, 1302, 1188, 1018.

HRMS (ESI-TOF): calculated for C<sub>8</sub>H<sub>16</sub>O<sub>3</sub>SNa([M+Na]<sup>+</sup>): 215.0712; found: 215.0710.

**2-(butylsulfinyl)-1-(pyrrolidin-1-yl)ethan-1-one (1u):**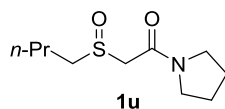

Following the general procedure, the title compound was prepared from corresponding sulfide (603 mg, 3.0 mmol) and it was obtained as colorless oil, 371 mg, 57% yield.

**<sup>1</sup>H NMR (600 MHz, CDCl<sub>3</sub>):** δ 3.81 – 3.62 (m, 2H), 3.61 – 3.34 (m, 4H), 2.99 – 2.93 (m, 1H), 2.91 – 2.76 (m, 1H), 1.96 – 1.91 (m, 2H), 1.87 – 1.83 (m, 2H), 1.77 – 1.71 (m, 2H), 1.57 – 1.31 (m, 2H), 1.02 – 0.82 (m, 3H).

**<sup>13</sup>C NMR (151 MHz, CDCl<sub>3</sub>):** δ 162.7, 56.4, 52.8, 47.5, 46.1, 26.0, 24.5, 24.4, 21.9, 13.7.

**IR (neat):** 3456, 2956, 2871, 1626, 1436, 1025, 914, 518.

**HRMS (ESI-TOF):** calculated for C<sub>10</sub>H<sub>19</sub>NO<sub>2</sub>SNa([M+Na]<sup>+</sup>): 240.1029; found: 240.1028.

**2-(benzylsulfinyl)-1-(pyrrolidin-1-yl)ethan-1-one (1v):**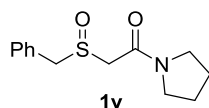

Following the general procedure, the title compound was prepared from corresponding sulfide (1.17 g, 5.0 mmol) and it was obtained as white solid, m.p. 100 – 101 °C, 1.13 g, 90% yield.

**<sup>1</sup>H NMR (600 MHz, CDCl<sub>3</sub>):** δ 7.44 – 7.28 (m, 5H), 4.41 – 4.32 (m, 1H), 4.16 – 4.06 (m, 1H), 3.56 – 3.54 (m, 2H), 3.51 – 3.47 (m, 2H), 3.46 – 3.31 (m, 2H), 2.00 – 1.91 (m, 2H), 1.89 – 1.83 (m, 2H).

**<sup>13</sup>C NMR (151 MHz, CDCl<sub>3</sub>):** δ 162.8, 130.6, 129.6, 128.8, 128.4, 57.5, 53.7, 47.4, 46.1, 26.0, 24.4.

**IR (neat):** 3471, 2965, 1743, 1683, 1433, 1029, 769, 700

**HRMS (ESI-TOF):** calculated for C<sub>13</sub>H<sub>17</sub>NO<sub>2</sub>SNa([M+Na]<sup>+</sup>): 274.0872; found: 274.0869.

**(1R,2S,5R)-2-isopropyl-5-methylcyclohexyl 2-(butylsulfinyl)acetate (1x):**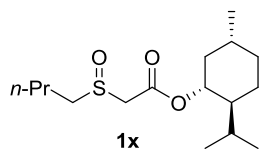

Following the general procedure, the title compound was prepared from corresponding sulfide (1.14 g, 4.0 mmol) and it was obtained as colorless oil, 1.02 g, 85% yield.

**<sup>1</sup>H NMR (600 MHz, CDCl<sub>3</sub>):** δ 4.82 – 4.67 (m, 1H), 3.76 – 3.57 (m, 2H), 2.92 – 2.75 (m, 2H), 2.06 – 1.93 (m, 1H), 1.93 – 1.72 (m, 3H), 1.67 (d, *J* = 11.5 Hz, 2H), 1.59 – 1.33 (m, 4H), 1.11 – 0.80 (m, 12H), 0.74 (dd, *J* = 6.9, 2.6 Hz, 3H).



**<sup>13</sup>C NMR (151 MHz, CDCl<sub>3</sub>):** δ 164.6, 76.3, 56.34, 56.2, 52.7, 52.5, 46.6, 40.6, 40.5, 33.9, 31.3, 26.0, 24.2, 24.1, 23.0, 21.8, 20.6, 16.0, 15.9, 13.5.

**IR (neat):** 2954, 2869, 1722, 1456, 1261, 1036, 982, 465.

**HRMS (ESI-TOF):** calculated for C<sub>16</sub>H<sub>30</sub>O<sub>3</sub>SNa([M+Na]<sup>+</sup>): 325.1808; found: 325.1812.

**(4S)-3-(2-(butylsulfinyl)acetyl)-4-isopropylloxazolidin-2-one (1y):**

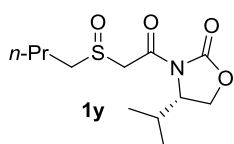

Following the general procedure, the title compound was prepared from corresponding sulfide (777 mg, 3.0 mmol) and it was obtained as white solid, m.p. 88 – 89 °C, 528 mg, 64% yield.

**<sup>1</sup>H NMR (600 MHz, CDCl<sub>3</sub>):** δ 4.54 (d, *J* = 13.6 Hz, 1H), 4.51 – 4.45 (m, 1H), 4.35 – 4.30 (m, 1H), 4.27 – 4.22 (m, 1H), 4.16 (d, *J* = 13.6 Hz, 1H), 2.92 – 2.81 (m, 2H), 2.44 – 2.35 (m, 1H), 1.82 – 1.72 (m, 2H), 1.56 – 1.41 (m, 2H), 0.95 (t, *J* = 7.4 Hz, 3H), 0.92 (d, *J* = 6.9 Hz, 3H), 0.87 (d, *J* = 6.9 Hz, 3H).

**<sup>13</sup>C NMR (151 MHz, CDCl<sub>3</sub>):** δ 164.5, 154.0, 63.8, 58.7, 56.4, 52.9, 28.3, 24.4, 21.9, 17.8, 14.6, 13.6.

**IR (neat):** 2961, 2864, 2160, 1742, 1455, 1026, 950, 825.

**HRMS (ESI-TOF):** calculated for C<sub>12</sub>H<sub>21</sub>NO<sub>4</sub>SNa([M+Na]): 298.1083; found: 298.1076.

### 3 Studies on the influence of reaction parameters.

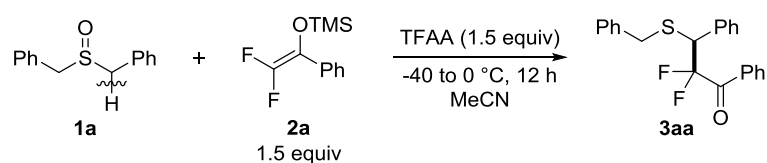

| entry | Variation from the “standard” conditions | yield of <b>3aa</b> |
|-------|------------------------------------------|---------------------|
| 1     | none                                     | 94%                 |
| 1     | Tf <sub>2</sub> O instead of TFAA        | 3%                  |
| 2     | TCAA instead of TFAA                     | 89%                 |
| 3     | Ts <sub>2</sub> O instead of TFAA        | 43%                 |
| 4     | Ac <sub>2</sub> O instead of TFAA        | 0%                  |
| 5     | DCM instead of MeCN                      | 41%                 |
| 6     | 0 °C instead of “-40 to 0 °C”            | 83%                 |

To a solution of dibenzyl sulfoxide **1a** (115 mg, 0.5 mmol) and enol silyl ether **2a** (0.75 mmol) in MeCN or DCM (2.5 mL, 0.2 M) was added anhydride (0.75 mmol) under the indicated temperature. After stirring for 5 min, the mixture was warmed to 0 °C and kept stirring for 12 h. After that, the mixture was passed through a short silica gel column, concentrated under vacuum and purified by flash chromatography on silica gel.

## 4 General procedure for reaction of alkyl sulfoxide **1** with enol silyl ethers

### 2

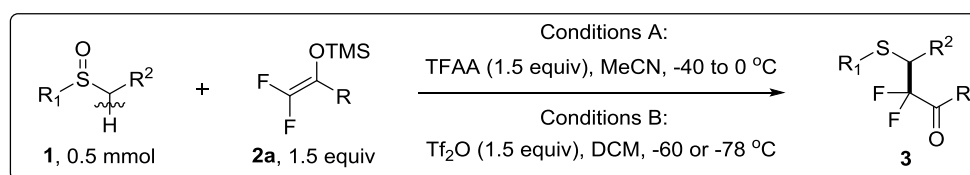

General procedure A: To a solution of alkyl sulfoxide **1** (0.5 mmol) and difluoroenol silyl ether **2** (0.75 mmol, 1.5 equiv) in MeCN (2.5 mL) was added trifluoroacetic anhydride (TFAA, 105  $\mu$ L, 0.75 mmol) at -40 °C. After stirring for 5 min, the reaction mixture was gradually warmed to 0 °C and kept stirring for 12 h (**3aa-3aq**, **3ba-3fa**) or 24 h (**3aa'-3aj'**). After that, the mixture was passed through a short silica gel column and concentrated under vacuum. The obtained residue was further purified by flash chromatography on silica gel affording product **3**.

General procedure B: To a solution of alkyl sulfoxides **1** (0.5 mmol) and difluoroenol silyl ether **2** (0.75 mmol, 1.5 equiv) in DCM (2.5 mL) was added trifluoromethanesulfonic anhydride (Tf<sub>2</sub>O, 125  $\mu$ L, 0.75 mmol) at -78 °C (**3ar**, **3at**, **3av**) or -60 °C (**3as**, **3au**, **3aw-3az**). After stirring for 5 min, the reaction mixture was gradually warmed to 0 °C and kept stirring for 6 h. After that, the mixture was passed through a short silica gel column and concentrated under vacuum. The obtained residue was further purified by flash chromatography on silica gel affording product **3**.

### 3-(benzylthio)-2,2-difluoro-1,3-diphenylpropan-1-one (**3aa**):

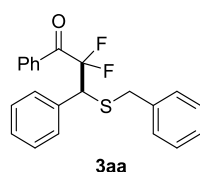

Following the general procedure A, the title compound was obtained as light yellow oil, 173 mg, 94% yield. (*R*<sub>f</sub> = 0.30, eluent: PE/EtOAc = 40/1).

<sup>1</sup>H NMR (600 MHz, CDCl<sub>3</sub>):  $\delta$  7.95 (d, *J* = 8.1 Hz, 2H), 7.65 – 7.60 (m, 1H), 7.48 – 7.44 (m, 2H), 7.37 – 5.32 (m, 5H), 7.30 – 7.25 (m, 3H), 7.23 – 7.20 (m, 2H), 4.44 (dd, *J* = 18.7, 13.1 Hz, 1H), 3.73 (dd, *J* = 110.6, 13.2 Hz, 2H).

<sup>13</sup>C NMR (151 MHz, CDCl<sub>3</sub>):  $\delta$  189.5 (t, *J* = 31.7 Hz), 136.6, 134.2, 134.1, 132.9, 130.0, 129.9 (t, *J* = 3.0 Hz), 129.3, 128.7, 128.63, 128.60, 128.5, 127.5, 118.2 (t, *J* = 256.7 Hz), 51.4 (t, *J* = 22.7 Hz), 36.7.

<sup>19</sup>F NMR (565 MHz, CDCl<sub>3</sub>):  $\delta$  -96.9 (d, *J* = 265.6 Hz, 1F), -103.5 (d, *J* = 271.2 Hz, 1F).

IR (neat): 1692, 1448, 1266, 1167, 1058, 918, 695, 683.

**HRMS (ESI-TOF):** calculated for [C<sub>22</sub>H<sub>18</sub>F<sub>2</sub>OSNa (M + Na<sup>+</sup>): 391.0939, found: 391.0938.

**3-(butylthio)-2,2-difluoro-1,3-diphenylpropan-1-one (3ab):**

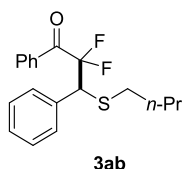

Following the general procedure A, the title compound was obtained as light yellow oil, 159 mg, 95% yield. (R<sub>f</sub> = 0.32, eluent: PE/EtOAc = 40/1).

**<sup>1</sup>H NMR (600 MHz, CDCl<sub>3</sub>):** δ 8.00 (d, *J* = 7.9 Hz, 2H), 7.63 – 7.59 (m, 1H), 7.50 – 7.44 (m, 4H), 7.38 – 7.30 (m, 3H), 4.59 (dd, *J* = 20.1, 11.7 Hz, 1H), 2.60

– 2.41 (m, 2H), 1.52 – 1.42 (m, 2H), 1.35 – 1.25 (m, 2H), 0.82 (t, *J* = 7.4 Hz, 3H).

**<sup>13</sup>C NMR (151 MHz, CDCl<sub>3</sub>):** δ 190.2 (t, *J* = 28.7 Hz), 134.9, 134.1, 133.3, 130.0 (t, *J* = 3.0 Hz), 129.9, 128.7, 128.6, 128.5, 119.9 (t, *J* = 259.7 Hz), 52.5 (t, *J* = 22.7 Hz), 32.7, 31.1, 21.8, 13.6.

**<sup>19</sup>F NMR (565 MHz, CDCl<sub>3</sub>):** δ -95.7 (d, *J* = 271.2 Hz, 1F), -105.1 (d, *J* = 271.2 Hz, 1F).

**IR (neat):** 3062, 2958, 2872, 1701, 1495, 1379, 1077, 859.

**HRMS (ESI-TOF):** calculated for [C<sub>19</sub>H<sub>20</sub>F<sub>2</sub>OSNa (M + Na<sup>+</sup>): 357.1095, found: 357.1110.

**3-(butylthio)-2,2-difluoro-1-phenyl-3-(p-tolyl)propan-1-one (3ac):**

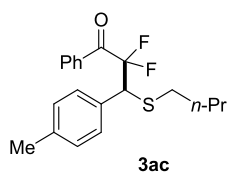

Following the general procedure A, the title compound was obtained as light yellow oil, 149.6 mg, 86% yield. (R<sub>f</sub> = 0.33, eluent: PE/EtOAc = 40/1).

**<sup>1</sup>H NMR (600 MHz, CDCl<sub>3</sub>):** δ 8.01 (d, *J* = 7.9 Hz, 2H), 7.63 – 7.59 (m, 1H), 7.49 – 7.45 (m, 2H), 7.34 (d, *J* = 7.9 Hz, 2H), 7.15 (d, *J* = 7.9 Hz, 2H), 4.55 (dd, *J* = 20.1, 11.8 Hz, 1H), 2.54 – 2.44 (m, 2H), 2.34 (s, 3H), 1.48 – 1.42 (m, 2H), 1.32 – 1.26 (m, 2H), 0.82 (t, *J* = 7.4 Hz, 3H).

**<sup>13</sup>C NMR (151 MHz, CDCl<sub>3</sub>):** δ 190.3 (t, *J* = 31.7 Hz), 138.3, 134.1, 133.3, 131.7, 130.0 (t, *J* = 3.0 Hz), 129.9, 128.3, 128.7, 118.2 (t, *J* = 259.7 Hz), 52.5 (t, *J* = 22.7 Hz), 32.6, 31.1, 21.8, 21.3, 13.7.

**<sup>19</sup>F NMR (565 MHz, CDCl<sub>3</sub>):** δ -95.8 (d, *J* = 271.2 Hz, 1F), -105.2 (d, *J* = 271.2 Hz, 1F).

**IR (neat):** 2957, 2872, 2356, 1909, 1701, 1579, 1379, 866.

**HRMS (ESI-TOF):** calculated for [C<sub>20</sub>H<sub>22</sub>F<sub>2</sub>OSNa (M + Na<sup>+</sup>): 371.1252, found: 371.1256.

### 3-(4-bromophenyl)-3-(butylthio)-2,2-difluoro-1-phenylpropan-1-one (3ad):

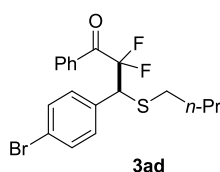

Following the general procedure A, the title compound was obtained as light yellow oil, 186 mg, 90% yield. ( $R_f = 0.27$ , eluent: PE/EtOAc = 50/1).

$^1\text{H NMR}$  (600 MHz,  $\text{CDCl}_3$ ):  $\delta$  8.02 (d,  $J = 8.0$  Hz, 2H), 7.65 – 7.61 (m, 1H), 7.51 – 7.45 (m, 4H), 7.35 (d,  $J = 8.3$  Hz, 2H), 4.55 (dd,  $J = 20.4, 11.0$

Hz, 1H), 2.55 – 2.45 (m, 2H), 1.48 – 1.39 (m, 2H), 1.31 – 1.25 (m, 2H), 0.82 (t,  $J = 7.4$  Hz, 3H).

$^{13}\text{C NMR}$  (151 MHz,  $\text{CDCl}_3$ ):  $\delta$  189.8 (t,  $J = 30.2$  Hz), 134.3, 134.1, 133.0, 131.7, 131.6, 130.0 (t,  $J = 3.0$  Hz), 128.8, 122.6, 117.9 (t,  $J = 259.7$  Hz), 51.8 (t,  $J = 22.7$  Hz), 32.7, 31.0, 21.8, 13.6.

$^{19}\text{F NMR}$  (565 MHz,  $\text{CDCl}_3$ ):  $\delta$  -94.9 (d,  $J = 271.2$  Hz, 1F), -105.6 (d,  $J = 271.2$  Hz, 1F).

**IR** (neat): 3062, 2872, 2138, 1579, 1307, 1211, 1001, 867.

**HRMS** (ESI-TOF): calculated for  $[\text{C}_{19}\text{H}_{19}\text{BrF}_2\text{OSNa} (\text{M} + \text{Na}^+)]$ : 435.0200, found: 435.0216.

### 3-(butylthio)-2,2-difluoro-1-phenyl-3-(m-tolyl)propan-1-one (3ae):

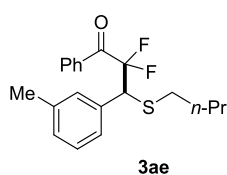

Following the general procedure A, the title compound was obtained as light yellow oil, 149.5 mg, 86% yield. ( $R_f = 0.31$ , eluent: PE/EtOAc = 40/1).

$^1\text{H NMR}$  (600 MHz,  $\text{CDCl}_3$ ):  $\delta$  7.99 (d,  $J = 7.8$  Hz, 2H), 7.63 – 7.57 (m, 2H), 7.49 – 7.44 (m, 2H), 7.22 – 7.12 (m, 3H), 4.89 (dd,  $J = 21.0, 11.0$  Hz, 1H), 2.61 – 2.46 (m, 2H), 2.37 (s, 3H), 1.49 – 1.39 (m, 2H), 1.32 – 1.25 (m, 2H), 0.82 (t,  $J = 7.4$  Hz, 3H).

$^{13}\text{C NMR}$  (151 MHz,  $\text{CDCl}_3$ ):  $\delta$  190.6 (t,  $J = 30.2$  Hz), 136.9, 134.1, 133.4, 130.5, 130.01 (t,  $J = 3.0$  Hz), 130.00, 129.8, 128.7, 128.3, 126.5, 118.8 (t,  $J = 259.7$  Hz), 51.8 (t,  $J = 22.7$  Hz), 32.7, 31.3, 21.8, 20.0, 13.7.

$^{19}\text{F NMR}$  (565 MHz,  $\text{CDCl}_3$ ):  $\delta$  -95.6 (d,  $J = 271.2$  Hz, 1F), -103.9 (d,  $J = 271.2$  Hz, 1F).

**IR** (neat): 2957, 2872, 2360, 1580, 1379, 1241, 1001, 831.

**HRMS** (ESI-TOF): calculated for  $[\text{C}_{20}\text{H}_{22}\text{F}_2\text{OSNa} (\text{M} + \text{Na}^+)]$ : 371.1252, found: 371.1260.

### 3-(1-(butylthio)-2,2-difluoro-3-oxo-3-phenylpropyl)benzotrile (3af):

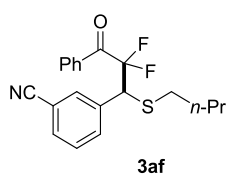

Following the general procedure A, the title compound was obtained as light yellow oil, 136 mg, 76% yield. ( $R_f = 0.25$ , eluent: PE/EtOAc = 20/1).

$^1\text{H NMR}$  (600 MHz,  $\text{CDCl}_3$ ):  $\delta$  8.03 (d,  $J = 7.9$  Hz, 2H), 7.80 (s, 1H), 7.73 (d,  $J = 7.9$  Hz, 1H), 7.66 – 7.57 (m, 2H), 7.52 – 7.44 (m, 3H), 4.60 (dd,  $J =$

21.1, 10.0 Hz, 1H), 2.53 – 2.44 (m, 2H), 1.48 – 1.38 (m, 2H), 1.33 – 1.21 (m, 2H), 0.81 (t,  $J = 7.4$  Hz, 3H).

$^{13}\text{C}$  NMR (151 MHz,  $\text{CDCl}_3$ ):  $\delta$  189.3 (t,  $J = 28.7$  Hz), 136.9, 134.5, 134.4, 133.5, 132.7, 132.0, 130.0, 129.4, 128.8, 118.5, 117.7 (t,  $J = 259.7$  Hz), 112.7, 51.6 (t,  $J = 24.2$  Hz), 32.9, 30.9, 21.7, 13.6.

$^{19}\text{F}$  NMR (565 MHz,  $\text{CDCl}_3$ ):  $\delta$  -93.6 (d,  $J = 276.9$  Hz, 1F), -106.2 (d,  $J = 276.9$  Hz, 1F).

IR (neat): 2958, 2871, 2224, 1977, 1579, 1378, 1213, 1000.

HRMS (ESI-TOF): calculated for  $[\text{C}_{20}\text{H}_{19}\text{F}_2\text{NOSNa} (\text{M} + \text{Na}^+)]$ : 382.1048, found: 383.1062.

### 3-(butylthio)-2,2-difluoro-1-phenyl-3-(*o*-tolyl)propan-1-one (3ag):

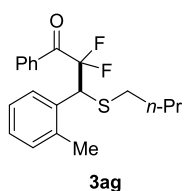

Following the general procedure A, the title compound was obtained as light yellow oil, 130.3 mg, 75% yield. ( $R_f = 0.30$ , eluent: PE/EtOAc = 50/1).

$^1\text{H}$  NMR (600 MHz,  $\text{CDCl}_3$ ):  $\delta$  8.02 (d,  $J = 7.8$  Hz, 2H), 7.64 – 7.59 (m, 1H), 7.48 (dd,  $J = 8.1, 7.7$  Hz, 2H), 7.30 – 7.21 (m, 3H), 7.14 (d,  $J = 7.2$  Hz, 1H),

4.57 (dd,  $J = 20.4, 11.5$  Hz, 1H), 2.58 – 2.48 (m, 2H), 2.36 (s, 3H), 1.52 – 1.43 (m, 2H), 1.34 – 1.27 (m, 2H), 0.84 (t,  $J = 7.4$  Hz, 3H).

$^{13}\text{C}$  NMR (151 MHz,  $\text{CDCl}_3$ ):  $\delta$  190.2 (t,  $J = 30.2$  Hz), 138.2, 134.7, 134.1, 133.3, 130.5, 130.1 (t,  $J = 3.0$  Hz), 129.3, 128.7, 128.4, 127.0, 118.2 (t,  $J = 259.7$  Hz), 52.4 (t,  $J = 24.2$  Hz), 32.7, 31.0, 21.8, 21.5, 13.6.

$^{19}\text{F}$  NMR (565 MHz,  $\text{CDCl}_3$ ):  $\delta$  -95.5 (d,  $J = 271.2$  Hz, 1F), -105.2 (d,  $J = 271.2$  Hz, 1F).

IR (neat): 3062, 3026, 2872, 2337, 2022, 1580, 1001, 858.

HRMS (ESI-TOF): calculated for  $[\text{C}_{20}\text{H}_{22}\text{F}_2\text{OSNa} (\text{M} + \text{Na}^+)]$ : 372.1252, found: 372.1265.

### 2-(1-(butylthio)-2,2-difluoro-3-oxo-3-phenylpropyl)benzonitrile (3ah):

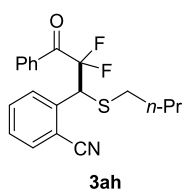

Following the general procedure A, the title compound was obtained as light yellow oil, 172.1 mg, 96% yield. ( $R_f = 0.31$ , eluent: PE/EtOAc = 20/1).

$^1\text{H}$  NMR (600 MHz,  $\text{CDCl}_3$ ):  $\delta$  8.03 (d,  $J = 7.8$  Hz, 2H), 7.80 (s, 1H), 7.73 (d,  $J = 7.9$  Hz, 1H), 7.67 – 7.58 (m, 2H), 7.51 – 7.44 (m, 3H), 4.61 (dd,  $J = 21.1,$

10.0 Hz, 1H), 2.60 – 2.42 (m, 2H), 1.49 – 1.39 (m, 2H), 1.32 – 1.24 (m, 2H), 0.81 (t,  $J = 7.4$  Hz, 3H).

**<sup>13</sup>C NMR (151 MHz, CDCl<sub>3</sub>):** δ 189.3 (t, *J* = 30.2 Hz), 136.9, 134.5, 134.4, 133.5, 132.7, 132.0, 130.1 (t, *J* = 3.0 Hz), 129.4, 128.8, 118.5 (t, *J* = 259.7 Hz), 116.0, 112.7, 51.6 (t, *J* = 24.2 Hz), 32.8, 31.0, 21.7, 13.5.

**<sup>19</sup>F NMR (565 MHz, CDCl<sub>3</sub>):** δ -93.5 (d, *J* = 271.2 Hz, 1F), -106.2 (d, *J* = 271.2 Hz, 1F).

**IR (neat):** 3063, 2872, 2231, 1700, 1580, 1379, 1001, 830.

**HRMS (ESI-TOF):** calculated for [C<sub>20</sub>H<sub>19</sub>F<sub>2</sub>NOSNa (M + Na<sup>+</sup>): 382.1048, found: 382.1066.

### 2,2-difluoro-3-(methylthio)-1,3-diphenylpropan-1-one (3ai):

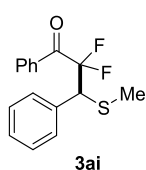

Following the general procedure A, the title compound was obtained as light yellow oil, 121.2 mg, 83% yield. (R<sub>f</sub> = 0.41, eluent: PE/EtOAc = 50/1).

**<sup>1</sup>H NMR (600 MHz, CDCl<sub>3</sub>):** δ 8.00 (d, *J* = 7.9 Hz, 2H), 7.63 – 7.59 (m, 1H), 7.49 – 7.43 (m, 4H), 7.37 – 7.31 (m, 3H), 4.56 (dd, *J* = 19.3, 12.3 Hz, 1H), 2.09 (s, 3H).

**<sup>13</sup>C NMR (151 MHz, CDCl<sub>3</sub>):** δ 190.0 (t, *J* = 30.2 Hz), 134.2, 134.1, 133.1, 130.0 (t, *J* = 3.0 Hz), 129.9, 128.7, 128.6, 128.5, 118.4 (t, *J* = 259.7 Hz), 53.9 (t, *J* = 24.2 Hz), 16.0.

**<sup>19</sup>F NMR (565 MHz, CDCl<sub>3</sub>):** δ -96.6 (d, *J* = 271.2 Hz, 1F), -104.0 (d, *J* = 271.2 Hz, 1F).

**IR (neat):** 3062, 2921, 1700, 1579, 1303, 1214, 1077, 1001.

**HRMS (ESI-TOF):** calculated for [C<sub>16</sub>H<sub>14</sub>F<sub>2</sub>OSNa (M + Na<sup>+</sup>): 315.0626, found: 315.0626.

### 2,2-difluoro-3-(isopropylthio)-1,3-diphenylpropan-1-one (3aj):

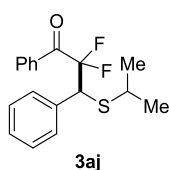

Following the general procedure A, the title compound was obtained as light yellow oil, 92.6 mg, 58% yield. (R<sub>f</sub> = 0.44, eluent: PE/EtOAc = 50/1).

**<sup>1</sup>H NMR (600 MHz, CDCl<sub>3</sub>):** δ 7.99 (d, *J* = 7.8 Hz, 2H), 7.62 – 7.58 (m, 1H), 7.50 – 7.44 (m, 4H), 7.37 – 7.29 (m, 3H), 4.62 (dd, *J* = 20.6, 11.3 Hz, 1H), 2.92 – 2.84 (m, 1H), 1.17 (dd, *J* = 10.7, 6.7 Hz, 6H).

**<sup>13</sup>C NMR (151 MHz, CDCl<sub>3</sub>):** δ 190.5 (t, *J* = 30.2 Hz), 135.4, 134.1, 133.4, 130.1, 130.0 (t, *J* = 3.0 Hz), 128.7, 128.6, 128.5, 118.1 (t, *J* = 259.7 Hz), 51.5 (t, *J* = 24.2 Hz), 36.7, 23.4, 23.0.

**<sup>19</sup>F NMR (565 MHz, CDCl<sub>3</sub>):** δ -95.1 (d, *J* = 271.2 Hz, 1F), -105.6 (d, *J* = 271.2 Hz, 1F).

**IR (neat):** 3063, 2866, 1696, 1579, 1287, 1076, 1001, 859.

**HRMS (ESI-TOF):** calculated for [C<sub>18</sub>H<sub>18</sub>F<sub>2</sub>OSNa (M + Na<sup>+</sup>): 343.0939, found: 343.0939.

### 3-(cyclohexylthio)-2,2-difluoro-1,3-diphenylpropan-1-one (3ak):

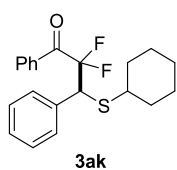

Following the general procedure A, the title compound was obtained as light yellow oil, 97 mg, 54% yield. ( $R_f = 0.41$ , eluent: PE/EtOAc = 50/1).

$^1\text{H NMR}$  (600 MHz,  $\text{CDCl}_3$ ):  $\delta$  7.99 (d,  $J = 7.7$  Hz, 2H), 7.65 – 7.57 (m, 1H), 7.48 – 7.43 (m, 4H), 7.37 – 7.28 (m, 3H), 4.63 (dd,  $J = 21.2, 11.0$  Hz, 1H), 2.71

– 2.56 (m, 1H), 1.88 – 1.76 (m, 2H), 1.70 – 1.62 (m, 2H), 1.56 – 1.50 (m, 1H), 1.30 – 1.17 (m, 5H).

$^{13}\text{C NMR}$  (151 MHz,  $\text{CDCl}_3$ ):  $\delta$  190.6 (t,  $J = 30.2$  Hz), 135.7, 134.0, 133.5, 130.0 (t,  $J = 3.0$  Hz), 128.8, 128.7, 128.5, 128.4, 118.1 (t,  $J = 259.7$  Hz), 50.8 (t,  $J = 24.2$  Hz), 45.1, 33.6, 33.0, 25.9, 25.8, 25.7.

$^{19}\text{F NMR}$  (565 MHz,  $\text{CDCl}_3$ ):  $\delta$  -94.6 (d,  $J = 271.2$  Hz, 1F), -106.1 (d,  $J = 271.2$  Hz, 1F).

**IR** (neat): 3062, 2852, 1598, 1494, 1288, 1077, 857, 770.

**HRMS** (ESI-TOF): calculated for  $[\text{C}_{21}\text{H}_{22}\text{F}_2\text{OSNa} (\text{M} + \text{Na}^+)]$ : 383.1252, found: 383.1265.

### 2,2-difluoro-3-(methylthio)-3-(naphthalen-2-yl)-1-phenylpropan-1-one (3al):

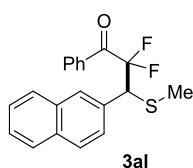

Following the general procedure A, the title compound was obtained as light yellow oil, 138.7 mg, 81% yield. ( $R_f = 0.37$ , eluent: PE/EtOAc = 50/1).

$^1\text{H NMR}$  (600 MHz,  $\text{CDCl}_3$ ):  $\delta$  8.06 (d,  $J = 7.8$  Hz, 2H), 7.91 – 7.83 (m, 4H), 7.68 – 7.60 (m, 2H), 7.53 – 7.46 (m, 4H), 4.78 (dd,  $J = 19.6, 12.1$  Hz, 1H),

2.11 (s, 3H).

$^{13}\text{C NMR}$  (151 MHz,  $\text{CDCl}_3$ ):  $\delta$  189.8 (t,  $J = 30.2$  Hz), 134.2, 133.2, 133.0, 132.9, 131.4, 130.0 (t,  $J = 3.0$  Hz), 129.3, 128.7, 128.6, 128.1, 127.7, 127.1, 126.6, 126.5, 118.5 (t,  $J = 259.7$  Hz), 54.0 (t,  $J = 24.2$  Hz), 15.8.

$^{19}\text{F NMR}$  (565 MHz,  $\text{CDCl}_3$ ):  $\delta$  -95.8 (d,  $J = 271.2$  Hz, 1F), -103.8 (d,  $J = 271.2$  Hz, 1F).

**IR** (neat): 3060, 2921, 1918, 1578, 1368, 1314, 1001, 869.

**HRMS** (ESI-TOF): calculated for  $[\text{C}_{20}\text{H}_{16}\text{F}_2\text{OSNa} (\text{M} + \text{Na}^+)]$ : 365.0782, found: 365.0790.

### 2,2-difluoro-3-(methylthio)-1-phenyl-3-(thiophen-2-yl)propan-1-one (3am):

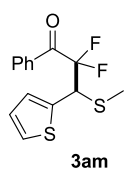

Following the general procedure A, the title compound was obtained as light yellow oil, 92.4 mg, 62% yield. ( $R_f = 0.40$ , eluent: PE/EtOAc = 20/1). Note:  $^{19}\text{F-NMR}$



spectra of **3am** show some unknown impurities although many eluent system are tried during flash column separation (PE/EtOAc, PE/Et<sub>2</sub>O, PE/Acetone, PE/MeOH).

**<sup>1</sup>H NMR (600 MHz, CDCl<sub>3</sub>):** δ 8.03 (d, *J* = 7.7 Hz, 2H), 7.63 (dd, *J* = 10.6, 4.2 Hz, 1H), 7.51 – 7.46 (m, 2H), 7.32 (dd, *J* = 5.1, 1.0 Hz, 1H), 7.13 (d, *J* = 3.4 Hz, 1H), 6.98 (dd, *J* = 5.1, 3.6 Hz, 1H), 4.90 (dd, *J* = 18.6, 11.9 Hz, 1H), 2.13 (s, 3H).

**<sup>13</sup>C NMR (151 MHz, CDCl<sub>3</sub>):** δ 189.6 (t, *J* = 30.2 Hz), 136.3, 134.4, 132.9, 130.0 (t, *J* = 3.0 Hz), 128.8, 128.7, 126.9, 126.7, 117.8 (t, *J* = 259.7 Hz), 48.8 (t, *J* = 24.2 Hz), 15.7.

**<sup>19</sup>F NMR (565 MHz, CDCl<sub>3</sub>):** δ -96.0 (d, *J* = 271.2 Hz, 1F), -104.8 (d, *J* = 271.2 Hz, 1F).

**IR (neat):** 3072, 2922, 1698, 1579, 1274, 1001, 970, 856.

**HRMS (ESI-TOF):** calculated for [C<sub>14</sub>H<sub>12</sub>F<sub>2</sub>OS<sub>2</sub>Na (M + Na<sup>+</sup>): 321.0190, found: 321.0193.

#### 2,2-difluoro-3-(hexylthio)-1-phenylpent-4-en-1-one (**3an**):

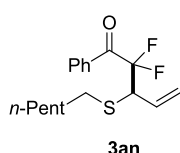

Following the general procedure A, the title compound was obtained as light yellow oil, 68 mg, 44% yield. (*R*<sub>f</sub> = 0.35, eluent: PE/EtOAc = 50/1).

**<sup>1</sup>H NMR (600 MHz, CDCl<sub>3</sub>):** δ 8.05 (d, *J* = 7.8 Hz, 2H), 7.65 – 7.61 (m, 1H), 7.53 – 7.47 (m, 2H), 5.96 – 5.86 (m, 1H), 5.36 – 5.28 (m, 2H), 4.02 – 3.85 (m, 1H), 2.61 – 2.46 (m, 2H), 1.55 – 1.45 (m, 2H), 1.34 – 1.17 (m, 6H), 0.86 (t, *J* = 7.1 Hz, 3H).

**<sup>13</sup>C NMR (151 MHz, CDCl<sub>3</sub>):** δ 189.6 (t, *J* = 30.2 Hz), 134.3, 133.1, 130.6 (t, *J* = 3.0 Hz), 130.0 (t, *J* = 3.0 Hz), 128.8, 120.5, 118.2 (t, *J* = 259.7 Hz), 51.3 (t, *J* = 24.2 Hz), 31.8, 31.4, 29.1, 28.5, 22.6, 14.1.

**<sup>19</sup>F NMR (565 MHz, CDCl<sub>3</sub>):** δ -96.6 (d, *J* = 271.2 Hz, 1F), -106.4 (d, *J* = 271.2 Hz, 1F).

**IR (neat):** 2955, 2856, 2341, 1636, 1419, 1378, 1101, 987.

**HRMS (ESI-TOF):** calculated for [C<sub>17</sub>H<sub>22</sub>F<sub>2</sub>OSNa (M + Na<sup>+</sup>): 335.1252, found: 335.1252.

#### 2,2-difluoro-3-(hexylthio)-5-methyl-1-phenylhex-4-en-1-one (**3ao**):

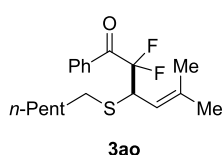

Following the general procedure, A the title compound was obtained as light yellow oil, 75 mg, 44% yield. (*R*<sub>f</sub> = 0.33, eluent: PE/EtOAc = 50/1).

**<sup>1</sup>H NMR (600 MHz, CDCl<sub>3</sub>):** δ 8.03 (d, *J* = 7.8 Hz, 2H), 7.64 – 7.60 (m, 1H), 7.52 – 7.47 (m, 2H), 5.26 – 5.17 (m, 1H), 4.28 – 4.18 (m, 1H), 2.64 – 2.48 (m, 2H), 1.76 (d, *J* = 0.9 Hz, 3H), 1.62 (d, *J* = 0.9 Hz, 3H), 1.54 – 1.46 (m, 2H), 1.33 – 1.22 (m, 6H), 0.87 (t, *J* = 6.9

Hz, 3H).

**<sup>13</sup>C NMR (151 MHz, CDCl<sub>3</sub>):** δ 189.9 (t, *J* = 30.2 Hz), 138.9, 134.1, 133.3, 130.0 (t, *J* = 3.0 Hz), 128.8, 118.6 (t, *J* = 259.7 Hz), 117.0, 46.1 (t, *J* = 24.2 Hz), 31.5, 31.4, 26.0, 22.6, 18.4, 14.1.

**<sup>19</sup>F NMR (565 MHz, CDCl<sub>3</sub>):** δ -99.9 (d, *J* = 271.2 Hz, 1F), -104.7 (d, *J* = 271.2 Hz, 1F).

**IR (neat):** 2956, 2356, 2167, 1580, 1377, 1114, 1001, 778.

**HRMS (ESI-TOF):** calculated for [C<sub>19</sub>H<sub>26</sub>F<sub>2</sub>OSNa (M + Na<sup>+</sup>): 363.1565, found: 363.1568.

**2,2-difluoro-3-(hexylthio)-1-phenylpent-4-yn-1-one (3ap):**

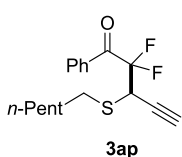

Following the general procedure A, the title compound was obtained as light yellow oil, 88.4 mg, 57% yield. (*R*<sub>f</sub> = 0.36, eluent: PE/EtOAc = 50/1).

**<sup>1</sup>H NMR (600 MHz, CDCl<sub>3</sub>):** δ 8.08 (d, *J* = 7.7 Hz, 2H), 7.69 - 7.63 (m, 1H), 7.53 - 7.49 (m, 2H), 4.42 - 4.35 (m, 1H), 2.88 - 2.75 (m, 2H), 2.55 (d, *J* = 2.6 Hz, 1H), 1.62 - 1.55 (m, 2H), 1.41 - 1.32 (m, 2H), 1.30 - 1.24 (m, 4H), 0.87 (t, *J* = 7.0 Hz, 3H).

**<sup>13</sup>C NMR (151 MHz, CDCl<sub>3</sub>):** δ 188.6 (t, *J* = 30.2 Hz), 134.6, 132.6, 130.0 (t, *J* = 3.0 Hz), 128.8, 117.0 (t, *J* = 259.7 Hz), 76.0, 75.6, 38.6 (t, *J* = 24.2 Hz), 31.8, 31.5, 29.1, 28.6, 22.6, 14.1.

**<sup>19</sup>F NMR (565 MHz, CDCl<sub>3</sub>):** δ -96.4 (d, *J* = 271.2 Hz, 1F), -105.2 (d, *J* = 271.2 Hz, 1F).

**IR (neat):** 3304, 2966, 2856, 2125, 1580, 1308, 1001, 876.

**HRMS (ESI-TOF):** calculated for [C<sub>17</sub>H<sub>20</sub>F<sub>2</sub>OSNa (M + Na<sup>+</sup>): 333.1095, found: 333.1104.

**2,2-difluoro-3-(hexylthio)-1,5-diphenylpent-4-yn-1-one (3aq):**

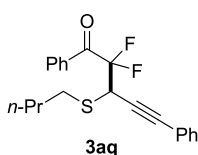

Following the general procedure A, the title compound was obtained as light yellow oil, 95 mg, 53% yield. (*R*<sub>f</sub> = 0.30, eluent: PE/EtOAc = 40/1).

**<sup>1</sup>H NMR (600 MHz, CDCl<sub>3</sub>):** δ 8.11 (d, *J* = 7.7 Hz, 2H), 7.66 - 7.63 (m, 1H), 7.53 - 7.49 (m, 2H), 7.44 - 7.39 (m, 2H), 7.36 - 7.28 (m, 3H), 4.60 (dd, *J* = 15.6, 12.2 Hz, 1H), 2.92 - 2.82 (m, 2H), 1.66 - 1.60 (m, 2H), 1.45 - 1.38 (m, 2H), 0.91 (t, *J* = 7.4 Hz, 3H).

**<sup>13</sup>C NMR (151 MHz, CDCl<sub>3</sub>):** δ 189.1 (t, *J* = 30.2 Hz), 134.5, 132.8, 132.0, 130.0 (t, *J* = 3.0 Hz), 128.9, 128.8, 128.4, 122.2, 117.2 (t, *J* = 259.7 Hz), 117.0, 87.9, 80.7, 39.7 (t, *J* = 24.2 Hz), 31.44, 31.40, 22.1, 13.8.

**<sup>19</sup>F NMR (565 MHz, CDCl<sub>3</sub>):** δ -97.2 (d, *J* = 271.2 Hz, 1F), -104.6 (d, *J* = 271.2 Hz, 1F).

**IR (neat):** 3061, 2929, 2872, 2228, 1579, 1379, 1001, 883.

**HRMS (ESI-TOF):** calculated for [C<sub>21</sub>H<sub>20</sub>F<sub>2</sub>OS (M + Na<sup>+</sup>): 381.1095, found: 381.1102.

**Methyl 2-((2-ethoxy-2-oxoethyl)thio)-3,3-difluoro-4-oxo-4-phenylbutanoate (3ar):**

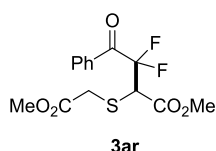

Following the general procedure B, the title compound was obtained as light yellow oil, 71.4 mg, 43% yield. (R<sub>f</sub> = 0.30, eluent: PE/EtOAc = 5/1).

**<sup>1</sup>H NMR (600 MHz, CDCl<sub>3</sub>):** δ 8.09 (d, *J* = 7.5 Hz, 2H), 7.69 – 7.63 (m, 1H), 7.53 – 7.49 (m, 2H), 4.45 (dd, *J* = 17.0, 11.5 Hz, 1H), 3.80 (s, 3H), 3.76 (s, 3H), 3.55 (q, *J* = 15.5 Hz, 2H).

**<sup>13</sup>C NMR (151 MHz, CDCl<sub>3</sub>):** δ 189.1 (t, *J* = 30.2 Hz), 169.8, 167.5, 134.5, 132.8, 130.0 (t, *J* = 3.0 Hz), 128.9, 117.2 (t, *J* = 259.7 Hz), 61.2 (t, *J* = 24.2 Hz), 53.2, 52.8, 34.0.

**<sup>19</sup>F NMR (565 MHz, CDCl<sub>3</sub>):** δ -100.0 (d, *J* = 271.2 Hz, 1F), -102.2 (d, *J* = 271.2 Hz, 1F).

**IR (neat):** 3012, 2924, 2008, 1735, 1560, 1449, 1054, 842.

The title compound was detected by LC/TOF-MS with ESI and APCI sources, unfortunately the expected MS was not found.

**ethyl 2-(butylthio)-3,3-difluoro-4-oxo-4-phenylbutanoate (3as):**

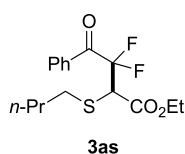

Following the general procedure B, the title compound was obtained as light yellow oil, 152 mg, 92% yield. (R<sub>f</sub> = 0.25, eluent: PE/EtOAc = 40/1).

**<sup>1</sup>H NMR (600 MHz, CDCl<sub>3</sub>):** δ 8.09 (d, *J* = 7.9 Hz, 2H), 7.67 – 7.61 (m, 1H), 7.53 – 7.47 (m, 2H), 4.28 – 4.20 (m, 2H), 4.16 (dd, *J* = 17.4, 11.9 Hz, 1H), 2.85 – 2.79 (m, 1H), 2.77 – 2.71 (m, 1H), 1.64 – 1.57 (m, 2H), 1.45 – 1.38 (m, 2H), 1.28 (t, *J* = 7.1 Hz, 3H), 0.91 (t, *J* = 7.4 Hz, 3H).

**<sup>13</sup>C NMR (151 MHz, CDCl<sub>3</sub>):** δ 189.1 (t, *J* = 30.2 Hz), 167.7, 134.6, 132.0, 130.3 (t, *J* = 3.0 Hz), 128.8, 116.8 (t, *J* = 259.7 Hz), 62.0, 49.9 (t, *J* = 24.2 Hz), 32.9, 31.3, 21.8, 14.1, 13.7.

**<sup>19</sup>F NMR (565 MHz, CDCl<sub>3</sub>):** δ -100.4 (d, *J* = 271.2 Hz, 1F), -102.3 (d, *J* = 271.2 Hz, 1F).

**IR (neat):** 2932, 2873, 1698, 1596, 1465, 1097, 1001, 866.

**HRMS (ESI-TOF):** calculated for [C<sub>16</sub>H<sub>20</sub>F<sub>2</sub>O<sub>3</sub>SNa (M + Na<sup>+</sup>): 353.0993, found: 353.1004.

**ethyl 2-(benzylthio)-3,3-difluoro-4-oxo-4-phenylbutanoate (3at):**

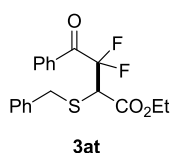

Following the general procedure B, the title compound was obtained as light

yellow oil, 83.8 mg, 46% yield. (R<sub>f</sub> = 0.30, eluent: PE/EtOAc = 10/1).

**<sup>1</sup>H NMR (600 MHz, CDCl<sub>3</sub>):** δ 8.09 (d, *J* = 7.9 Hz, 2H), 7.66 (d, *J* = 7.3 Hz, 1H), 7.53 – 7.49 (m, 2H), 7.41 – 7.33 (m, 4H), 7.32 – 7.28 (m, 1H), 4.20 (q, *J* = 7.1 Hz, 2H), 4.11 (dd, *J* = 17.6, 11.5 Hz, 1H), 4.01 (dd, *J* = 32.3, 13.0 Hz, 2H), 1.27 (t, *J* = 7.1 Hz, 3H).

**<sup>13</sup>C NMR (151 MHz, CDCl<sub>3</sub>):** δ 188.8 (t, *J* = 30.2 Hz), 167.4, 136.3, 134.6, 131.9, 130.3 (t, *J* = 3.0 Hz), 129.4, 128.82, 128.77, 127.8, 116.9 (t, *J* = 259.7 Hz), 62.0, 49.1 (t, *J* = 24.2 Hz), 37.1, 14.1.

**<sup>19</sup>F NMR (565 MHz, CDCl<sub>3</sub>):** δ -99.8 (d, *J* = 271.2 Hz, 1F), -102.1 (d, *J* = 271.2 Hz, 1F).

**IR (neat):** 3063, 2924, 2581, 1735, 1580, 1392, 1324, 1117.

**HRMS (ESI-TOF):** calculated for [C<sub>19</sub>H<sub>18</sub>F<sub>2</sub>O<sub>3</sub>SNa (M + Na<sup>+</sup>): 387.0837, found: 387.0852.

### 3-(butylthio)-2,2-difluoro-1-phenyl-4-(pyrrolidin-1-yl)butane-1,4-dione (3au):

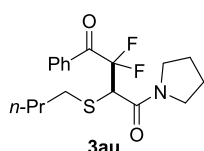

Following the general procedure B, the title compound was obtained as light yellow oil, 149 mg, 84% yield. (R<sub>f</sub> = 0.23, eluent: PE/EtOAc = 5/1).

**<sup>1</sup>H NMR (600 MHz, CDCl<sub>3</sub>):** δ 8.08 (d, *J* = 8.0 Hz, 2H), 7.62 – 7.58 (m, 1H), 7.50 – 7.44 (m, 2H), 4.29 (dd, *J* = 18.8, 9.9 Hz, 1H), 3.94 – 3.88 (m, 1H), 3.55 – 3.37 (m, 3H), 2.93 – 2.85 (m, 1H), 2.72 – 2.66 (m, 1H), 2.05 – 1.94 (m, 2H), 1.91 – 1.78 (m, 2H), 1.58 – 1.46 (m, 2H), 1.45 – 1.34 (m, 2H), 0.89 (t, *J* = 7.1 Hz, 3H).

**<sup>13</sup>C NMR (151 MHz, CDCl<sub>3</sub>):** δ 191.2 (t, *J* = 30.2 Hz), 164.6, 134.1, 132.8, 130.3 (t, *J* = 3.0 Hz), 128.6, 117.6 (t, *J* = 259.7 Hz), 49.4 (t, *J* = 24.2 Hz), 46.8, 46.2, 31.5, 31.12, 31.10, 26.3, 24.4, 21.9, 13.7.

**<sup>19</sup>F NMR (565 MHz, CDCl<sub>3</sub>):** δ -97.8 (d, *J* = 271.2 Hz, 1F), -105.8 (d, *J* = 271.2 Hz, 1F).

**IR (neat):** 2930, 2873, 1598, 1447, 1338, 1227, 1118, 970.

**HRMS (ESI-TOF):** calculated for [C<sub>18</sub>H<sub>23</sub>F<sub>2</sub>NO<sub>2</sub>SNa (M + Na<sup>+</sup>): 378.1310, found: 378.1324.

### 3-(benzylthio)-2,2-difluoro-1-phenyl-4-(pyrrolidin-1-yl)butane-1,4-dione (3av):

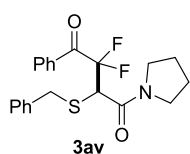

Following the general procedure B, the title compound was obtained as light yellow oil, 140 mg, 72% yield. (R<sub>f</sub> = 0.25, eluent: PE/EtOAc = 3/1).

**<sup>1</sup>H NMR (600 MHz, CDCl<sub>3</sub>):** δ 8.11 (d, *J* = 8.1 Hz, 2H), 7.64 – 7.57 (m, 1H), 7.51 – 7.46 (m, 2H), 7.36 – 7.29 (m, 4H), 7.27 – 7.23 (m, 1H), 4.26 (dd, *J* = 17.9, 10.0 Hz, 1H),

3.97 (dd,  $J = 83.9, 13.4$  Hz, 2H), 3.38 – 3.26 (m, 2H), 3.24 – 3.08 (m, 2H), 1.84 – 1.64 (m, 4H).

**$^{13}\text{C}$  NMR (151 MHz,  $\text{CDCl}_3$ ):**  $\delta$  190.1 (t,  $J = 30.2$  Hz), 164.2, 137.4, 134.2, 132.7, 130.3 (t,  $J = 3.0$  Hz), 129.4, 128.62, 128.61, 127.5, 117.8 (t,  $J = 259.7$  Hz), 48.5 (t,  $J = 24.2$  Hz), 46.2, 46.0, 35.9, 26.0, 24.2.

**$^{19}\text{F}$  NMR (565 MHz,  $\text{CDCl}_3$ ):**  $\delta$  -97.8 (d,  $J = 271.2$  Hz, 1F), -105.8 (d,  $J = 271.2$  Hz, 1F).

**IR (neat):** 3059, 2974, 2363, 1697, 1571, 1088, 879, 836.

**HRMS (ESI-TOF):** calculated for  $[\text{C}_{21}\text{H}_{21}\text{F}_2\text{NO}_2\text{SNa} (\text{M} + \text{Na}^+)]$ : 412.1153, found: 412.1168.

**2-(benzhydrylthio)-3,3-difluoro-4-oxo-4-phenylbutanenitrile (3aw):**

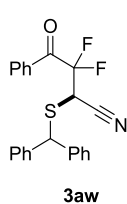

Following the general procedure A, the title compound was obtained as light yellow oil, 106 mg, 54% yield. ( $R_f = 0.41$ , eluent: PE/EtOAc = 10/1).

**$^1\text{H}$  NMR (600 MHz,  $\text{CDCl}_3$ ):**  $\delta$  8.03 (d,  $J = 7.8$  Hz, 2H), 7.66 – 7.62 (m, 1H), 7.55 – 7.47 (m, 6H), 7.41 – 7.37 (m, 4H), 7.35 – 7.31 (m, 2H), 5.15 (dd,  $J = 18.1, 18.1$  Hz, 1H).

**$^{13}\text{C}$  NMR (151 MHz,  $\text{CDCl}_3$ ):**  $\delta$  190.0 (t,  $J = 30.2$  Hz), 136.4, 134.1, 132.9, 130.2, 129.9 (t,  $J = 3.0$  Hz), 129.8, 128.7, 127.6, 119.1 (t,  $J = 259.7$  Hz), 55.0 (t,  $J = 24.2$  Hz).

**$^{19}\text{F}$  NMR (565 MHz,  $\text{CDCl}_3$ ):**  $\delta$  -97.8 (d,  $J = 271.2$  Hz, 1F), -105.8 (d,  $J = 271.2$  Hz, 1F).

**IR (neat):** 3055, 2972, 2231, 2130, 1700, 1581, 1379, 1001, 830.

**HRMS (ESI-TOF):** calculated for  $[\text{C}_{23}\text{H}_{18}\text{F}_2\text{NOS} (\text{M} + \text{H}^+)]$ : 394.1072, found: 394.1077

**(1R,2S,5R)-2-isopropyl-5-methylcyclohexyl(2-(butylthio)-3,3-difluoro-4-oxo-4-phenylbutanoate (XX):**

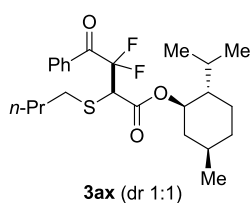

Following the general procedure B, the title compound was obtained as the mixture of two diastereoisomers (dr 1:1), light yellow oil, 167 mg, 76% yield. ( $R_f = 0.32$ , eluent: PE/EtOAc = 10/1).

**$^1\text{H}$  NMR (600 MHz,  $\text{CDCl}_3$ ):**  $\delta$  8.15 – 8.05 (m, 2H), 7.65 – 7.61 (m, 1H), 7.52 – 7.47 (m, 2H), 4.77 – 4.70 (m, 1H), 4.18 – 4.10 (m, 1H), 2.91 – 2.66 (m, 2H), 2.11 – 1.86 (m, 2H), 1.70 – 1.56 (m, 4H), 1.51 – 1.35 (m, 4H), 1.07 – 0.83 (m, 12H), 0.79 – 0.73 (m, 3H).

**$^{13}\text{C}$  NMR (151 MHz,  $\text{CDCl}_3$ ):**  $\delta$  189.11 (t,  $J = 30.2$  Hz), 189.08 (t,  $J = 30.2$  Hz), 167.3, 167.2, 134.6, 134.5, 132.1, 132.0, 130.31, 130.25, 128.81, 128.80, 116.9 (t,  $J = 259.7$  Hz), 116.8 (t,  $J = 259.7$  Hz), 76.12, 76.08, 50.21 (t,  $J = 24.2$  Hz), 50.15 (t,  $J = 24.2$  Hz), 47.1, 47.0, 40.5, 40.4, 34.3,

32.9, 31.5, 31.3, 26.1, 25.8, 23.4, 23.1, 22.1, 21.9, 21.8, 20.9, 20.8, 16.2, 15.9, 13.73, 13.70.

**<sup>19</sup>F NMR (565 MHz, CDCl<sub>3</sub>):** δ -100.2 (d, *J* = 271.2 Hz, 1F), -100.7 (d, *J* = 271.2 Hz, 1F), -102.3 (d, *J* = 271.2 Hz, 1F), -102.8 (d, *J* = 271.2 Hz, 1F).

**IR (neat):** 2928, 2204, 1980, 1731, 1581, 1369, 1078, 847.

**HRMS (ESI-TOF):** calculated for [C<sub>24</sub>H<sub>34</sub>F<sub>2</sub>O<sub>3</sub>SNa (M + Na<sup>+</sup>): 463.2089, found: 463.2102.

**3-(butylthio)-2,2-difluoro-4-((S)-4-isopropyl-2-oxooxazolidin-3-yl)-1-phenylbutane-1,4-dione (3ay):**

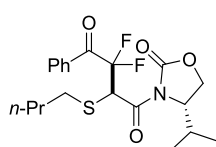

**3ay** (dr 1:1)

Following the general procedure B, two single diastereoisomers were obtained, total amount 97.1 mg, 47% yield.

**Diastereoisomer 1:** light yellow oil, 47.5 mg, 23% (*R<sub>f</sub>* = 0.31, eluent:

PE/EtOAc = 3/1). **<sup>1</sup>H NMR (600 MHz, CDCl<sub>3</sub>):** δ 8.12 (d, *J* = 7.6 Hz, 2H),

7.66 – 7.62 (m, 1H), 7.52 – 7.48 (m, 2H), 5.77 (dd, *J* = 20.7, 9.1 Hz, 1H), 4.47 – 4.41 (m, 1H),

4.36 – 4.32 (m, 1H), 4.30 – 4.27 (m, 1H), 2.99 – 2.77 (m, 2H), 2.48 – 2.31 (m, 1H), 1.63 – 1.50 (m,

2H), 1.44 – 1.37 (dd, *J* = 14.9, 7.5 Hz, 2H), 1.03 (d, *J* = 6.9 Hz, 3H), 0.95 – 0.87 (m, 6H). **<sup>13</sup>C**

**NMR (151 MHz, CDCl<sub>3</sub>):** δ 188.7, 166.4, 153.7, 134.8, 130.4, 130.2, 128.6, 117.5 (t, *J* = 259.7

Hz), 63.4, 59.1, 47.3 (t, *J* = 24.2 Hz), 32.9, 31.5, 28.4, 21.9, 18.1, 14.6, 13.7. **<sup>19</sup>F NMR (565 MHz,**

**CDCl<sub>3</sub>):** δ -96.9 (d, *J* = 271.2 Hz, 1F), -101.0 (d, *J* = 271.2 Hz, 1F). **IR (neat):** 2962, 2874, 1773,

1580, 1465, 1026, 975, 853. **HRMS (ESI-TOF):** calculated for [C<sub>20</sub>H<sub>25</sub>F<sub>2</sub>NO<sub>4</sub>SNa (M + Na<sup>+</sup>):

436.1365, found: 436.1375

**Diastereoisomer 2:** light yellow oil, 49.6 mg, 24% (*R<sub>f</sub>* = 0.25, eluent: PE/EtOAc = 3/1). **<sup>1</sup>H NMR**

**(600 MHz, CDCl<sub>3</sub>):** δ 8.11 (d, *J* = 6.3 Hz, 2H), 7.66 – 7.62 (m, 1H), 7.52 – 7.49 (m, 2H), 5.78 (dd,

*J* = 20.7, 9.1 Hz, 1H), 4.54 – 4.52 (m, 1H), 4.40 (t, *J* = 8.6 Hz, 1H), 4.28 (dd, *J* = 9.1, 2.6 Hz, 1H),

2.99 – 2.80 (m, 2H), 2.38 – 2.33 (m, 1H), 1.65 – 1.55 (m, 2H), 1.45 – 1.38 (m, 2H), 0.95 (d, *J* =

6.9 Hz, 3H), 0.93 – 0.89 (m, 6H). **<sup>13</sup>C NMR (151 MHz, CDCl<sub>3</sub>):** δ 188.8, 166.8, 153.7, 134.9,

130.5, 130.3, 128.9, 119.1 (t, *J* = 259.7 Hz), 63.5, 58.3, 47.5 (m), 32.8, 31.5, 28.5, 22.0, 17.9, 14.9,

13.7. **<sup>19</sup>F NMR (565 MHz, CDCl<sub>3</sub>):** δ -97.1 (d, *J* = 271.2 Hz, 1F), -101.2 (d, *J* = 271.2 Hz, 1F).

**IR (neat):** 2962, 2874, 1773, 1580, 1465, 1026, 975, 853. **HRMS (ESI-TOF):** calculated for

[C<sub>20</sub>H<sub>25</sub>F<sub>2</sub>NO<sub>4</sub>SNa (M + Na<sup>+</sup>): 436.1365, found: 436.1375

### 2-(1,3-dithian-2-yl)-2,2-difluoro-1-phenylethan-1-one (**3az**):

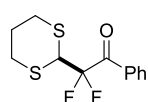

Following the general procedure A, the title compound was obtained as light yellow oil, 99 mg, 72% yield. (*R*<sub>f</sub> = 0.36, eluent: PE/EtOAc = 10/1).

**<sup>1</sup>H NMR (600 MHz, CDCl<sub>3</sub>):** δ 8.03 (d, *J* = 8.1 Hz, 2H), 7.66 – 7.62 (m, 1H), 7.53 – 7.48 (m, 2H), 4.21 (t, *J* = 16.6 Hz, 1H), 3.26 – 3.08 (m, 2H), 2.54 (d, *J* = 14.0 Hz, 2H), 2.19 – 2.13 (m, 1H), 2.06 – 1.92 (m, 1H).

**<sup>13</sup>C NMR (151 MHz, CDCl<sub>3</sub>):** δ 189.7 (t, *J* = 30.2 Hz), 134.3, 133.0, 129.8 (t, *J* = 3.0 Hz), 128.9, 119.7 (t, *J* = 261.2 Hz), 40.4 (t, *J* = 24.2 Hz), 25.6, 24.4.

**<sup>19</sup>F NMR (565 MHz, CDCl<sub>3</sub>):** δ -96.4.

**IR (neat):** 1701, 1597, 1448, 1174, 1045, 918, 693, 648.

**HRMS (ESI-TOF):** calculated for [C<sub>12</sub>H<sub>12</sub>F<sub>2</sub>OS<sub>2</sub>Na (M + Na<sup>+</sup>): 297.0190, found: 297.0209.

### 2,2-difluoro-3-(methylthio)-1-phenylpropan-1-one (**3aa'**):

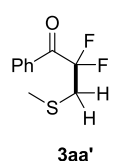

Following the general procedure A, the title compound was obtained as light yellow oil, 17.2 mg, 16% yield. (*R*<sub>f</sub> = 0.35, eluent: PE/EtOAc = 50/1). <sup>19</sup>F-NMR analysis indicated that **3aa'** was obtained in 64% NMR yield. The isolated yield is only 16% is

because of the high volatility of the title compound.

**<sup>1</sup>H NMR (600 MHz, CDCl<sub>3</sub>):** δ 8.11 (d, *J* = 7.6 Hz, 2H), 7.66 – 7.62 (m, 1H), 7.52 – 7.48 (m, 2H), 3.24 (t, *J* = 15.5 Hz, 2H), 2.23 (s, 3H).

**<sup>13</sup>C NMR (151 MHz, CDCl<sub>3</sub>):** δ 189.1 (t, *J* = 30.2 Hz), 134.5, 132.2, 130.2 (t, *J* = 3.0 Hz), 128.8, 118.9 (t, *J* = 259.7 Hz), 37.2 (t, *J* = 24.2 Hz), 17.6.

**<sup>19</sup>F NMR (565 MHz, CDCl<sub>3</sub>):** δ -97.5.

**IR (neat):**

**HRMS (ESI-TOF):** calculated for [C<sub>10</sub>H<sub>10</sub>F<sub>2</sub>OSNa (M + Na<sup>+</sup>): 239.0313, found: 239.0319.

### 2,2-difluoro-3-(hexylthio)-1-phenyloctan-1-one (**3ab'**):

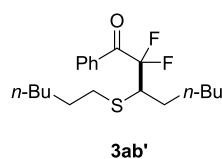

Following the general procedure A, the title compound was obtained as light yellow oil, 41 mg, 23% yield. (*R*<sub>f</sub> = 0.35, eluent: PE/EtOAc = 50/1).

<sup>19</sup>F-NMR analysis indicated that **3ab'** was obtained in 43% NMR yield. The isolated yield is only 23% is because of the high volatility of the title compound.

**<sup>1</sup>H NMR (600 MHz, CDCl<sub>3</sub>):** δ 8.08 (d, *J* = 7.6 Hz, 2H), 7.66 – 7.62 (m, 1H), 7.52 – 7.48 (m, 2H), 3.27 – 3.17 (m, 1H), 2.57 – 2.43 (m, 2H), 1.93 – 1.85 (m, 1H), 1.83 – 1.67 (m, 1H), 1.59 – 1.39 (m, 4H), 1.38 – 1.17 (m, 10H), 0.93 – 0.83 (m, 6H).

**<sup>13</sup>C NMR (151 MHz, CDCl<sub>3</sub>):** δ 190.6 (t, *J* = 30.2 Hz), 134.1, 133.5, 130.1 (t, *J* = 3.0 Hz), 128.8, 119.5 (t, *J* = 259.7 Hz), 48.4 (t, *J* = 24.2 Hz), 32.4, 31.6, 31.5, 29.4, 28.5, 27.8, 26.5, 22.63, 22.62, 14.14, 14.13.

**<sup>19</sup>F NMR (565 MHz, CDCl<sub>3</sub>):** δ -96.3 (d, *J* = 271.2 Hz, 1F), -107.3 (d, *J* = 271.2 Hz, 1F).

**IR (neat):** 2926, 1701, 1598, 1448, 1183, 1037, 714, 687.

**HRMS (ESI-TOF):** calculated for [C<sub>20</sub>H<sub>30</sub>F<sub>2</sub>OS (M + H<sup>+</sup>): 357.2058, found: 357.2068.

#### 7-bromo-3-((5-bromopentyl)thio)-2,2-difluoro-1-phenylheptan-1-one (3ac')

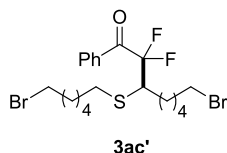

Following the general procedure A, the title compound was obtained as light yellow oil, 124 mg, 51% yield. (*R*<sub>f</sub> = 0.29, eluent: PE/EtOAc = 50/1).

**<sup>1</sup>H NMR (600 MHz, CDCl<sub>3</sub>):** δ 8.07 (d, *J* = 7.6 Hz, 2H), 7.66 – 7.61 (m, 1H), 7.52 – 7.48 (m, 2H), 3.43 (t, *J* = 6.8 Hz, 2H), 3.38 (t, *J* = 6.8 Hz, 2H), 3.26 – 3.17 (m, 1H), 2.61 – 2.54 (m, 1H), 2.52 – 2.46 (m, 1H), 1.96 – 1.75 (m, 7H), 1.55 – 1.30 (m, 9H).

**<sup>13</sup>C NMR (151 MHz, CDCl<sub>3</sub>):** δ 190.6 (t, *J* = 30.2 Hz), 134.2, 133.3, 130.1 (t, *J* = 3.0 Hz), 128.8, 119.5 (t, *J* = 259.7 Hz), 48.3 (t, *J* = 24.2 Hz), 33.8, 32.6, 32.5, 32.3, 32.1, 29.1, 29.0, 27.9, 27.8, 27.7, 25.9.

**<sup>19</sup>F NMR (565 MHz, CDCl<sub>3</sub>):** δ -96.3 (d, *J* = 271.2 Hz, 1F), -107.0 (d, *J* = 271.2 Hz, 1F).

**IR (neat):** 2930, 1701, 1597, 1448, 1182, 1025, 714, 658.

The title compound was detected by LC/TOF-MS with ESI and APCI sources, unfortunately the expected MS was not found.

#### 2,2-difluoro-3-(phenethylthio)-1,4-diphenylbutan-1-one (3ad')

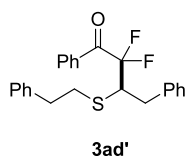

Following the general procedure A, the title compound was obtained as light yellow oil, 142.7 mg, 72% yield. (*R*<sub>f</sub> = 0.30, eluent: PE/EtOAc = 50/1).

**<sup>1</sup>H NMR (600 MHz, CDCl<sub>3</sub>):** δ 8.08 (d, *J* = 7.6 Hz, 2H), 7.66 – 7.62 (m, 1H), 7.52 – 7.48 (m, 2H), 7.36 – 7.31 (m, 4H), 7.29 – 7.26 (m, 1H), 7.23 – 7.19 (m, 2H), 7.18 – 7.14 (m, 1H), 6.94 (d, *J* = 7.2 Hz, 2H), 3.62 – 3.48 (m, 1H), 3.38 (dd, *J* = 14.0, 3.0 Hz, 1H), 2.79 (dd, *J* =



14.0, 11.3 Hz, 1H), 2.51 – 2.39 (m, 4H).

**<sup>13</sup>C NMR (151 MHz, CDCl<sub>3</sub>):** δ 190.3 (t, *J* = 30.2 Hz), 140.1, 138.0, 134.2, 133.4, 130.2 (t, *J* = 3.0 Hz), 129.8, 128.8, 128.6, 128.47, 128.45, 127.0, 126.4, 119.1 (t, *J* = 259.7 Hz), 51.0 (t, *J* = 24.2 Hz), 35.6, 34.8, 34.4.

**<sup>19</sup>F NMR (565 MHz, CDCl<sub>3</sub>):** δ -95.6 (d, *J* = 271.2 Hz, 1F), -107.6 (d, *J* = 271.2 Hz, 1F).

**IR (neat):** 3027, 1696, 1448, 1183, 1029, 715, 695, 659.

**HRMS (ESI-TOF):** calculated for [C<sub>24</sub>H<sub>22</sub>F<sub>2</sub>OSNa (M + Na<sup>+</sup>): 419.1252, found: 419.1266.

**2,2-difluoro-1-phenyl-2-(tetrahydrothiophen-2-yl)ethan-1-one (3ae')**:

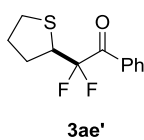

Following the general procedure A, the title compound was obtained as light yellow oil, 11 mg, 9% yield. (*R*<sub>f</sub> = 0.33, eluent: PE/EtOAc = 40/1). <sup>19</sup>F-NMR analysis indicated that **3ae'** was obtained in 59% NMR yield. The isolated yield is

only 9% is because of the high volatility of the title compound.

**<sup>1</sup>H NMR (600 MHz, CDCl<sub>3</sub>):** δ 8.08 (d, *J* = 7.6 Hz, 2H), 7.66 – 7.62 (m, 1H), 7.52 – 7.48 (m, 2H), 4.22 – 4.12 (m, 1H), 2.93 – 2.83 (m, 2H), 2.26 – 2.11 (m, 3H), 2.06 – 2.00 (m, 1H).

**<sup>13</sup>C NMR (151 MHz, CDCl<sub>3</sub>):** δ 189.5 (t, *J* = 30.2 Hz), 134.5, 133.3, 130.3 (t, *J* = 3.0 Hz), 128.8, 119.0 (t, *J* = 259.7 Hz), 49.3 (t, *J* = 24.2 Hz), 33.1, 31.2, 30.1.

**<sup>19</sup>F NMR (565 MHz, CDCl<sub>3</sub>):** δ -100.8 (d, *J* = 271.2 Hz, 1F), -106.2 (d, *J* = 271.2 Hz, 1F).

**IR (neat):** 3063, 2872, 2231, 1700, 1580, 1379, 1001, 830.

**HRMS (ESI-TOF):** calculated for [C<sub>12</sub>H<sub>12</sub>F<sub>2</sub>OS (M + Na<sup>+</sup>): 265.0469, found: 265.0484.

**2,2-difluoro-1-phenyl-2-(4-tosylthiomorpholin-2-yl)ethan-1-one (3af')**:

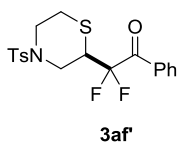

Following the general procedure A, the title compound was obtained as light yellow oil, 156.3 mg, 76% yield. (*R*<sub>f</sub> = 0.41, eluent: PE/EtOAc = 10/1).

**<sup>1</sup>H NMR (600 MHz, CDCl<sub>3</sub>):** δ 8.07 (d, *J* = 7.9 Hz, 2H), 7.67 – 7.61 (m, 3H), 7.49 (t, *J* = 7.9 Hz, 2H), 7.51 – 7.47 (m, 2H), 3.72 – 3.57 (m, 3H), 3.39 – 3.30 (m, 2H), 2.96 – 2.89 (m, 1H), 2.67 – 2.57 (m, 1H), 2.41 (s, 3H).

**<sup>13</sup>C NMR (151 MHz, CDCl<sub>3</sub>):** δ 188.3 (t, *J* = 30.2 Hz), 144.1, 134.7, 133.8, 132.0, 130.2, 130.0, 128.8, 127.5, 118.2 (t, *J* = 259.7 Hz), 47.0, 45.8, 40.2 (t, *J* = 24.2 Hz), 26.3, 21.6.

**<sup>19</sup>F NMR (565 MHz, CDCl<sub>3</sub>):** δ -97.7 (d, *J* = 282.5 Hz, 1F), -104.8 (d, *J* = 282.5 Hz, 1F).

**IR (neat):** 1696, 1596, 1449, 1338, 1155, 1045, 712, 547.

**HRMS (ESI-TOF):** calculated for [C<sub>19</sub>H<sub>19</sub>F<sub>2</sub>NO<sub>3</sub>S<sub>2</sub>Na (M + Na<sup>+</sup>): 434.0667, found: 434.0689.

**tert-butyl 2-(1,1-difluoro-2-oxo-2-phenylethyl)thiomorpholine-4-carboxylate (3ag’):**

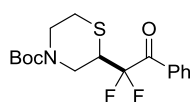

**3ag’**

Following the general procedure A, the title compound was obtained as light yellow oil, 100 mg, 56% yield. (R<sub>f</sub> = 0.62, eluent: PE/EtOAc = 10/1).

**<sup>1</sup>H NMR (600 MHz, CDCl<sub>3</sub>):** δ ) δ 8.07 (d, *J* = 7.7 Hz, 2H), 7.63 (d, *J* = 5.8 Hz, 1H), 7.50 (d, *J* = 6.8 Hz, 2H), 4.60 – 3.90 (m, 2H), 3.75 – 3.20 (m, 3H), 3.05 – 2.85 (m, 1H), 2.40 – 2.30 (m, 1H), 1.39 (s, 9H).

**<sup>13</sup>C NMR (151 MHz, CDCl<sub>3</sub>):** δ 189.1 (t, *J* = 30.2 Hz), 154.2, 134.5, 132.5, 130.2, 128.8, 117.6 (t, *J* = 259.7 Hz), 80.4, 44.6, 44.2, 37.5 (t, *J* = 24.2 Hz), 28.3, 24.8.

**<sup>19</sup>F NMR (565 MHz, CDCl<sub>3</sub>):** δ -95.7 (d, *J* = 282.5 Hz, 1F), -104.9 (d, *J* = 282.5 Hz, 1F).

**IR (neat):** 3006, 2854, 1702, 1579, 1206, 965, 825, 771.

**HRMS (ESI-TOF):** calculated for [C<sub>17</sub>H<sub>21</sub>F<sub>2</sub>NO<sub>3</sub>SNa (M + Na<sup>+</sup>): 380.1102, found: 380.1121.

**2,2-difluoro-2-(1,4-oxathian-3-yl)-1-phenylethan-1-one (3ah’):**

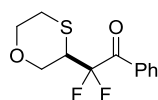

**3ah’**

Following the general procedure A, the title compound was obtained as light yellow oil, 71.2 mg, 55% yield. (R<sub>f</sub> = 0.30, eluent: PE/EtOAc = 10/1).

**<sup>1</sup>H NMR (600 MHz, CDCl<sub>3</sub>):** δ 8.10 (d, *J* = 7.5 Hz, 2H), 7.68 – 7.63 (m, 1H), 7.54 – 7.49 (m, 2H), 4.39 (dd, *J* = 12.6, 3.7 Hz, 1H), 4.09 – 4.03 (m, 2H), 3.85 – 3.79 (m, 1H), 3.43 – 3.35 (m, 1H), 3.07 – 3.00 (m, 1H), 2.36 (d, *J* = 13.7 Hz, 1H).

**<sup>13</sup>C NMR (151 MHz, CDCl<sub>3</sub>):** δ 189.2 (t, *J* = 30.2 Hz), 134.5, 132.5, 130.2, 128.8, 119.2 (t, *J* = 259.7 Hz), 68.2, 66.3, 37.6 (t, *J* = 24.2 Hz), 25.0.

**<sup>19</sup>F NMR (565 MHz, CDCl<sub>3</sub>):** δ -95.9 (d, *J* = 282.5 Hz, 1F), -104.6 (d, *J* = 282.5 Hz, 1F).

**IR (neat):** 1697, 1596, 1448, 1183, 1097, 1039, 875, 686.

**HRMS (ESI-TOF):** calculated for [C<sub>12</sub>H<sub>12</sub>F<sub>2</sub>O<sub>2</sub>SNa (M + Na<sup>+</sup>): 281.0418, found: 281.0434.

**2-(1,1-difluoro-2-oxo-2-phenylethyl)tetrahydro-4H-thiopyran-4-one (3ai’):**

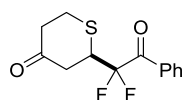

**3ai’**

Following the general procedure A, the title compound was obtained as light yellow oil, 82.4 mg, 61% yield. (R<sub>f</sub> = 0.54, eluent: PE/EtOAc = 20/1).

**<sup>1</sup>H NMR (600 MHz, CDCl<sub>3</sub>):** δ 8.05 (d, *J* = 7.6 Hz, 2H), 7.69 – 7.61 (m, 1H), 7.55 – 7.46 (m, 2H), 4.10 – 3.98 (m, 1H), 3.26 – 3.18 (m, 1H), 2.99 (dd, *J* = 15.0, 5.3 Hz, 1H), 2.90 – 2.78 (m, 2H), 2.77 – 2.67 (m, 2H).

**<sup>13</sup>C NMR (151 MHz, CDCl<sub>3</sub>):** δ 205.6, 188.4 (t, *J* = 30.2 Hz), 134.7, 132.3, 130.1 (t, *J* = 3.0 Hz), 128.9, 119.0 (t, *J* = 261.2 Hz), 43.5 (t, *J* = 24.2 Hz), 42.3, 40.0, 26.8.

**<sup>19</sup>F NMR (565 MHz, CDCl<sub>3</sub>):** δ -95.0 (d, *J* = 276.9 Hz, 1F), -106.3 (d, *J* = 276.9 Hz, 1F).

**IR (neat):** 3373, 2850, 1718, 1596, 1336, 1109, 847, 791.

**HRMS (ESI-TOF):** calculated for [C<sub>13</sub>H<sub>12</sub>F<sub>2</sub>O<sub>2</sub>SNa (M + Na<sup>+</sup>): 293.0418, found: 293.0432.

### 2,2-difluoro-3-(heptylthio)-1-phenylpropan-1-one (3aj<sup>o</sup>):

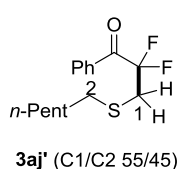

Following the general procedure A, the title compound was obtained as light yellow oil, 64.5 mg, 43% yield. (*R*<sub>f</sub> = 0.30, eluent: PE/EtOAc = 50/1).

**<sup>1</sup>H NMR (600 MHz, CDCl<sub>3</sub>):** δ 8.22 – 8.04 (m, 2H), 7.66 – 7.60 (m, 1H), 7.52 – 7.48 (m, 2H), 3.25 (t, *J* = 15.6 Hz, 1H), 2.63 (t, *J* = 7.4 Hz, 1H), 2.06 (s, 1.62H), 1.94 – 1.85 (m, 0.65H), 1.73 – 1.67 (m, 0.74H), 1.67 – 1.53 (m, 3.31H), 1.39 – 1.22 (m, 4H), 0.93 – 0.86 (m, 3H).

**<sup>13</sup>C NMR (151 MHz, CDCl<sub>3</sub>):** δ 190.4 (t, *J* = 30.2 Hz), 189.2 (t, *J* = 30.2 Hz), 134.5, 134.1, 130.2 (t, *J* = 3.0 Hz), 129.9 (t, *J* = 3.0 Hz), 128.8, 128.7, 120.3, 117.9 (t, *J* = 259.7 Hz), 48.6, 35.0 (t, *J* = 25.7 Hz), 33.8, 31.5, 31.4, 31.3, 29.4, 28.5, 26.4, 26.3, 22.64, 22.61, 14.3, 14.2.

**<sup>19</sup>F NMR (565 MHz, CDCl<sub>3</sub>):** δ -95.2 (d, *J* = 271.2 Hz, 1F, C2), -97.6 (s, 2F, C1), -107.9 (d, *J* = 271.2 Hz, 1F, C2).

**IR (neat):** 2922, 1698, 1597, 1449, 1137, 1060, 863, 684.

The title compound was detected by LC/TOF-MS with ESI and APCI sources, unfortunately the expected MS was not found.

### 2,2-difluoro-3-(hexylthio)-4-methyl-1-phenylpentan-1-one (3ak<sup>o</sup>):

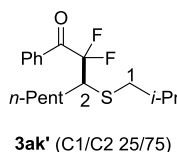

Following the general procedure A, the title compound was obtained as light yellow oil, 65.8 mg, 40% yield. (*R*<sub>f</sub> = 0.30, eluent: PE/EtOAc = 50/1).

**<sup>1</sup>H NMR (600 MHz, CDCl<sub>3</sub>):** δ 8.06 (d, *J* = 7.7 Hz, 2H), 7.63 – 7.60 (m, 1H), 7.49 (t, *J* = 7.8 Hz, 2H), 3.28 – 3.16 (m, 1H), 2.48 – 2.43 (m, 1H), 2.36 – 2.32 (m, 1H), 1.91 – 1.86 (m, 0.76H), 1.75 – 1.66 (m, 1.56H), 1.63 – 1.53 (m, 1.11H), 1.51 – 1.39 (m, 1.33H), 1.40 –

1.27 (m, 3.79H), 1.14 (d,  $J = 6.7$  Hz, 0.79H), 1.05 (d,  $J = 6.6$  Hz, 0.81H), 0.94 – 0.84 (m, 7.70H).

**$^{13}\text{C}$  NMR (151 MHz,  $\text{CDCl}_3$ ):**  $\delta$  190.6 (t,  $J = 30.2$  Hz), 134.1, 134.0, 133.5, 130.1, 130.0 (t,  $J = 3.0$  Hz), 128.8, 128.7, 120.0, 119.5 (t,  $J = 259.7$  Hz), 54.6, 48.7 (t,  $J = 25.7$  Hz), 41.4, 34.7, 31.6, 31.5, 29.8, 29.4, 28.6, 28.5, 27.8, 27.6, 22.6, 22.2, 21.9, 21.8, 18.6, 14.2.

**$^{19}\text{F}$  NMR (565 MHz,  $\text{CDCl}_3$ ):**  $\delta$  -93.9 (d,  $J = 271.2$  Hz, 1F, C1), -96.3 (d,  $J = 271.2$  Hz, 1F, C2), -106.4 (d,  $J = 271.2$  Hz, 1F, C1), -107.3 (d,  $J = 271.2$  Hz, 1F, C2)

**IR (neat):** 2953, 2932, 2858, 1703, 1596, 1578, 1468, 1447, 1263, 1037, 1031, 921.

The title compound was detected by LC/TOF-MS with ESI and APCI sources, unfortunately the expected MS was not found.

#### 2,2-difluoro-2-(hexylthio)-1-phenylethan-1-one (4):

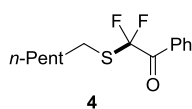

Following the general procedure A, the title compound was obtained as light yellow oil, 85.7 mg, 63% yield. ( $R_f = 0.56$ , eluent: PE/EtOAc = 20/1).

**$^1\text{H}$  NMR (600 MHz,  $\text{CDCl}_3$ ):**  $\delta$  8.14 (d,  $J = 7.6$  Hz, 2H), 7.68 – 7.62 (m, 1H), 7.50 (t,  $J = 7.6$  Hz, 2H), 2.89 (t,  $J = 7.4$  Hz, 2H), 1.77 – 1.61 (m, 2H), 1.44 – 1.35 (m, 2H), 1.33 – 1.27 (m, 4H), 0.88 (t,  $J = 6.3$  Hz, 3H).

**$^{13}\text{C}$  NMR (151 MHz,  $\text{CDCl}_3$ ):**  $\delta$  185.4 (t,  $J = 28.9$  Hz), 134.7, 131.2, 130.7, 128.8, 124.6 (t,  $J = 288.4$  Hz), 31.3, 29.7, 29.1, 28.5, 22.6, 14.1.

**$^{19}\text{F}$  NMR (565 MHz,  $\text{CDCl}_3$ ):**  $\delta$  -79.1 (s, 2F).

**IR (neat):** 2962, 2929, 2861, 1701, 1596, 1581, 1453, 1278, 1129, 888, 831.

The title compound was detected by LC/TOF-MS with ESI and APCI sources, unfortunately the expected MS was not found.

#### 3-(benzylthio)-2,2-difluoro-3-phenyl-1-(p-tolyl)propan-1-one (3ba):

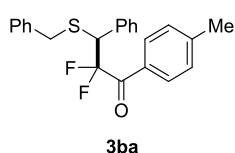

Following the general procedure A, the title compound was obtained as light yellow oil, 147.1 mg, 77% yield. ( $R_f = 0.35$ , eluent: PE/EtOAc = 40/1).

**$^1\text{H}$  NMR (600 MHz,  $\text{CDCl}_3$ ):**  $\delta$  7.85 (d,  $J = 8.1$  Hz, 2H), 7.37 – 7.31 (m, 5H), 7.29 – 7.20 (m, 7H), 4.44 (dd,  $J = 18.7, 13.1$  Hz, 1H), 3.73 (dd,  $J = 114.0, 13.2$  Hz, 2H), 2.45 (s, 3H)

**$^{13}\text{C}$  NMR (151 MHz,  $\text{CDCl}_3$ ):**  $\delta$  188.9 (t,  $J = 31.7$  Hz), 136.6, 134.3, 130.3, 130.1 (t,  $J = 3.0$  Hz),

129.9, 129.4, 129.3, 128.59, 128.57, 128.5, 127.4, 118.3 (t,  $J = 256.7$  Hz), 51.5 (t,  $J = 22.7$  Hz), 36.6, 21.9.

**$^{19}\text{F}$  NMR (565 MHz,  $\text{CDCl}_3$ ):**  $\delta$  -96.9 (d,  $J = 265.6$  Hz, 1F), -103.5 (d,  $J = 271.2$  Hz, 1F).

**IR (neat):** 3033, 2951, 1691, 1605, 1494, 1454, 1272, 1364, 1055, 710, 693.

**HRMS (ESI-TOF):** calculated for  $[\text{C}_{23}\text{H}_{20}\text{F}_2\text{OSNa} (\text{M} + \text{Na}^+)]$ : 405.1095, found: 405.1092.

### 3-(benzylthio)-1-(4-bromophenyl)-2,2-difluoro-3-phenylpropan-1-one (3ca):

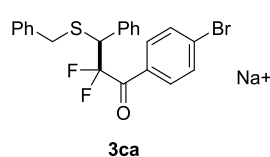

Following the general procedure A, the title compound was obtained as light yellow oil, 111.7 mg, 50% yield. ( $R_f = 0.33$ , eluent: PE/EtOAc = 40/1).

**$^1\text{H}$  NMR (600 MHz,  $\text{CDCl}_3$ ):**  $\delta$  7.90 (d,  $J = 8.1$  Hz, 2H), 7.61 (d,  $J = 7.9$  Hz, 2H), 7.37 – 7.31 (m, 5H), 7.27 – 7.23 (m, 3H), 7.21 – 7.18 (m, 2H), 4.44 (dd,  $J = 18.7, 13.1$  Hz, 1H), 3.73 (dd,  $J = 114.0, 13.2$  Hz, 2H).

**$^{13}\text{C}$  NMR (151 MHz,  $\text{CDCl}_3$ ):**  $\delta$  189.7 (t,  $J = 31.7$  Hz), 148.8, 136.6, 133.6, 132.9, 130.0, 129.3, 128.7 (t,  $J = 3.0$  Hz), 128.60, 128.59, 128.5, 127.5, 118.3 (t,  $J = 256.7$  Hz), 51.3 (t,  $J = 22.7$  Hz), 36.7.

**$^{19}\text{F}$  NMR (565 MHz,  $\text{CDCl}_3$ ):**  $\delta$  -95.4 (d,  $J = 265.6$  Hz, 1F), -104.2 (d,  $J = 271.2$  Hz, 1F).

**IR (neat):** 3027, 1687, 1448, 1265, 1167, 1058, 918, 695, 683.

**HRMS (ESI-TOF):** calculated for  $[\text{C}_{22}\text{H}_{17}\text{BrF}_2\text{OSNa} (\text{M} + \text{Na}^+)]$ : 469.0044, found: 469.0052.

### 3-(benzylthio)-2,2-difluoro-3-phenyl-1-(thiophen-2-yl)propan-1-one (3da):

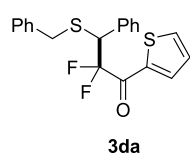

Following the general procedure A, the title compound was obtained as light yellow oil, 106.7 mg, 57% yield. ( $R_f = 0.26$ , eluent: PE/EtOAc = 40/1).

**$^1\text{H}$  NMR (600 MHz,  $\text{CDCl}_3$ ):**  $\delta$  7.88 (d,  $J = 2.9$  Hz, 1H), 7.78 (d,  $J = 4.9$  Hz, 1H), 7.36 – 7.27 (m, 8H), 7.25 – 7.21 (m, 2H), 7.15 – 7.13 (m, 1H), 4.41 (dd,  $J = 19.2, 12.8$  Hz, 1H), 3.82 (d,  $J = 13.2$  Hz, 1H), 3.65 (d,  $J = 13.2$  Hz, 1H).

**$^{13}\text{C}$  NMR (151 MHz,  $\text{CDCl}_3$ ):**  $\delta$  182.5 (t,  $J = 31.7$  Hz), 138.9, 136.6, 136.5, 135.9, 134.2, 129.9, 129.3, 128.8, 128.63, 128.60, 128.59, 118.1 (t,  $J = 256.7$  Hz), 51.3 (t,  $J = 22.7$  Hz), 36.7.

**$^{19}\text{F}$  NMR (565 MHz,  $\text{CDCl}_3$ ):**  $\delta$  -98.1 (d,  $J = 265.6$  Hz, 1F), -105.5 (d,  $J = 271.2$  Hz, 1F).

**IR (neat):** 3101, 1662, 1514, 1493, 1409, 1166, 1049, 692.

**HRMS (ESI-TOF):** calculated for [C<sub>20</sub>H<sub>16</sub>F<sub>2</sub>OS<sub>2</sub>Na (M + Na<sup>+</sup>): 397.0503, found: 397.0501.

**3-(benzylthio)-2,2-difluoro-1-(naphthalen-1-yl)-3-phenylpropan-1-one (3ea):**

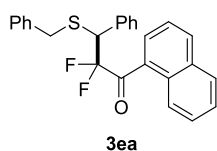

Following the general procedure A, the title compound was obtained as light yellow oil, 148.4 mg, 71% yield. (R<sub>f</sub> = 0.30, eluent: PE/EtOAc = 40/1).

**<sup>1</sup>H NMR (600 MHz, CDCl<sub>3</sub>):** δ 8.12 – 8.08 (m, 1H), 8.04 (d, *J* = 8.2 Hz, 1H), 7.93 – 7.84 (m, 2H), 7.58 – 7.55 (m, 2H), 7.47 – 7.45 (m, 1H), 7.39 – 7.32 (m, 5H), 7.26 – 7.22 (m, 3H), 7.16 – 7.12 (m, 2H), 4.56 (dd, *J* = 20.3, 11.7 Hz, 1H), 3.80 (d, *J* = 13.4 Hz, 1H), 3.61 (d, *J* = 13.2 Hz, 1H).

**<sup>13</sup>C NMR (151 MHz, CDCl<sub>3</sub>):** δ 193.0 (t, *J* = 31.7 Hz), 136.4, 134.2, 133.9, 133.5, 131.1, 130.8, 130.1, 129.2, 129.1, 128.7, 128.59, 128.58, 128.57, 128.1, 127.5, 127.1, 126.7, 125.4, 124.1, 117.6 (t, *J* = 256.7 Hz), 51.3 (t, *J* = 22.7 Hz), 36.7.

**<sup>19</sup>F NMR (565 MHz, CDCl<sub>3</sub>):** δ -95.3 (d, *J* = 265.6 Hz, 1F), -104.8 (d, *J* = 271.2 Hz, 1F).

**IR (neat):** 3060, 1701, 1593, 1508, 1493, 1175, 1054, 775, 694.

**HRMS (ESI-TOF):** calculated for [C<sub>26</sub>H<sub>20</sub>F<sub>2</sub>OSNa (M + Na<sup>+</sup>): 441.1095, found: 441.1090.

**methyl N-(tert-butoxycarbonyl)-S-(2,2-difluoro-3-oxo-1,3-diphenylpropyl)-L-cysteinate (5a):**

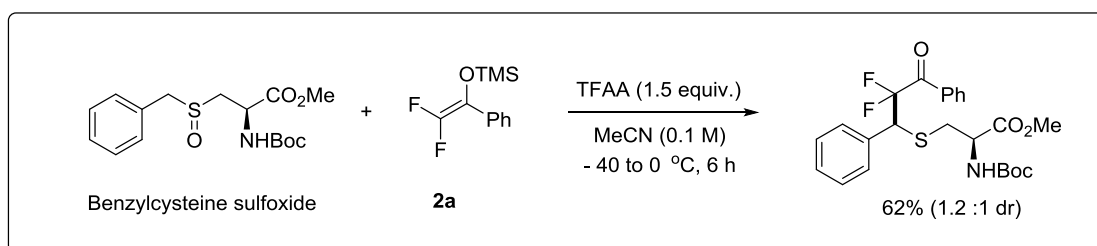

To a mixture of Benzylcysteine sulfoxide (171 mg, 0.5 mmol) and difluoroenol silyl ether **2a** (171 mg, 0.75 mmol) in MeCN (5.0 mL) was added trifluoroacetic anhydride (105 μL, 0.75 mmol) at -40 °C. After stirring for 5 min, the reaction mixture was gradually warmed to 0 °C and kept stirring for 6 h. After that, the mixture was passed through a short silica gel column and concentrated under vacuum. The obtained residue was further purified by flash chromatography on silica gel affording product **5a** as a mixture of two diastereoisomers (1.2:1 dr) in 62% yield, 148.5 mg.

**<sup>1</sup>H NMR (600 MHz, CDCl<sub>3</sub>):** δ 7.99 – 7.94 (m, 2H), 7.64 – 7.58 (m, 1H), 7.49 – 7.43 (m, 2H), 7.41 – 7.37 (m, 2H), 7.35 – 7.28 (m, 3H), 5.32 (d, *J* = 7.7 Hz, 0.47H), 5.13 (d, *J* = 7.8 Hz, 0.47H), 4.80 – 4.65 (m, 1H), 4.51 (d, *J* = 5.5 Hz, 1H), 3.70 (s, 1.61), 3.63 (s, 1.35), 3.10 – 3.05 (m, 0.56H), 3.02 – 2.90 (m, 1.47H), 1.45 (s, 4H), 1.42 (s, 5H).

**<sup>13</sup>C NMR (151 MHz, CDCl<sub>3</sub>):** δ 189.6 (t, *J* = 30.2 Hz), 189.5 (t, *J* = 30.2 Hz), 171.2, 171.1, 155.2, 155.1, 134.3, 134.2, 132.9, 132.8, 130.1, 130.0, 128.8, 128.7, 118.0 (t, *J* = 259.7 Hz), 117.9 (t, *J* = 259.7 Hz), 80.4, 80.3, 53.3 (t, *J* = 27.2 Hz), 53.1 (t, *J* = 27.2 Hz), 52.8, 52.7, 35.5, 34.8, 28.4, 28.3.

**<sup>19</sup>F NMR (565 MHz, CDCl<sub>3</sub>):** δ -97.8 (dd, *J* = 276.9 Hz), -98.1 (d, *J* = 276.9 Hz), -103.3 (d, *J* = 276.9 Hz).

**IR (neat):** 2977, 1741, 1700, 1597, 1498, 1448, 1241, 1159, 1125, 1009, 853, 817.

**HRMS (ESI-TOF):** calculated for [C<sub>24</sub>H<sub>28</sub>F<sub>2</sub>NO<sub>5</sub>S(M + H<sup>+</sup>)]: 480.1651, found: 480.1663.

**2-(benzhydrylsulfinyl)-3,3-difluoro-4-oxo-4-phenylbutanamide (5b):**

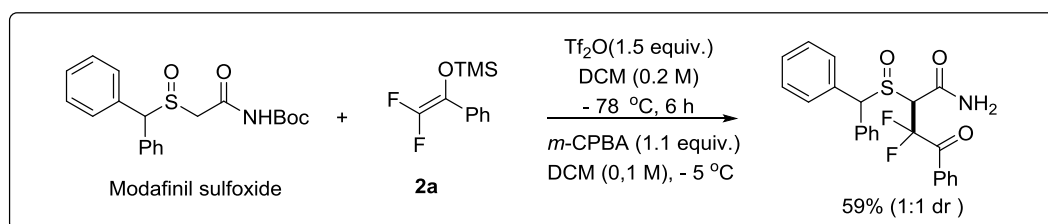

To a mixture of Modafinil sulfoxide (186.5 mg, 0.5 mmol) and difluoroenol silyl ether **2a** (171 mg, 0.75 mmol) in DCM (2.5 mL) was added trifluoromethanesulfonic anhydride (125  $\mu$ L, 0.75 mmol) at -78  $^\circ$ C. After stirring for 6 h, the mixture was passed through a short silica gel column and concentrated under vacuum. The obtained residue was dissolved in DCM (5.0 mL) and a solution of *m*-CPBA (95 mg, 0.55 mmol) in DCM (3 mL) was added slowly at -5  $^\circ$ C. After the sulfide completely consumed, the reaction was quenched with sat. aq. NaHCO<sub>3</sub>. The organic layer was separated, and the aqueous layer was extracted with DCM. The combined organic layers were washed with brine, dried over Na<sub>2</sub>SO<sub>4</sub>, filtrated and concentrated in vacuo. The obtained residue was then purified by column chromatography on silica gel affording the title compound **5b** as the mixture of two diastereoisomers (1:1 dr) in 59% yield, 126 mg.

**<sup>1</sup>H NMR (600 MHz, CDCl<sub>3</sub>):** δ 7.54 – 7.44 (m, 4H), 7.42 – 7.26 (m, 11H), 4.85 – 4.75 (m, 1H), 4.70 – 4.55 (m, 1H).

**<sup>13</sup>C NMR (151 MHz, CDCl<sub>3</sub>):** δ 137.7, 137.6, 137.4, 137.3, 136.5, 129.8, 128.9, 128.8, 128.6, 128.4, 128.2, 127.6, 127.4, 124.5, 117.9 (t, *J* = 252.2 Hz), 73.9 (m), 54.7 (t, *J* = 22.7 Hz).

**<sup>19</sup>F NMR (565 MHz, CDCl<sub>3</sub>):** δ -97.7 - -102.9 (m)

**IR (neat):** 3051, 2919, 2844, 2222, 1631, 1442, 1125, 1040, 860, 748, 688.

**HRMS (ESI-TOF):** calculated for [C<sub>23</sub>H<sub>20</sub>F<sub>2</sub>NO<sub>3</sub>S(M + H<sup>+</sup>): 428.1126, found: 428.1119.

**methyl N-(tert-butoxycarbonyl)-S-(2,2-difluoro-3-oxo-1,3-diphenylpropyl)-L-cysteinate (5c):**

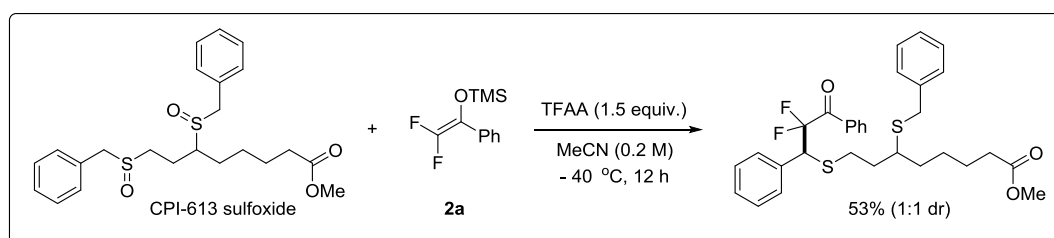

To a mixture of CPI-613 sulfoxide (217 mg, 0.5 mmol) and difluoroenol silyl ether **2a** (171 mg, 0.75 mmol) in MeCN (2.5 mL) was added trifluoroacetic anhydride (105 μL, 0.75 mmol) at -40 °C. After stirring for 12 h, the mixture was passed through a short silica gel column and concentrated under vacuum. The obtained residue was further purified by flash chromatography on silica gel affording product **5c** as the mixture of two diastereoisomers (1:1 dr) in 53% yield, 147 mg. Note: The other sulfoxide group was probably reduced to sulfide by the excess difluoroenol silyl ether.

**<sup>1</sup>H NMR (600 MHz, CDCl<sub>3</sub>):** δ 8.15 (d, *J* = 7.3 Hz, 0.86H), 8.03 (d, *J* = 7.8 Hz, 1.17H), 7.65 – 7.60 (m, 1H), 7.55 – 7.45 (m, 5H), 7.41 – 7.19 (m, 7H), 4.61 (dd, *J* = 20.4, 11.4 Hz, 1H), 3.76 – 3.56 (m, 5H), 3.13 – 2.79 (m, 0.41H), 2.75 – 2.44 (m, 2.49H), 2.41 – 2.12 (m, 2H), 1.82 – 1.08 (m, 8H).

**<sup>13</sup>C NMR (151 MHz, CDCl<sub>3</sub>):** δ 189.97 (t, *J* = 30.2 Hz), 189.92 (t, *J* = 30.2 Hz), 174.1, 138.6, 138.5, 138.4, 134.8, 134.7, 134.6, 134.2, 133.8, 133.0, 130.6, 130.2, 130.0, 129.9, 129.89, 128.9, 128.8, 128.6, 128.5, 127.1, 127.0, 118.0 (t, *J* = 259.7 Hz), 117.8 (t, *J* = 259.7 Hz), 52.4 (t, *J* = 27.2 Hz), 51.6, 44.0, 43.9, 39.7, 38.5, 38.3, 35.1, 34.5, 34.4, 33.93, 33.91, 30.5, 30.0, 26.2, 26.1, 26.0, 24.7, 24.6.

**<sup>19</sup>F NMR (565 MHz, CDCl<sub>3</sub>):** δ -97.8 (d, *J* = 271.2 Hz), -98.3 (d, *J* = 271.2 Hz), -103.3 (d, *J* = 271.2 Hz).

**IR (neat):** 3072, 2952, 1697, 1596, 1448, 1230, 1183, 1124, 1010, 809, 711.

**HRMS (ESI-TOF):** calculated for [C<sub>31</sub>H<sub>35</sub>F<sub>2</sub>O<sub>3</sub>S<sub>2</sub>(M + H<sup>+</sup>): 557.1990, found: 557.1997.



**tert-butyl (4-(2-(1,1-difluoro-2-oxo-2-phenylethyl)thiomorpholino)-3-fluorophenyl)(2-phenylacetyl)carbamate (5d):**

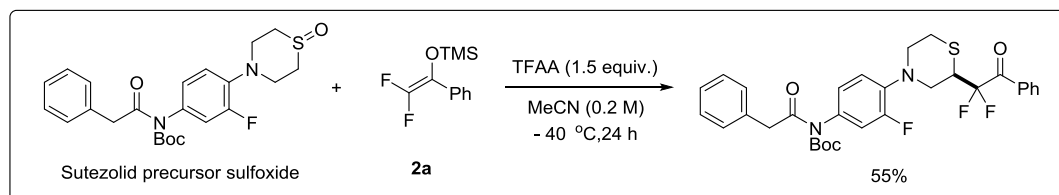

To a mixture of Sutezolid precursor sulfoxide (223 mg, 0.5 mmol) and difluoroenol silyl ether **2a** (171 mg, 0.75 mmol) in MeCN (5.0 mL) was added trifluoroacetic anhydride (105  $\mu\text{L}$ , 0.75 mmol) at  $-20^\circ\text{C}$ . After stirring for 12 h, the mixture was passed through a short silica gel column and concentrated under vacuum. The obtained residue was further purified by flash chromatography on silica gel affording product **5d** in 55% yield, 160.3 mg.

**$^1\text{H}$  NMR (600 MHz,  $\text{CDCl}_3$ ):**  $\delta$  8.14 (d,  $J = 7.8$  Hz, 2H), 7.67 (dd,  $J = 7.8, 7.4$  Hz, 1H), 7.53 (t,  $J = 7.8, 7.6$  Hz, 2H), 7.36 – 7.24 (m, 5H), 7.00 – 6.85 (m, 3H), 5.21 (s, 2H), 3.90 – 3.73 (m, 1H), 3.66 (d,  $J = 4.8$  Hz, 2H), 3.43 – 3.33 (m, 2H), 3.15 – 2.95 (m, 1H), 2.87 – 2.70 (m, 1H), 1.44 (s, 9H).

**$^{13}\text{C}$  NMR (151 MHz,  $\text{CDCl}_3$ ):**  $\delta$  189.0 (t,  $J = 30.2$  Hz), 156.0 (d,  $J = 249.2$  Hz), 153.0, 151.5, 139.9, 135.4, 134.6, 133.4, 132.4, 130.2, 128.9, 128.6, 128.4, 128.0, 124.4, 120.4, 118.0 (t,  $J = 259.7$  Hz), 116.8, 83.9, 68.5, 52.3, 51.4, 41.2 (t,  $J = 27.2$  Hz), 27.9, 26.9.

**$^{19}\text{F}$  NMR (565 MHz,  $\text{CDCl}_3$ ):**  $\delta$  -95.8 (dd,  $J = 276.9$  Hz), -105.6 (dd,  $J = 276.9$  Hz).

**IR (neat):** 3026, 2982, 1628, 1561, 1498, 1408, 1245, 1206, 1118, 760.

**HRMS (ESI-TOF):** calculated for  $[\text{C}_{31}\text{H}_{32}\text{F}_3\text{N}_2\text{O}_4\text{S}(\text{M} + \text{H}^+)]$ : 585.2029, found: 585.2033.

**di-tert-butyl**

**(3aR,6S,6aS)-4-(1,1-difluoro-2-oxo-2-phenylethyl)-6-(5-methoxy-5-oxopentyl)-2-oxotetrahydro-1H-thieno[3,4-d]imidazole-1,3(2H)-dicarboxylate (5e):**

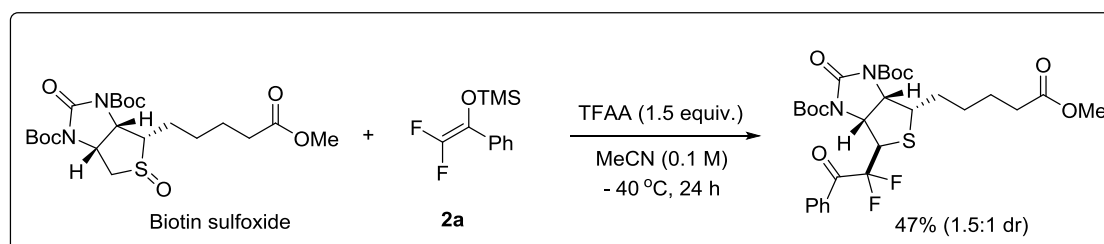

To a mixture of Biotin sulfoxide (237 mg, 0.5 mmol) and difluoroenol silyl ether **2a** (171 mg, 0.75

mmol) in MeCN (5.0 mL) was added trifluoroacetic anhydride (105  $\mu$ L, 0.75 mmol) at  $-40$   $^{\circ}$ C. After stirring for 24 h, the mixture was passed through a short silica gel column and concentrated under vacuum. The obtained residue was further purified by flash chromatography on silica gel affording product **5e** as the mixture of two diastereoisomers (1.5:1 dr) in 47% yield, 144 mg.

**$^1$ H NMR (600 MHz,  $\text{CDCl}_3$ ):**  $\delta$  8.18 (d,  $J = 7.4$  Hz, 0.79H), 8.04 (d,  $J = 7.8$  Hz, 1.17H), 7.69 – 7.60 (m, 1H), 7.49 (t,  $J = 7.8$  Hz, 2H), 6.52 (s, 1H), 5.08 (d,  $J = 7.9$  Hz, 0.55H), 4.93 (d,  $J = 7.1$  Hz, 0.54H), 4.77 (s, 0.63H), 4.28 (dd,  $J = 27.5, 5.5$  Hz, 0.57H), 3.82 – 3.66 (m, 1H), 3.63 (s, 1.2H), 3.62 (s, 1.67H), 2.32 – 2.20 (m, 2H), 1.64 – 1.43 (m, 22.43H), 1.32 – 1.20 (m, 1.69H).

**$^{13}$ C NMR (151 MHz,  $\text{CDCl}_3$ ):**  $\delta$  188.0 (t,  $J = 30.2$  Hz), 186.0 (t,  $J = 30.2$  Hz), 174.0, 155.6, 150.5, 149.9, 149.6, 149.0, 148.3, 135.2, 134.7, 132.2, 132.1, 130.7, 130.1, 128.9, 128.8, 118.9 (t,  $J = 259.7$  Hz), 115.0 (t,  $J = 259.7$  Hz), 84.9, 84.6, 84.3, 84.2, 61.2, 60.4, 59.5, 54.1, 53.2, 52.9 (t,  $J = 27.2$  Hz), 51.7, 33.71, 33.70, 30.5, 29.3, 28.9, 28.1, 28.0, 27.9, 27.8, 26.7, 24.8, 24.2.

**$^{19}$ F NMR (565 MHz,  $\text{CDCl}_3$ ):**  $\delta$  -95.7 (d,  $J = 276.9$  Hz, 1F), -96.9 (d,  $J = 276.9$  Hz, 1F), -104.9 (d,  $J = 276.9$  Hz, 1F), -105.5 (d,  $J = 276.9$  Hz, 1F).

**IR (neat):** 3026, 2982, 1628, 1561, 1498, 1408, 1245, 1206, 1118, 760.

**HRMS (ESI-TOF):** calculated for  $[\text{C}_{29}\text{H}_{39}\text{F}_2\text{N}_2\text{O}_8\text{S}(\text{M} + \text{H}^+)]$ : 613.2390, found: 613.2377.

**(8R,9S,13S,14S)-13-methyl-17-oxo-7,8,9,11,12,13,14,15,16,17-decahydro-6H-cyclopenta[a]phenanthren-3-yl (S)-2-(butylthio)-3,3-difluoro-4-oxo-4-phenylbutanoate (**5f**):**

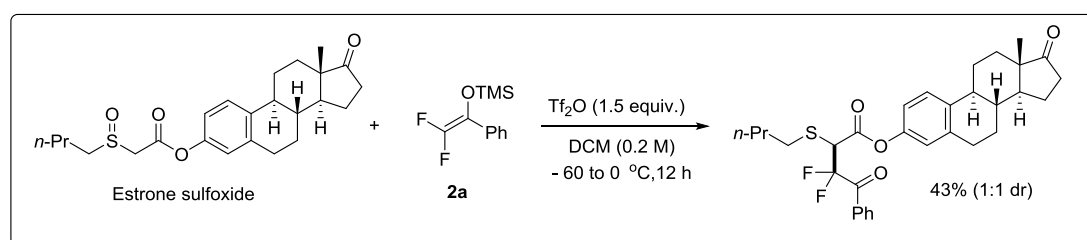

To a mixture of Estrone sulfoxide (208 mg, 0.5 mmol) and difluoroenol silyl ether **2a** (171 mg, 0.75 mmol) in DCM (2.5 mL) was added trifluoromethanesulfonic anhydride (125  $\mu$ L, 0.75 mmol) at  $-60$   $^{\circ}$ C. After stirring for 5 min, the reaction mixture was gradually warmed to  $0$   $^{\circ}$ C and kept stirring for 12 h. After that, the mixture was passed through a short silica gel column and concentrated under vacuum. The obtained residue was further purified by flash chromatography on silica gel affording product **5f** as the mixture of two diastereoisomers (1:1 dr) in 43% yield, 119 mg.

**<sup>1</sup>H NMR (600 MHz, CDCl<sub>3</sub>):** δ 8.13 (d, *J* = 7.8 Hz, 2H), 7.65 (dd, *J* = 7.8, 7.4 Hz, 1H), 7.51 (dd, *J* = 7.8, 7.8 Hz, 2H), 7.30 (d, *J* = 8.6 Hz, 1H), 6.95 – 6.90 (m, 1H), 6.88 (s, 1H), 4.34 (dd, *J* = 18.0, 11.1 Hz, 1H), 2.98 – 2.81 (m, 4H), 2.50 (dd, *J* = 19.1, 8.7 Hz, 1H), 2.44 – 2.35 (m, 1H), 2.30 – 2.24 (m, 1H), 2.18 – 2.10 (m, 1H), 2.09 – 1.90 (m, 3H), 1.73 – 1.38 (m, 10H), 0.94 (t, *J* = 7.4 Hz, 3H), 0.90 (s, 3H).

**<sup>13</sup>C NMR (151 MHz, CDCl<sub>3</sub>):** δ 188.8 (t, *J* = 30.2 Hz), 166.5, 148.2, 138.2, 137.9, 134.8, 130.3, 128.8, 126.6, 121.3, 118.5, 116.7 (t, *J* = 259.7 Hz), 50.4, 49.7 (t, *J* = 27.2 Hz), 48.0, 44.2, 38.0, 35.9, 33.0, 31.6, 31.3, 29.4, 26.3, 25.8, 21.8, 21.6, 13.9, 13.7.

**<sup>19</sup>F NMR (565 MHz, CDCl<sub>3</sub>):** δ -99.88 (d, *J* = 276.9 Hz, 1F), -100.41 (d, *J* = 276.9 Hz, 1F), -102.31 (d, *J* = 276.9 Hz, 1F), -102.84 (d, *J* = 276.9 Hz, 1F).

**IR (neat):** 3012, 2982, 1628, 1561, 1498, 1408, 1245, 1206, 1118, 760.

**HRMS (ESI-TOF):** calculated for [C<sub>32</sub>H<sub>37</sub>F<sub>2</sub>O<sub>4</sub>S(M + H<sup>+</sup>)]: 555.2375, found: 555.2377.

## 5 NMR analysis.

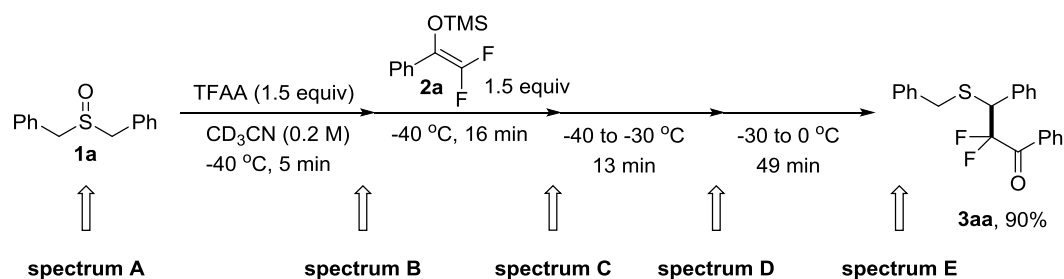

To a solution of dibenzyl sulfoxide **1a** (0.1 mmol in 0.5 mL of CD<sub>3</sub>CN) in NMR tube was added trifluoroacetic anhydride TFAA (21 μL, 0.15 mmol) at – 40 °C. After shaking for 5 min, the reaction mixture was brought for NMR analysis (**spectrum B**, 600 MHz, temperature of NMR was –40 °C). After addition of difluoroenol silyl ether **2a** (34 mg, 0.15 mmol) in cooling bath (–40 °C), the tube was quickly inserted into NMR again. The whole reaction process was then monitored. With the temperature gradually increased, **spectra C, D, E** were obtained at –40, –30 and 0 °C, respectively.

Note: To better understand the reaction process, unlike the general procedure, sulfoxide **1a** was treated with Tf<sub>2</sub>O prior to the addition of **2a**. Both procedures gave similar yields of product **3aa**. The <sup>19</sup>F-NMR analysis of intermediates were also carried out, however the given NMR spectrums were too complicated to be analyzed.

### NMR spectrum A

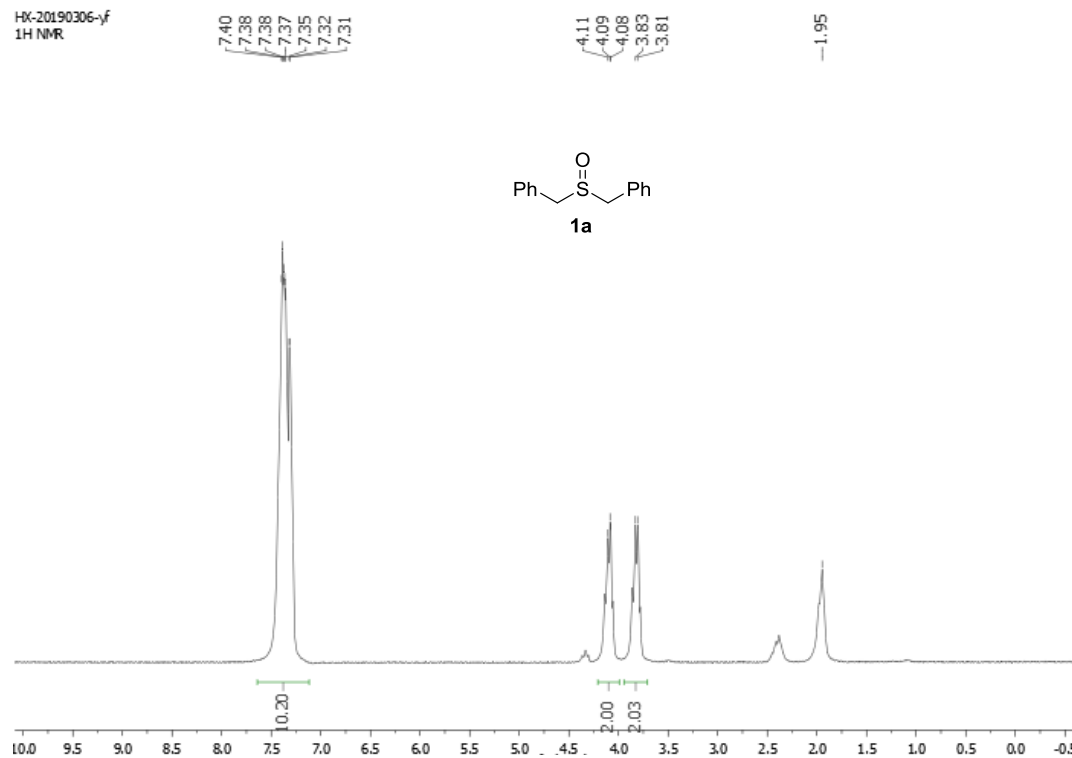

### NMR spectrum B

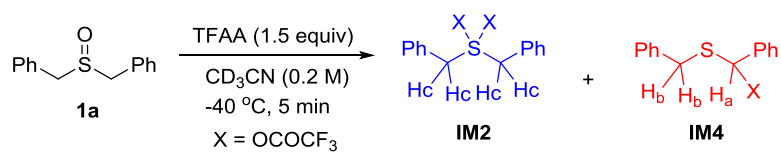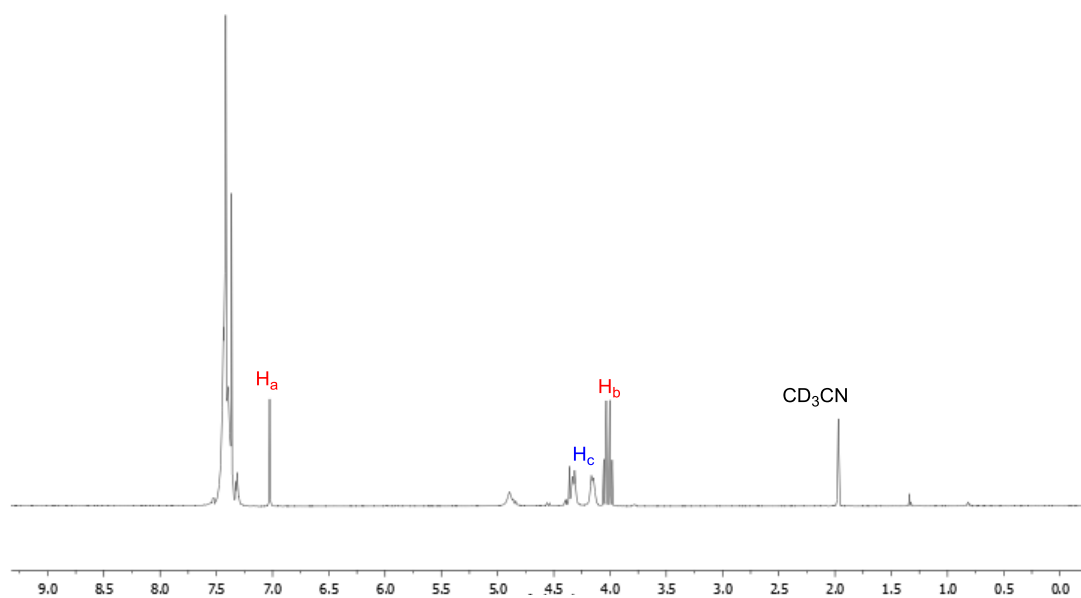

## NMR spectrum C

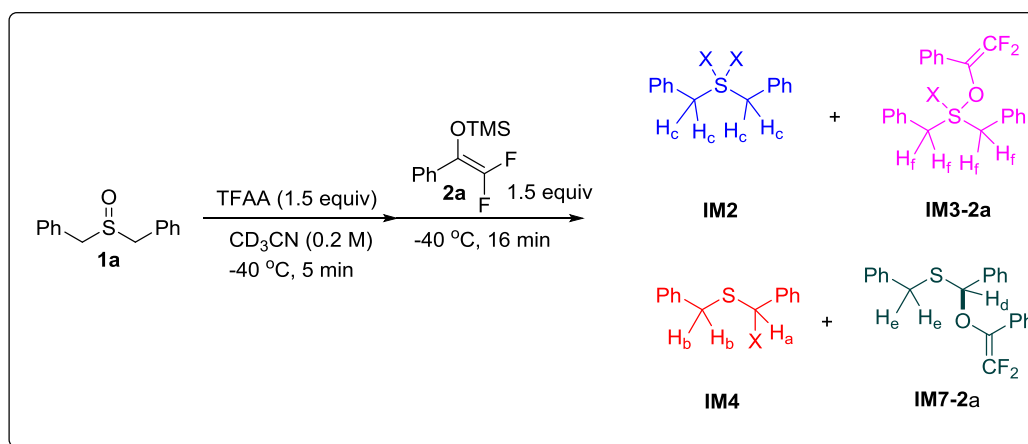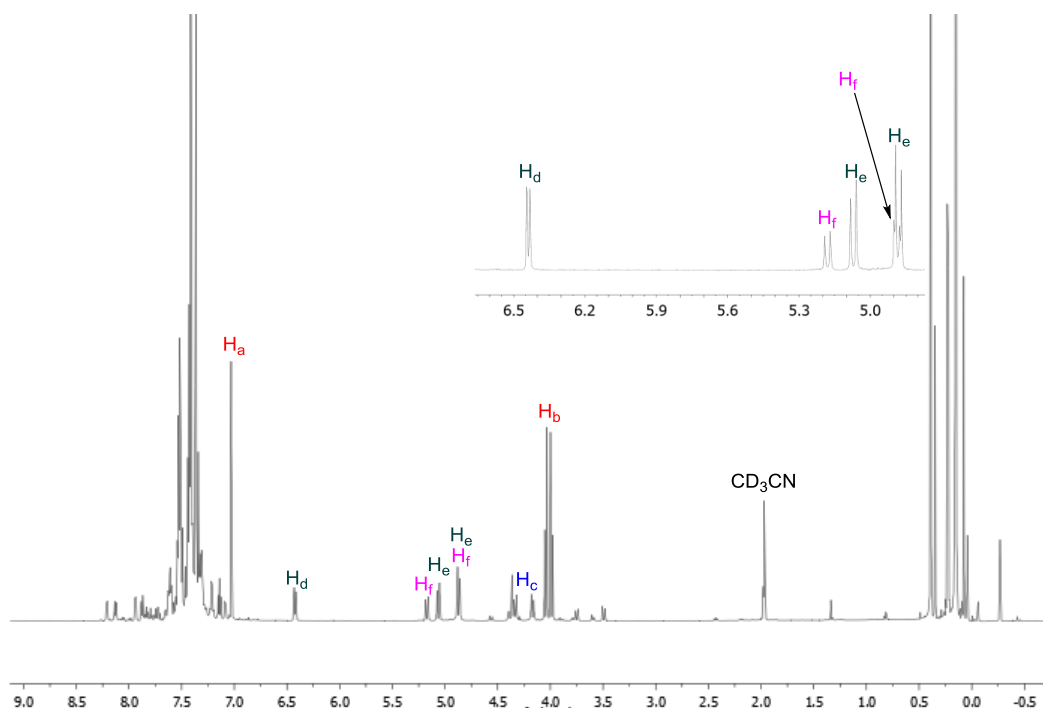

The structure of intermediate **IM3-2a** was proposed on the basis of reported literature (*Tetrahedron Lett.* **1984**, *25*, 4681) and NMR analysis. A similar oxygen-attacked intermediate was studied in our recent work on the [3,3]-rearrangement reaction of arylidane with difluoroenol silyl ether (*Angew. Chem. Int. Ed.* **2019**, *58*, 5956).

The structure of intermediate **IM7-2a** was proposed on the basis of DFT calculation and NMR analysis.

## NMR spectrum D

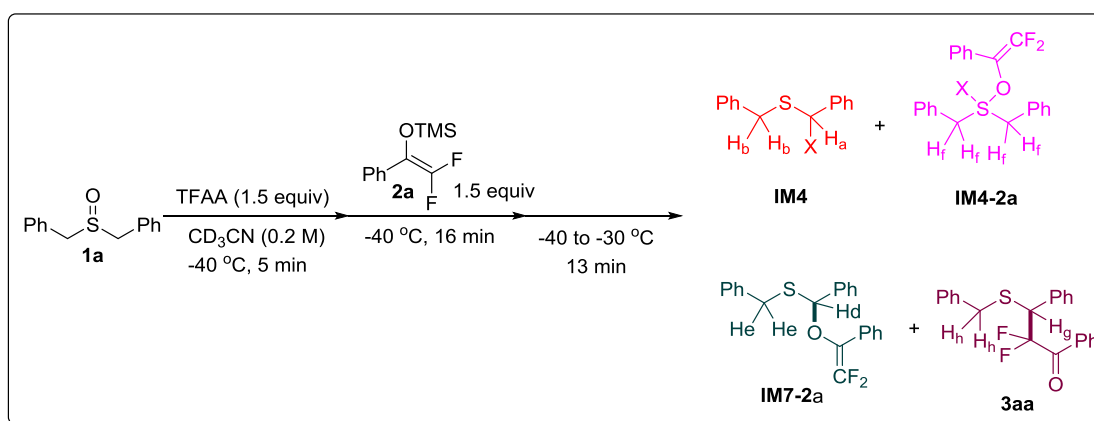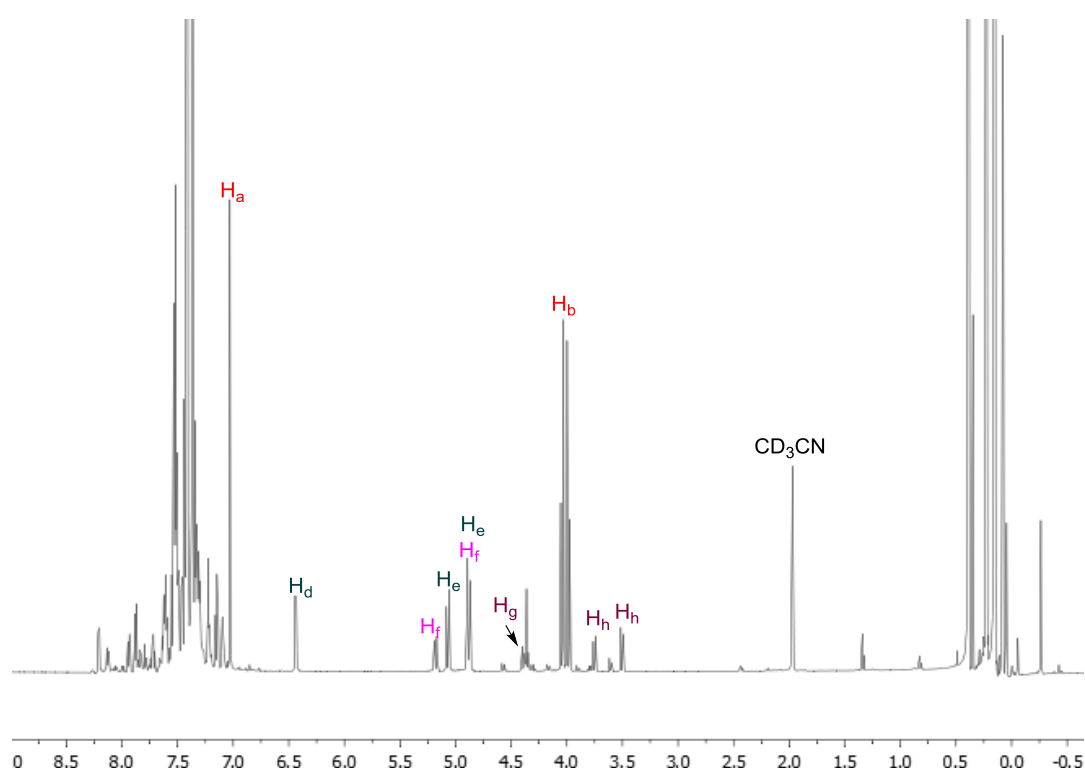

Note: According to NMR intergrations, it was found that intermediate **IM4** would completely convert to the desired product **3aa**, while **IM4-2a** and **IM7-2a** were not stable and decomposed to unknown byproducts with the increasing temperature.

### NMR spectrum E

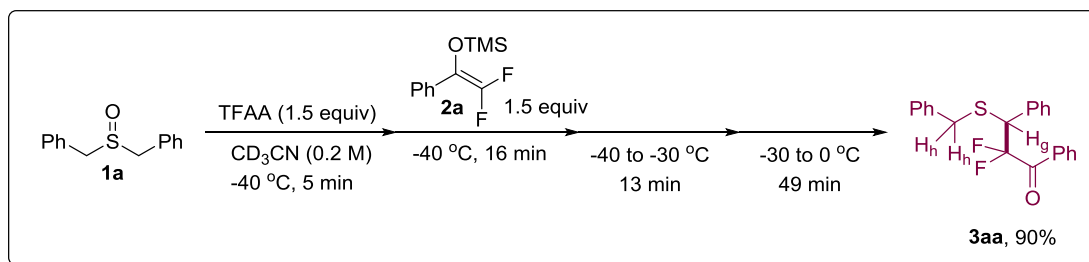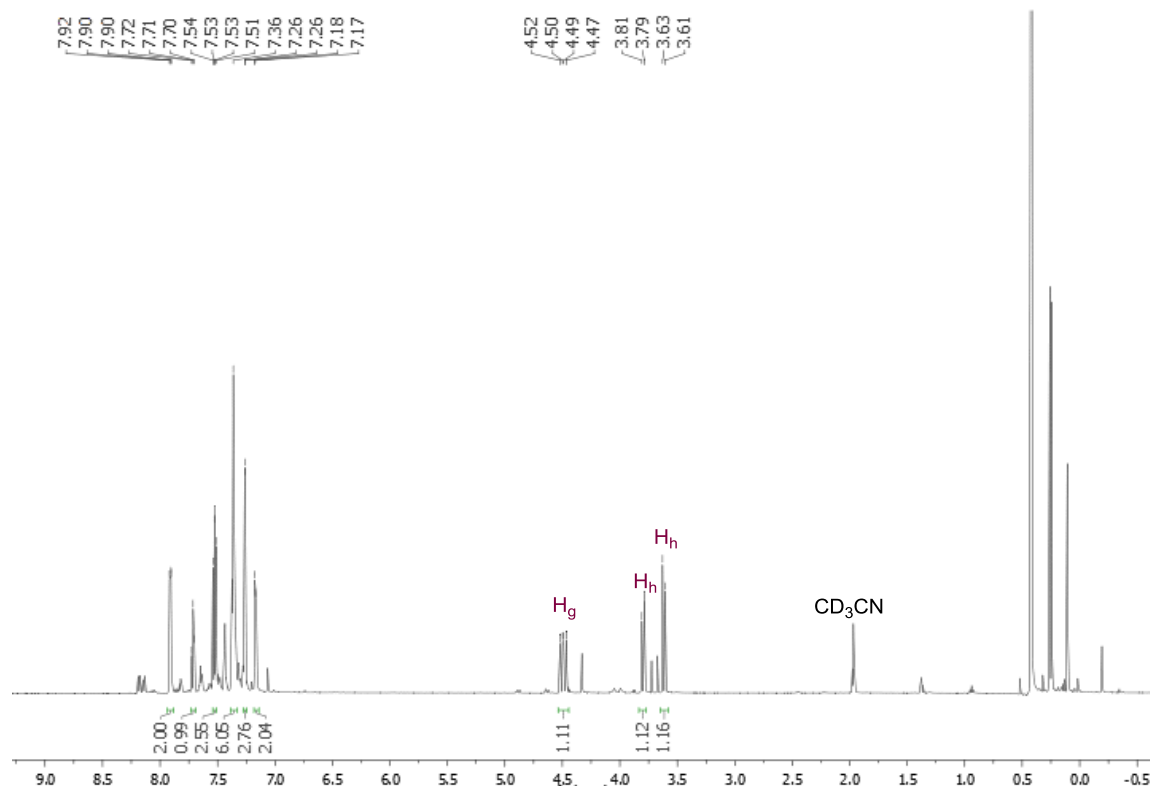



## 6 Density functional theory (DFT) calculations

### Computational Details

All structures were optimized at M062X<sup>1</sup>/6-31G(d,p) with solvent effects accounted by the SMD<sup>2</sup> solvent model, using the experimental solvent (acetonitrile). Harmonic frequency analysis calculations were subsequently performed to verify the optimized geometries to be minima (no imaginary frequency) or transition states (TSs, having unique one imaginary frequency). The energies were then improved by M062X/6-311++G(d,p)//M062X/6-31(d,p) single-point calculations with solvent effects accounted by the SMD solvent model, using the experimental solvent (acetonitrile). The refined energies were then corrected to enthalpies and free energies at experimental temperature (233.15K) and 1 atm, using the M062X/6-31G(d,p) harmonic frequencies. In addition, considering the overestimation of entropic contributions by the ideal gas phase model implemented in Gaussian program, a correction of  $RT\ln(V^T) [=R*233.15*\ln(22.4*233.15/273.15)=1.37 \text{ kcal mol}^{-1}]$  to the calculated free energies of all species was applied to adjust 1atm to 1M standard-state concentration.<sup>3</sup> Atomic partial charge were calculated at the M062X(SMD)/6-311++G(d,p)//M062X(SMD)/6-31G(d,p) level according to the natural bond orbital (NBO) method.<sup>4</sup> Total energies and Cartesian coordinates of all optimized structures are given below in this Supporting Information. All standard DFT calculations were carried out using Gaussian 09 program.<sup>5</sup>

### References

- [1] (a) Y. Zhao and D. G. Truhlar, *Theor. Chem. Acc.*, 2008, 120,215–241; (b) Y. Zhao and D. G. Truhlar, *Acc. Chem. Res.*, 2008, 41, 157–167; (c) R. Valero, R. Costa, I. D. P. R. Moreira, D. G. Truhlar and F. Illas, *J. Chem. Phys.*, 2008, 128, 114103.
- [2] A. V. Marenich, C. J. Cramer, D. G. Truhlar, *J. Phys. Chem. B* 2009, 113, 6378–6396.
- [3] C. J. Cramer, *Essentials of Computational Chemistry: Theories and Models*, 2nd ed.; John Wiley & Sons, Ltd: New York, **2004**, pp 378–379; c) L. Vígara, M. Z. Ertem, N. Planas, F. Bozoglian, N. Leidel, H. Dau, M. Haumann, L. Gagliardi, C. J. Cramer, A. Llobet, *Chem. Sci.* **2012**, 3, 2576-2586.
- [4] A. E. Reed, L. A. Curtiss, F. Weinhold, *Chem. Rev.* **1988**, 88, 899-926. c) A. E. Reed, R. B. Weinstock, F. Weinhold, *J. Chem. Phys.* **1985**, 83, 735-746. d) J. P. Foster, F. Weinhold *J. Am. Chem. Soc.* **1980**, 102, 7211-7218
- [5] Gaussian 09, Revision A.01, M. J. Frisch, G. W. Trucks, H. B. Schlegel, G. E. Scuseria, M. A. Robb, J. R. Cheeseman, G. Scalmani, V. Barone, B. Mennucci, G. A. Petersson, H. Nakatsuji, M. Caricato, X. Li, H. P. Hratchian, A. F. Izmaylov, J. Bloino, G. Zheng, J. L. Sonnenberg, M. Hada, M. Ehara, K. Toyota, R. Fukuda, J. Hasegawa, M. Ishida, T. Nakajima, Y. Honda, O. Kitao, H. Nakai, T. Vreven, J. A. Montgomery, Jr., J. E. Peralta, F. Ogliaro, M. Bearpark, J. J. Heyd, E. Brothers, K. N. Kudin, V. N. Staroverov, T. Keith, R. Kobayashi, J. Normand, K. Raghavachari, A. Rendell, J. C. Burant, S. S. Iyengar, J. Tomasi, M. Cossi, N. Rega, J. M. Millam, M. Klene, J. E. Knox, J. B. Cross, V. Bakken, C. Adamo, J. Jaramillo, R. Gomperts, R. E. Stratmann, O. Yazyev, A. J. Austin, R. Cammi, C. Pomelli, J. W. Ochterski, R. L. Martin, K. Morokuma, V. G. Zakrzewski, G. A. Voth, P. Salvador, J. J. Dannenberg, S. Dapprich, A. D. Daniels, O. Farkas, J. B. Foresman, J. V. Ortiz, J. Cioslowski, and D. J. Fox, Gaussian, Inc., Wallingford CT, 2009.

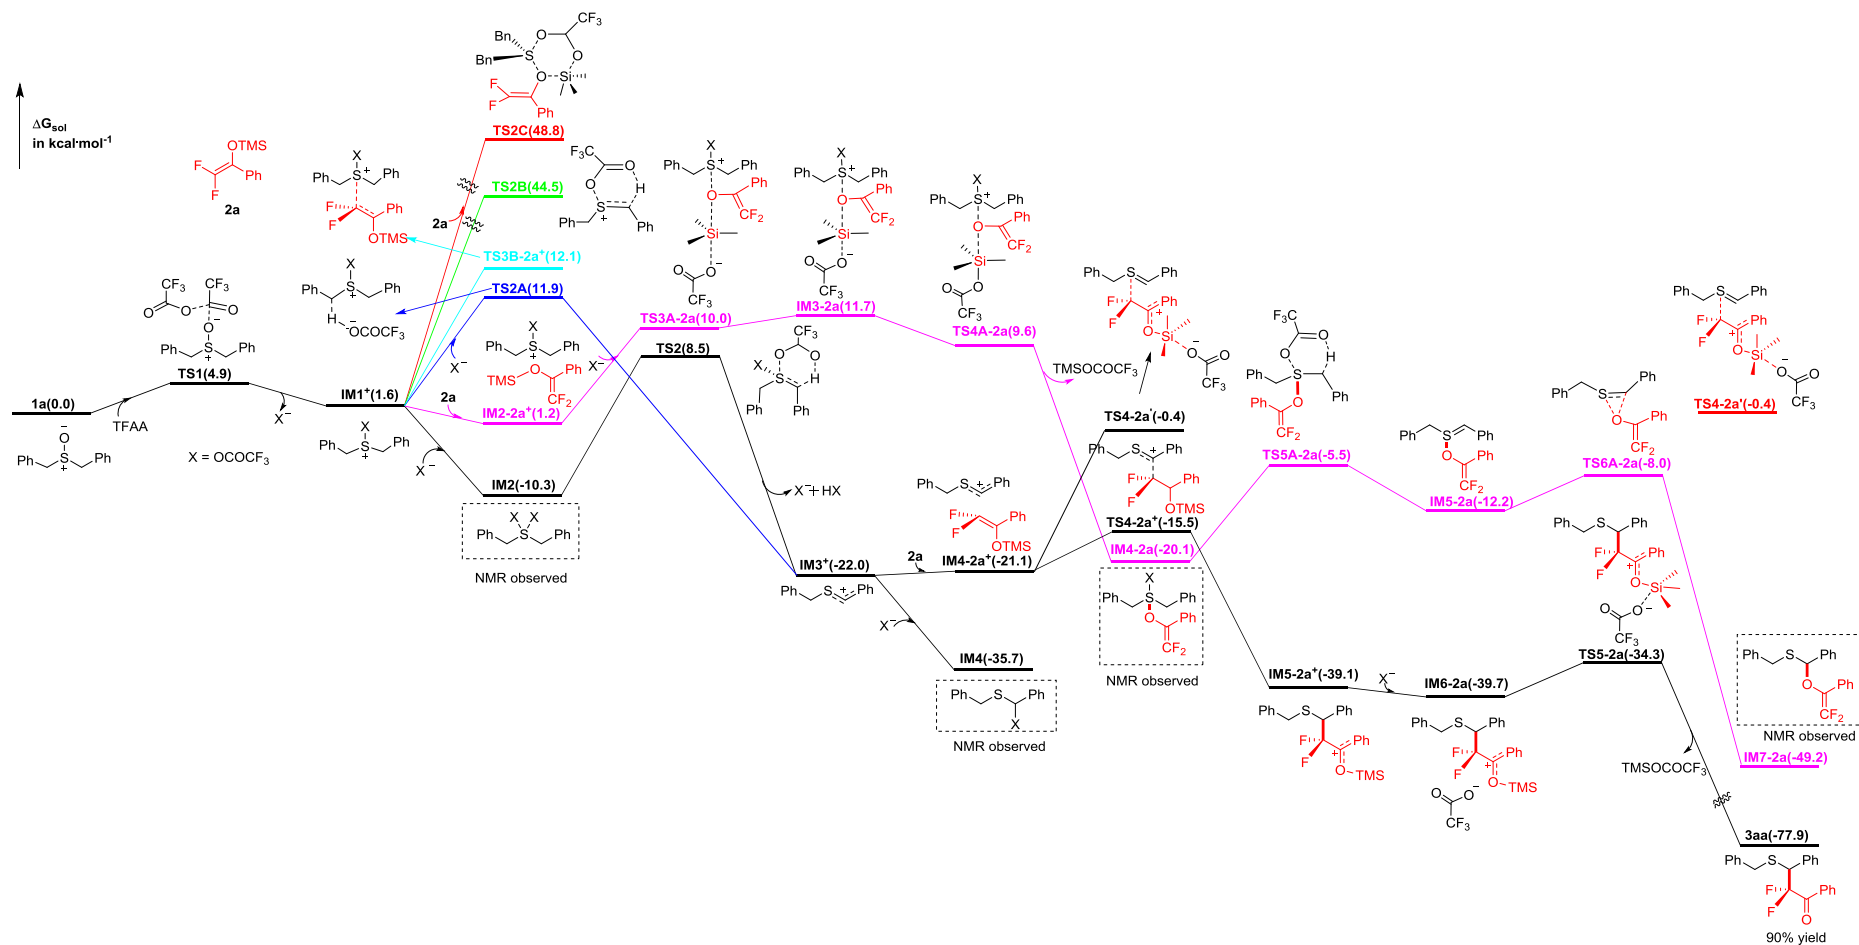

**Fig. S1.** Free energy profile for the reaction of **1a** with **2a**, along with relative free energies in  $\text{kcal mol}^{-1}$ . The pathway in pink color lead to the byproduct **IM7-2a** which was observed at NMR (See Section 5). **IM7-2a** was not stable and decomposed with the increasing temperature.

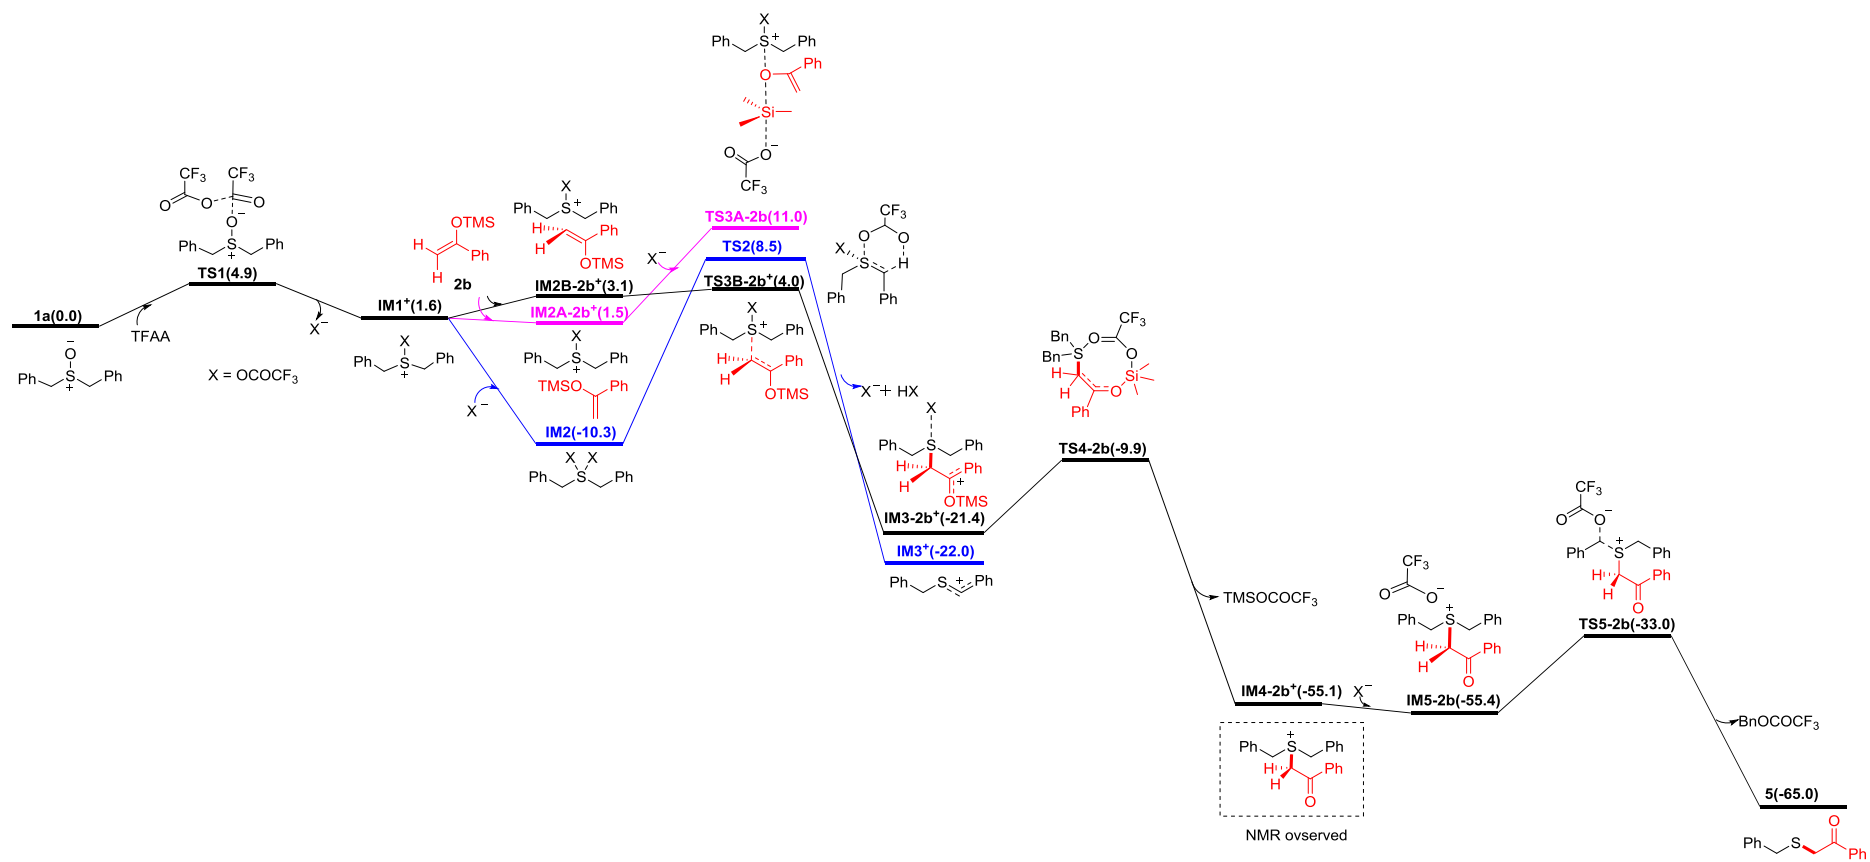

**Fig. S2.** Free energy profile for the reaction of **1a** with **2b**, along with relative free energies in kcal mol<sup>-1</sup>.

**Cartesian Coordinates (in Å), SCF Energies,  
and Free Energies (in a.u.) at 233.15 K  
and 1 atm for the Optimized Structures**

**BSI=6-31G(d,p)**

**BSII=6-311++G(d,p)**

**1a**

M062X/BSI SCF energy: -1015.013729 a.u.

M062X/BSII SCF energy in solution: -1015.207973

a.u.

M062X/BSII free energy in solution: -1014.995267

a.u.

|   |           |           |           |
|---|-----------|-----------|-----------|
| S | 0.000008  | 0.164149  | -0.016992 |
| O | -0.000178 | -1.311577 | -0.350674 |
| C | -1.361877 | 0.429748  | 1.178976  |
| C | 1.361874  | 0.429310  | 1.179045  |
| C | -2.678672 | 0.220116  | 0.492734  |
| C | -3.211321 | -1.067035 | 0.371455  |
| C | -4.412311 | -1.270957 | -0.303514 |
| C | -5.088753 | -0.191238 | -0.869361 |
| C | -4.558844 | 1.093563  | -0.759720 |
| C | -3.357767 | 1.297131  | -0.084972 |
| C | 2.678690  | 0.219846  | 0.492780  |
| C | 3.211171  | -1.067307 | 0.370849  |
| C | 4.412175  | -1.271041 | -0.304170 |
| C | 5.088795  | -0.191127 | -0.869403 |
| C | 4.559052  | 1.093702  | -0.759097 |
| C | 3.357976  | 1.297072  | -0.084322 |
| H | -1.203480 | -0.287488 | 1.990264  |
| H | -1.253811 | 1.449669  | 1.560469  |
| H | -2.679865 | -1.906145 | 0.811148  |
| H | -4.820967 | -2.273281 | -0.387877 |
| H | -6.026850 | -0.350346 | -1.392147 |
| H | -5.080975 | 1.937836  | -1.199472 |
| H | -2.942758 | 2.298175  | 0.002312  |
| H | 1.253883  | 1.449095  | 1.560917  |
| H | 1.203407  | -0.288199 | 1.990081  |
| H | 2.679571  | -1.906590 | 0.810048  |
| H | 4.820688  | -2.273381 | -0.389024 |
| H | 6.026887  | -0.350075 | -1.392243 |
| H | 5.081359  | 1.938139  | -1.198330 |
| H | 2.943074  | 2.298125  | 0.003436  |

**TFAA**

M062X/BSI SCF energy: -976.804709 a.u.

M062X/BSII SCF energy in solution: -977.136137

a.u.

M062X/BSII free energy in solution: -977.11092

a.u.

|   |           |           |           |
|---|-----------|-----------|-----------|
| O | -1.380519 | 1.897752  | 0.000158  |
| O | 1.380510  | 1.897753  | -0.000205 |
| O | -0.000003 | 0.065182  | 0.000293  |
| C | 2.306371  | -0.340106 | -0.000025 |
| C | -2.306369 | -0.340112 | -0.000020 |
| F | 3.492175  | 0.246081  | -0.000364 |
| F | 2.194559  | -1.110123 | -1.080244 |
| F | 2.194975  | -1.109599 | 1.080637  |
| F | -2.194771 | -1.109629 | -1.080637 |
| F | -3.492175 | 0.246075  | 0.000087  |
| F | -2.194748 | -1.110095 | 1.080248  |
| C | 1.197271  | 0.726786  | -0.000037 |
| C | -1.197277 | 0.726785  | 0.000165  |

**2a**

M062X/BSI SCF energy: -991.733775 a.u.

M062X/BSII SCF energy in solution: -991.965444

a.u.

M062X/BSII free energy in solution: -991.770098

a.u.

|   |           |           |           |
|---|-----------|-----------|-----------|
| C | 0.254682  | 2.028379  | -0.313498 |
| C | -0.020679 | 0.731639  | -0.458353 |
| F | 1.451838  | 2.549191  | -0.524134 |
| F | -0.611241 | 2.967766  | 0.029744  |
| C | -1.351334 | 0.126123  | -0.241784 |
| C | -1.638989 | -1.083507 | -0.886815 |
| C | -2.316479 | 0.695587  | 0.600347  |
| C | -2.872144 | -1.702901 | -0.707255 |
| H | -0.889238 | -1.532215 | -1.530412 |
| C | -3.547924 | 0.071609  | 0.774657  |
| H | -2.102214 | 1.615469  | 1.132532  |
| C | -3.832546 | -1.126758 | 0.121768  |
| H | -3.082131 | -2.637803 | -1.217736 |
| H | -4.284553 | 0.520096  | 1.434112  |
| H | -4.793871 | -1.610421 | 0.263747  |
| O | 0.982798  | -0.079922 | -0.914601 |

|    |          |           |           |
|----|----------|-----------|-----------|
| Si | 1.995164 | -0.878984 | 0.199586  |
| C  | 2.983026 | 0.397708  | 1.141978  |
| H  | 3.659222 | -0.104735 | 1.842957  |
| H  | 3.589665 | 1.015752  | 0.473708  |
| H  | 2.334663 | 1.057070  | 1.728353  |
| C  | 0.948468 | -1.883898 | 1.379854  |
| H  | 0.392340 | -2.671980 | 0.862763  |
| H  | 1.593765 | -2.360354 | 2.126630  |
| H  | 0.229881 | -1.255793 | 1.917208  |
| C  | 3.075211 | -1.953814 | -0.873260 |
| H  | 3.730945 | -2.579132 | -0.258652 |
| H  | 2.467550 | -2.616272 | -1.497890 |
| H  | 3.706165 | -1.348144 | -1.531044 |

**2b**

M062X/BSI SCF energy: -793.332279 a.u.

M062X/BSII SCF energy in solution: -793.491136 a.u.

M062X/BSII free energy in solution: -793.280443 a.u.

|    |           |           |           |
|----|-----------|-----------|-----------|
| C  | 0.185281  | 2.422065  | -0.640749 |
| C  | -0.016467 | 1.100308  | -0.634064 |
| C  | -1.311919 | 0.440346  | -0.318641 |
| C  | -1.534674 | -0.876200 | -0.738461 |
| C  | -2.319295 | 1.101979  | 0.396581  |
| C  | -2.743518 | -1.512131 | -0.465946 |
| H  | -0.755587 | -1.395904 | -1.286299 |
| C  | -3.525958 | 0.465076  | 0.666961  |
| H  | -2.152225 | 2.110880  | 0.761475  |
| C  | -3.744066 | -0.843251 | 0.235133  |
| H  | -2.902605 | -2.532006 | -0.802780 |
| H  | -4.295844 | 0.988424  | 1.225595  |
| H  | -4.685368 | -1.339338 | 0.450426  |
| O  | 0.985914  | 0.234052  | -0.983052 |
| Si | 2.089730  | -0.333583 | 0.174381  |
| C  | 3.340768  | 1.010733  | 0.527529  |
| H  | 4.111502  | 0.643478  | 1.214175  |
| H  | 3.836391  | 1.341428  | -0.390874 |
| H  | 2.869655  | 1.882487  | 0.993559  |
| C  | 1.160647  | -0.789997 | 1.733983  |
| H  | 0.450777  | -1.604446 | 1.558346  |
| H  | 1.865018  | -1.116435 | 2.507045  |
| H  | 0.604708  | 0.066005  | 2.132009  |

|   |           |           |           |
|---|-----------|-----------|-----------|
| C | 2.880271  | -1.818229 | -0.631916 |
| H | 3.641081  | -2.256981 | 0.022064  |
| H | 2.133971  | -2.590338 | -0.845302 |
| H | 3.364839  | -1.543595 | -1.574307 |
| H | -0.617569 | 3.117996  | -0.430441 |
| H | 1.161286  | 2.821889  | -0.894069 |

**CF<sub>3</sub>COO<sup>-</sup>**

M062X/BSI SCF energy: -526.144045 a.u.

M062X/BSII SCF energy in solution: -526.350597 a.u.

M062X/BSII free energy in solution: -526.345334 a.u.

|   |           |           |           |
|---|-----------|-----------|-----------|
| O | 1.506973  | -1.142410 | 0.000028  |
| O | 1.577617  | 1.129182  | 0.000052  |
| C | -0.516206 | 0.015985  | 0.000050  |
| F | -1.063335 | 1.243256  | 0.001186  |
| F | -1.014569 | -0.625623 | 1.078945  |
| F | -1.014306 | -0.623448 | -1.080304 |
| C | 1.041736  | 0.010375  | 0.000105  |

**CF<sub>3</sub>COOH**

M062X/BSI SCF energy: -526.609593 a.u.

M062X/BSII SCF energy in solution: -526.792937 a.u.

M062X/BSII free energy in solution: -526.775676 a.u.

|   |           |           |           |
|---|-----------|-----------|-----------|
| O | -1.438830 | -1.242628 | 0.001247  |
| O | -1.661202 | 0.971753  | -0.001471 |
| C | 0.578887  | 0.007271  | 0.000237  |
| F | 0.947220  | 1.293566  | 0.050998  |
| F | 1.086065  | -0.534013 | -1.104088 |
| F | 1.095285  | -0.621918 | 1.051548  |
| C | -0.955809 | -0.146631 | 0.001366  |
| H | -1.095343 | 1.764439  | 0.006067  |

**CF<sub>3</sub>COOTMS**

M062X/BSI SCF energy: -935.231625 a.u.

M062X/BSII SCF energy in solution: -935.471168 a.u.

M062X/BSII free energy in solution: -935.369569 a.u.

|    |           |           |           |
|----|-----------|-----------|-----------|
| Si | 1.869731  | -0.075884 | 0.000001  |
| C  | 2.216200  | 0.874070  | 1.563023  |
| H  | 1.906339  | 0.300576  | 2.442391  |
| H  | 3.290574  | 1.067560  | 1.651541  |
| H  | 1.694371  | 1.834483  | 1.574831  |
| C  | 2.646785  | -1.763770 | -0.000005 |
| H  | 2.352643  | -2.333660 | -0.886639 |
| H  | 3.738665  | -1.682469 | -0.000083 |
| H  | 2.352766  | -2.333621 | 0.886694  |
| C  | 2.216026  | 0.873980  | -1.563113 |
| H  | 3.290401  | 1.067375  | -1.651823 |
| H  | 1.905974  | 0.300473  | -2.442405 |
| H  | 1.694278  | 1.834438  | -1.574885 |
| O  | 0.162644  | -0.470930 | 0.000099  |
| O  | -0.605735 | 1.655385  | -0.000018 |
| C  | -2.161767 | -0.173092 | 0.000013  |
| F  | -3.106133 | 0.760870  | 0.000011  |
| F  | -2.324506 | -0.941751 | 1.080488  |
| F  | -2.324451 | -0.941704 | -1.080509 |
| C  | -0.760864 | 0.461287  | 0.000049  |

**CF<sub>3</sub>COOBn**

M062X/BSI SCF energy: -796.862563 a.u.

M062X/BSII SCF energy in solution: -797.108448 a.u.

M062X/BSII free energy in solution: -796.98696 a.u.

|   |           |           |           |
|---|-----------|-----------|-----------|
| O | -0.950444 | 1.591046  | 0.014717  |
| C | 0.472513  | 0.006557  | 1.703261  |
| C | 1.638284  | -0.026447 | 0.753002  |
| C | 2.203419  | 1.157832  | 0.277790  |
| C | 3.281995  | 1.116207  | -0.603434 |
| C | 3.792454  | -0.110784 | -1.022062 |
| C | 3.226545  | -1.297491 | -0.555469 |
| C | 2.154530  | -1.254857 | 0.331026  |
| H | 0.317413  | 1.004804  | 2.117655  |
| H | 1.794247  | 2.110987  | 0.600495  |
| H | 3.719889  | 2.041115  | -0.965791 |
| H | 4.632625  | -0.143625 | -1.708945 |
| H | 3.624606  | -2.254277 | -0.878818 |
| H | 1.716148  | -2.177061 | 0.704396  |
| O | -0.752533 | -0.416884 | 1.042908  |

|   |           |           |           |
|---|-----------|-----------|-----------|
| C | -2.580155 | -0.137450 | -0.381328 |
| F | -2.275643 | -1.224950 | -1.094091 |
| F | -3.170404 | 0.743753  | -1.179650 |
| F | -3.445272 | -0.497164 | 0.570307  |
| C | -1.314689 | 0.470484  | 0.245337  |
| H | 0.591387  | -0.714290 | 2.512187  |

**3aa**

M062X/BSI SCF energy: -1521.825383 a.u.

M062X/BSII SCF energy in solution: -1522.163253 a.u.

M062X/BSII free energy in solution: -1521.855209 a.u.

|   |           |           |           |
|---|-----------|-----------|-----------|
| S | -0.167539 | -0.898488 | -1.213801 |
| C | 0.198534  | 0.135746  | 0.253812  |
| C | 0.847211  | -2.371865 | -0.807535 |
| C | 1.356652  | 1.093942  | 0.083066  |
| C | 2.283972  | 1.237199  | 1.117023  |
| C | 3.361036  | 2.111199  | 0.981181  |
| C | 3.507528  | 2.862372  | -0.182845 |
| C | 2.571681  | 2.737840  | -1.209658 |
| C | 1.502192  | 1.857462  | -1.078289 |
| C | 2.266399  | -2.038760 | -0.431216 |
| C | 3.132561  | -1.426588 | -1.344552 |
| C | 4.425781  | -1.082558 | -0.966454 |
| C | 4.873379  | -1.350942 | 0.329250  |
| C | 4.021376  | -1.968020 | 1.240024  |
| C | 2.721201  | -2.306091 | 0.860651  |
| H | 0.395952  | -0.541430 | 1.091491  |
| H | 2.169250  | 0.648376  | 2.023696  |
| H | 4.086461  | 2.202133  | 1.784010  |
| H | 4.347455  | 3.541628  | -0.291221 |
| H | 2.678432  | 3.322730  | -2.118123 |
| H | 0.786037  | 1.747735  | -1.887254 |
| H | 0.354276  | -2.922200 | -0.002796 |
| H | 0.802960  | -2.979522 | -1.716072 |
| H | 2.780587  | -1.203599 | -2.349123 |
| H | 5.087550  | -0.602174 | -1.680936 |
| H | 5.882417  | -1.078422 | 0.623026  |
| H | 4.361232  | -2.181325 | 2.248998  |
| H | 2.051133  | -2.778297 | 1.574932  |
| C | -1.079506 | 0.875407  | 0.626227  |
| C | -2.225300 | -0.080771 | 1.037686  |

|   |           |           |           |
|---|-----------|-----------|-----------|
| F | -0.831546 | 1.660151  | 1.711294  |
| F | -1.448282 | 1.721478  | -0.374212 |
| C | -3.538144 | -0.112034 | 0.338269  |
| C | -4.627647 | -0.576024 | 1.088213  |
| C | -3.721450 | 0.245167  | -1.003841 |
| C | -5.888719 | -0.661114 | 0.513170  |
| H | -4.469853 | -0.857710 | 2.124380  |
| C | -4.984307 | 0.140164  | -1.579318 |
| H | -2.889219 | 0.583988  | -1.607877 |
| C | -6.067273 | -0.303276 | -0.823224 |
| H | -6.731380 | -1.006876 | 1.103032  |
| H | -5.121468 | 0.406829  | -2.622150 |
| H | -7.051344 | -0.374204 | -1.276245 |
| O | -1.993044 | -0.762157 | 2.014434  |

### 3bb

M062X/BSI SCF energy: -1053.154765 a.u.

M062X/BSII SCF energy in solution: -1053.354131

a.u.

M062X/BSII free energy in solution: -1053.133708

a.u.

|   |           |           |           |
|---|-----------|-----------|-----------|
| S | -0.310038 | -1.622639 | 0.114259  |
| C | -1.368204 | -0.645446 | 1.250164  |
| C | -2.646195 | -0.169658 | 0.616582  |
| C | -2.749664 | 1.135052  | 0.125685  |
| C | -3.931545 | 1.572825  | -0.472337 |
| C | -5.019761 | 0.711163  | -0.583257 |
| C | -4.922719 | -0.593141 | -0.096065 |
| C | -3.742690 | -1.030086 | 0.497201  |
| H | -1.569493 | -1.328584 | 2.079903  |
| H | -0.782612 | 0.193129  | 1.636873  |
| H | -1.893706 | 1.800440  | 0.209610  |
| H | -4.000834 | 2.588639  | -0.849670 |
| H | -5.941164 | 1.052747  | -1.044949 |
| H | -5.769193 | -1.268473 | -0.175837 |
| H | -3.666282 | -2.046517 | 0.876262  |
| C | 0.166310  | -0.314671 | -1.066401 |
| C | 1.084055  | 0.670182  | -0.377045 |
| C | 2.536809  | 0.348336  | -0.213850 |
| C | 3.338848  | 1.278599  | 0.457523  |
| C | 3.112834  | -0.827260 | -0.708108 |
| C | 4.696585  | 1.040542  | 0.631164  |
| H | 2.880562  | 2.186161  | 0.836726  |

|   |           |           |           |
|---|-----------|-----------|-----------|
| C | 4.473295  | -1.064862 | -0.531828 |
| H | 2.513730  | -1.568836 | -1.226653 |
| C | 5.265623  | -0.133072 | 0.135696  |
| H | 5.312365  | 1.767028  | 1.151891  |
| H | 4.913402  | -1.979210 | -0.916401 |
| H | 6.326286  | -0.321396 | 0.271119  |
| O | 0.621276  | 1.701612  | 0.082381  |
| H | -0.727211 | 0.213241  | -1.407845 |
| H | 0.633068  | -0.810048 | -1.918969 |

### TS1

M062X/BSI SCF energy: -1991.829875 a.u.

M062X/BSII SCF energy in solution: -1992.356068

a.u.

M062X/BSII free energy in solution: -1992.096141

a.u.

|   |           |           |           |
|---|-----------|-----------|-----------|
| S | -0.391444 | -1.777271 | -0.408518 |
| O | 0.201486  | -0.292952 | -0.088203 |
| C | -1.833810 | -1.412182 | -1.461087 |
| C | 0.872924  | -2.188554 | -1.657406 |
| C | -3.084876 | -1.298287 | -0.638849 |
| C | -3.489894 | -0.048805 | -0.163838 |
| C | -4.647559 | 0.057827  | 0.602610  |
| C | -5.394387 | -1.079886 | 0.904560  |
| C | -4.984489 | -2.328963 | 0.439357  |
| C | -3.830432 | -2.439282 | -0.330820 |
| C | 2.223317  | -2.193398 | -1.001392 |
| C | 2.962272  | -1.009371 | -0.914430 |
| C | 4.196058  | -1.007525 | -0.270588 |
| C | 4.696276  | -2.184204 | 0.285270  |
| C | 3.960962  | -3.365570 | 0.199388  |
| C | 2.724212  | -3.370193 | -0.438871 |
| H | -1.570905 | -0.484134 | -1.979895 |
| H | -1.867230 | -2.251743 | -2.165190 |
| H | -2.892664 | 0.827342  | -0.400612 |
| H | -4.966711 | 1.029726  | 0.965625  |
| H | -6.297014 | -0.994616 | 1.501816  |
| H | -5.564935 | -3.215605 | 0.673692  |
| H | -3.508289 | -3.409347 | -0.701324 |
| H | 0.575145  | -3.171238 | -2.035579 |
| H | 0.773102  | -1.438409 | -2.446957 |
| H | 2.564339  | -0.092869 | -1.340834 |
| H | 4.765333  | -0.085921 | -0.202037 |

|   |           |           |           |
|---|-----------|-----------|-----------|
| H | 5.659275  | -2.180391 | 0.786328  |
| H | 4.349887  | -4.283011 | 0.629260  |
| H | 2.144600  | -4.287347 | -0.504678 |
| O | -1.023838 | 1.731658  | -1.662308 |
| O | -0.935280 | -0.296453 | 1.903415  |
| O | -0.755383 | 1.906551  | 0.577604  |
| C | 1.163485  | 0.872214  | 1.735741  |
| C | 0.382557  | 3.433980  | -0.860686 |
| F | 0.899730  | 1.698403  | 2.739045  |
| F | 1.863070  | 1.523191  | 0.804639  |
| F | 1.938465  | -0.119821 | 2.199408  |
| F | 0.750134  | 4.027859  | 0.276308  |
| F | -0.188860 | 4.361665  | -1.640915 |
| F | 1.500420  | 3.024127  | -1.485224 |
| C | -0.125825 | 0.237328  | 1.193961  |
| C | -0.568017 | 2.232312  | -0.644044 |

**IM1<sup>+</sup>**

M062X/BSI SCF energy: -1465.658573 a.u.

M062X/BSII SCF energy in solution: -1465.994703 a.u.

M062X/BSII free energy in solution: -1465.758262 a.u.

|   |           |           |           |
|---|-----------|-----------|-----------|
| S | 0.294536  | -1.439791 | -0.045963 |
| O | 0.074695  | 0.165473  | -0.423646 |
| C | -1.091139 | -2.135026 | -1.017031 |
| C | 1.768006  | -1.681284 | -1.087238 |
| C | -2.349863 | -1.530130 | -0.467983 |
| C | -2.891704 | -0.390647 | -1.070246 |
| C | -3.995334 | 0.236985  | -0.496100 |
| C | -4.556063 | -0.271653 | 0.673999  |
| C | -4.018643 | -1.411732 | 1.271024  |
| C | -2.914131 | -2.038893 | 0.704920  |
| C | 2.920252  | -0.955994 | -0.453940 |
| C | 3.196351  | 0.366223  | -0.813204 |
| C | 4.251232  | 1.041373  | -0.204475 |
| C | 5.021253  | 0.403377  | 0.766217  |
| C | 4.740852  | -0.913175 | 1.130337  |
| C | 3.690493  | -1.593323 | 0.522507  |
| H | -0.896959 | -1.892578 | -2.064913 |
| H | -2.451674 | -0.000238 | -1.984080 |
| H | -4.414893 | 1.122095  | -0.963346 |
| H | -5.413382 | 0.220412  | 1.122191  |

|   |           |           |           |
|---|-----------|-----------|-----------|
| H | -4.456372 | -1.808836 | 2.181023  |
| H | -2.483629 | -2.920441 | 1.173246  |
| H | 1.898398  | -2.769386 | -1.104375 |
| H | 1.503948  | -1.321500 | -2.085555 |
| H | 2.594093  | 0.859401  | -1.571327 |
| H | 4.470975  | 2.065471  | -0.488343 |
| H | 5.841950  | 0.932258  | 1.240399  |
| H | 5.340180  | -1.410097 | 1.886237  |
| H | 3.466244  | -2.620685 | 0.798114  |
| O | -0.916825 | 0.580492  | 1.588693  |
| C | -0.630164 | 2.371578  | -0.038442 |
| F | -1.310884 | 2.372831  | -1.180776 |
| F | 0.596171  | 2.832476  | -0.272905 |
| F | -1.237203 | 3.150365  | 0.838736  |
| C | -0.540372 | 0.940172  | 0.523170  |
| H | -1.013327 | -3.215091 | -0.850804 |

**IM2**

M062X/BSI SCF energy: -1991.855107 a.u.

M062X/BSII SCF energy in solution: -1992.380235 a.u.

M062X/BSII free energy in solution: -1992.120442 a.u.

|   |           |           |           |
|---|-----------|-----------|-----------|
| S | -0.299040 | 0.059096  | -0.366653 |
| O | 1.350189  | -0.806978 | -0.444032 |
| C | 0.384529  | 1.415570  | -1.429596 |
| C | -0.880057 | -1.211964 | -1.559430 |
| C | 1.616530  | 2.017316  | -0.822375 |
| C | 2.880836  | 1.613369  | -1.258960 |
| C | 4.026762  | 2.138563  | -0.667320 |
| C | 3.913942  | 3.079311  | 0.355159  |
| C | 2.653761  | 3.491570  | 0.786664  |
| C | 1.507240  | 2.959581  | 0.203675  |
| C | -1.446458 | -2.368085 | -0.785646 |
| C | -0.617866 | -3.425242 | -0.398416 |
| C | -1.140339 | -4.487402 | 0.334772  |
| C | -2.488633 | -4.495559 | 0.688583  |
| C | -3.314441 | -3.436492 | 0.313666  |
| C | -2.795529 | -2.372703 | -0.418676 |
| H | 0.584067  | 0.949831  | -2.398133 |
| H | -0.432073 | 2.130472  | -1.524322 |
| H | 2.963329  | 0.872989  | -2.049575 |
| H | 5.005422  | 1.813299  | -1.006117 |



|                                                  |           |           |           |    |           |           |           |
|--------------------------------------------------|-----------|-----------|-----------|----|-----------|-----------|-----------|
| H                                                | 4.807258  | 3.491087  | 0.814558  | C  | 3.789474  | -3.558074 | 0.427335  |
| H                                                | 2.563318  | 4.225663  | 1.581119  | C  | 2.475426  | -3.710284 | 0.868014  |
| H                                                | 0.522067  | 3.262536  | 0.546776  | C  | 1.436206  | -3.072745 | 0.197934  |
| H                                                | -1.619885 | -0.716117 | -2.186388 | H  | 0.667988  | 1.183531  | -2.782614 |
| H                                                | -0.004144 | -1.486534 | -2.146518 | H  | 1.909395  | 3.160723  | -1.966688 |
| H                                                | 0.434538  | -3.410418 | -0.669062 | H  | 1.872368  | 5.375294  | -0.852980 |
| H                                                | -0.495551 | -5.309737 | 0.628245  | H  | -0.140463 | 6.103999  | 0.398670  |
| H                                                | -2.895627 | -5.325691 | 1.257714  | H  | -2.123540 | 4.615650  | 0.538595  |
| H                                                | -4.363635 | -3.439043 | 0.591986  | H  | -2.086100 | 2.399418  | -0.580854 |
| H                                                | -3.429134 | -1.536317 | -0.700197 | H  | -0.368308 | -1.984720 | -1.523376 |
| O                                                | -2.098767 | 0.779234  | -0.549359 | H  | 0.839481  | -1.252572 | -2.637070 |
| O                                                | 1.910520  | -0.079999 | 1.631943  | H  | 3.234835  | -1.531884 | -2.244961 |
| O                                                | -1.639629 | 2.310083  | 1.044005  | H  | 5.084624  | -2.659305 | -1.042542 |
| C                                                | 3.387796  | -1.539786 | 0.423817  | H  | 4.599156  | -4.050344 | 0.956434  |
| C                                                | -3.902691 | 1.999422  | 0.305077  | H  | 2.258216  | -4.321518 | 1.737866  |
| F                                                | 4.042562  | -1.177822 | -0.683641 | H  | 0.415638  | -3.191527 | 0.548551  |
| F                                                | 3.068539  | -2.834273 | 0.303306  | O  | 2.313569  | -0.154605 | 1.428287  |
| F                                                | 4.205517  | -1.402686 | 1.461285  | C  | 4.129547  | 0.931764  | 0.226999  |
| F                                                | -4.231201 | 2.848276  | 1.274198  | F  | 4.859640  | 0.713243  | 1.306543  |
| F                                                | -4.607714 | 0.875131  | 0.472280  | F  | 4.039966  | 2.242454  | 0.007972  |
| F                                                | -4.263888 | 2.537020  | -0.865595 | F  | 4.714682  | 0.366601  | -0.825789 |
| C                                                | 2.111927  | -0.696546 | 0.618355  | C  | 2.716899  | 0.355364  | 0.434163  |
| C                                                | -2.390333 | 1.702895  | 0.312218  | H  | -1.049910 | 0.954952  | -2.333178 |
|                                                  |           |           |           | C  | -2.039766 | -2.403739 | 0.745501  |
|                                                  |           |           |           | C  | -2.111933 | -1.074910 | 0.693257  |
|                                                  |           |           |           | C  | -2.055861 | -0.191777 | 1.873588  |
|                                                  |           |           |           | C  | -2.775315 | 1.008025  | 1.848800  |
|                                                  |           |           |           | C  | -1.278504 | -0.508020 | 2.994611  |
|                                                  |           |           |           | C  | -2.732809 | 1.872306  | 2.938784  |
|                                                  |           |           |           | H  | -3.372234 | 1.258593  | 0.976218  |
|                                                  |           |           |           | C  | -1.241244 | 0.359157  | 4.081763  |
|                                                  |           |           |           | H  | -0.690022 | -1.419886 | 3.006683  |
|                                                  |           |           |           | C  | -1.967488 | 1.549171  | 4.058061  |
|                                                  |           |           |           | H  | -3.299401 | 2.797831  | 2.914146  |
|                                                  |           |           |           | H  | -0.632906 | 0.109489  | 4.945246  |
|                                                  |           |           |           | H  | -1.931980 | 2.224972  | 4.906593  |
|                                                  |           |           |           | O  | -2.210874 | -0.474564 | -0.536574 |
|                                                  |           |           |           | F  | -1.930001 | -3.132391 | 1.838274  |
|                                                  |           |           |           | F  | -2.077248 | -3.172984 | -0.336506 |
|                                                  |           |           |           | Si | -3.549296 | -0.677394 | -1.613897 |
|                                                  |           |           |           | C  | -4.122486 | 1.048491  | -2.026416 |
|                                                  |           |           |           | H  | -3.326080 | 1.643833  | -2.485504 |
|                                                  |           |           |           | H  | -4.949299 | 0.998522  | -2.743893 |
|                                                  |           |           |           | H  | -4.480729 | 1.579695  | -1.138453 |
| <b>IM2-2a<sup>+</sup></b>                        |           |           |           |    |           |           |           |
| M062X/BSI SCF energy: -2457.411496 a.u.          |           |           |           |    |           |           |           |
| M062X/BSII SCF energy in solution: -2457.977273  |           |           |           |    |           |           |           |
| a.u.                                             |           |           |           |    |           |           |           |
| M062X/BSII free energy in solution: -2457.526906 |           |           |           |    |           |           |           |
| a.u.                                             |           |           |           |    |           |           |           |
| S                                                | 0.405995  | 0.084305  | -0.697615 |    |           |           |           |
| O                                                | 2.009745  | 0.568286  | -0.710439 |    |           |           |           |
| C                                                | -0.070851 | 1.291694  | -1.984074 |    |           |           |           |
| C                                                | 0.614360  | -1.511020 | -1.598947 |    |           |           |           |
| C                                                | -0.093697 | 2.651459  | -1.350667 |    |           |           |           |
| C                                                | 1.027309  | 3.483106  | -1.420350 |    |           |           |           |
| C                                                | 1.004428  | 4.726610  | -0.794099 |    |           |           |           |
| C                                                | -0.127389 | 5.134886  | -0.090146 |    |           |           |           |
| C                                                | -1.242242 | 4.300769  | -0.011193 |    |           |           |           |
| C                                                | -1.225032 | 3.059782  | -0.638636 |    |           |           |           |
| C                                                | 1.707419  | -2.286645 | -0.925518 |    |           |           |           |
| C                                                | 3.024864  | -2.144210 | -1.372277 |    |           |           |           |
| C                                                | 4.063757  | -2.777712 | -0.694083 |    |           |           |           |

|   |           |           |           |
|---|-----------|-----------|-----------|
| C | -2.861178 | -1.529819 | -3.122268 |
| H | -2.529975 | -2.547777 | -2.895966 |
| H | -3.623848 | -1.588542 | -3.906262 |
| H | -2.010464 | -0.972401 | -3.531000 |
| C | -4.869479 | -1.650623 | -0.728881 |
| H | -5.780758 | -1.645976 | -1.337171 |
| H | -4.587149 | -2.693320 | -0.559211 |
| H | -5.113669 | -1.195362 | 0.236956  |

**IM2B-2b<sup>+</sup>**

M062X/BSI SCF energy: -2259.006261 a.u.

M062X/BSII SCF energy in solution: -2259.500954 a.u.

M062X/BSII free energy in solution: -2259.034169 a.u.

|   |           |           |           |
|---|-----------|-----------|-----------|
| S | 0.589581  | -0.254844 | -0.837259 |
| O | 1.706179  | -1.365194 | -0.219416 |
| C | 1.522282  | 0.126863  | -2.378637 |
| C | -0.573359 | -1.515720 | -1.407688 |
| C | 2.849891  | 0.673625  | -1.949456 |
| C | 3.952538  | -0.181267 | -1.865735 |
| C | 5.152930  | 0.283838  | -1.332128 |
| C | 5.251585  | 1.600136  | -0.885041 |
| C | 4.154911  | 2.457138  | -0.979286 |
| C | 2.954222  | 1.995510  | -1.509346 |
| C | -1.502976 | -2.011446 | -0.325774 |
| C | -1.261233 | -1.857838 | 1.038539  |
| C | -2.177494 | -2.346119 | 1.969933  |
| C | -3.327292 | -3.003195 | 1.544385  |
| C | -3.562276 | -3.173752 | 0.179503  |
| C | -2.657586 | -2.676150 | -0.751370 |
| H | 1.592949  | -0.809012 | -2.938251 |
| H | 3.863847  | -1.208009 | -2.209958 |
| H | 6.005972  | -0.383563 | -1.263702 |
| H | 6.184794  | 1.960517  | -0.464021 |
| H | 4.232468  | 3.482913  | -0.633384 |
| H | 2.090945  | 2.653872  | -1.571155 |
| H | -1.124306 | -1.023593 | -2.218151 |
| H | 0.045575  | -2.309587 | -1.840311 |
| H | -0.371146 | -1.353975 | 1.407282  |
| H | -1.983968 | -2.210260 | 3.029198  |
| H | -4.038773 | -3.382343 | 2.271031  |
| H | -4.458848 | -3.682317 | -0.161254 |

|    |           |           |           |
|----|-----------|-----------|-----------|
| H  | -2.849012 | -2.791032 | -1.814931 |
| O  | 2.519594  | 0.202424  | 1.221291  |
| C  | 3.508778  | -2.011257 | 1.153937  |
| F  | 2.835136  | -2.936173 | 1.834412  |
| F  | 4.463279  | -1.510679 | 1.920010  |
| F  | 4.054578  | -2.584187 | 0.085301  |
| C  | 2.541374  | -0.885521 | 0.740587  |
| H  | 0.891576  | 0.847950  | -2.905495 |
| C  | -1.197163 | 1.978438  | -1.542642 |
| C  | -1.959507 | 1.416657  | -0.581245 |
| C  | -3.262680 | 0.747125  | -0.834185 |
| C  | -4.123075 | 0.491553  | 0.239865  |
| C  | -3.650357 | 0.357860  | -2.123989 |
| C  | -5.351611 | -0.128723 | 0.026563  |
| H  | -3.823713 | 0.777489  | 1.242653  |
| C  | -4.876362 | -0.263776 | -2.332838 |
| H  | -2.988847 | 0.523836  | -2.968938 |
| C  | -5.732227 | -0.508355 | -1.258673 |
| H  | -6.009246 | -0.321700 | 0.868657  |
| H  | -5.161429 | -0.564527 | -3.336182 |
| H  | -6.687629 | -0.996925 | -1.423038 |
| O  | -1.577082 | 1.386399  | 0.715813  |
| Si | -1.010649 | 2.704250  | 1.642857  |
| C  | 0.707182  | 3.232172  | 1.120724  |
| H  | 1.147742  | 3.838646  | 1.921057  |
| H  | 1.362592  | 2.368213  | 0.967301  |
| H  | 0.705776  | 3.840777  | 0.211471  |
| C  | -2.247267 | 4.087403  | 1.426458  |
| H  | -3.249320 | 3.772570  | 1.734736  |
| H  | -1.964414 | 4.958292  | 2.026822  |
| H  | -2.296851 | 4.406348  | 0.379907  |
| C  | -0.977289 | 1.992916  | 3.363733  |
| H  | -0.660151 | 2.746830  | 4.091521  |
| H  | -1.964064 | 1.625614  | 3.662651  |
| H  | -0.271835 | 1.156811  | 3.420224  |
| H  | -1.530748 | 2.019298  | -2.572082 |
| H  | -0.276240 | 2.496497  | -1.293687 |

**IM2A-2b<sup>+</sup>**

M062X/BSI SCF energy: -22559.00936 a.u.

M062X/BSII SCF energy in solution: -2259.504223 a.u.

M062X/BSII free energy in solution: -2259.036666 a.u.

|   |           |           |           |
|---|-----------|-----------|-----------|
| S | 0.293219  | -0.102678 | -0.582358 |
| O | 1.810609  | 0.602546  | -0.694448 |
| C | -0.352327 | 0.848467  | -2.001547 |
| C | 0.713534  | -1.747918 | -1.306498 |
| C | -0.620673 | 2.251411  | -1.545078 |
| C | 0.370651  | 3.229537  | -1.661947 |
| C | 0.125695  | 4.520936  | -1.203198 |
| C | -1.100784 | 4.833988  | -0.619668 |
| C | -2.087852 | 3.856371  | -0.495971 |
| C | -1.848992 | 2.565653  | -0.957106 |
| C | 1.954518  | -2.262718 | -0.640063 |
| C | 3.203747  | -1.977109 | -1.199463 |
| C | 4.367528  | -2.367858 | -0.541140 |
| C | 4.285802  | -3.048370 | 0.672207  |
| C | 3.040520  | -3.341466 | 1.227098  |
| C | 1.876224  | -2.944836 | 0.577128  |
| H | 0.413237  | 0.770042  | -2.778728 |
| H | 1.326376  | 2.980193  | -2.114804 |
| H | 0.893279  | 5.281833  | -1.300998 |
| H | -1.288034 | 5.841331  | -0.261091 |
| H | -3.043187 | 4.098736  | -0.041094 |
| H | -2.611638 | 1.796528  | -0.866771 |
| H | -0.174931 | -2.349875 | -1.097518 |
| H | 0.832659  | -1.586470 | -2.381271 |
| H | 3.261297  | -1.440832 | -2.142946 |
| H | 5.335005  | -2.138984 | -0.976465 |
| H | 5.192644  | -3.350275 | 1.186664  |
| H | 2.976008  | -3.872784 | 2.171135  |
| H | 0.903546  | -3.152054 | 1.015855  |
| O | 2.269964  | 0.125144  | 1.484576  |
| C | 3.878070  | 1.346650  | 0.129625  |
| F | 4.673479  | 1.295570  | 1.183989  |
| F | 3.594898  | 2.617260  | -0.153380 |
| F | 4.495547  | 0.809541  | -0.918808 |
| C | 2.569659  | 0.594434  | 0.435067  |
| H | -1.251003 | 0.309886  | -2.309867 |
| C | -1.702236 | -2.771226 | 1.196378  |
| C | -1.998946 | -1.491943 | 0.948748  |
| C | -2.116217 | -0.433877 | 1.979988  |
| C | -3.027988 | 0.611032  | 1.794037  |
| C | -1.328384 | -0.459069 | 3.137142  |
| C | -3.168484 | 1.602986  | 2.760674  |
| H | -3.634307 | 0.637324  | 0.893064  |

|    |           |           |           |
|----|-----------|-----------|-----------|
| C  | -1.468642 | 0.535684  | 4.100207  |
| H  | -0.591165 | -1.246407 | 3.268046  |
| C  | -2.389888 | 1.566652  | 3.916104  |
| H  | -3.886328 | 2.403523  | 2.610922  |
| H  | -0.849161 | 0.513341  | 4.991260  |
| H  | -2.495010 | 2.342564  | 4.667888  |
| O  | -2.207465 | -1.029894 | -0.333063 |
| Si | -3.422294 | -1.654683 | -1.380922 |
| C  | -4.200795 | -0.159880 | -2.184123 |
| H  | -3.491260 | 0.427559  | -2.775634 |
| H  | -4.996801 | -0.488166 | -2.862262 |
| H  | -4.653921 | 0.500586  | -1.437072 |
| C  | -2.562372 | -2.733343 | -2.637802 |
| H  | -2.058998 | -3.582872 | -2.163979 |
| H  | -3.287706 | -3.133044 | -3.355003 |
| H  | -1.816056 | -2.165784 | -3.204578 |
| C  | -4.677604 | -2.582291 | -0.360784 |
| H  | -5.554523 | -2.791628 | -0.983538 |
| H  | -4.297019 | -3.533795 | 0.019088  |
| H  | -5.010628 | -1.982296 | 0.493307  |
| H  | -1.567148 | -3.119715 | 2.213575  |
| H  | -1.617387 | -3.495147 | 0.390639  |

## TS2

M062X/BSI SCF energy: -1991.817189 a.u.

M062X/BSII SCF energy in solution: -1992.343726 a.u.

M062X/BSII free energy in solution: -1992.090487 a.u.

|   |           |           |           |
|---|-----------|-----------|-----------|
| S | -0.093327 | 0.186646  | -0.179701 |
| O | -1.824670 | 0.333498  | -0.387867 |
| C | 0.354917  | -1.166973 | -1.123788 |
| C | 0.224226  | 1.600239  | -1.284308 |
| C | -0.175487 | -2.437800 | -0.529287 |
| C | -1.311678 | -3.040329 | -1.082227 |
| C | -1.843106 | -4.196813 | -0.517028 |
| C | -1.253590 | -4.754988 | 0.615772  |
| C | -0.125129 | -4.157224 | 1.175255  |
| C | 0.415339  | -3.008235 | 0.603450  |
| C | -0.128890 | 2.884061  | -0.591359 |
| C | -1.410902 | 3.426022  | -0.716052 |
| C | -1.730412 | 4.612988  | -0.061528 |
| C | -0.775115 | 5.257463  | 0.722398  |

|   |           |           |           |
|---|-----------|-----------|-----------|
| C | 0.502389  | 4.713885  | 0.854109  |
| C | 0.825354  | 3.528182  | 0.201135  |
| H | 0.073968  | -1.007788 | -2.168304 |
| H | 1.788096  | -1.156644 | -1.030077 |
| H | -1.781176 | -2.592333 | -1.954325 |
| H | -2.723123 | -4.656183 | -0.956747 |
| H | -1.671219 | -5.652754 | 1.060645  |
| H | 0.339274  | -4.590133 | 2.055923  |
| H | 1.301305  | -2.549552 | 1.037049  |
| H | 1.289570  | 1.522052  | -1.509551 |
| H | -0.367470 | 1.411601  | -2.183728 |
| H | -2.154237 | 2.917413  | -1.323956 |
| H | -2.725067 | 5.034885  | -0.165002 |
| H | -1.025437 | 6.182988  | 1.231512  |
| H | 1.247761  | 5.214222  | 1.464133  |
| H | 1.816424  | 3.093512  | 0.301518  |
| O | 2.651856  | 0.659705  | 0.312335  |
| O | -2.179108 | -0.751544 | 1.577748  |
| O | 2.971894  | -1.213090 | -0.901785 |
| C | -4.045518 | -0.161988 | 0.159894  |
| C | 4.842589  | -0.292504 | 0.176771  |
| F | -4.245536 | -0.894883 | -0.936495 |
| F | -4.394483 | 1.096201  | -0.107197 |
| F | -4.812486 | -0.627243 | 1.134969  |
| F | 5.562558  | -0.172947 | -0.945798 |
| F | 5.169515  | -1.458434 | 0.745580  |
| F | 5.198156  | 0.688372  | 1.003359  |
| C | -2.563716 | -0.238029 | 0.569354  |
| C | 3.336270  | -0.245584 | -0.145409 |

**TS3A-2a**

M062X/BSI SCF energy: -2983.571163 a.u.

M062X/BSII SCF energy in solution: -2984.331717

a.u.

M062X/BSII free energy in solution: -2983.855954

a.u.

|   |           |           |           |
|---|-----------|-----------|-----------|
| S | 1.362893  | 0.210151  | -0.660624 |
| O | 2.725620  | 1.122407  | -1.048507 |
| C | 0.225066  | 1.298456  | -1.584780 |
| C | 1.636628  | -1.178075 | -1.852128 |
| C | -0.308456 | 2.393800  | -0.707475 |
| C | 0.546460  | 3.351731  | -0.150235 |
| C | 0.033920  | 4.333974  | 0.691813  |

|   |           |           |           |
|---|-----------|-----------|-----------|
| C | -1.332019 | 4.372170  | 0.974491  |
| C | -2.185008 | 3.427950  | 0.407626  |
| C | -1.676887 | 2.436348  | -0.429781 |
| C | 3.053108  | -1.653854 | -1.733006 |
| C | 4.047729  | -1.051294 | -2.510170 |
| C | 5.382354  | -1.410235 | -2.337464 |
| C | 5.726049  | -2.380117 | -1.398005 |
| C | 4.734566  | -2.996137 | -0.635366 |
| C | 3.402018  | -2.631195 | -0.797015 |
| H | 0.813875  | 1.648789  | -2.438583 |
| H | -0.564257 | 0.632451  | -1.938464 |
| H | 1.610000  | 3.337471  | -0.374270 |
| H | 0.701850  | 5.072052  | 1.124193  |
| H | -1.728353 | 5.139351  | 1.632251  |
| H | -3.250161 | 3.451795  | 0.616820  |
| H | -2.360975 | 1.704183  | -0.854424 |
| H | 0.894137  | -1.918574 | -1.542116 |
| H | 1.395765  | -0.778219 | -2.840963 |
| H | 3.774923  | -0.293448 | -3.239832 |
| H | 6.150503  | -0.931087 | -2.935854 |
| H | 6.766202  | -2.659003 | -1.261996 |
| H | 4.999280  | -3.758805 | 0.089865  |
| H | 2.632019  | -3.113554 | -0.203749 |
| O | -4.964596 | -1.199961 | -0.667797 |
| O | 3.852781  | 0.256457  | 0.730737  |
| O | -4.611865 | 1.019541  | -0.990068 |
| C | 4.897324  | 1.941123  | -0.672919 |
| C | -6.811559 | 0.139781  | -1.160609 |
| F | 4.464949  | 3.196359  | -0.551979 |
| F | 5.215029  | 1.727337  | -1.946202 |
| F | 5.968864  | 1.772108  | 0.082324  |
| F | -7.507328 | -0.192667 | -0.055357 |
| F | -7.243264 | -0.670403 | -2.145525 |
| F | -7.177478 | 1.386111  | -1.491453 |
| C | 3.789148  | 0.975189  | -0.214395 |
| C | -5.285702 | -0.016782 | -0.920412 |
| C | 0.432514  | -2.864835 | 1.201621  |
| C | -0.033496 | -1.619849 | 1.345711  |
| F | 0.235471  | -3.584971 | 0.106050  |
| F | 1.155826  | -3.545644 | 2.071346  |
| C | 0.201112  | -0.759938 | 2.528173  |
| C | -0.098709 | 0.605637  | 2.426949  |
| C | 0.708689  | -1.247737 | 3.742750  |
| C | 0.123893  | 1.466244  | 3.497897  |

|    |           |           |           |
|----|-----------|-----------|-----------|
| H  | -0.527881 | 0.992070  | 1.508738  |
| C  | 0.926964  | -0.382625 | 4.809883  |
| H  | 0.924445  | -2.301133 | 3.868241  |
| C  | 0.642975  | 0.977167  | 4.693752  |
| H  | -0.116118 | 2.520141  | 3.392812  |
| H  | 1.317831  | -0.778685 | 5.741978  |
| H  | 0.816984  | 1.646198  | 5.530536  |
| O  | -0.680764 | -1.094843 | 0.258975  |
| Si | -2.430461 | -1.345499 | -0.009850 |
| C  | -2.744091 | -3.160893 | 0.334759  |
| H  | -3.823983 | -3.331290 | 0.307061  |
| H  | -2.278058 | -3.802441 | -0.418567 |
| H  | -2.378165 | -3.466018 | 1.320684  |
| C  | -3.132292 | -0.302764 | 1.380358  |
| H  | -2.609025 | -0.570582 | 2.305636  |
| H  | -3.013389 | 0.770233  | 1.218765  |
| H  | -4.193650 | -0.519733 | 1.506145  |
| C  | -2.410529 | -1.035103 | -1.860288 |
| H  | -3.163361 | -1.688819 | -2.306749 |
| H  | -2.666156 | -0.012779 | -2.144977 |
| H  | -1.432779 | -1.307689 | -2.275252 |

**TS2A**

M062X/BSI SCF energy: -1991.815387 a.u.

M062X/BSII SCF energy in solution: -1992.34001  
a.u.

M062X/BSII free energy in solution: -1992.08502  
a.u.

|   |           |           |           |
|---|-----------|-----------|-----------|
| S | -0.825214 | -1.508600 | -0.301126 |
| O | 0.128688  | -0.279285 | 0.420058  |
| C | -2.099807 | -0.549867 | -0.979152 |
| C | 0.267746  | -1.798223 | -1.752236 |
| C | -3.405575 | -0.714751 | -0.277137 |
| C | -3.504539 | -0.486482 | 1.100847  |
| C | -4.729953 | -0.604747 | 1.751217  |
| C | -5.877618 | -0.926533 | 1.028743  |
| C | -5.789750 | -1.136578 | -0.346761 |
| C | -4.561779 | -1.038901 | -0.995301 |
| C | 1.662052  | -2.089555 | -1.290113 |
| C | 2.578924  | -1.038174 | -1.185202 |
| C | 3.846643  | -1.274085 | -0.655975 |
| C | 4.201095  | -2.555933 | -0.239403 |
| C | 3.290985  | -3.606637 | -0.356106 |

|   |           |           |           |
|---|-----------|-----------|-----------|
| C | 2.021261  | -3.374115 | -0.875338 |
| H | -1.690161 | 0.744786  | -0.865312 |
| H | -2.119306 | -0.730379 | -2.056753 |
| H | -2.620050 | -0.199413 | 1.667296  |
| H | -4.789363 | -0.430085 | 2.821071  |
| H | -6.834988 | -1.009598 | 1.533409  |
| H | -6.679171 | -1.387106 | -0.916856 |
| H | -4.492991 | -1.215642 | -2.065239 |
| H | -0.209877 | -2.638822 | -2.264692 |
| H | 0.193360  | -0.880144 | -2.340982 |
| H | 2.285087  | -0.041143 | -1.503972 |
| H | 4.554528  | -0.455742 | -0.566501 |
| H | 5.187442  | -2.737152 | 0.176277  |
| H | 3.569131  | -4.605626 | -0.035860 |
| H | 1.302427  | -4.185892 | -0.954884 |
| O | 0.461006  | 1.374763  | -1.947368 |
| O | 1.170925  | -1.728426 | 1.839718  |
| O | -1.317990 | 1.919423  | -0.666753 |
| C | 1.842357  | 0.596938  | 1.750258  |
| C | 0.511558  | 3.375743  | -0.642776 |
| F | 1.122602  | 1.357217  | 2.574220  |
| F | 2.161518  | 1.324183  | 0.679078  |
| F | 2.954304  | 0.222285  | 2.365786  |
| F | 0.474289  | 3.432473  | 0.695698  |
| F | -0.139792 | 4.452753  | -1.107237 |
| F | 1.785807  | 3.473887  | -1.023347 |
| C | 1.026334  | -0.650229 | 1.351212  |
| C | -0.150305 | 2.080893  | -1.158777 |

**TS3B-2a<sup>+</sup>**

M062X/BSI SCF energy: -2457.394497 a.u.

M062X/BSII SCF energy in solution: -2457.960275  
a.u.

M062X/BSII free energy in solution: -2457.509416  
a.u.

|   |           |           |           |
|---|-----------|-----------|-----------|
| S | -0.552114 | 0.155435  | -0.650239 |
| O | -1.801792 | 1.392480  | -0.167490 |
| C | -1.542513 | -0.325588 | -2.149780 |
| C | 0.460698  | 1.510137  | -1.315416 |
| C | -2.913574 | -0.764335 | -1.733194 |
| C | -3.975983 | 0.141608  | -1.791804 |
| C | -5.236055 | -0.229982 | -1.328804 |
| C | -5.439307 | -1.510317 | -0.816726 |

|    |           |           |           |
|----|-----------|-----------|-----------|
| C  | -4.384407 | -2.421271 | -0.773433 |
| C  | -3.122843 | -2.049822 | -1.227762 |
| C  | 1.389905  | 2.110805  | -0.287987 |
| C  | 1.192808  | 2.001735  | 1.088636  |
| C  | 2.096464  | 2.592309  | 1.972734  |
| C  | 3.187643  | 3.305962  | 1.487616  |
| C  | 3.377155  | 3.429909  | 0.110593  |
| C  | 2.486412  | 2.830906  | -0.772296 |
| H  | -1.555539 | 0.571648  | -2.772292 |
| H  | -3.809296 | 1.139406  | -2.187565 |
| H  | -6.055817 | 0.480474  | -1.368775 |
| H  | -6.420398 | -1.800307 | -0.453958 |
| H  | -4.542800 | -3.420366 | -0.380326 |
| H  | -2.296688 | -2.754340 | -1.186729 |
| H  | 1.011656  | 1.093521  | -2.165710 |
| H  | -0.258891 | 2.237468  | -1.701717 |
| H  | 0.340362  | 1.463861  | 1.497785  |
| H  | 1.938217  | 2.494020  | 3.042012  |
| H  | 3.889743  | 3.762515  | 2.177995  |
| H  | 4.228912  | 3.981169  | -0.276043 |
| H  | 2.643250  | 2.908744  | -1.845042 |
| O  | -2.688332 | -0.054501 | 1.342934  |
| C  | -3.649837 | 2.134347  | 1.075228  |
| F  | -3.030177 | 3.078740  | 1.788034  |
| F  | -4.671128 | 1.668318  | 1.782090  |
| F  | -4.118721 | 2.695254  | -0.039255 |
| C  | -2.658516 | 0.994715  | 0.763405  |
| H  | -0.978593 | -1.111380 | -2.652008 |
| C  | 0.972482  | -1.541183 | -1.213122 |
| C  | 2.036047  | -1.201927 | -0.355608 |
| C  | 3.242506  | -0.479656 | -0.759980 |
| C  | 4.120964  | -0.079743 | 0.263277  |
| C  | 3.566090  | -0.200586 | -2.100912 |
| C  | 5.299321  | 0.581238  | -0.048282 |
| H  | 3.868532  | -0.288111 | 1.297058  |
| C  | 4.747640  | 0.465876  | -2.398990 |
| H  | 2.909113  | -0.491058 | -2.909273 |
| C  | 5.614655  | 0.856664  | -1.379472 |
| H  | 5.969167  | 0.890093  | 0.747416  |
| H  | 4.991644  | 0.680521  | -3.433939 |
| H  | 6.534844  | 1.379148  | -1.621570 |
| O  | 1.851137  | -1.368395 | 0.921277  |
| Si | 1.241851  | -2.645456 | 1.960761  |
| C  | -0.573008 | -2.352396 | 2.222525  |

|   |           |           |           |
|---|-----------|-----------|-----------|
| H | -0.953017 | -3.077114 | 2.951689  |
| H | -0.743734 | -1.351354 | 2.629675  |
| H | -1.160803 | -2.451480 | 1.306914  |
| C | 1.697207  | -4.262778 | 1.162519  |
| H | 2.745081  | -4.251865 | 0.844654  |
| H | 1.582743  | -5.069551 | 1.894814  |
| H | 1.073276  | -4.498231 | 0.297295  |
| C | 2.218615  | -2.309796 | 3.506951  |
| H | 1.896403  | -2.975762 | 4.314265  |
| H | 3.288964  | -2.468447 | 3.343945  |
| H | 2.069672  | -1.278201 | 3.842462  |
| F | 1.150599  | -1.646012 | -2.532076 |
| F | 0.123917  | -2.503328 | -0.804695 |

### TS2B

M062X/BSI SCF energy: -1465.584628 a.u.

M062X/BSII SCF energy in solution: -1465.920493 a.u.

M062X/BSII free energy in solution: -1465.689872 a.u.

|   |           |           |           |
|---|-----------|-----------|-----------|
| S | 0.309462  | -1.149388 | 0.059480  |
| C | 1.623344  | -0.745946 | -0.897782 |
| C | -0.956556 | -1.722628 | -1.138529 |
| C | 2.998436  | -0.745131 | -0.315665 |
| C | 3.343157  | -1.448975 | 0.842022  |
| C | 4.643788  | -1.387341 | 1.333673  |
| C | 5.612371  | -0.638138 | 0.668697  |
| C | 5.275814  | 0.052423  | -0.493941 |
| C | 3.973863  | 0.005700  | -0.981803 |
| C | -2.335144 | -1.630399 | -0.560172 |
| C | -2.817220 | -2.636715 | 0.280103  |
| C | -4.094484 | -2.531521 | 0.823751  |
| C | -4.888893 | -1.424226 | 0.529372  |
| C | -4.408448 | -0.419531 | -0.309430 |
| C | -3.131404 | -0.519781 | -0.851905 |
| H | 1.498208  | -1.028301 | -1.948894 |
| H | 1.230283  | 0.558229  | -1.095238 |
| H | 2.609668  | -2.062612 | 1.358767  |
| H | 4.901845  | -1.939662 | 2.231375  |
| H | 6.626992  | -0.597947 | 1.051510  |
| H | 6.025566  | 0.634647  | -1.019981 |
| H | 3.707469  | 0.553179  | -1.882123 |
| H | -0.813715 | -1.118469 | -2.040324 |

|   |           |           |           |
|---|-----------|-----------|-----------|
| H | -0.636141 | -2.752682 | -1.334304 |
| H | -2.194676 | -3.499765 | 0.502845  |
| H | -4.469753 | -3.314158 | 1.474988  |
| H | -5.884721 | -1.344431 | 0.953843  |
| H | -5.026060 | 0.442249  | -0.540705 |
| H | -2.749251 | 0.260180  | -1.505842 |
| O | -0.602931 | 0.469267  | 0.403858  |
| O | 0.648643  | 1.661976  | -1.044781 |
| C | -0.964202 | 2.804261  | 0.345138  |
| F | -0.493829 | 3.885892  | -0.249767 |
| F | -0.813592 | 2.909737  | 1.659241  |
| F | -2.257793 | 2.666875  | 0.068450  |
| C | -0.217069 | 1.552489  | -0.162118 |

**TS2C**

M062X/BSI SCF energy: -2457.333293 a.u.

M062X/BSII SCF energy in solution: -2457.905355 a.u.

M062X/BSII free energy in solution: -2457.45101 a.u.

|   |           |           |           |
|---|-----------|-----------|-----------|
| S | -1.444760 | 0.328950  | -0.159318 |
| O | 0.414579  | 1.219228  | -1.869492 |
| C | -2.760413 | -0.340846 | 0.917034  |
| C | -1.601956 | -0.770558 | -1.654688 |
| C | -4.022027 | 0.276030  | 0.366217  |
| C | -4.935480 | -0.525377 | -0.325135 |
| C | -6.106965 | 0.030528  | -0.830263 |
| C | -6.364214 | 1.389499  | -0.657620 |
| C | -5.452533 | 2.193317  | 0.025104  |
| C | -4.282456 | 1.640727  | 0.536310  |
| C | -0.810339 | -2.036715 | -1.671060 |
| C | 0.432729  | -2.044608 | -2.306412 |
| C | 1.204215  | -3.203725 | -2.306339 |
| C | 0.729799  | -4.354111 | -1.679584 |
| C | -0.529499 | -4.357559 | -1.077504 |
| C | -1.306607 | -3.203190 | -1.080696 |
| H | -2.782704 | -1.427745 | 0.865363  |
| H | -4.731190 | -1.585460 | -0.453483 |
| H | -6.817401 | -0.597516 | -1.357765 |
| H | -7.276815 | 1.822180  | -1.055024 |
| H | -5.653488 | 3.250560  | 0.163380  |
| H | -3.577621 | 2.265294  | 1.079403  |
| H | -2.682071 | -0.951069 | -1.647660 |

|    |           |           |           |
|----|-----------|-----------|-----------|
| H  | -1.321429 | -0.088693 | -2.455003 |
| H  | 0.785341  | -1.139611 | -2.793238 |
| H  | 2.174549  | -3.206274 | -2.792634 |
| H  | 1.334133  | -5.255619 | -1.672324 |
| H  | -0.907984 | -5.261665 | -0.611563 |
| H  | -2.292616 | -3.204537 | -0.622697 |
| O  | 0.676547  | 2.480097  | -0.020921 |
| C  | 2.199675  | 2.777155  | -1.797401 |
| F  | 2.784966  | 2.010214  | -2.726664 |
| F  | 3.126579  | 3.071188  | -0.877808 |
| F  | 1.840969  | 3.926930  | -2.390001 |
| C  | 0.969712  | 2.080776  | -1.168030 |
| H  | -2.529822 | -0.002780 | 1.931434  |
| C  | 0.264695  | -2.263763 | 1.360206  |
| C  | 0.798037  | -1.171466 | 0.821057  |
| C  | 2.246105  | -0.973381 | 0.611468  |
| C  | 2.762105  | -0.393437 | -0.552883 |
| C  | 3.114474  | -1.316937 | 1.657215  |
| C  | 4.125579  | -0.135518 | -0.654502 |
| H  | 2.101895  | -0.135475 | -1.370759 |
| C  | 4.479450  | -1.077358 | 1.539112  |
| H  | 2.719650  | -1.760595 | 2.566265  |
| C  | 4.985334  | -0.474460 | 0.389805  |
| H  | 4.514491  | 0.331066  | -1.553690 |
| H  | 5.142631  | -1.345313 | 2.354953  |
| H  | 6.047897  | -0.269070 | 0.306759  |
| O  | -0.012788 | 0.007241  | 0.739934  |
| Si | 0.469714  | 1.432092  | 2.147284  |
| C  | -0.990636 | 2.578756  | 2.241459  |
| H  | -0.662459 | 3.421209  | 2.865515  |
| H  | -1.299749 | 2.987704  | 1.280239  |
| H  | -1.833212 | 2.108388  | 2.757051  |
| C  | 0.261515  | 0.183237  | 3.524727  |
| H  | 1.091103  | -0.519037 | 3.630886  |
| H  | 0.227028  | 0.783359  | 4.445031  |
| H  | -0.680365 | -0.371423 | 3.467443  |
| C  | 2.225266  | 2.044467  | 2.152707  |
| H  | 2.821017  | 1.624792  | 1.339551  |
| H  | 2.223150  | 3.130315  | 2.031041  |
| H  | 2.684690  | 1.775583  | 3.109365  |
| F  | 0.930187  | -3.371588 | 1.546233  |
| F  | -0.984762 | -2.375909 | 1.737269  |

**TS3A-2b**

M062X/BSI SCF energy: -2785.16722 a.u.  
M062X/BSII SCF energy in solution: -2785.856228 a.u.  
M062X/BSII free energy in solution: -2785.364694 a.u.

|   |           |           |           |
|---|-----------|-----------|-----------|
| S | 1.319536  | -0.094602 | -0.572332 |
| O | 2.697365  | 0.642800  | -1.215347 |
| C | 0.181080  | 0.819149  | -1.670234 |
| C | 1.503930  | -1.717397 | -1.423744 |
| C | -0.292110 | 2.088367  | -1.022657 |
| C | 0.603873  | 3.122233  | -0.730929 |
| C | 0.150439  | 4.277545  | -0.101017 |
| C | -1.197204 | 4.409310  | 0.234764  |
| C | -2.092093 | 3.384920  | -0.068031 |
| C | -1.643333 | 2.223701  | -0.694226 |
| C | 2.882254  | -2.238781 | -1.147472 |
| C | 3.918054  | -1.962031 | -2.044692 |
| C | 5.219573  | -2.361248 | -1.749648 |
| C | 5.486750  | -3.041544 | -0.563258 |
| C | 4.453105  | -3.324194 | 0.329627  |
| C | 3.153605  | -2.918615 | 0.042834  |
| H | 0.753562  | 0.968526  | -2.591454 |
| H | -0.636451 | 0.123129  | -1.862424 |
| H | 1.653102  | 3.031722  | -1.000850 |
| H | 0.849374  | 5.076557  | 0.124784  |
| H | -1.548230 | 5.312175  | 0.724875  |
| H | -3.144466 | 3.482914  | 0.181002  |
| H | -2.358657 | 1.435144  | -0.921141 |
| H | 0.706881  | -2.318662 | -0.976821 |
| H | 1.311393  | -1.535897 | -2.484603 |
| H | 3.703605  | -1.428521 | -2.966848 |
| H | 6.022183  | -2.139842 | -2.445814 |
| H | 6.501457  | -3.350713 | -0.332864 |
| H | 4.661133  | -3.854922 | 1.253135  |
| H | 2.345037  | -3.116386 | 0.742975  |
| O | -4.896877 | -1.312617 | -0.209666 |
| O | 3.882455  | 0.237748  | 0.689051  |
| O | -4.626346 | 0.815847  | -0.949312 |
| C | 4.897300  | 1.456392  | -1.148787 |
| C | -6.785318 | -0.175466 | -0.975934 |
| F | 4.465200  | 2.680684  | -1.450563 |
| F | 5.221449  | 0.834297  | -2.279605 |
| F | 5.966097  | 1.548014  | -0.375720 |

|    |           |           |           |
|----|-----------|-----------|-----------|
| F  | -7.495011 | -0.316655 | 0.159819  |
| F  | -7.156563 | -1.180569 | -1.790323 |
| F  | -7.188023 | 0.964711  | -1.551682 |
| C  | 3.788578  | 0.686229  | -0.408071 |
| C  | -5.261468 | -0.211953 | -0.687728 |
| C  | 0.082483  | -2.763508 | 2.197175  |
| C  | -0.089068 | -1.491914 | 1.807646  |
| C  | 0.451139  | -0.323041 | 2.560445  |
| C  | -0.032300 | 0.965484  | 2.304408  |
| C  | 1.478831  | -0.477442 | 3.501426  |
| C  | 0.476945  | 2.067697  | 2.986881  |
| H  | -0.808498 | 1.102604  | 1.560168  |
| C  | 1.983218  | 0.622672  | 4.186895  |
| H  | 1.908746  | -1.457727 | 3.681687  |
| C  | 1.483621  | 1.900229  | 3.934961  |
| H  | 0.082979  | 3.057222  | 2.773974  |
| H  | 2.779863  | 0.483457  | 4.911124  |
| H  | 1.884518  | 2.758138  | 4.465865  |
| O  | -0.732271 | -1.190920 | 0.635015  |
| Si | -2.494045 | -1.446725 | 0.398734  |
| C  | -2.880022 | -3.194644 | 0.966201  |
| H  | -3.932341 | -3.392196 | 0.744695  |
| H  | -2.276235 | -3.935444 | 0.431270  |
| H  | -2.722446 | -3.336878 | 2.039114  |
| C  | -3.128095 | -0.191641 | 1.645118  |
| H  | -2.496860 | -0.215979 | 2.540592  |
| H  | -3.136810 | 0.828378  | 1.253225  |
| H  | -4.148742 | -0.451424 | 1.931273  |
| C  | -2.452888 | -1.420351 | -1.482273 |
| H  | -3.215208 | -2.123800 | -1.825783 |
| H  | -2.695679 | -0.451626 | -1.924284 |
| H  | -1.483969 | -1.771292 | -1.854802 |
| H  | 0.573365  | -3.008366 | 3.130984  |
| H  | -0.286775 | -3.580665 | 1.588633  |

**TS3B-2b<sup>+</sup>**

M062X/BSI SCF energy: -2259.005251 a.u.  
M062X/BSII SCF energy in solution: -2259.500965 a.u.  
M062X/BSII free energy in solution: -2259.032717 a.u.

|   |          |           |           |
|---|----------|-----------|-----------|
| S | 0.560380 | -0.121713 | -0.710252 |
| O | 1.724034 | -1.319385 | -0.139708 |



|   |           |           |           |                                                 |           |           |           |
|---|-----------|-----------|-----------|-------------------------------------------------|-----------|-----------|-----------|
| C | 1.540294  | 0.221786  | -2.252761 | H                                               | -5.963439 | -0.887304 | 0.650987  |
| C | -0.537799 | -1.456699 | -1.265737 | H                                               | -4.896889 | -0.939641 | -3.511900 |
| C | 2.901437  | 0.697570  | -1.849430 | H                                               | -6.434499 | -1.607471 | -1.681523 |
| C | 3.965338  | -0.207105 | -1.799776 | O                                               | -2.029688 | 1.698930  | 0.711248  |
| C | 5.208502  | 0.204361  | -1.324586 | Si                                              | -1.273059 | 3.061690  | 1.449166  |
| C | 5.392097  | 1.521801  | -0.908362 | C                                               | 0.572788  | 2.810569  | 1.521879  |
| C | 4.336767  | 2.431283  | -0.975580 | H                                               | 1.006807  | 3.583862  | 2.167015  |
| C | 3.092462  | 2.021065  | -1.443900 | H                                               | 0.826697  | 1.839285  | 1.956320  |
| C | -1.430716 | -1.982455 | -0.166778 | H                                               | 1.063761  | 2.887332  | 0.546556  |
| C | -1.299365 | -1.646316 | 1.179691  | C                                               | -1.763866 | 4.564431  | 0.457794  |
| C | -2.175284 | -2.185359 | 2.123153  | H                                               | -2.853596 | 4.652020  | 0.401947  |
| C | -3.175896 | -3.067159 | 1.728708  | H                                               | -1.378252 | 5.469315  | 0.939381  |
| C | -3.303170 | -3.411090 | 0.382144  | H                                               | -1.369756 | 4.534436  | -0.562179 |
| C | -2.438181 | -2.868670 | -0.560979 | C                                               | -2.021352 | 3.045751  | 3.151601  |
| H | 1.560132  | -0.724795 | -2.797453 | H                                               | -1.586241 | 3.837589  | 3.769934  |
| H | 3.812252  | -1.232943 | -2.123022 | H                                               | -3.103391 | 3.203561  | 3.109683  |
| H | 6.029649  | -0.503970 | -1.278774 | H                                               | -1.835579 | 2.089184  | 3.650539  |
| H | 6.359397  | 1.842901  | -0.535104 | H                                               | -1.227144 | 1.427552  | -2.512419 |
| H | 4.482661  | 3.459343  | -0.659926 | H                                               | -0.349829 | 2.393204  | -1.205188 |
| H | 2.265222  | 2.725747  | -1.494760 |                                                 |           |           |           |
| H | -1.117632 | -1.045401 | -2.097788 | <b>IM3<sup>+</sup></b>                          |           |           |           |
| H | 0.130185  | -2.229650 | -1.657846 | M062X/BSI SCF energy: -939.06194 a.u.           |           |           |           |
| H | -0.528550 | -0.960525 | 1.524320  | M062X/BSII SCF energy in solution: -939.220655  |           |           |           |
| H | -2.067867 | -1.911344 | 3.167895  | a.u.                                            |           |           |           |
| H | -3.856558 | -3.483672 | 2.464338  | M062X/BSII free energy in solution: -939.022368 |           |           |           |
| H | -4.085271 | -4.093393 | 0.063797  | a.u.                                            |           |           |           |
| H | -2.544764 | -3.122709 | -1.612551 |                                                 |           |           |           |
| O | 2.630370  | 0.190019  | 1.299514  | S                                               | 0.051979  | 0.135345  | 0.000330  |
| C | 3.526857  | -2.047808 | 1.178672  | C                                               | -1.348946 | -0.757761 | 0.000098  |
| F | 2.843421  | -2.967176 | 1.861479  | C                                               | 1.349037  | -1.179991 | 0.000240  |
| F | 4.511065  | -1.589275 | 1.937864  | C                                               | -2.667398 | -0.233114 | 0.000003  |
| F | 4.045938  | -2.629287 | 0.098695  | C                                               | -3.727064 | -1.168401 | -0.000104 |
| C | 2.583767  | -0.890880 | 0.792100  | C                                               | -5.039157 | -0.725969 | -0.000168 |
| H | 0.967007  | 0.966393  | -2.804205 | C                                               | -5.301112 | 0.644516  | -0.000143 |
| C | -1.098627 | 1.648573  | -1.459893 | C                                               | -4.258988 | 1.582908  | -0.000055 |
| C | -2.094032 | 1.346269  | -0.567880 | C                                               | -2.947638 | 1.154610  | 0.000017  |
| C | -3.292169 | 0.540003  | -0.901733 | C                                               | 2.697023  | -0.517705 | 0.000058  |
| C | -4.170375 | 0.167478  | 0.125502  | C                                               | 3.322302  | -0.200587 | -1.208327 |
| C | -3.569188 | 0.137890  | -2.216626 | C                                               | 4.569326  | 0.418105  | -1.207713 |
| C | -5.295349 | -0.599726 | -0.154753 | C                                               | 5.193950  | 0.726658  | -0.000268 |
| H | -3.958933 | 0.472197  | 1.144208  | C                                               | 4.569543  | 0.418307  | 1.207341  |
| C | -4.692453 | -0.634680 | -2.490622 | C                                               | 3.322520  | -0.200387 | 1.208279  |
| H | -2.920456 | 0.431209  | -3.035484 | H                                               | -1.235540 | -1.843779 | -0.000035 |
| C | -5.557476 | -1.006455 | -1.462157 | H                                               | -3.496085 | -2.229428 | -0.000128 |

|   |           |           |           |
|---|-----------|-----------|-----------|
| H | -5.855917 | -1.438917 | -0.000242 |
| H | -6.329376 | 0.992491  | -0.000200 |
| H | -4.485190 | 2.643181  | -0.000050 |
| H | -2.139369 | 1.881308  | 0.000073  |
| H | 1.183609  | -1.780792 | 0.896611  |
| H | 1.183406  | -1.780880 | -0.896034 |
| H | 2.831713  | -0.446806 | -2.146623 |
| H | 5.055215  | 0.655350  | -2.148837 |
| H | 6.167780  | 1.206351  | -0.000398 |
| H | 5.055602  | 0.655710  | 2.148337  |
| H | 2.832099  | -0.446453 | 2.146703  |

**IM3-2a**

M062X/BSI SCF energy: -2983.575449 a.u.

M062X/BSII SCF energy in solution: -2984.330616 a.u.

M062X/BSII free energy in solution: -2983.85332 a.u.

|   |           |           |           |
|---|-----------|-----------|-----------|
| S | 1.279586  | 0.127858  | -0.666213 |
| O | 2.721839  | 0.899301  | -1.133261 |
| C | 0.272231  | 1.194759  | -1.757443 |
| C | 1.494632  | -1.398301 | -1.690955 |
| C | -0.190829 | 2.420448  | -1.026195 |
| C | 0.720569  | 3.384723  | -0.580317 |
| C | 0.268505  | 4.485749  | 0.140722  |
| C | -1.092236 | 4.635972  | 0.411386  |
| C | -2.001539 | 3.684878  | -0.046215 |
| C | -1.553093 | 2.575647  | -0.760715 |
| C | 2.886960  | -1.930769 | -1.525024 |
| C | 3.904591  | -1.482074 | -2.373200 |
| C | 5.217974  | -1.900088 | -2.171715 |
| C | 5.518311  | -2.774684 | -1.129169 |
| C | 4.503432  | -3.238212 | -0.293299 |
| C | 3.192537  | -2.814992 | -0.486291 |
| H | 0.922414  | 1.398053  | -2.613887 |
| H | -0.560565 | 0.566070  | -2.073721 |
| H | 1.780944  | 3.278341  | -0.794345 |
| H | 0.978499  | 5.228101  | 0.491048  |
| H | -1.440462 | 5.496072  | 0.974841  |
| H | -3.062131 | 3.797063  | 0.157929  |
| H | -2.268528 | 1.829488  | -1.099777 |
| H | 0.722717  | -2.064472 | -1.298551 |
| H | 1.265939  | -1.104890 | -2.718933 |

|    |           |           |           |
|----|-----------|-----------|-----------|
| H  | 3.666636  | -0.798251 | -3.183510 |
| H  | 6.003430  | -1.541032 | -2.828933 |
| H  | 6.542152  | -3.098535 | -0.970614 |
| H  | 4.733046  | -3.926218 | 0.513838  |
| H  | 2.405490  | -3.180447 | 0.165383  |
| O  | -4.630658 | -1.099934 | -0.388010 |
| O  | 3.767755  | 0.162977  | 0.749279  |
| O  | -4.624100 | 1.048940  | -1.099994 |
| C  | 4.935816  | 1.608474  | -0.809159 |
| C  | -6.655434 | -0.203759 | -1.120079 |
| F  | 4.610172  | 2.901594  | -0.771783 |
| F  | 5.216401  | 1.283749  | -2.068320 |
| F  | 6.003439  | 1.406442  | -0.055315 |
| F  | -7.310447 | -0.422950 | 0.031163  |
| F  | -6.892348 | -1.254550 | -1.918203 |
| F  | -7.193994 | 0.873499  | -1.694940 |
| C  | 3.758015  | 0.774599  | -0.272240 |
| C  | -5.144637 | -0.029802 | -0.859733 |
| C  | 0.278680  | -2.588519 | 1.458423  |
| C  | -0.146488 | -1.318240 | 1.459943  |
| F  | 0.029921  | -3.434974 | 0.463062  |
| F  | 1.002769  | -3.195679 | 2.387373  |
| C  | 0.164632  | -0.361335 | 2.553567  |
| C  | -0.010381 | 1.006872  | 2.304030  |
| C  | 0.619569  | -0.754710 | 3.821852  |
| C  | 0.287347  | 1.956684  | 3.276143  |
| H  | -0.408128 | 1.322301  | 1.345731  |
| C  | 0.913369  | 0.198568  | 4.792177  |
| H  | 0.734507  | -1.803348 | 4.066216  |
| C  | 0.756659  | 1.557520  | 4.525323  |
| H  | 0.143444  | 3.010100  | 3.054353  |
| H  | 1.261261  | -0.127945 | 5.767434  |
| H  | 0.986290  | 2.295590  | 5.287462  |
| O  | -0.788077 | -0.884493 | 0.346477  |
| Si | -2.703956 | -1.100668 | 0.073683  |
| C  | -2.870628 | -2.860128 | 0.729911  |
| H  | -3.921921 | -3.067173 | 0.945740  |
| H  | -2.527724 | -3.593929 | -0.006199 |
| H  | -2.303104 | -3.018912 | 1.650782  |
| C  | -3.066825 | 0.192352  | 1.408442  |
| H  | -2.522668 | -0.083328 | 2.317700  |
| H  | -2.750383 | 1.201139  | 1.134962  |
| H  | -4.133195 | 0.223123  | 1.646844  |
| C  | -2.390436 | -1.042348 | -1.795867 |

H -3.104472 -1.730902 -2.259515  
H -2.570554 -0.061701 -2.245412  
H -1.386035 -1.384954 -2.058091

**IM3-2b<sup>+</sup>**

M062X/BSI SCF energy: -2259.042435 a.u.

M062X/BSII SCF energy in solution: -2259.545346

a.u.

M062X/BSII free energy in solution: -2459.070325

a.u.

S 0.450947 0.255266 -1.151584  
O 2.668896 -1.240884 -1.736101  
C 1.426592 1.405369 -2.206191  
C -0.409725 -0.779224 -2.400310  
C 2.311991 2.258113 -1.345777  
C 3.514618 1.736115 -0.856928  
C 4.310967 2.504473 -0.013690  
C 3.913082 3.793147 0.345266  
C 2.720165 4.317925 -0.147515  
C 1.919261 3.551810 -0.993199  
C -1.712320 -1.289597 -1.853837  
C -1.726781 -2.198926 -0.787138  
C -2.941115 -2.642186 -0.273202  
C -4.143381 -2.196610 -0.826960  
C -4.130201 -1.305455 -1.897403  
C -2.916434 -0.846048 -2.405494  
H 1.988865 0.720450 -2.842983  
H 3.794642 0.719622 -1.121750  
H 5.240950 2.095611 0.369483  
H 4.535192 4.389658 1.005316  
H 2.413291 5.323129 0.123259  
H 0.991020 3.959459 -1.386523  
H -0.545026 -0.157539 -3.289481  
H 0.327376 -1.565979 -2.579520  
H -0.781170 -2.554014 -0.382746  
H -2.951455 -3.342175 0.556791  
H -5.088847 -2.547587 -0.424767  
H -5.062877 -0.956687 -2.329737  
H -2.901500 -0.141253 -3.232860  
O 1.437143 -2.699743 -0.532896  
C 3.640216 -2.252771 0.175596  
F 3.224587 -2.406106 1.443630  
F 4.508021 -1.228510 0.171258

F 4.333350 -3.359808 -0.147513  
C 2.453728 -2.039773 -0.800926  
H 0.706339 1.980336 -2.793937  
C -0.873253 1.398983 -0.650088  
C -1.740408 0.814048 0.430988  
C -3.175649 0.975591 0.443057  
C -3.914911 0.289822 1.429131  
C -3.841645 1.787654 -0.496645  
C -5.294065 0.410215 1.465779  
H -3.399590 -0.341452 2.145209  
C -5.219971 1.912386 -0.439801  
H -3.295887 2.332585 -1.257926  
C -5.944494 1.219706 0.532744  
H -5.864287 -0.125497 2.216449  
H -5.733663 2.543428 -1.156371  
H -7.025645 1.312792 0.563099  
O -1.204562 0.185248 1.385238  
Si 0.175899 -0.094784 2.488096  
C 1.685133 0.798616 1.875818  
H 2.329720 0.982804 2.744123  
H 2.263742 0.218515 1.153958  
H 1.448654 1.779213 1.444272  
C -0.511233 0.669273 4.034148  
H -1.438480 0.176316 4.340682  
H 0.214071 0.570153 4.848797  
H -0.712961 1.735195 3.889894  
C 0.266210 -1.940929 2.503685  
H 0.914611 -2.262353 3.326276  
H -0.728438 -2.365759 2.673926  
H 0.678309 -2.331129 1.567699  
H -1.435883 1.699739 -1.533314  
H -0.362506 2.277640 -0.228260

**IM4-2a<sup>+</sup>**

M062X/BSI SCF energy: -1930.815064 a.u.

M062X/BSII SCF energy in solution: -1931.203505

a.u.

M062X/BSII free energy in solution: -1930.788973

a.u.

S -1.260542 -1.787460 -0.496118  
C 0.195738 -2.130549 0.224486  
C -2.489467 -2.126052 0.833600  
C 1.453744 -2.077806 -0.439913

|    |           |           |           |
|----|-----------|-----------|-----------|
| C  | 2.598574  | -2.422569 | 0.311255  |
| C  | 3.851416  | -2.390725 | -0.281216 |
| C  | 3.971048  | -2.005687 | -1.616895 |
| C  | 2.843425  | -1.650556 | -2.369538 |
| C  | 1.589899  | -1.679742 | -1.789993 |
| C  | -3.720904 | -1.314502 | 0.534331  |
| C  | -4.117752 | -0.281691 | 1.385877  |
| C  | -5.233637 | 0.492727  | 1.071542  |
| C  | -5.947703 | 0.248941  | -0.099651 |
| C  | -5.556310 | -0.784030 | -0.950634 |
| C  | -4.451388 | -1.567047 | -0.631146 |
| H  | 0.178214  | -2.448740 | 1.267976  |
| H  | 2.481599  | -2.715754 | 1.350723  |
| H  | 4.732389  | -2.655277 | 0.293112  |
| H  | 4.952346  | -1.976991 | -2.080897 |
| H  | 2.955729  | -1.349755 | -3.405365 |
| H  | 0.716301  | -1.404020 | -2.373649 |
| H  | -2.685033 | -3.200531 | 0.805342  |
| H  | -2.033735 | -1.855766 | 1.787566  |
| H  | -3.550312 | -0.081490 | 2.289898  |
| H  | -5.539227 | 1.292230  | 1.739126  |
| H  | -6.810451 | 0.859084  | -0.347869 |
| H  | -6.113650 | -0.983372 | -1.860400 |
| H  | -4.154282 | -2.379487 | -1.291081 |
| C  | 0.086817  | 0.573649  | 1.682156  |
| C  | 0.923837  | 0.804330  | 0.662591  |
| F  | -1.232003 | 0.549763  | 1.521259  |
| F  | 0.406429  | 0.392645  | 2.948349  |
| C  | 2.395455  | 0.854639  | 0.757500  |
| C  | 3.105453  | 1.272704  | -0.375414 |
| C  | 3.109455  | 0.473156  | 1.905764  |
| C  | 4.496807  | 1.314766  | -0.361699 |
| H  | 2.559763  | 1.547442  | -1.271788 |
| C  | 4.498683  | 0.522016  | 1.912623  |
| H  | 2.590242  | 0.126609  | 2.790778  |
| C  | 5.199100  | 0.939715  | 0.781223  |
| H  | 5.032119  | 1.637037  | -1.249641 |
| H  | 5.037669  | 0.223015  | 2.806216  |
| H  | 6.284093  | 0.970055  | 0.791258  |
| O  | 0.381788  | 0.958608  | -0.572094 |
| Si | -0.631386 | 2.251836  | -1.058674 |
| C  | -0.702755 | 3.496496  | 0.331764  |
| H  | -1.207842 | 4.402619  | -0.020305 |
| H  | -1.255640 | 3.123670  | 1.199162  |

|   |           |          |           |
|---|-----------|----------|-----------|
| H | 0.302125  | 3.783504 | 0.659730  |
| C | 0.185929  | 2.963412 | -2.578073 |
| H | 0.401945  | 2.180576 | -3.312682 |
| H | -0.470375 | 3.699407 | -3.054847 |
| H | 1.126210  | 3.464646 | -2.327014 |
| C | -2.310241 | 1.546631 | -1.467988 |
| H | -2.963196 | 2.341312 | -1.846956 |
| H | -2.245861 | 0.774294 | -2.241562 |
| H | -2.788535 | 1.115438 | -0.582558 |

#### IM4

M062X/BSI SCF energy: -1465.270814 a.u.

M062X/BSII SCF energy in solution: -1465.613713 a.u.

M062X/BSII free energy in solution: -1465.387361 a.u.

|   |           |           |           |
|---|-----------|-----------|-----------|
| S | 0.495520  | -1.231671 | 0.024080  |
| O | -1.045740 | 0.819765  | -0.833942 |
| C | -1.006170 | -0.635893 | -0.804010 |
| C | 1.726230  | -0.427356 | -1.075108 |
| C | -2.274146 | -1.250329 | -0.258409 |
| C | -3.322615 | -1.473199 | -1.154304 |
| C | -4.516794 | -2.038727 | -0.714331 |
| C | -4.665018 | -2.393719 | 0.624345  |
| C | -3.619186 | -2.177787 | 1.520902  |
| C | -2.428861 | -1.603704 | 1.084482  |
| C | 3.095217  | -0.607202 | -0.478685 |
| C | 3.605084  | 0.345383  | 0.408395  |
| C | 4.860328  | 0.169919  | 0.985153  |
| C | 5.614915  | -0.963428 | 0.683661  |
| C | 5.110140  | -1.919296 | -0.196249 |
| C | 3.854282  | -1.742471 | -0.773176 |
| H | -0.920799 | -0.868260 | -1.867262 |
| H | -3.198365 | -1.205480 | -2.200397 |
| H | -5.325036 | -2.207666 | -1.418655 |
| H | -5.592996 | -2.838713 | 0.970034  |
| H | -3.731531 | -2.452928 | 2.564828  |
| H | -1.626911 | -1.415648 | 1.791384  |
| H | 1.658902  | -0.878942 | -2.068174 |
| H | 1.473623  | 0.633328  | -1.143755 |
| H | 3.011772  | 1.226884  | 0.640907  |
| H | 5.250282  | 0.917147  | 1.669464  |
| H | 6.593884  | -1.099784 | 1.132786  |

|   |           |           |           |
|---|-----------|-----------|-----------|
| H | 5.694733  | -2.802192 | -0.435695 |
| H | 3.458835  | -2.485498 | -1.461335 |
| O | -1.254841 | 1.122494  | 1.414831  |
| C | -0.856395 | 2.995530  | -0.038848 |
| F | -1.661020 | 3.414680  | -1.015574 |
| F | 0.409201  | 3.156882  | -0.446051 |
| F | -1.053392 | 3.750963  | 1.033760  |
| C | -1.097539 | 1.512895  | 0.293560  |

**IM4-2a**

M062X/BSI SCF energy: -2048.359802 a.u.

M062X/BSII SCF energy in solution: -2048.8799

a.u.

M062X/BSII free energy in solution: -2048.536564

a.u.

|   |           |           |           |
|---|-----------|-----------|-----------|
| S | 0.118875  | -0.083139 | -0.908589 |
| O | -1.576267 | -1.247499 | -0.571802 |
| C | 0.556902  | -1.420940 | -2.076861 |
| C | -1.016139 | 0.996083  | -1.883788 |
| C | 1.543017  | -2.328839 | -1.399429 |
| C | 1.114404  | -3.194329 | -0.386862 |
| C | 2.037530  | -3.988344 | 0.286555  |
| C | 3.390682  | -3.925838 | -0.047919 |
| C | 3.818892  | -3.070077 | -1.061028 |
| C | 2.897404  | -2.268782 | -1.732433 |
| C | -2.082443 | 1.605423  | -1.020152 |
| C | -3.383057 | 1.096810  | -1.045364 |
| C | -4.365669 | 1.641091  | -0.222563 |
| C | -4.055641 | 2.701917  | 0.627006  |
| C | -2.761011 | 3.218250  | 0.650195  |
| C | -1.777858 | 2.670384  | -0.169127 |
| H | -0.378367 | -1.916208 | -2.331346 |
| H | 0.058157  | -3.237111 | -0.130785 |
| H | 1.701571  | -4.657242 | 1.072647  |
| H | 4.109108  | -4.546136 | 0.479016  |
| H | 4.870594  | -3.021724 | -1.325527 |
| H | 3.226632  | -1.587722 | -2.512279 |
| H | -0.356015 | 1.742809  | -2.328456 |
| H | -1.434503 | 0.360086  | -2.667041 |
| H | -3.615821 | 0.258945  | -1.695914 |
| H | -5.372167 | 1.234565  | -0.243723 |
| H | -4.820796 | 3.125715  | 1.270055  |
| H | -2.515583 | 4.046925  | 1.306960  |

|   |           |           |           |
|---|-----------|-----------|-----------|
| H | -0.766269 | 3.070329  | -0.146459 |
| O | -1.717456 | -0.469236 | 1.554160  |
| C | -3.218548 | -2.166032 | 0.795982  |
| F | -3.704508 | -2.153250 | 2.037270  |
| F | -2.820536 | -3.418237 | 0.523090  |
| F | -4.226317 | -1.876170 | -0.041686 |
| C | -2.051318 | -1.170975 | 0.619322  |
| H | 0.980431  | -0.918856 | -2.948684 |
| C | 1.903774  | 3.003858  | -1.071079 |
| C | 1.919487  | 1.778753  | -0.540822 |
| C | 2.325755  | 1.460510  | 0.843370  |
| C | 2.827397  | 0.181182  | 1.115072  |
| C | 2.196219  | 2.381489  | 1.891028  |
| C | 3.206117  | -0.165871 | 2.407917  |
| H | 2.926250  | -0.540084 | 0.308828  |
| C | 2.583999  | 2.030054  | 3.180291  |
| H | 1.779760  | 3.365657  | 1.705320  |
| C | 3.089219  | 0.758047  | 3.444677  |
| H | 3.593455  | -1.161690 | 2.601272  |
| H | 2.476611  | 2.751568  | 3.984191  |
| H | 3.382691  | 0.486901  | 4.453889  |
| O | 1.591575  | 0.750785  | -1.392075 |
| F | 2.295865  | 4.103308  | -0.459114 |
| F | 1.530468  | 3.261921  | -2.310753 |

**IM4-2b<sup>+</sup>**

M062X/BSI SCF energy: -1323.835853 a.u.

M062X/BSII SCF energy in solution: -1324.096692

a.u.

M062X/BSII free energy in solution: -1323.759584

a.u.

|   |           |           |           |
|---|-----------|-----------|-----------|
| S | 1.142417  | -1.312970 | 0.059900  |
| C | 2.649719  | -1.248875 | -0.984031 |
| C | 0.103587  | -2.464191 | -0.942553 |
| C | 3.652974  | -0.296775 | -0.398622 |
| C | 4.399919  | -0.655944 | 0.727885  |
| C | 5.326310  | 0.234399  | 1.261643  |
| C | 5.512126  | 1.486163  | 0.674196  |
| C | 4.768472  | 1.847797  | -0.446770 |
| C | 3.837347  | 0.959530  | -0.980809 |
| C | -1.342834 | -2.339938 | -0.567148 |
| C | -1.834181 | -2.981846 | 0.572669  |
| C | -3.159995 | -2.807061 | 0.953520  |

|                                                  |           |           |           |    |           |           |           |
|--------------------------------------------------|-----------|-----------|-----------|----|-----------|-----------|-----------|
| C                                                | -4.003807 | -1.990905 | 0.198337  | C  | -1.615248 | -1.925354 | 0.359260  |
| C                                                | -3.520688 | -1.357877 | -0.944158 | C  | -2.708167 | -2.223898 | -0.470583 |
| C                                                | -2.192009 | -1.531118 | -1.327123 | C  | -3.989325 | -2.296870 | 0.063512  |
| H                                                | 3.007125  | -2.283078 | -0.991143 | C  | -4.188588 | -2.069146 | 1.424708  |
| H                                                | 4.258920  | -1.635070 | 1.179239  | C  | -3.107993 | -1.759016 | 2.253531  |
| H                                                | 5.906992  | -0.049295 | 2.133435  | C  | -1.827222 | -1.676412 | 1.726215  |
| H                                                | 6.237866  | 2.177918  | 1.089978  | C  | 3.637068  | -1.467383 | -0.332145 |
| H                                                | 4.912507  | 2.819662  | -0.907769 | C  | 4.023696  | -0.644458 | -1.392200 |
| H                                                | 3.257233  | 1.233010  | -1.858264 | C  | 5.115044  | 0.211508  | -1.256909 |
| H                                                | 0.289697  | -2.204971 | -1.988262 | C  | 5.823195  | 0.256581  | -0.057988 |
| H                                                | 0.516233  | -3.452157 | -0.722000 | C  | 5.449169  | -0.571610 | 1.000073  |
| H                                                | -1.171924 | -3.609002 | 1.164152  | C  | 4.366302  | -1.435123 | 0.861010  |
| H                                                | -3.537300 | -3.305455 | 1.840876  | H  | -0.200062 | -2.283451 | -1.247457 |
| H                                                | -5.037637 | -1.853027 | 0.499450  | H  | -2.538217 | -2.396407 | -1.530041 |
| H                                                | -4.173878 | -0.725913 | -1.537675 | H  | -4.830797 | -2.530720 | -0.580352 |
| H                                                | -1.812310 | -1.040800 | -2.220226 | H  | -5.188485 | -2.131995 | 1.842489  |
| H                                                | 2.334861  | -0.962624 | -1.990631 | H  | -3.268060 | -1.577277 | 3.311007  |
| C                                                | 0.383960  | 0.283826  | -0.325048 | H  | -0.993550 | -1.430336 | 2.378077  |
| C                                                | -0.766569 | 0.533369  | 0.648523  | H  | 2.668940  | -3.393824 | -0.201186 |
| C                                                | -1.718680 | 1.630286  | 0.332365  | H  | 2.015468  | -2.337070 | -1.471459 |
| C                                                | -2.885224 | 1.707743  | 1.102946  | H  | 3.463957  | -0.670258 | -2.322616 |
| C                                                | -1.488825 | 2.557593  | -0.688942 | H  | 5.407038  | 0.846237  | -2.087720 |
| C                                                | -3.818007 | 2.704374  | 0.851549  | H  | 6.666739  | 0.931098  | 0.050622  |
| H                                                | -3.046563 | 0.972898  | 1.885091  | H  | 6.003301  | -0.547069 | 1.933138  |
| C                                                | -2.422038 | 3.562831  | -0.929206 | H  | 4.081580  | -2.082238 | 1.687913  |
| H                                                | -0.584614 | 2.511081  | -1.288496 | C  | -0.094059 | 0.055086  | -1.413032 |
| C                                                | -3.584583 | 3.633886  | -0.163757 | C  | -0.867338 | 0.759532  | -0.511649 |
| H                                                | -4.726297 | 2.759164  | 1.442654  | F  | 1.226169  | 0.153685  | -1.359333 |
| H                                                | -2.242912 | 4.289370  | -1.714803 | F  | -0.492337 | -0.339988 | -2.607634 |
| H                                                | -4.312693 | 4.415248  | -0.358228 | C  | -2.314395 | 0.924169  | -0.606464 |
| O                                                | -0.871611 | -0.148365 | 1.648188  | C  | -3.005964 | 1.288274  | 0.560560  |
| H                                                | 0.075546  | 0.289931  | -1.374137 | C  | -3.021061 | 0.755697  | -1.810795 |
| H                                                | 1.161525  | 1.043957  | -0.179944 | C  | -4.383956 | 1.456321  | 0.527678  |
| <b>TS4-2a<sup>+</sup></b>                        |           |           |           | H  | -2.456943 | 1.426920  | 1.485907  |
| M062X/BSI SCF energy: -1930.809069 a.u.          |           |           |           | C  | -4.396718 | 0.940051  | -1.834720 |
| M062X/BSII SCF energy in solution: -1931.195097  |           |           |           | H  | -2.503628 | 0.497119  | -2.725427 |
| a.u.                                             |           |           |           | C  | -5.081230 | 1.279090  | -0.667421 |
| M062X/BSII free energy in solution: -1930.780043 |           |           |           | H  | -4.916186 | 1.725206  | 1.434179  |
| a.u.                                             |           |           |           | H  | -4.936515 | 0.815447  | -2.767445 |
| S                                                | 1.106473  | -1.852138 | 0.715840  | H  | -6.158168 | 1.413128  | -0.690883 |
| C                                                | -0.296020 | -1.850942 | -0.250445 | O  | -0.266665 | 1.129344  | 0.606628  |
| C                                                | 2.432896  | -2.359606 | -0.462938 | Si | 0.895104  | 2.414060  | 0.795302  |
|                                                  |           |           |           | C  | 0.958800  | 3.309089  | -0.837759 |
|                                                  |           |           |           | H  | 1.563521  | 4.216332  | -0.732787 |

|   |           |          |           |
|---|-----------|----------|-----------|
| H | 1.407649  | 2.699111 | -1.627532 |
| H | -0.042172 | 3.614767 | -1.160741 |
| C | 0.158283  | 3.447427 | 2.155238  |
| H | 0.003371  | 2.849905 | 3.059284  |
| H | 0.823136  | 4.279125 | 2.410663  |
| H | -0.806132 | 3.865721 | 1.850286  |
| C | 2.511695  | 1.635838 | 1.277778  |
| H | 3.250048  | 2.416272 | 1.493801  |
| H | 2.402911  | 1.018239 | 2.174735  |
| H | 2.901886  | 1.012293 | 0.468453  |

**TS4A-2a**

M062X/BSI SCF energy: -2983.578737 a.u.

M062X/BSII SCF energy in solution: -2984.334588 a.u.

M062X/BSII free energy in solution: -2983.856598 a.u.

|   |           |           |           |
|---|-----------|-----------|-----------|
| S | -1.003025 | 0.947576  | 0.423039  |
| O | -1.594458 | 2.563636  | 0.161847  |
| C | 0.068618  | 1.430797  | 1.860721  |
| C | -2.541240 | 0.491903  | 1.293204  |
| C | 0.966176  | 2.564523  | 1.473032  |
| C | 0.560357  | 3.880626  | 1.717660  |
| C | 1.341582  | 4.946585  | 1.277263  |
| C | 2.536610  | 4.702311  | 0.602127  |
| C | 2.952039  | 3.391436  | 0.373102  |
| C | 2.167952  | 2.324959  | 0.802610  |
| C | -3.569721 | -0.100391 | 0.368357  |
| C | -3.898767 | 0.514998  | -0.843302 |
| C | -4.840755 | -0.065560 | -1.687743 |
| C | -5.476858 | -1.249177 | -1.318047 |
| C | -5.172262 | -1.849470 | -0.097669 |
| C | -4.215505 | -1.281426 | 0.739570  |
| H | -0.631589 | 1.699203  | 2.656716  |
| H | -0.373601 | 4.066417  | 2.240975  |
| H | 1.016121  | 5.965440  | 1.462528  |
| H | 3.144503  | 5.533818  | 0.259109  |
| H | 3.885209  | 3.191827  | -0.144380 |
| H | 2.502644  | 1.311413  | 0.606848  |
| H | -2.240694 | -0.201993 | 2.079940  |
| H | -2.864184 | 1.427436  | 1.760268  |
| H | -3.431772 | 1.453324  | -1.132329 |
| H | -5.080408 | 0.412217  | -2.632263 |

|    |           |           |           |
|----|-----------|-----------|-----------|
| H  | -6.209500 | -1.701156 | -1.979387 |
| H  | -5.665312 | -2.771071 | 0.195725  |
| H  | -3.954085 | -1.765480 | 1.677157  |
| O  | -0.091115 | 2.848007  | -1.521249 |
| C  | -1.698361 | 4.584052  | -1.019684 |
| F  | -1.053097 | 5.313771  | -1.916500 |
| F  | -1.755044 | 5.253511  | 0.129938  |
| F  | -2.946694 | 4.373930  | -1.444457 |
| C  | -0.992612 | 3.228991  | -0.836831 |
| H  | 0.573482  | 0.494480  | 2.098863  |
| C  | -1.187675 | -2.394563 | 2.331206  |
| C  | -0.984727 | -2.222180 | 1.019711  |
| C  | -1.686759 | -3.006951 | -0.024286 |
| C  | -1.768390 | -2.448316 | -1.306910 |
| C  | -2.278991 | -4.253900 | 0.211387  |
| C  | -2.457881 | -3.103039 | -2.322067 |
| H  | -1.287796 | -1.493065 | -1.498372 |
| C  | -2.964055 | -4.907879 | -0.809920 |
| H  | -2.198764 | -4.724481 | 1.184527  |
| C  | -3.064957 | -4.334175 | -2.075831 |
| H  | -2.524011 | -2.649434 | -3.306548 |
| H  | -3.417014 | -5.875236 | -0.614613 |
| H  | -3.603236 | -4.846484 | -2.867090 |
| O  | -0.163266 | -1.224368 | 0.625131  |
| Si | 1.750711  | -1.630506 | 0.068790  |
| C  | 1.532944  | -0.449206 | -1.391024 |
| H  | 2.286229  | 0.342410  | -1.392828 |
| H  | 1.711911  | -1.054567 | -2.288827 |
| H  | 0.546622  | 0.001412  | -1.492261 |
| C  | 2.363570  | -1.274430 | 1.822324  |
| H  | 3.142028  | -2.012940 | 2.045970  |
| H  | 2.830111  | -0.291202 | 1.927217  |
| H  | 1.579667  | -1.372571 | 2.574948  |
| C  | 1.425053  | -3.459484 | -0.243768 |
| H  | 2.382481  | -3.971788 | -0.362677 |
| H  | 0.888010  | -3.934583 | 0.581701  |
| H  | 0.840265  | -3.620076 | -1.154477 |
| O  | 4.399531  | 0.192609  | -0.108052 |
| O  | 3.587219  | -1.886338 | -0.505937 |
| C  | 5.849371  | -1.508094 | -0.933119 |
| F  | 6.359168  | -2.330490 | -0.001988 |
| F  | 6.727951  | -0.524343 | -1.131234 |
| F  | 5.748199  | -2.204996 | -2.071298 |
| C  | 4.480658  | -0.969422 | -0.469138 |

F -2.011040 -3.264934 2.898228  
F -0.634403 -1.616102 3.258463

**TS4-2a'**

M062X/BSI SCF energy: -2456.944127 a.u.

M062X/BSII SCF energy in solution: -2457.535285

a.u.

M062X/BSII free energy in solution: -2457.099008

a.u.

S 2.739249 0.318221 0.762893  
O -4.494556 0.323204 -0.418650  
C 3.207343 -1.264656 0.773988  
C 4.176900 1.141815 -0.036187  
C 2.431898 -2.336428 1.352352  
C 3.021775 -3.609723 1.429609  
C 2.327044 -4.672942 1.993700  
C 1.038155 -4.479458 2.483175  
C 0.434807 -3.221168 2.390966  
C 1.114366 -2.159258 1.819491  
C 4.150155 2.615133 0.261870  
C 3.660367 3.520430 -0.680357  
C 3.634013 4.882230 -0.391209  
C 4.090696 5.343989 0.839895  
C 4.576425 4.442448 1.785815  
C 4.605224 3.082878 1.497894  
H 4.156048 -1.511221 0.302652  
H 4.030321 -3.752873 1.051707  
H 2.792191 -5.651487 2.052020  
H 0.494839 -5.309460 2.923494  
H -0.580634 -3.075950 2.746026  
H 0.601895 -1.211130 1.667625  
H 5.069205 0.661649 0.371644  
H 4.105831 0.941562 -1.107508  
H 3.300012 3.157774 -1.637867  
H 3.253293 5.581354 -1.128455  
H 4.067919 6.405564 1.064309  
H 4.934175 4.799599 2.745985  
H 4.984070 2.376876 2.233174  
O -4.656809 1.333468 1.596193  
C -6.633262 0.934402 0.304968  
F -6.890592 1.714838 -0.752511  
F -7.296519 1.422172 1.350460  
F -7.115070 -0.285005 0.037721

C -5.118315 0.880898 0.573304  
C 1.280721 0.979980 -1.339234  
C 0.549812 -0.184800 -1.108563  
F 0.854089 2.161137 -0.910183  
F 2.155155 1.151131 -2.343688  
C 1.078269 -1.492788 -1.580986  
C 0.276310 -2.617469 -1.331114  
C 2.363995 -1.689343 -2.108822  
C 0.741223 -3.895324 -1.594288  
H -0.703792 -2.458708 -0.894207  
C 2.828596 -2.977648 -2.374125  
H 3.012074 -0.846832 -2.321116  
C 2.027520 -4.081285 -2.109441  
H 0.111420 -4.753428 -1.382046  
H 3.825218 -3.112493 -2.783273  
H 2.396087 -5.083297 -2.305914  
O -0.415691 -0.162765 -0.279499  
Si -2.678186 0.157174 -0.378530  
C -2.213042 1.972034 -0.319805  
H -3.092585 2.620749 -0.345980  
H -1.646445 2.195741 0.587311  
H -1.573235 2.215921 -1.171595  
C -2.644537 -0.666077 -2.065475  
H -3.067454 -1.675175 -2.005888  
H -3.283846 -0.096632 -2.748036  
H -1.649405 -0.740006 -2.507723  
C -2.540336 -0.935507 1.146865  
H -3.519324 -1.222682 1.538929  
H -1.977313 -1.840884 0.902898  
H -1.997796 -0.410394 1.938694

**TS4-2b**

M062X/BSI SCF energy: -2259.028458 a.u.

M062X/BSII SCF energy in solution: -2259.528328

a.u.

M062X/BSII free energy in solution: -2259.054906

a.u.

S 0.449233 0.747236 -1.261665  
O 1.412421 -2.034371 -1.959143  
C 1.359078 2.191036 -1.947098  
C -0.632781 0.328437 -2.689170  
C 2.477948 2.564059 -1.020543  
C 3.671816 1.837249 -1.052499



|   |           |           |           |
|---|-----------|-----------|-----------|
| C | 4.689703  | 2.128189  | -0.150994 |
| C | 4.520011  | 3.147088  | 0.787213  |
| C | 3.335316  | 3.880091  | 0.815860  |
| C | 2.313188  | 3.589507  | -0.086110 |
| C | -1.932488 | -0.286208 | -2.257639 |
| C | -1.961212 | -1.553368 | -1.662007 |
| C | -3.176053 | -2.102795 | -1.267429 |
| C | -4.365340 | -1.400962 | -1.473922 |
| C | -4.339344 | -0.147228 | -2.079585 |
| C | -3.123251 | 0.413030  | -2.465512 |
| H | 1.722443  | 1.823959  | -2.911810 |
| H | 3.791751  | 1.031917  | -1.773636 |
| H | 5.612758  | 1.557961  | -0.176338 |
| H | 5.313827  | 3.371031  | 1.492834  |
| H | 3.204978  | 4.677086  | 1.540695  |
| H | 1.388045  | 4.160296  | -0.070013 |
| H | -0.785873 | 1.257638  | -3.243796 |
| H | -0.006481 | -0.363359 | -3.258640 |
| H | -1.027660 | -2.084560 | -1.499876 |
| H | -3.197744 | -3.081600 | -0.798115 |
| H | -5.311174 | -1.833137 | -1.161325 |
| H | -5.262549 | 0.399377  | -2.244631 |
| H | -3.094747 | 1.395208  | -2.930363 |
| O | 0.704271  | -1.896827 | 0.167996  |
| C | 2.950633  | -2.631032 | -0.301652 |
| F | 3.103104  | -2.710012 | 1.027177  |
| F | 3.907266  | -1.805531 | -0.762563 |
| F | 3.199759  | -3.846085 | -0.806491 |
| C | 1.549198  | -2.134148 | -0.739502 |
| H | 0.631490  | 2.990796  | -2.107599 |
| C | -0.698178 | 1.595189  | -0.133764 |
| C | -1.485699 | 0.602590  | 0.692849  |
| C | -2.916119 | 0.748464  | 0.914061  |
| C | -3.587522 | -0.279629 | 1.603338  |
| C | -3.622539 | 1.892446  | 0.502365  |
| C | -4.942920 | -0.165489 | 1.868151  |
| H | -3.039247 | -1.163771 | 1.910977  |
| C | -4.975989 | 2.003871  | 0.786515  |
| H | -3.128938 | 2.704940  | -0.017930 |
| C | -5.635763 | 0.976072  | 1.461245  |
| H | -5.461114 | -0.963020 | 2.389088  |
| H | -5.519147 | 2.890887  | 0.479754  |
| H | -6.696903 | 1.065736  | 1.672253  |
| O | -0.890971 | -0.347434 | 1.247418  |

|    |           |           |           |
|----|-----------|-----------|-----------|
| Si | 0.682491  | -0.797575 | 2.087572  |
| C  | 2.239252  | 0.092522  | 1.547110  |
| H  | 2.968828  | -0.029697 | 2.358138  |
| H  | 2.708075  | -0.227053 | 0.618993  |
| H  | 2.036461  | 1.169462  | 1.486005  |
| C  | 0.151744  | 0.301783  | 3.551515  |
| H  | -0.778096 | -0.054322 | 4.009612  |
| H  | 0.930038  | 0.279200  | 4.324364  |
| H  | 0.004030  | 1.349580  | 3.263156  |
| C  | 0.550101  | -2.510640 | 2.814483  |
| H  | 0.762207  | -2.480883 | 3.887506  |
| H  | -0.486483 | -2.847515 | 2.694162  |
| H  | 1.198430  | -3.236168 | 2.326529  |
| H  | -1.325272 | 2.264918  | -0.722126 |
| H  | -0.068200 | 2.188326  | 0.545810  |

### IM5-2a<sup>+</sup>

M062X/BSI SCF energy: -1930.849925 a.u.

M062X/BSII SCF energy in solution: -1931.234727 a.u.

M062X/BSII free energy in solution: -1930.817604 a.u.

|   |           |           |           |
|---|-----------|-----------|-----------|
| S | -0.655148 | 1.079427  | -1.302997 |
| C | -0.788396 | 0.130347  | 0.256087  |
| C | -2.323599 | 0.745828  | -1.983150 |
| C | -1.141140 | -1.334448 | 0.105783  |
| C | -1.810192 | -1.955176 | 1.166559  |
| C | -2.122578 | -3.309762 | 1.104546  |
| C | -1.784290 | -4.052864 | -0.026470 |
| C | -1.136514 | -3.434895 | -1.093729 |
| C | -0.813035 | -2.081137 | -1.027532 |
| C | -3.435803 | 1.019538  | -1.007508 |
| C | -4.216278 | -0.034467 | -0.527739 |
| C | -5.247890 | 0.205213  | 0.380005  |
| C | -5.503612 | 1.501635  | 0.818126  |
| C | -4.724473 | 2.559128  | 0.346065  |
| C | -3.695928 | 2.319196  | -0.559539 |
| H | -1.555775 | 0.612388  | 0.875918  |
| H | -2.083824 | -1.371204 | 2.041380  |
| H | -2.636995 | -3.783453 | 1.934581  |
| H | -2.033905 | -5.108079 | -0.078125 |
| H | -0.876386 | -4.006243 | -1.979103 |
| H | -0.297945 | -1.605009 | -1.857463 |

|                                                       |           |           |           |   |           |           |           |
|-------------------------------------------------------|-----------|-----------|-----------|---|-----------|-----------|-----------|
| H                                                     | -2.381014 | 1.407973  | -2.851908 | C | 2.128561  | -0.472131 | -1.118694 |
| H                                                     | -2.362018 | -0.286828 | -2.337530 | C | -0.490665 | -1.103435 | -1.089555 |
| H                                                     | -4.014489 | -1.047004 | -0.869377 | C | 3.445691  | -0.615223 | -0.408811 |
| H                                                     | -5.849208 | -0.622781 | 0.742912  | C | 4.207333  | -1.771130 | -0.598365 |
| H                                                     | -6.305435 | 1.689791  | 1.525347  | C | 5.433439  | -1.919304 | 0.044877  |
| H                                                     | -4.921380 | 3.572403  | 0.682758  | C | 5.904507  | -0.911183 | 0.884066  |
| H                                                     | -3.087636 | 3.143381  | -0.924649 | C | 5.145039  | 0.241434  | 1.080104  |
| C                                                     | 0.500514  | 0.360270  | 1.066416  | C | 3.917394  | 0.391036  | 0.438954  |
| C                                                     | 1.805862  | 0.015554  | 0.322868  | C | -1.801710 | -1.631683 | -0.724829 |
| F                                                     | 0.571365  | 1.674416  | 1.398302  | C | -1.996224 | -2.496130 | 0.366292  |
| F                                                     | 0.442001  | -0.329856 | 2.227309  | C | -3.269188 | -2.947380 | 0.685890  |
| C                                                     | 2.272836  | -1.324149 | 0.106974  | C | -4.370216 | -2.548942 | -0.075809 |
| C                                                     | 3.330548  | -1.503409 | -0.816608 | C | -4.186413 | -1.702492 | -1.166874 |
| C                                                     | 1.728427  | -2.441564 | 0.780090  | C | -2.912051 | -1.247515 | -1.491854 |
| C                                                     | 3.814356  | -2.771159 | -1.071602 | H | 2.090529  | -1.094449 | -2.014284 |
| H                                                     | 3.741314  | -0.642419 | -1.333339 | H | 3.838985  | -2.551745 | -1.259389 |
| C                                                     | 2.234638  | -3.704922 | 0.522460  | H | 6.020743  | -2.818621 | -0.113003 |
| H                                                     | 0.932268  | -2.327696 | 1.503415  | H | 6.862202  | -1.023261 | 1.383127  |
| C                                                     | 3.266308  | -3.870718 | -0.401928 | H | 5.510401  | 1.027429  | 1.734001  |
| H                                                     | 4.613146  | -2.912767 | -1.790562 | H | 3.308026  | 1.275386  | 0.595426  |
| H                                                     | 1.820348  | -4.563141 | 1.039549  | H | -0.385602 | -0.594526 | -2.045918 |
| H                                                     | 3.650119  | -4.866169 | -0.603540 | H | -1.147354 | -2.822150 | 0.962006  |
| O                                                     | 2.446836  | 0.978003  | -0.177131 | H | -3.405279 | -3.616105 | 1.530074  |
| Si                                                    | 2.901075  | 2.711236  | 0.055843  | H | -5.364318 | -2.902445 | 0.179005  |
| C                                                     | 3.258927  | 2.861906  | 1.870172  | H | -5.037524 | -1.390969 | -1.764466 |
| H                                                     | 3.900414  | 3.735316  | 2.030326  | H | -2.768279 | -0.576296 | -2.334313 |
| H                                                     | 2.351174  | 2.985738  | 2.463571  | H | 1.899133  | 0.563479  | -1.373945 |
| H                                                     | 3.801140  | 1.982457  | 2.232140  | C | 0.547509  | 2.621840  | -0.537243 |
| C                                                     | 4.424903  | 2.731231  | -1.001047 | C | 0.046705  | 1.708848  | 0.322432  |
| H                                                     | 4.188280  | 2.472065  | -2.037646 | C | -1.420107 | 1.576980  | 0.567719  |
| H                                                     | 4.869473  | 3.731985  | -0.995790 | C | -1.808443 | 0.786897  | 1.656755  |
| H                                                     | 5.172508  | 2.025535  | -0.626243 | C | -2.420379 | 2.145193  | -0.237180 |
| C                                                     | 1.550701  | 3.789552  | -0.609349 | C | -3.154537 | 0.573076  | 1.942798  |
| H                                                     | 1.909113  | 4.825083  | -0.560982 | H | -1.033561 | 0.332623  | 2.266126  |
| H                                                     | 1.338172  | 3.561575  | -1.657499 | C | -3.764556 | 1.933997  | 0.055260  |
| H                                                     | 0.625135  | 3.719546  | -0.035138 | H | -2.159487 | 2.737372  | -1.105810 |
| <b>IM5-2a</b>                                         |           |           |           | C | -4.140769 | 1.148088  | 1.144687  |
| M062X/BSI SCF energy: -1521.714138 a.u.               |           |           |           | H | -3.431842 | -0.048247 | 2.789462  |
| M062X/BSII SCF energy in solution: -1522.055636 a.u.  |           |           |           | H | -4.523580 | 2.375202  | -0.584142 |
| M062X/BSII free energy in solution: -1521.750527 a.u. |           |           |           | H | -5.190972 | 0.977806  | 1.361187  |
|                                                       |           |           |           | O | 0.875258  | 0.896189  | 0.951252  |
|                                                       |           |           |           | F | -0.126174 | 3.568586  | -1.182368 |
|                                                       |           |           |           | F | 1.853142  | 2.772950  | -0.759535 |
| S                                                     | 0.757967  | -1.041180 | -0.048860 |   |           |           |           |

**IM5-2b**

M062X/BSI SCF energy: -1850.007659 a.u.

M062X/BSII SCF energy in solution: -1850.46091

a.u.

M062X/BSII free energy in solution: -1850.103227

a.u.

|   |           |           |           |
|---|-----------|-----------|-----------|
| S | -0.076549 | -0.032327 | -0.237850 |
| C | -0.668645 | -0.230063 | 1.485980  |
| C | -0.078509 | -1.731866 | -0.961790 |
| C | -0.842874 | 1.135787  | 2.091005  |
| C | -1.928756 | 1.928741  | 1.702023  |
| C | -2.101616 | 3.190912  | 2.260595  |
| C | -1.194360 | 3.668831  | 3.207473  |
| C | -0.111005 | 2.882737  | 3.592864  |
| C | 0.067549  | 1.618235  | 3.033082  |
| C | 0.012680  | -2.827369 | 0.051893  |
| C | 1.251943  | -3.344106 | 0.440756  |
| C | 1.319436  | -4.354313 | 1.398094  |
| C | 0.150063  | -4.855090 | 1.967147  |
| C | -1.089166 | -4.347199 | 1.577040  |
| C | -1.158867 | -3.335492 | 0.624253  |
| H | -1.618503 | -0.751633 | 1.376575  |
| H | -2.626955 | 1.541326  | 0.963181  |
| H | -2.947229 | 3.802058  | 1.960506  |
| H | -1.332880 | 4.652952  | 3.644412  |
| H | 0.595963  | 3.252085  | 4.329021  |
| H | 0.909404  | 0.998915  | 3.332483  |
| H | -1.010759 | -1.733694 | -1.529600 |
| H | 0.770537  | -1.715693 | -1.648719 |
| H | 2.160724  | -2.964042 | -0.019809 |
| H | 2.284165  | -4.753818 | 1.694586  |
| H | 0.204343  | -5.644508 | 2.710513  |
| H | -2.001316 | -4.741082 | 2.014238  |
| H | -2.116547 | -2.922295 | 0.315860  |
| H | 0.055736  | -0.845045 | 2.024977  |
| C | 1.679766  | 0.207283  | 0.136367  |
| C | 2.450188  | 0.475172  | -1.145613 |
| C | 3.905516  | 0.756771  | -1.032279 |
| C | 4.619398  | 1.016914  | -2.208398 |
| C | 4.564344  | 0.764515  | 0.201881  |
| C | 5.981171  | 1.282490  | -2.149415 |
| H | 4.092698  | 1.006472  | -3.157188 |
| C | 5.929387  | 1.029068  | 0.256028  |

|   |           |           |           |
|---|-----------|-----------|-----------|
| H | 4.023668  | 0.565115  | 1.121936  |
| C | 6.636124  | 1.287889  | -0.916975 |
| H | 6.533975  | 1.485511  | -3.060884 |
| H | 6.440817  | 1.034162  | 1.212905  |
| H | 7.700842  | 1.495224  | -0.871849 |
| O | 1.873447  | 0.452259  | -2.217328 |
| H | 2.068648  | -0.669642 | 0.665677  |
| H | 1.741848  | 1.069612  | 0.809826  |
| O | -2.874690 | -0.500795 | -0.396763 |
| O | -2.485884 | -0.378877 | -2.622871 |
| C | -4.351356 | 0.767451  | -1.693972 |
| F | -5.457311 | 0.129864  | -1.268893 |
| F | -4.592921 | 1.186729  | -2.941894 |
| F | -4.225407 | 1.870264  | -0.927028 |
| C | -3.096847 | -0.138489 | -1.575876 |

**IM6-2a**

M062X/BSI SCF energy: -2457.028177 a.u.

M062X/BSII SCF energy in solution: -2457.603372

a.u.

M062X/BSII free energy in solution: -2457.161629

a.u.

|   |           |           |           |
|---|-----------|-----------|-----------|
| S | -1.012625 | -1.848822 | -1.266015 |
| C | -0.725404 | -0.909922 | 0.285440  |
| C | -1.708134 | -0.520113 | -2.308329 |
| C | -1.969739 | -0.766140 | 1.135830  |
| C | -2.503036 | 0.510457  | 1.323543  |
| C | -3.682682 | 0.678546  | 2.047159  |
| C | -4.325246 | -0.426408 | 2.601173  |
| C | -3.788352 | -1.701976 | 2.424094  |
| C | -2.619644 | -1.873709 | 1.688630  |
| C | -3.066467 | -0.002566 | -1.895248 |
| C | -4.112077 | -0.862877 | -1.546833 |
| C | -5.349445 | -0.352623 | -1.165600 |
| C | -5.561632 | 1.026887  | -1.136996 |
| C | -4.527881 | 1.888816  | -1.493341 |
| C | -3.285338 | 1.376468  | -1.866460 |
| H | -0.365310 | 0.081411  | -0.013378 |
| H | -2.004921 | 1.360988  | 0.863288  |
| H | -4.102331 | 1.672544  | 2.170645  |
| H | -5.245254 | -0.296572 | 3.162929  |
| H | -4.286371 | -2.566243 | 2.852768  |
| H | -2.219530 | -2.871721 | 1.535128  |

|    |           |           |           |
|----|-----------|-----------|-----------|
| H  | -0.986175 | 0.299335  | -2.335334 |
| H  | -1.752305 | -0.977185 | -3.302902 |
| H  | -3.946027 | -1.937145 | -1.551196 |
| H  | -6.149823 | -1.031342 | -0.885731 |
| H  | -6.525731 | 1.423356  | -0.833002 |
| H  | -4.682543 | 2.963538  | -1.468640 |
| H  | -2.461677 | 2.044926  | -2.099106 |
| C  | 0.402353  | -1.593510 | 1.064196  |
| C  | 1.828977  | -1.322657 | 0.533299  |
| F  | 0.398466  | -1.149549 | 2.348746  |
| F  | 0.205825  | -2.938038 | 1.137804  |
| C  | 2.465671  | -2.038611 | -0.548357 |
| C  | 3.585185  | -1.419615 | -1.143979 |
| C  | 2.028582  | -3.296595 | -1.008722 |
| C  | 4.247721  | -2.047180 | -2.184166 |
| H  | 3.890173  | -0.436468 | -0.803502 |
| C  | 2.714109  | -3.921442 | -2.039046 |
| H  | 1.183965  | -3.794388 | -0.554917 |
| C  | 3.815124  | -3.299483 | -2.627816 |
| H  | 5.096729  | -1.564781 | -2.655524 |
| H  | 2.387718  | -4.895511 | -2.385703 |
| H  | 4.338536  | -3.792339 | -3.441188 |
| O  | 2.484906  | -0.433083 | 1.120565  |
| Si | 2.415672  | 0.972492  | 2.233345  |
| C  | 2.900771  | 0.201459  | 3.850498  |
| H  | 3.027591  | 0.985766  | 4.604550  |
| H  | 2.135308  | -0.492867 | 4.207122  |
| H  | 3.849154  | -0.336545 | 3.761623  |
| C  | 3.761199  | 1.991078  | 1.463371  |
| H  | 3.584876  | 2.096942  | 0.390287  |
| H  | 3.803543  | 2.989051  | 1.910270  |
| H  | 4.731908  | 1.507077  | 1.610131  |
| C  | 0.746312  | 1.783056  | 2.288513  |
| H  | 0.891844  | 2.756362  | 2.774045  |
| H  | 0.297616  | 1.971151  | 1.310329  |
| H  | 0.044727  | 1.206840  | 2.896107  |
| O  | -0.372154 | 2.149820  | -0.942698 |
| O  | 1.561975  | 0.977138  | -1.003957 |
| C  | 1.628162  | 3.344476  | -1.185331 |
| F  | 1.696462  | 3.945486  | 0.022678  |
| F  | 1.020890  | 4.204608  | -2.014267 |
| F  | 2.889117  | 3.198758  | -1.619870 |
| C  | 0.859616  | 2.003806  | -1.054988 |

### IM7-2a

M062X/BSI SCF energy: -1521.700206 a.u.

M062X/BSII SCF energy in solution: -1522.047032 a.u.

M062X/BSII free energy in solution: -1521.743856 a.u.

|   |           |           |           |
|---|-----------|-----------|-----------|
| S | 1.397734  | 0.893402  | 0.233078  |
| C | -0.078849 | 0.984604  | -0.832510 |
| C | 2.614224  | 0.427054  | -1.055030 |
| C | -1.215702 | 1.659614  | -0.103033 |
| C | -1.976772 | 2.608633  | -0.787498 |
| C | -3.073360 | 3.209434  | -0.173733 |
| C | -3.417875 | 2.859817  | 1.130295  |
| C | -2.657679 | 1.916589  | 1.821167  |
| C | -1.557730 | 1.321708  | 1.209657  |
| C | 3.965534  | 0.249964  | -0.418376 |
| C | 4.860223  | 1.321432  | -0.356002 |
| C | 6.104768  | 1.169276  | 0.251322  |
| C | 6.464124  | -0.057097 | 0.807364  |
| C | 5.573813  | -1.128926 | 0.755274  |
| C | 4.330147  | -0.975241 | 0.147376  |
| H | 0.189368  | 1.574102  | -1.712515 |
| H | -1.711600 | 2.870202  | -1.808641 |
| H | -3.657830 | 3.947478  | -0.714204 |
| H | -4.275071 | 3.322838  | 1.609197  |
| H | -2.923248 | 1.641544  | 2.837208  |
| H | -0.978753 | 0.575072  | 1.748212  |
| H | 2.268583  | -0.496408 | -1.522717 |
| H | 2.640215  | 1.223007  | -1.804328 |
| H | 4.577013  | 2.276684  | -0.791394 |
| H | 6.794076  | 2.007385  | 0.287845  |
| H | 7.434607  | -0.178204 | 1.278723  |
| H | 5.849454  | -2.086485 | 1.186714  |
| H | 3.632880  | -1.808189 | 0.108277  |
| C | -0.122424 | -2.205835 | -0.148735 |
| C | -0.951244 | -1.248444 | -0.566728 |
| C | -2.410101 | -1.255957 | -0.321143 |
| C | -3.246138 | -0.618719 | -1.245748 |
| C | -2.976175 | -1.852527 | 0.812693  |
| C | -4.621648 | -0.581301 | -1.041714 |
| H | -2.807648 | -0.143500 | -2.117413 |
| C | -4.353532 | -1.817634 | 1.008203  |
| H | -2.341650 | -2.322827 | 1.555893  |

|   |           |           |           |
|---|-----------|-----------|-----------|
| C | -5.181318 | -1.181344 | 0.085191  |
| H | -5.257818 | -0.080326 | -1.765052 |
| H | -4.779072 | -2.276938 | 1.895096  |
| H | -6.254286 | -1.148603 | 0.245929  |
| O | -0.420436 | -0.291524 | -1.401735 |
| F | -0.480563 | -3.265472 | 0.551918  |
| F | 1.165766  | -2.255603 | -0.429912 |

### TS5-2a

M062X/BSI SCF energy: -2457.021579 a.u.

M062X/BSII SCF energy in solution: -2457.595846

a.u.

M062X/BSII free energy in solution: -2457.153148

a.u.

|   |           |           |           |
|---|-----------|-----------|-----------|
| S | -0.398661 | -1.138942 | -1.801956 |
| C | -0.599117 | -1.127941 | 0.020472  |
| C | -1.205503 | 0.449983  | -2.224646 |
| C | -1.887413 | -1.754734 | 0.514643  |
| C | -2.700032 | -1.034787 | 1.391978  |
| C | -3.904915 | -1.571529 | 1.841075  |
| C | -4.301640 | -2.839524 | 1.423733  |
| C | -3.489931 | -3.566352 | 0.552889  |
| C | -2.290700 | -3.027177 | 0.096534  |
| C | -2.595184 | 0.612875  | -1.667340 |
| C | -3.617806 | -0.284110 | -1.997198 |
| C | -4.889959 | -0.133117 | -1.456704 |
| C | -5.159252 | 0.922290  | -0.581278 |
| C | -4.150059 | 1.822690  | -0.255915 |
| C | -2.871833 | 1.667070  | -0.795477 |
| H | -0.536550 | -0.080957 | 0.343336  |
| H | -2.401035 | -0.037775 | 1.701012  |
| H | -4.535313 | -0.991924 | 2.508589  |
| H | -5.241682 | -3.257908 | 1.769951  |
| H | -3.795896 | -4.553541 | 0.220749  |
| H | -1.677005 | -3.590246 | -0.600103 |
| H | -0.551936 | 1.254917  | -1.887413 |
| H | -1.210419 | 0.447796  | -3.319226 |
| H | -3.406139 | -1.113044 | -2.668504 |
| H | -5.673964 | -0.838990 | -1.714255 |
| H | -6.151698 | 1.037290  | -0.156275 |
| H | -4.350929 | 2.646828  | 0.422008  |
| H | -2.091144 | 2.378925  | -0.540129 |
| C | 0.612022  | -1.837395 | 0.621999  |

|    |           |           |           |
|----|-----------|-----------|-----------|
| C  | 1.967464  | -1.147871 | 0.351652  |
| F  | 0.486559  | -1.867678 | 1.976371  |
| F  | 0.667017  | -3.129565 | 0.218934  |
| C  | 2.995621  | -1.640391 | -0.553342 |
| C  | 4.267896  | -1.041997 | -0.447803 |
| C  | 2.774512  | -2.643628 | -1.517174 |
| C  | 5.297304  | -1.442705 | -1.281605 |
| H  | 4.437242  | -0.273967 | 0.298741  |
| C  | 3.811400  | -3.026606 | -2.355404 |
| H  | 1.805947  | -3.110489 | -1.632271 |
| C  | 5.068404  | -2.433635 | -2.238144 |
| H  | 6.276363  | -0.985677 | -1.189706 |
| H  | 3.638867  | -3.791203 | -3.104537 |
| H  | 5.874418  | -2.744891 | -2.895343 |
| O  | 2.200167  | -0.124287 | 1.017684  |
| Si | 1.642271  | 1.002562  | 2.361063  |
| C  | 2.572633  | -0.027515 | 3.646357  |
| H  | 2.497834  | 0.468696  | 4.621375  |
| H  | 2.160093  | -1.035711 | 3.754207  |
| H  | 3.637228  | -0.120489 | 3.405559  |
| C  | 2.613213  | 2.591254  | 2.218860  |
| H  | 1.959870  | 3.452539  | 2.061980  |
| H  | 3.196829  | 2.749692  | 3.131003  |
| H  | 3.309901  | 2.533056  | 1.376483  |
| C  | -0.123456 | 1.007547  | 2.955387  |
| H  | -0.094625 | 1.393957  | 3.982889  |
| H  | -0.769453 | 1.646749  | 2.354103  |
| H  | -0.524447 | -0.007303 | 3.010910  |
| O  | -0.375983 | 3.544743  | 0.969852  |
| O  | 0.812650  | 1.731882  | 0.304982  |
| C  | 0.666310  | 3.618170  | -1.128141 |
| F  | 1.524021  | 4.622163  | -0.875180 |
| F  | -0.422449 | 4.159287  | -1.696681 |
| F  | 1.242587  | 2.828090  | -2.043223 |
| C  | 0.311711  | 2.886053  | 0.191116  |

### TS5A-2a

M062X/BSI SCF energy: -2048.332541 a.u.

M062X/BSII SCF energy in solution: -2048.850666

a.u.

M062X/BSII free energy in solution: -2048.51332

a.u.

|   |          |           |           |
|---|----------|-----------|-----------|
| S | 0.389337 | -0.610278 | -0.026104 |
|---|----------|-----------|-----------|

|   |           |           |           |
|---|-----------|-----------|-----------|
| O | 3.069804  | 0.562745  | -0.314088 |
| C | 1.435882  | -1.758356 | 0.927099  |
| C | 0.063302  | 0.615630  | 1.125242  |
| C | 1.774049  | -2.964529 | 0.101431  |
| C | 2.855874  | -2.918095 | -0.782216 |
| C | 3.172877  | -4.032038 | -1.554310 |
| C | 2.408435  | -5.193501 | -1.449265 |
| C | 1.324262  | -5.239260 | -0.574154 |
| C | 1.003877  | -4.125253 | 0.198080  |
| C | -0.802829 | 1.717773  | 0.600454  |
| C | -0.385001 | 2.496297  | -0.486173 |
| C | -1.210870 | 3.493553  | -0.998562 |
| C | -2.454203 | 3.740577  | -0.418544 |
| C | -2.865387 | 2.986362  | 0.680094  |
| C | -2.045910 | 1.981146  | 1.184703  |
| H | 2.318151  | -1.161918 | 1.168424  |
| H | 3.443679  | -2.006272 | -0.855633 |
| H | 4.017455  | -3.995266 | -2.235119 |
| H | 2.658500  | -6.063306 | -2.048767 |
| H | 0.728182  | -6.142816 | -0.493323 |
| H | 0.157872  | -4.149101 | 0.879530  |
| H | -0.237842 | 0.203368  | 2.091978  |
| H | 1.336037  | 1.193841  | 1.301088  |
| H | 0.588018  | 2.316423  | -0.940361 |
| H | -0.880543 | 4.082245  | -1.848899 |
| H | -3.099656 | 4.515787  | -0.819598 |
| H | -3.833907 | 3.169397  | 1.136058  |
| H | -2.382488 | 1.367109  | 2.017000  |
| O | 2.335271  | 1.877365  | 1.363824  |
| C | 4.079832  | 2.695432  | 0.009820  |
| F | 3.440176  | 3.623663  | -0.719849 |
| F | 5.097661  | 2.235555  | -0.717005 |
| F | 4.578325  | 3.301760  | 1.090229  |
| C | 3.090984  | 1.572443  | 0.376711  |
| H | 0.880375  | -2.003006 | 1.833879  |
| C | -2.307751 | -1.628099 | 1.660205  |
| C | -2.158249 | -1.313967 | 0.370045  |
| C | -3.123052 | -0.574538 | -0.465272 |
| C | -2.663988 | -0.004878 | -1.659580 |
| C | -4.458152 | -0.374969 | -0.085889 |
| C | -3.507929 | 0.783485  | -2.436073 |
| H | -1.643232 | -0.176067 | -1.986998 |
| C | -5.298236 | 0.406370  | -0.872760 |
| H | -4.849180 | -0.824136 | 0.818732  |

|   |           |           |           |
|---|-----------|-----------|-----------|
| C | -4.826473 | 0.998555  | -2.042891 |
| H | -3.129398 | 1.228154  | -3.351256 |
| H | -6.329103 | 0.552921  | -0.565704 |
| H | -5.483443 | 1.615177  | -2.647954 |
| O | -0.960878 | -1.685889 | -0.202123 |
| F | -3.362446 | -1.370943 | 2.398979  |
| F | -1.381552 | -2.251449 | 2.362595  |

### TS5-2b

M062X/BSI SCF energy: -1849.967977 a.u.

M062X/BSII SCF energy in solution: -1850.423094 a.u.

M062X/BSII free energy in solution: -1850.067443 a.u.

|   |           |           |           |
|---|-----------|-----------|-----------|
| S | 0.469472  | -1.217391 | 1.443495  |
| C | 0.220590  | -2.520083 | 0.184759  |
| C | -1.589755 | 0.097756  | 1.082047  |
| C | 1.478490  | -3.287183 | -0.120313 |
| C | 1.931268  | -4.290615 | 0.741440  |
| C | 3.102982  | -4.985830 | 0.456962  |
| C | 3.836595  | -4.681781 | -0.690086 |
| C | 3.392287  | -3.681693 | -1.551871 |
| C | 2.217539  | -2.987645 | -1.267851 |
| C | -1.229944 | 0.728603  | -0.177701 |
| C | -0.628723 | 1.996143  | -0.183517 |
| C | -0.250475 | 2.581316  | -1.385353 |
| C | -0.479520 | 1.912110  | -2.589417 |
| C | -1.108872 | 0.667736  | -2.594148 |
| C | -1.493531 | 0.079781  | -1.393306 |
| H | -0.555536 | -3.166994 | 0.603436  |
| H | 1.359403  | -4.527188 | 1.635351  |
| H | 3.443575  | -5.767371 | 1.129108  |
| H | 4.749980  | -5.225109 | -0.911438 |
| H | 3.957153  | -3.442538 | -2.447593 |
| H | 1.863973  | -2.211451 | -1.942874 |
| H | -2.113614 | -0.848436 | 1.096673  |
| H | -1.377270 | 0.589607  | 2.020742  |
| H | -0.461102 | 2.512691  | 0.757574  |
| H | 0.224242  | 3.557651  | -1.385861 |
| H | -0.176104 | 2.368098  | -3.526760 |
| H | -1.305676 | 0.159664  | -3.532569 |
| H | -2.008976 | -0.877099 | -1.388176 |
| H | -0.168894 | -2.039583 | -0.717856 |

|   |           |           |           |
|---|-----------|-----------|-----------|
| C | 1.685257  | -0.215644 | 0.558995  |
| C | 1.899772  | 1.087038  | 1.303375  |
| C | 2.793677  | 2.103993  | 0.680839  |
| C | 2.986590  | 3.314803  | 1.355235  |
| C | 3.418552  | 1.884891  | -0.551997 |
| C | 3.799092  | 4.297387  | 0.803434  |
| H | 2.492891  | 3.469871  | 2.309186  |
| C | 4.231495  | 2.871594  | -1.101646 |
| H | 3.277032  | 0.950596  | -1.087073 |
| C | 4.421986  | 4.075484  | -0.425651 |
| H | 3.948313  | 5.236086  | 1.327222  |
| H | 4.715823  | 2.701296  | -2.057627 |
| H | 5.057575  | 4.842826  | -0.856879 |
| O | 1.349357  | 1.283945  | 2.371854  |
| H | 1.327303  | -0.024819 | -0.459939 |
| H | 2.631234  | -0.763795 | 0.489195  |
| O | -4.259494 | 1.819424  | -0.634170 |
| O | -3.470924 | 0.984974  | 1.316855  |
| C | -4.958893 | -0.336934 | 0.069827  |
| F | -5.691782 | -0.366266 | -1.047107 |
| F | -5.790462 | -0.548019 | 1.102671  |
| F | -4.125629 | -1.402058 | 0.022969  |
| C | -4.155384 | 0.976207  | 0.247132  |

**TS6A-2a**

M062X/BSI SCF energy: -1521.700206 a.u.

M062X/BSII SCF energy in solution: -1522.047032

a.u.

M062X/BSII free energy in solution: -1521.743856

a.u.

|   |           |           |           |
|---|-----------|-----------|-----------|
| S | -0.158231 | -1.905304 | -0.297748 |
| C | -1.621207 | -2.167438 | 0.778053  |
| C | 1.090602  | -2.108320 | 0.747877  |
| C | -2.855665 | -1.790769 | 0.008381  |
| C | -3.516438 | -2.738167 | -0.777206 |
| C | -4.650692 | -2.378855 | -1.501545 |
| C | -5.127437 | -1.070123 | -1.445206 |

|   |           |           |           |
|---|-----------|-----------|-----------|
| C | -4.467744 | -0.121783 | -0.664109 |
| C | -3.330455 | -0.477000 | 0.056705  |
| C | 2.480717  | -1.988511 | 0.404345  |
| C | 2.919194  | -1.606695 | -0.881092 |
| C | 4.273891  | -1.489926 | -1.140936 |
| C | 5.206353  | -1.746245 | -0.129579 |
| C | 4.783888  | -2.120385 | 1.145499  |
| C | 3.427817  | -2.239430 | 1.415647  |
| H | -1.620768 | -3.220463 | 1.067282  |
| H | -3.143259 | -3.758711 | -0.814730 |
| H | -5.162959 | -3.120571 | -2.106417 |
| H | -6.012674 | -0.790807 | -2.008211 |
| H | -4.838781 | 0.897534  | -0.617211 |
| H | -2.800627 | 0.247224  | 0.668605  |
| H | 0.841471  | -2.343839 | 1.781879  |
| H | 2.199720  | -1.393360 | -1.667353 |
| H | 4.610623  | -1.193737 | -2.128665 |
| H | 6.266882  | -1.649951 | -0.340204 |
| H | 5.511312  | -2.313662 | 1.926436  |
| H | 3.084611  | -2.527408 | 2.404976  |
| H | -1.452804 | -1.508110 | 1.630011  |
| C | -1.428552 | 2.414887  | 1.474159  |
| C | -0.468667 | 1.680297  | 0.862484  |
| C | 0.516881  | 2.355443  | -0.046327 |
| C | 1.696703  | 1.649206  | -0.311702 |
| C | 0.331022  | 3.597073  | -0.672173 |
| C | 2.672376  | 2.166154  | -1.158571 |
| H | 1.824374  | 0.684582  | 0.168183  |
| C | 1.305582  | 4.112525  | -1.523475 |
| H | -0.580975 | 4.160088  | -0.511548 |
| C | 2.481135  | 3.404404  | -1.770147 |
| H | 3.581268  | 1.599717  | -1.344891 |
| H | 1.140276  | 5.072151  | -2.004959 |
| H | 3.235245  | 3.811040  | -2.437102 |
| O | -0.365990 | 0.400000  | 1.045059  |
| F | -1.610542 | 3.745165  | 1.418183  |
| F | -2.338251 | 1.878735  | 2.305253  |

## 7 KIE studies and control experiments

### 7.1 KIE studies

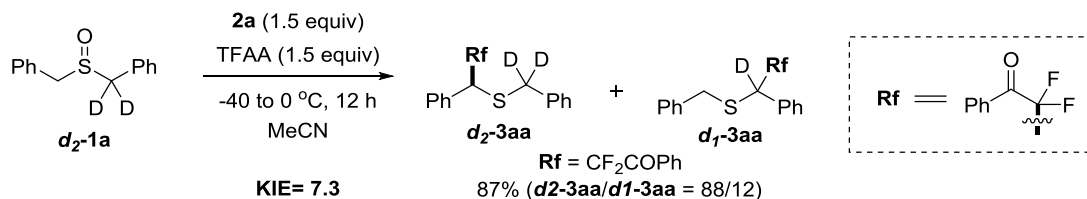

To a solution of dibenzyl sulfoxide-*d*<sub>2</sub> **d<sub>2</sub>-1a** (116 mg, 0.5 mmol) and difluoroenol silyl ether **2a** (171 mg, 0.75 mmol) in MeCN (2.5 mL) was added trifluoroacetic anhydride (105 μL, 0.75 mmol) at -40 °C. After stirring for 5 min, the reaction mixture was gradually warmed to 0 °C and kept stirring for 12 h. After that, the mixture was passed through a short silica gel column and concentrated under vacuum. The obtained residue was further purified by flash chromatography on silica gel affording a mixture of **d<sub>2</sub>-3aa** and **d<sub>1</sub>-3aa** in 87% yield. The ratio of **d<sub>2</sub>-3aa** and **d<sub>1</sub>-3aa** (82/12) was determined by <sup>1</sup>H NMR as shown below.

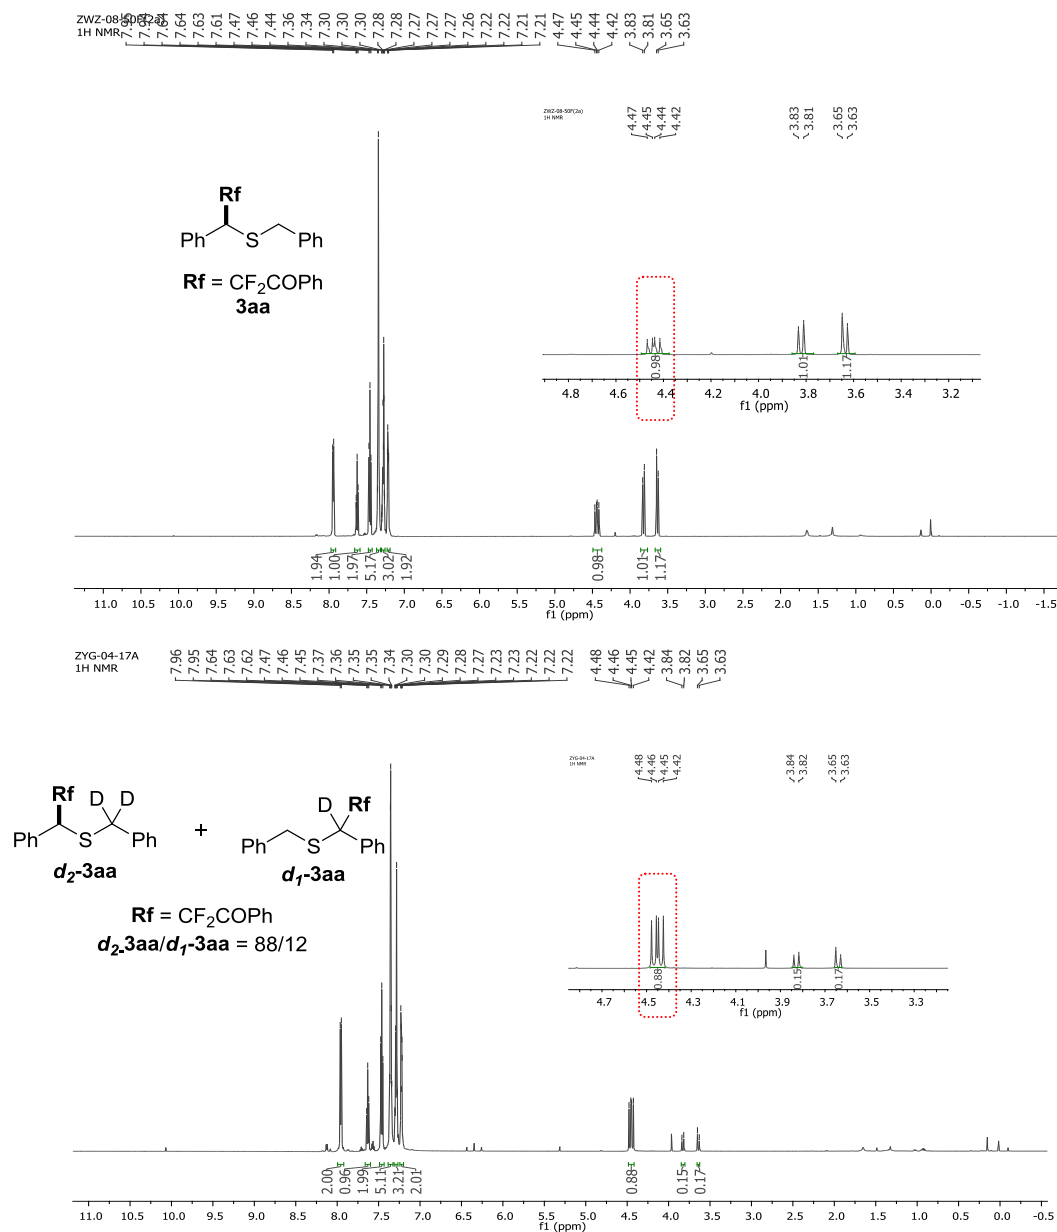



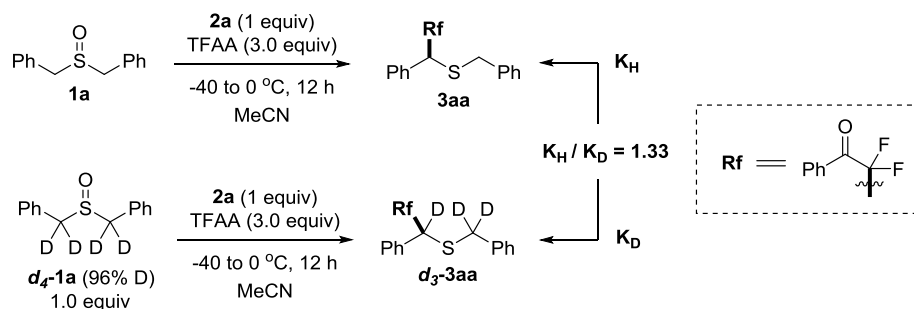

To a mixture of dibenzyl sulfoxide **1a** (115 mg, 0.5 mmol) or dibenzyl sulfoxide- $d_4$  **d<sub>4</sub>-1a** (117 mg, 0.5 mmol) in MeCN (2.5 mL) was added internal standard trifluorotoluene (73 mg, 0.5 mmol) and trifluoroacetic anhydride (210  $\mu\text{L}$ , 1.5 mmol) at  $-40^\circ\text{C}$ . After that, 0.1 mL of reaction mixtures were taken by syringes at the indicated time, and quickly quenched with  $\text{Et}_3\text{N}$  in  $\text{CDCl}_3$  (0.5 mL, 1 M). The obtained samples were then brought for  $^{19}\text{F}$ -NMR analysis. Above experiment was repeated for three times. The resulting data of three experiments was then taken an average for further analysis on Microsoft Excel. The  $k_H=8.0\times 10^{-4}\text{ min}^{-1}$  and  $k_D=6.0\times 10^{-4}\text{ min}^{-1}$  were determined by a linear regression model. As the result, the  $k_H/k_D$  could be calculated from the equation  $8.0\times 10^{-4}/6.0\times 10^{-4} = 1.33$ .

#### Reaction with **1a**

| Time (min) | NMR yield (%)         |                       | NMR yield (%)         |                 | [Product] (M) |
|------------|-----------------------|-----------------------|-----------------------|-----------------|---------------|
|            | 1 <sup>st</sup> trial | 2 <sup>nd</sup> trial | 3 <sup>rd</sup> trial | AVG of 3 trials |               |
| 15         | 22                    | 25                    | 20                    | 22              | 0.044         |
| 30         | 26                    | 25                    | 25                    | 25              | 0.05          |
| 45         | 34                    | 31                    | 37                    | 34              | 0.068         |
| 60         | 41                    | 44                    | 46                    | 44              | 0.088         |
| 90         | 51                    | 52                    | 55                    | 53              | 0.106         |
| 120        | 64                    | 67                    | 62                    | 64              | 0.128         |

#### Reaction with **d<sub>4</sub>-1a**

| Time (min) | NMR yield (%)         |                       | NMR yield (%)         |                 | [Product] (M) |
|------------|-----------------------|-----------------------|-----------------------|-----------------|---------------|
|            | 1 <sup>st</sup> trial | 2 <sup>nd</sup> trial | 3 <sup>rd</sup> trial | AVG of 3 trials |               |
| 15         | 14                    | 11                    | 13                    | 13              | 0.026         |
| 30         | 18                    | 14                    | 13                    | 15              | 0.03          |
| 45         | 22                    | 20                    | 22                    | 21              | 0.042         |
| 60         | 24                    | 27                    | 29                    | 27              | 0.054         |
| 90         | 36                    | 33                    | 40                    | 36              | 0.072         |
| 120        | 45                    | 42                    | 45                    | 44              | 0.088         |

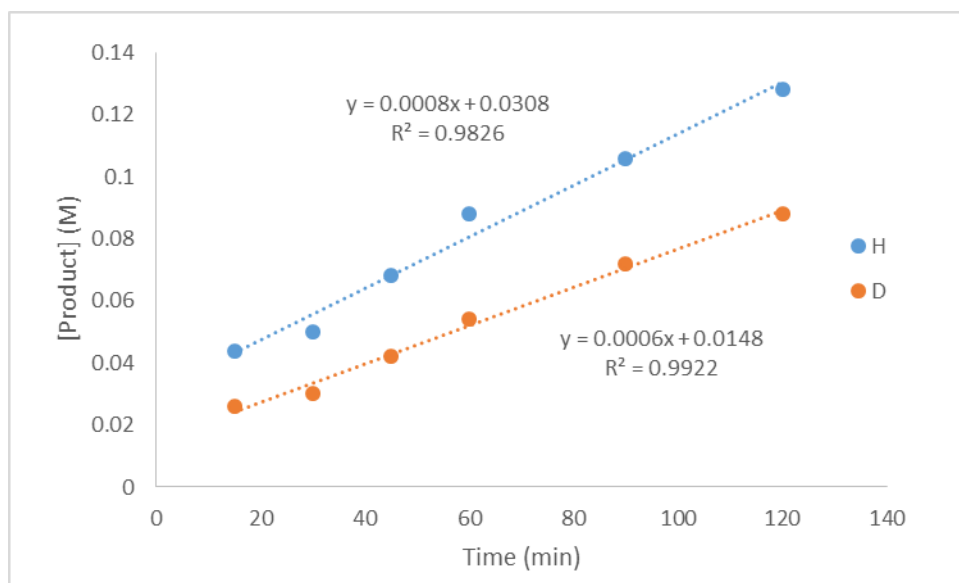

## 7.2 Control experiments

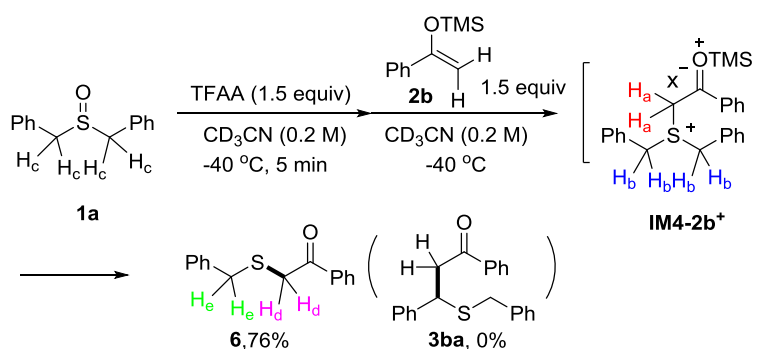

To a solution of dibenzyl sulfoxide **1a** (0.1 mmol in 0.5 mL of CD<sub>3</sub>CN) in NMR tube was added trifluoroacetic anhydride TFAA (21 μL, 0.15 mmol) at -40 °C. After shaking for 5 min, enol silyl ether **2b** (28 mg, 0.15 mmol) was added, and the resulting tube was quickly inserted into NMR for intermediate determination. After that, the mixture was warmed to 0 °C and then kept at the same temperature for 12 h. During the whole reaction process, no expected product **3ba** was determined. Instead, sulfide **6** was obtained in 76% yield. <sup>1</sup>H NMR (600 MHz, CDCl<sub>3</sub>): δ 7.95 (d, *J* = 8.1 Hz, 2H), 7.65 – 7.60 (m, 1H), 7.48 – 7.44 (m, 2H), 7.49 – 5.32 (m, 4H), 7.30 – 7.27 (m, 1H), 3.79 (s, 2 H), 3.60 (s, 2 H).

The NMR spectra of title compound is consistent with the data reported in literature (Dias, R. M. P.; Burtoloso, A. C. B. *Org. Lett.* **2016**, *18*, 3034).

HK-20190306-H  
1H NMR

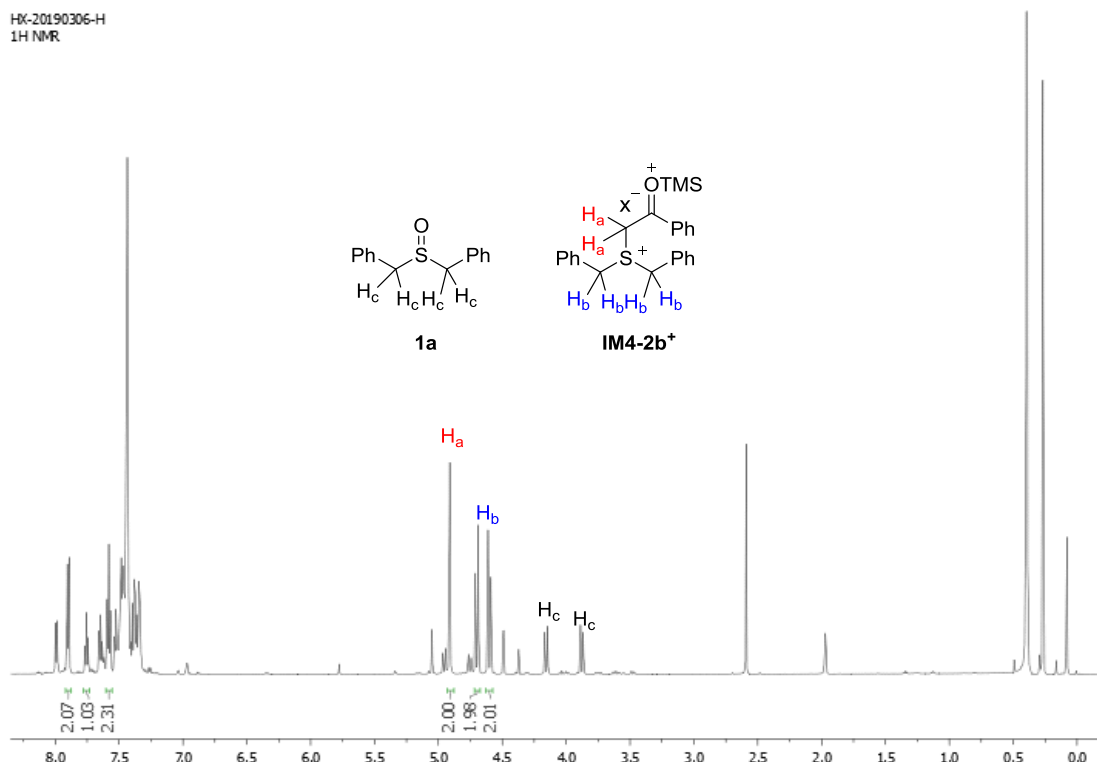

脱甲基谱图  
1H NMR

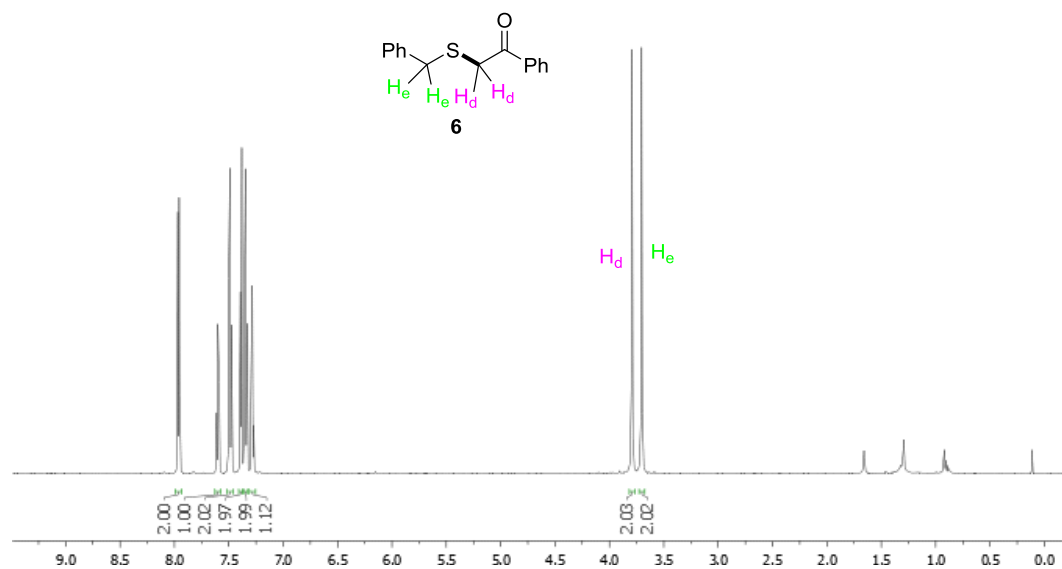

# 8 NMR spectra

ZWZ-08-46B(1c)  
1H NMR

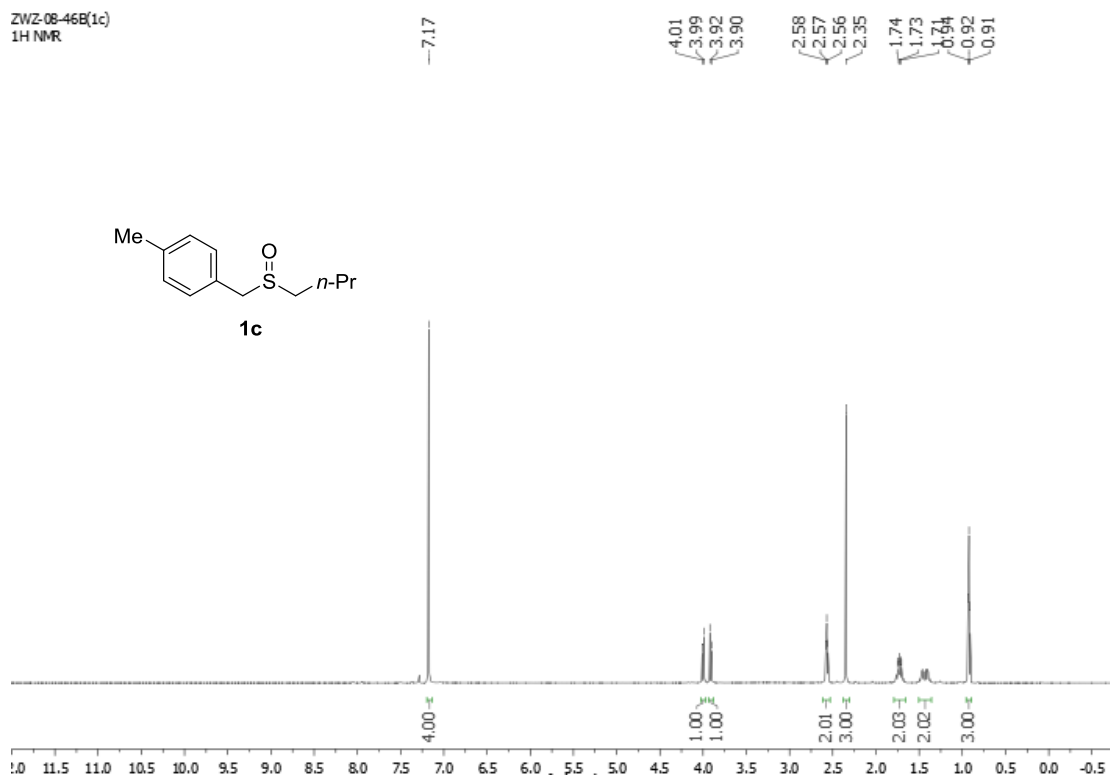

ZWZ-08-46B(1c)  
13C NMR

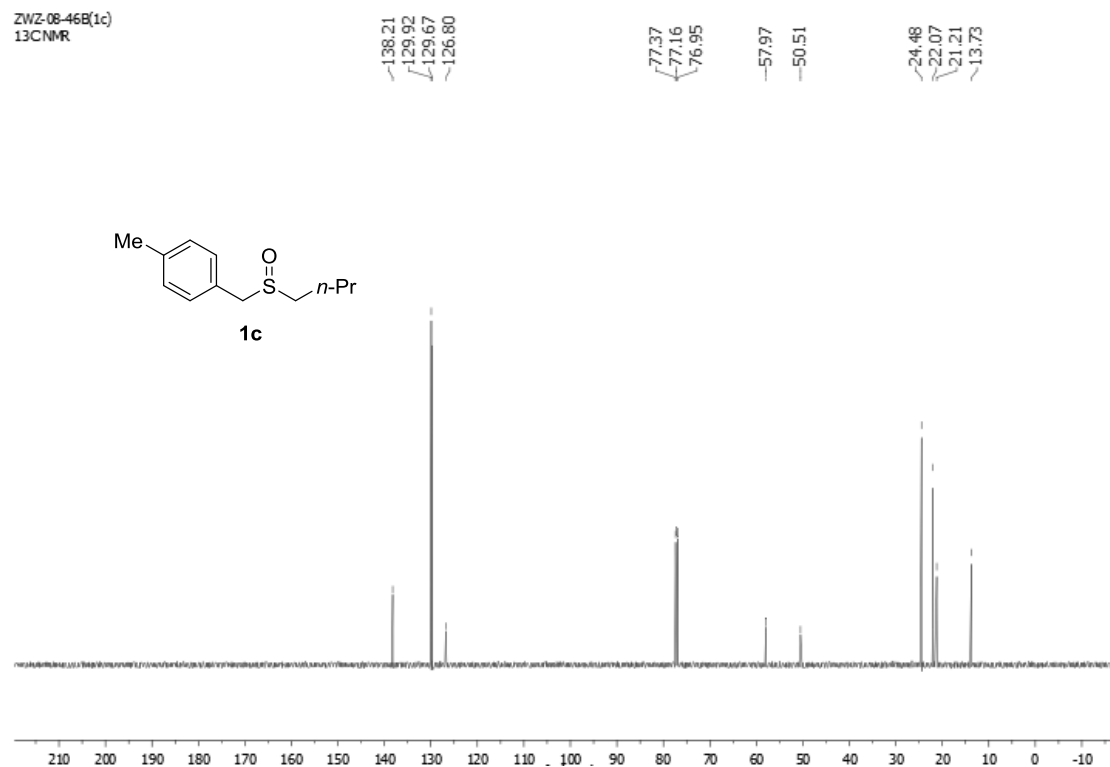

ZYL-01-27B(1e)  
1H NMR

7.27  
7.26  
7.25  
7.23  
7.14  
7.13  
7.10  
7.08  
7.07

4.01  
3.99  
3.90  
3.88

2.59  
2.58  
2.56  
2.35

1.73  
1.71  
1.69  
1.67  
1.65  
1.63  
1.61  
1.59  
1.57  
1.55  
1.53  
1.51  
1.49  
1.47  
1.45  
1.43  
1.41  
1.39  
1.37  
1.35  
1.33  
1.31  
1.29  
1.27  
1.25  
1.23  
1.21  
1.19  
1.17  
1.15  
1.13  
1.11  
1.09  
1.07  
1.05  
1.03  
1.01  
0.99  
0.97  
0.95  
0.93  
0.91  
0.89  
0.87  
0.85  
0.83  
0.81  
0.79  
0.77  
0.75  
0.73  
0.71  
0.69  
0.67  
0.65  
0.63  
0.61  
0.59  
0.57  
0.55  
0.53  
0.51  
0.49  
0.47  
0.45  
0.43  
0.41  
0.39  
0.37  
0.35  
0.33  
0.31  
0.29  
0.27  
0.25  
0.23  
0.21  
0.19  
0.17  
0.15  
0.13  
0.11  
0.09  
0.07  
0.05  
0.03  
0.01  
-0.01  
-0.03  
-0.05  
-0.07  
-0.09  
-0.11  
-0.13  
-0.15  
-0.17  
-0.19  
-0.21  
-0.23  
-0.25  
-0.27  
-0.29  
-0.31  
-0.33  
-0.35  
-0.37  
-0.39  
-0.41  
-0.43  
-0.45  
-0.47  
-0.49  
-0.51  
-0.53  
-0.55  
-0.57  
-0.59  
-0.61  
-0.63  
-0.65  
-0.67  
-0.69  
-0.71  
-0.73  
-0.75  
-0.77  
-0.79  
-0.81  
-0.83  
-0.85  
-0.87  
-0.89  
-0.91  
-0.93  
-0.95  
-0.97  
-0.99

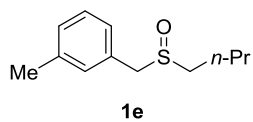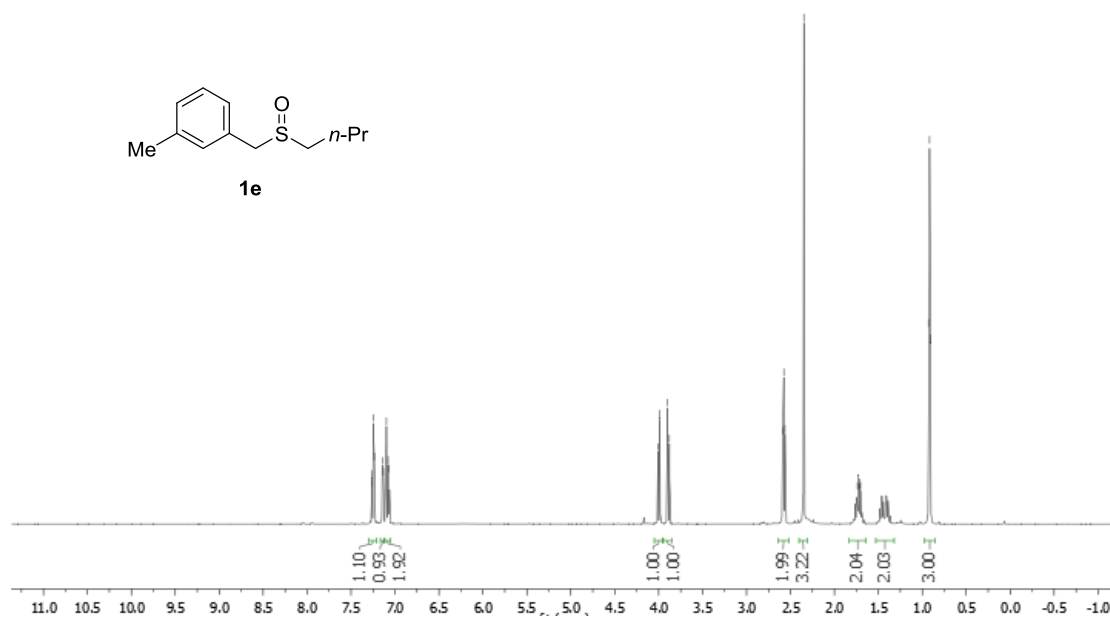

ZYL-01-27B(1e)  
13C NMR

138.80  
130.75  
129.93  
129.19  
128.92  
127.07

77.37  
77.16  
76.95

58.41  
50.71

24.52  
22.11  
21.44  
13.77

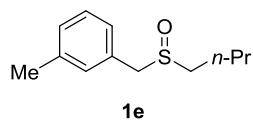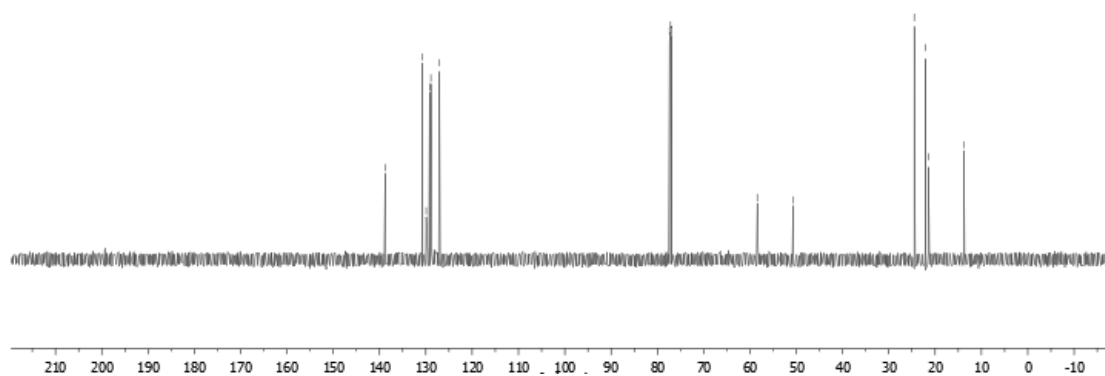

ZYL-01-23(1f)  
1H NMR

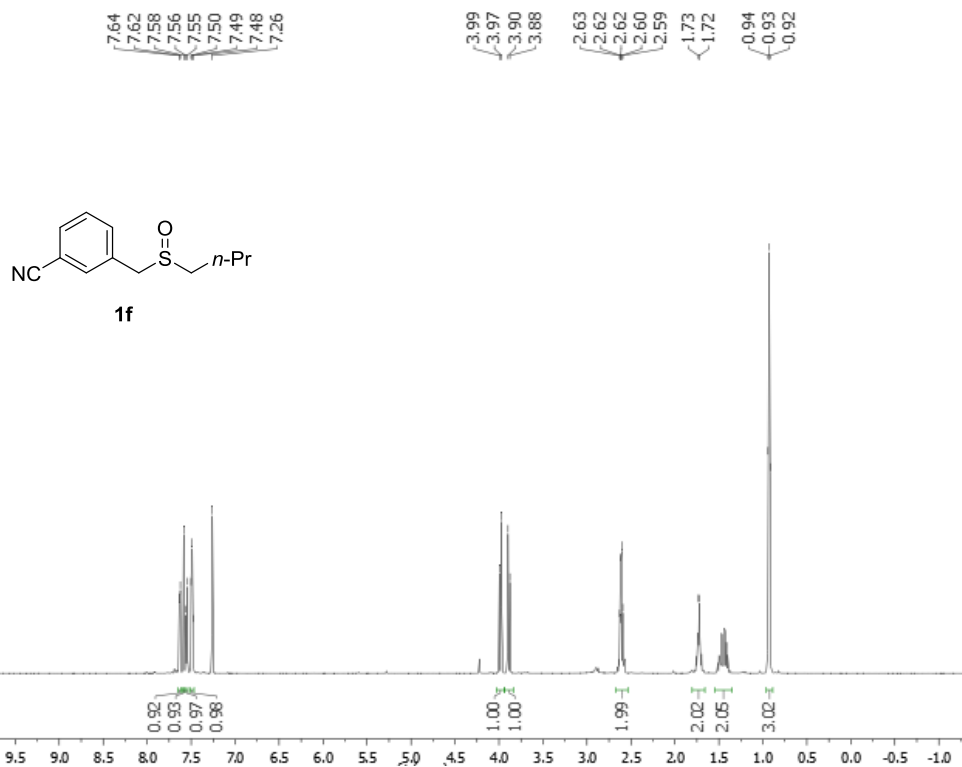

ZYL-01-23(1f)  
13C NMR

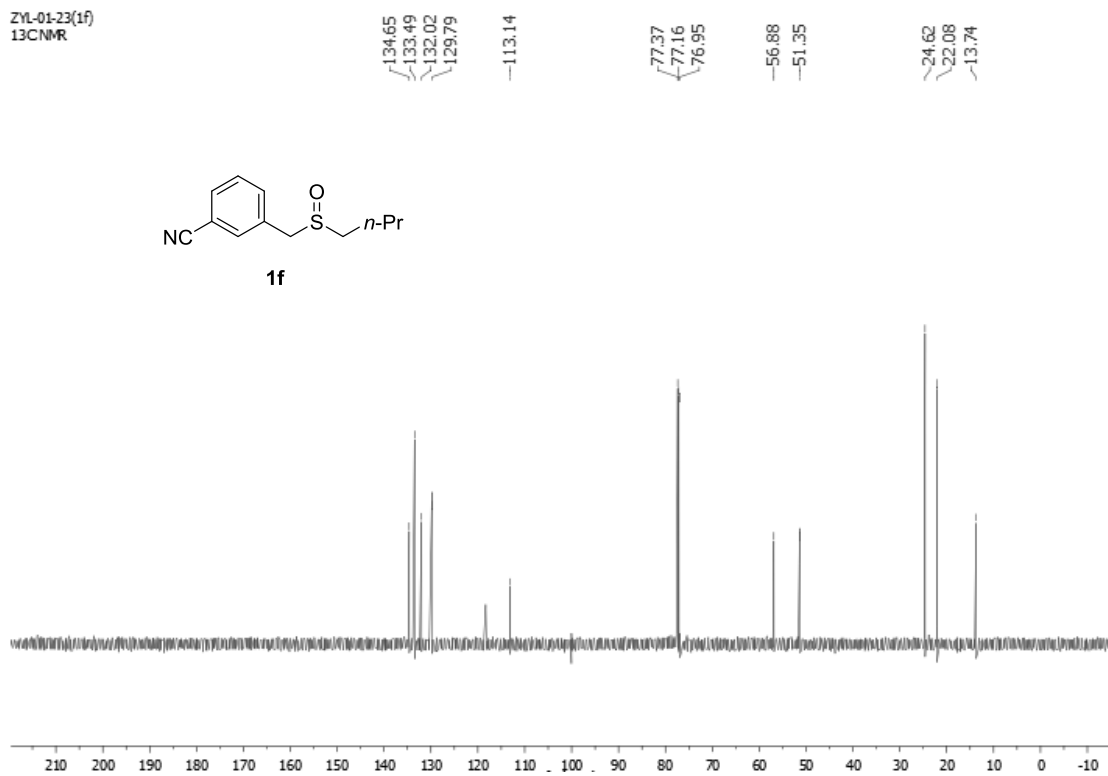

ZWZ-08-47B(1g)  
1H NMR

7.26  
7.18  
7.18  
7.17  
7.16  
7.15  
7.15  
7.14

4.09  
4.07  
3.94  
3.92

2.61  
2.60  
2.36

1.73  
1.69  
1.42  
1.38  
0.89  
0.88  
0.87

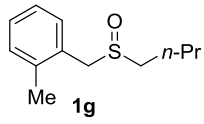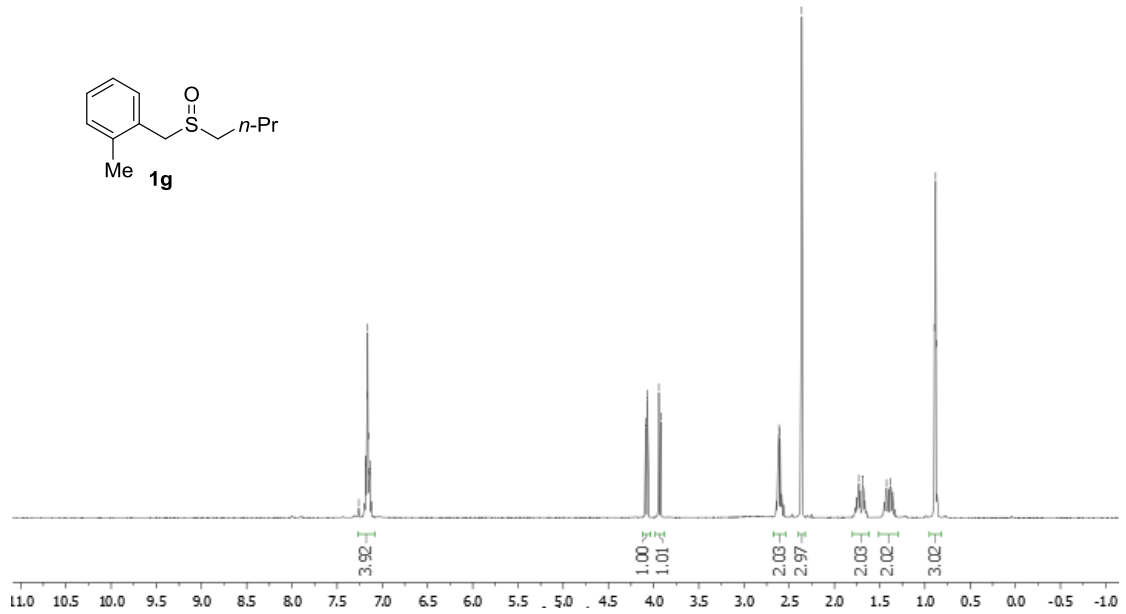

ZWZ-08-47B(1g)  
13C NMR

137.26  
130.91  
130.73  
128.73  
128.46  
126.40

77.37  
77.16  
76.95

56.95  
51.06

24.45  
21.94  
19.76  
13.61

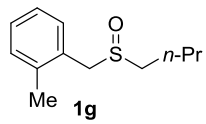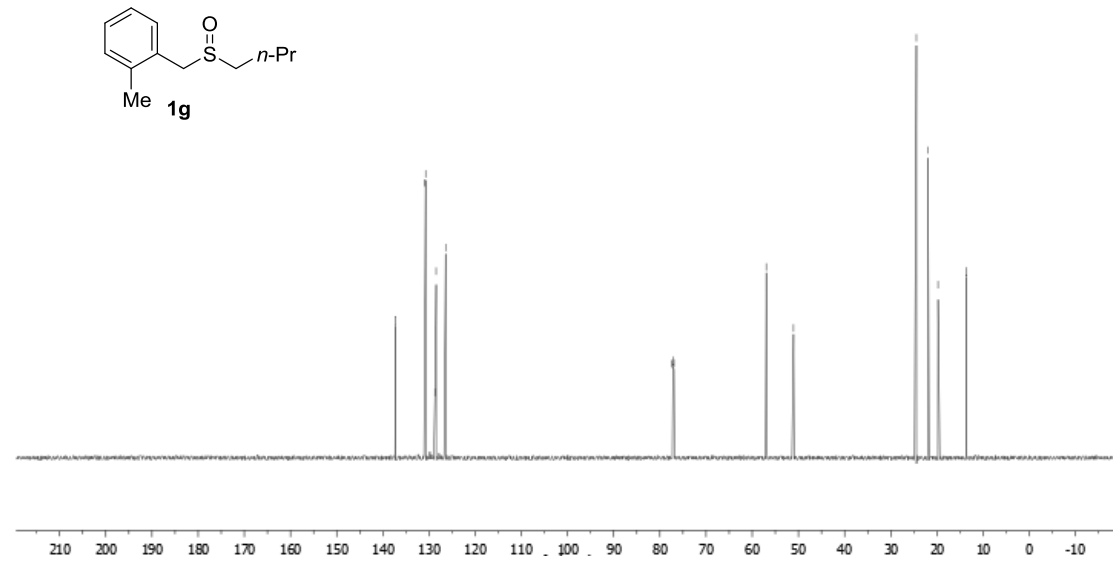

ZWZ-08-48B(1h)  
1H NMR

7.67  
7.67  
7.66  
7.66  
7.58  
7.57  
7.56  
7.56  
7.50  
7.49  
7.43  
7.43  
7.42  
7.42

4.23  
4.20  
4.02  
4.00  
2.69  
2.68  
2.67  
2.66  
2.66  
2.65  
1.73  
1.73  
1.71  
1.69  
1.69  
0.89

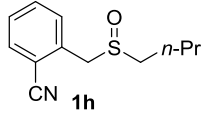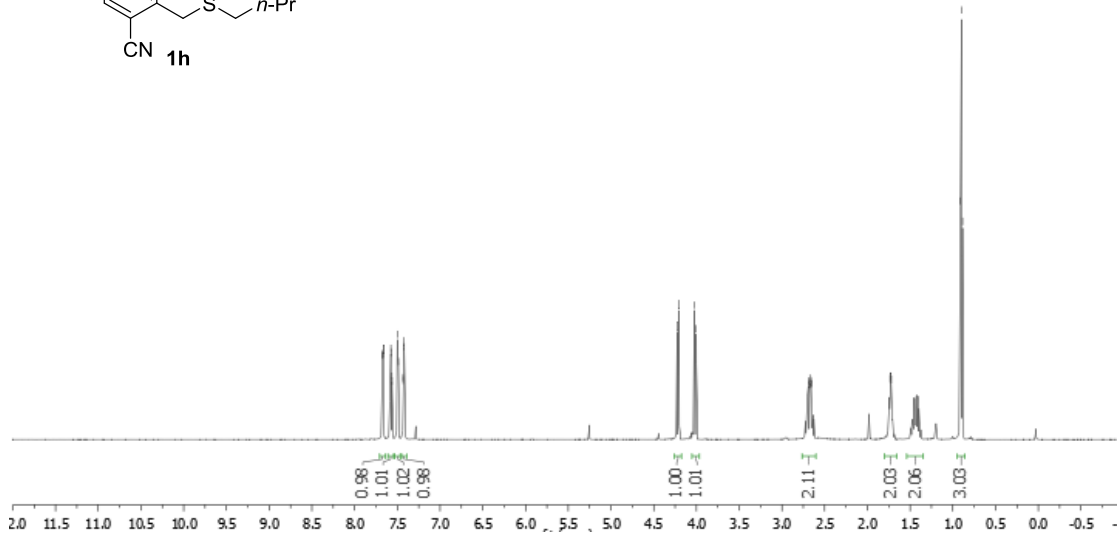

ZWZ-08-48B(1h)  
13C NMR

134.12  
133.02  
133.00  
131.65  
128.72  
117.40  
113.16

77.37  
77.16  
76.95  
55.78  
51.59  
24.45  
21.86  
13.54

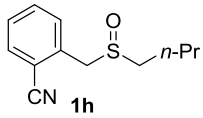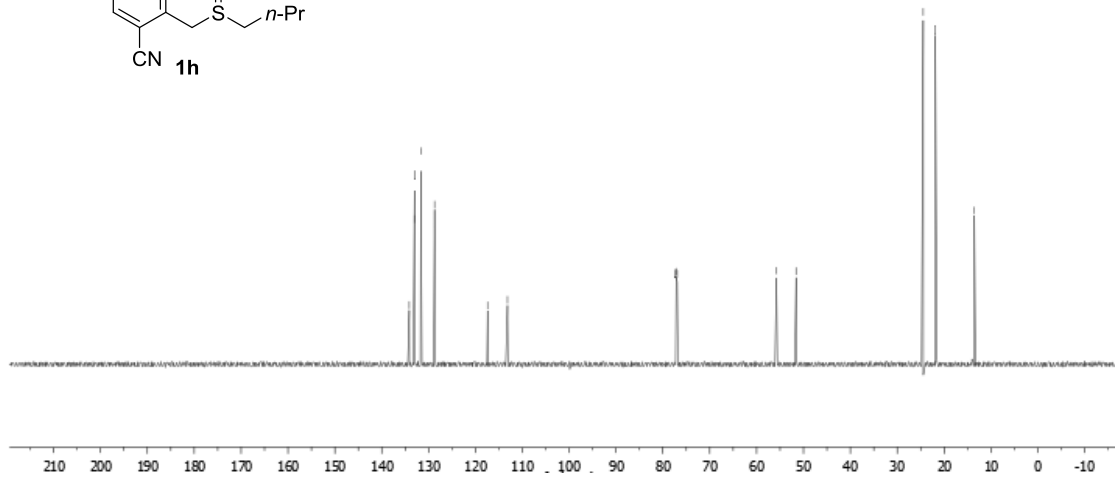



ZWZ-09-03B(1)  
1H NMR

7.86  
7.85  
7.84  
7.84  
7.83  
7.77  
7.52  
7.51  
7.51  
7.50  
7.50  
7.40  
7.40  
7.38  
7.38  
7.26

4.25  
4.23  
4.11  
4.08

-2.49

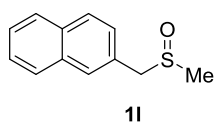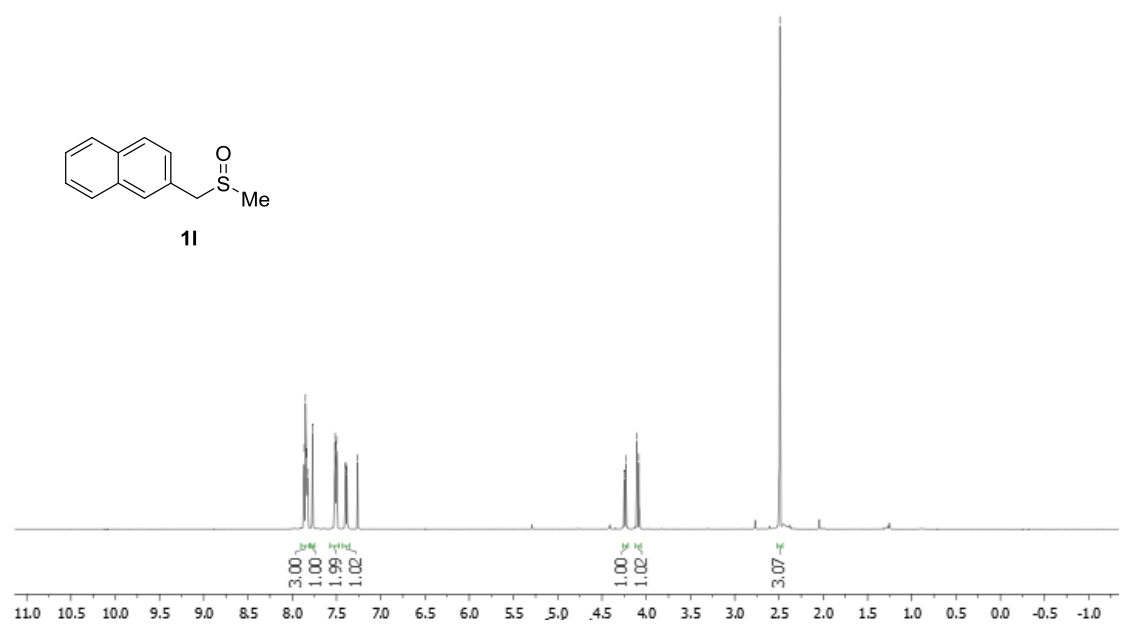

ZWZ-09-03B(1)  
13C NMR

133.43  
133.13  
129.44  
128.94  
127.97  
127.87  
127.48  
127.22  
126.73  
126.66

77.37  
77.16  
76.95

-60.64

-37.43

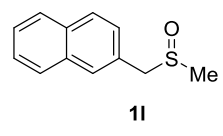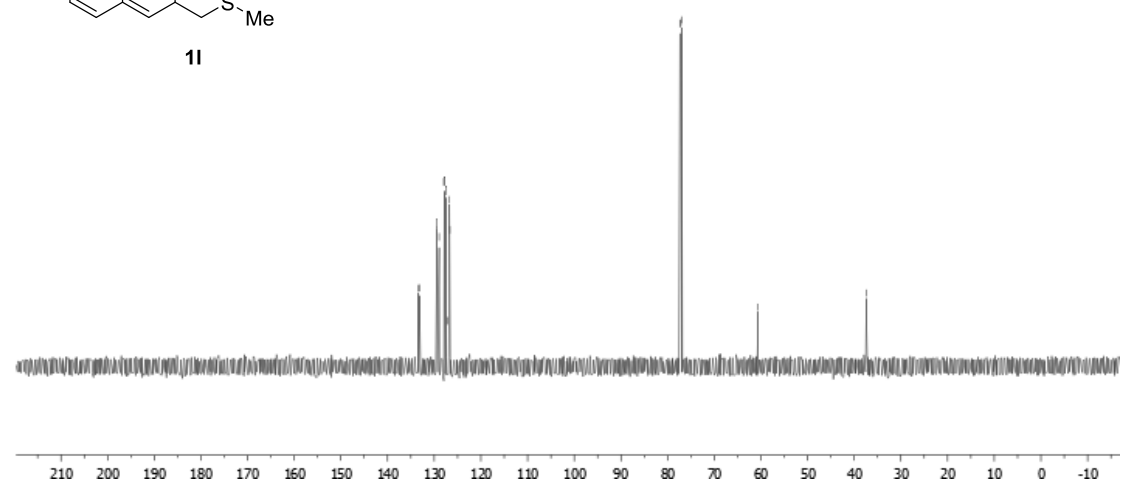

ZYL-01-30(1n)  
1H NMR

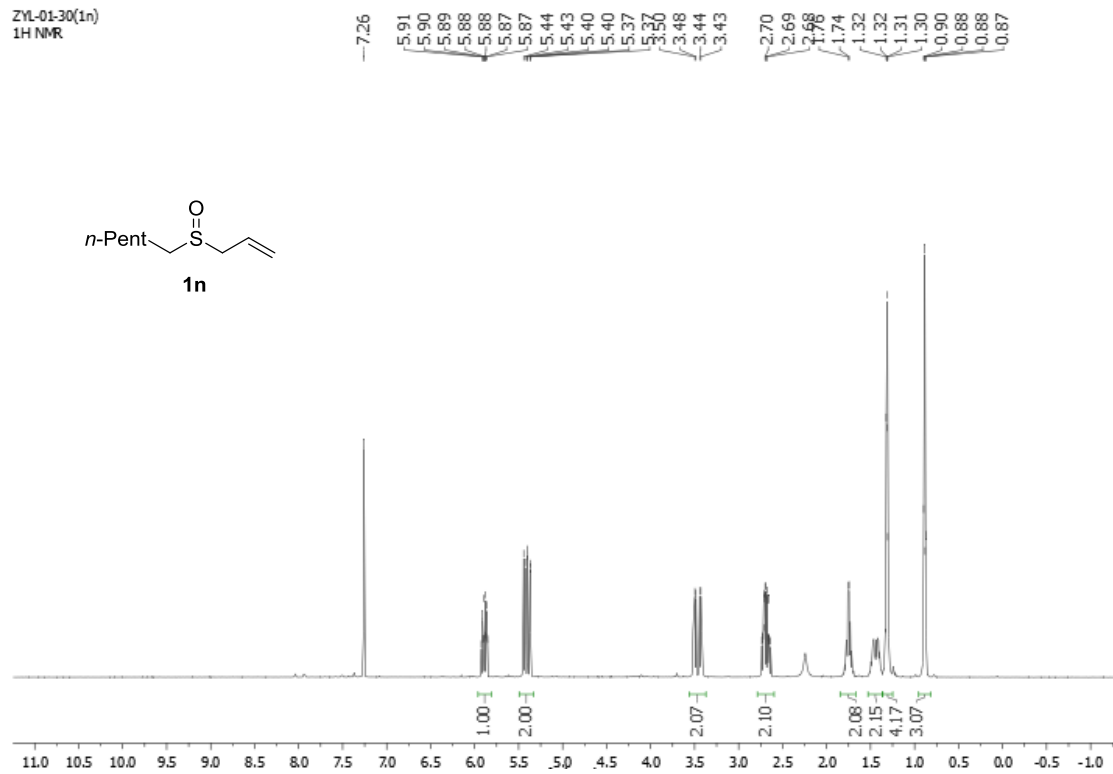

ZYL-01-30(1n)  
13C NMR

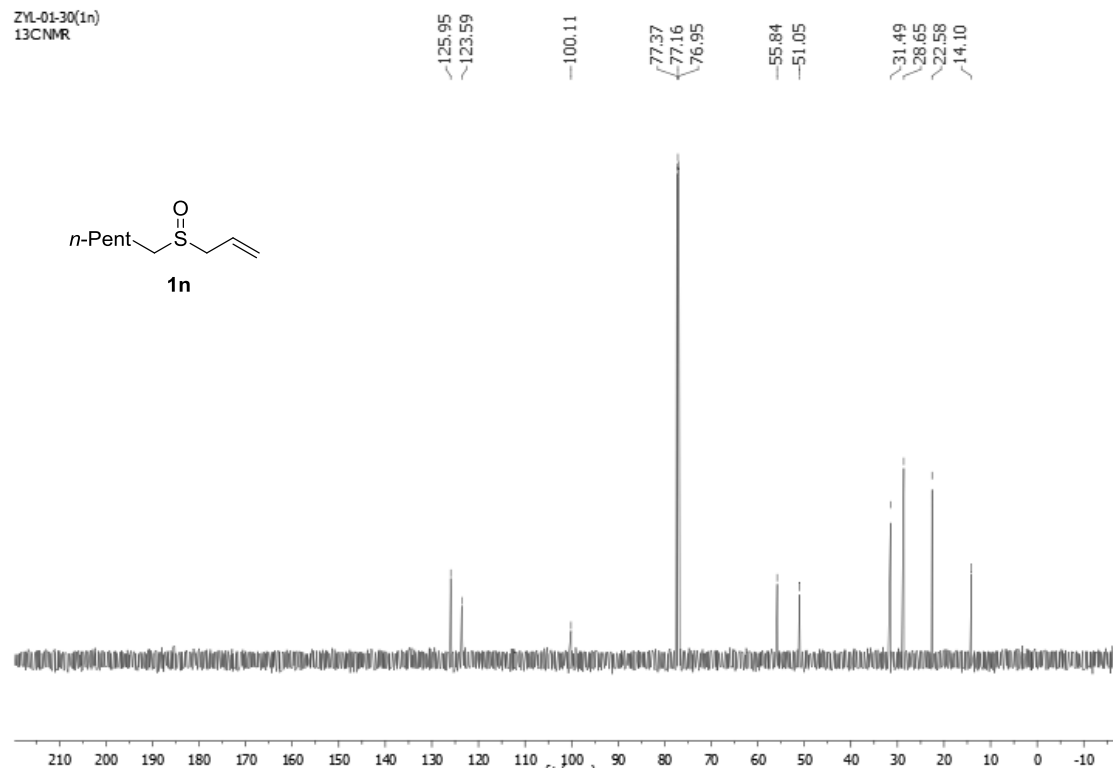

ZYL-01-34-1-600(1o)  
1H NMR

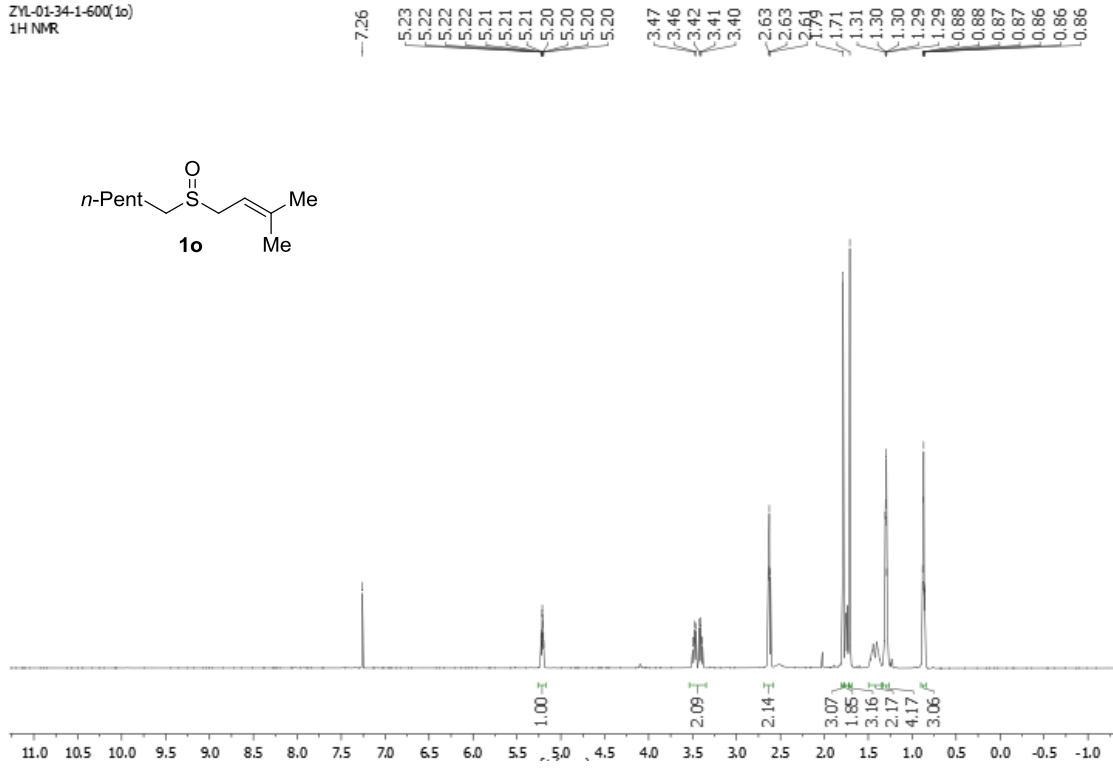

ZYL-01-34-1-600(1o)  
13C NMR

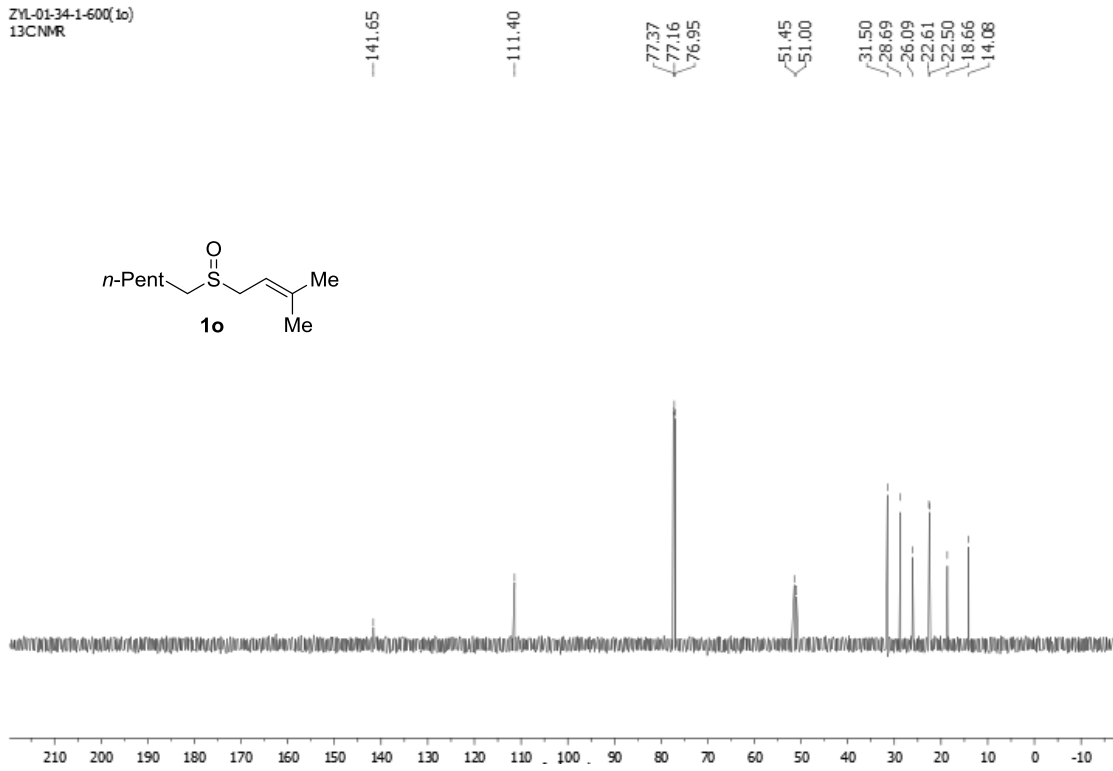

ZVL-01-31(1r)  
1H

-7.26

3.57  
3.57  
3.56  
2.90  
2.88  
2.44  
2.43  
1.81  
1.79  
1.77  
1.46  
1.35  
1.34  
1.33  
1.32  
1.31  
1.31  
0.91  
0.89  
0.88

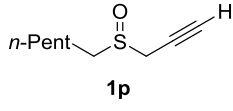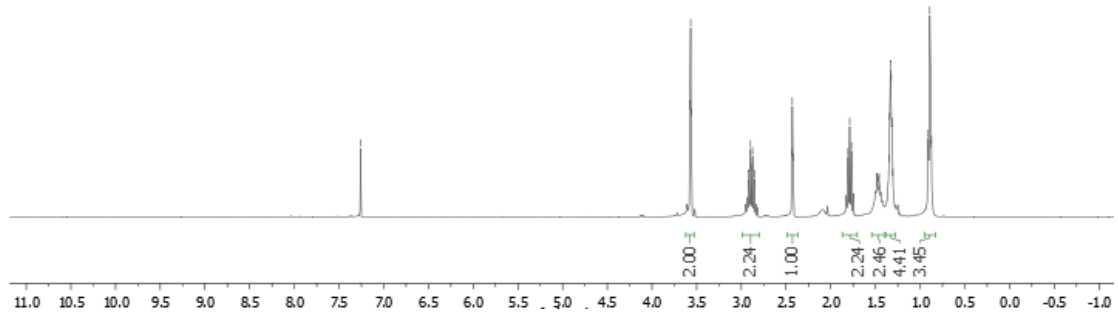

ZVL-01-31(1r)  
13CNMR

77.37  
77.16  
76.95  
76.38  
72.70

-51.56

-41.90

-31.46

-28.59

-22.51

-14.09

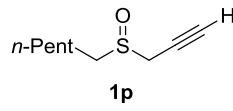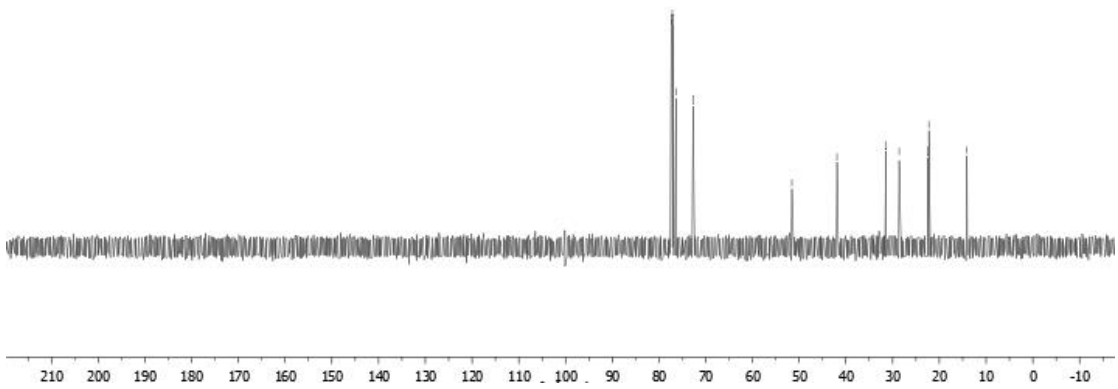

ZWZ-09-14D-3(15)  
<sup>1</sup>H NMR

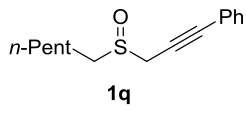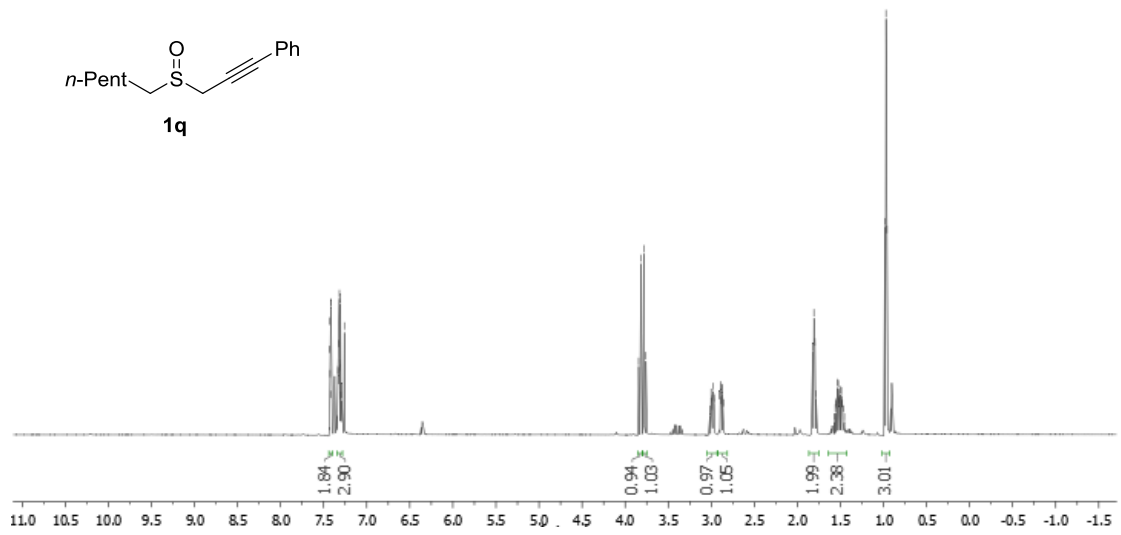

ZWZ-09-14D-3(15)  
<sup>13</sup>C NMR

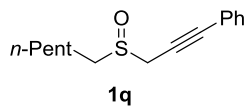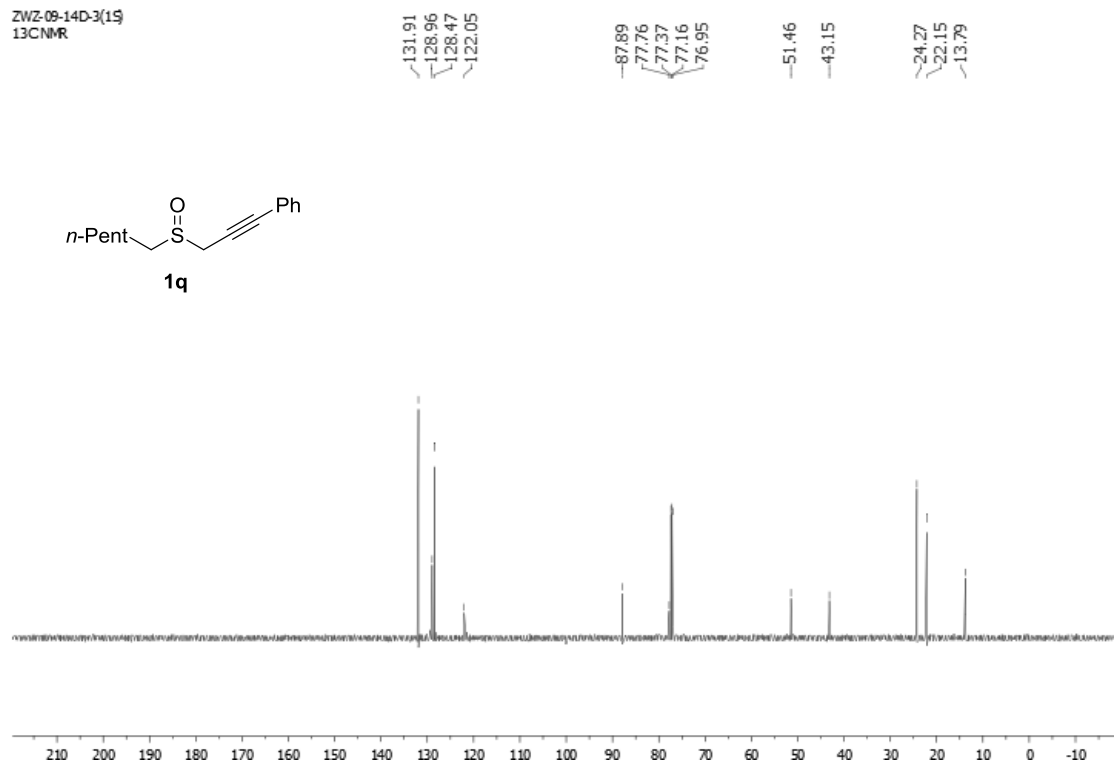

ZWZ-08-368(1u)  
1H NMR

-7.26

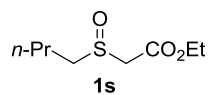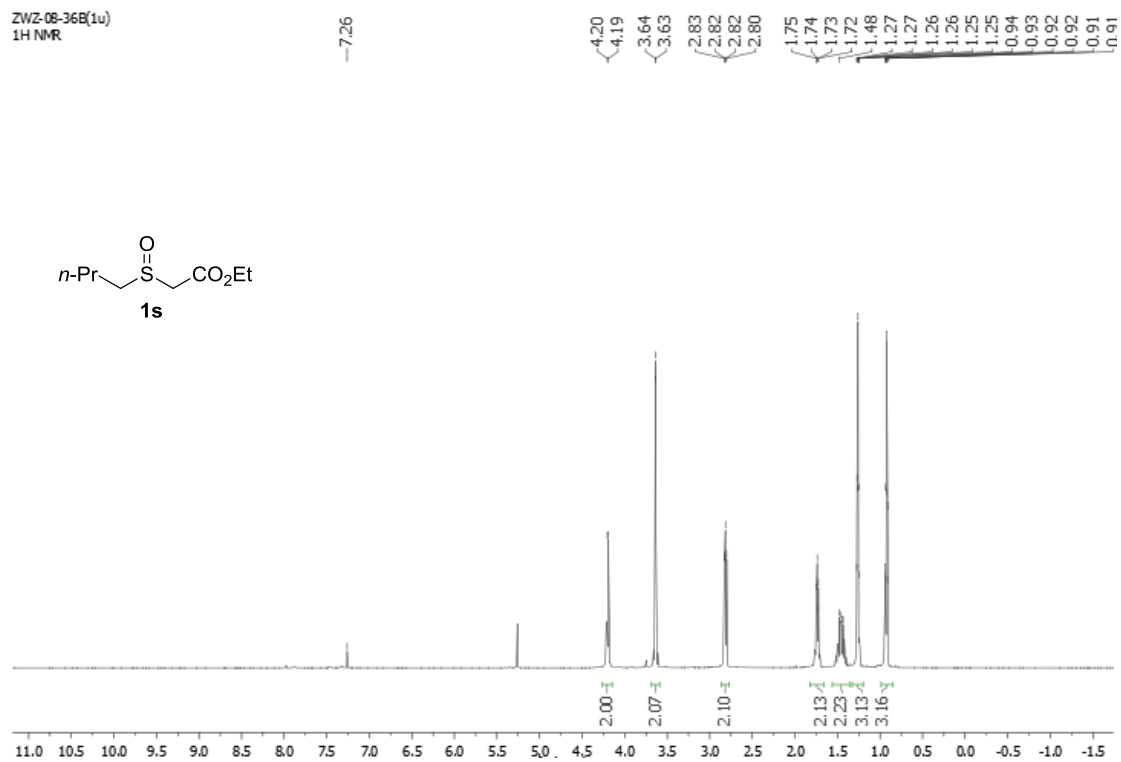

ZWZ-08-368(1u)  
13C NMR

-165.20

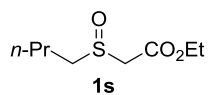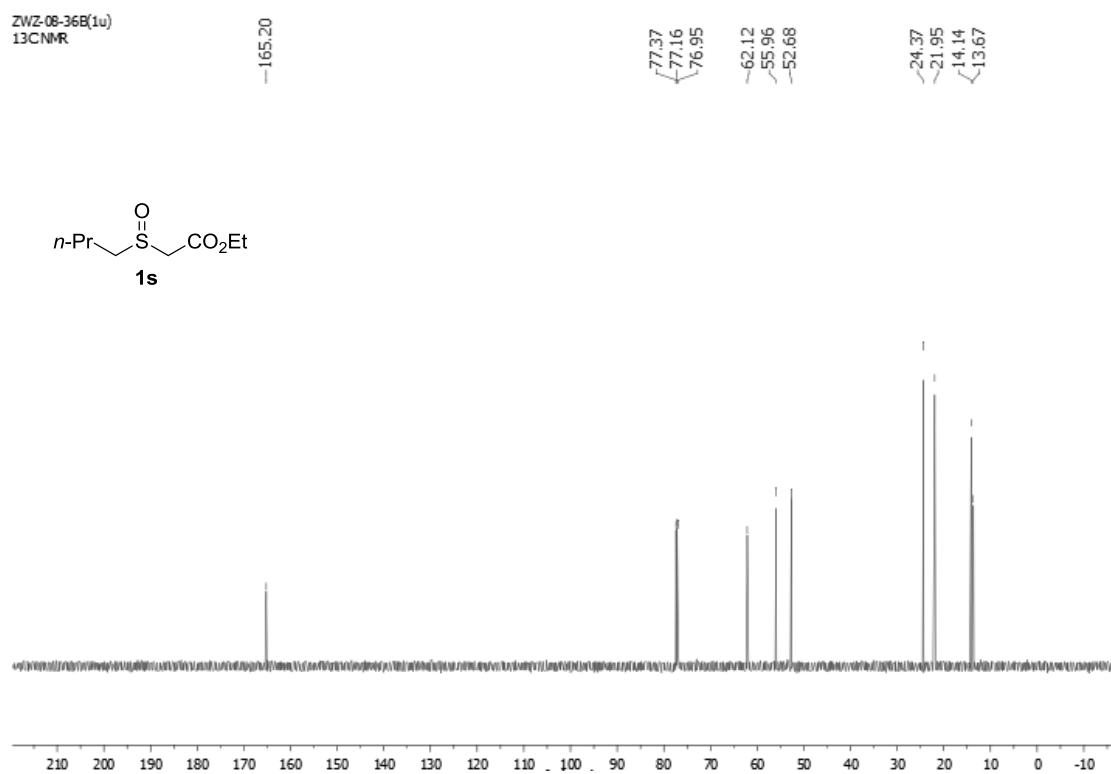

ZYL-01-25-1(1w)  
1H NMR

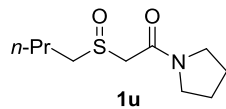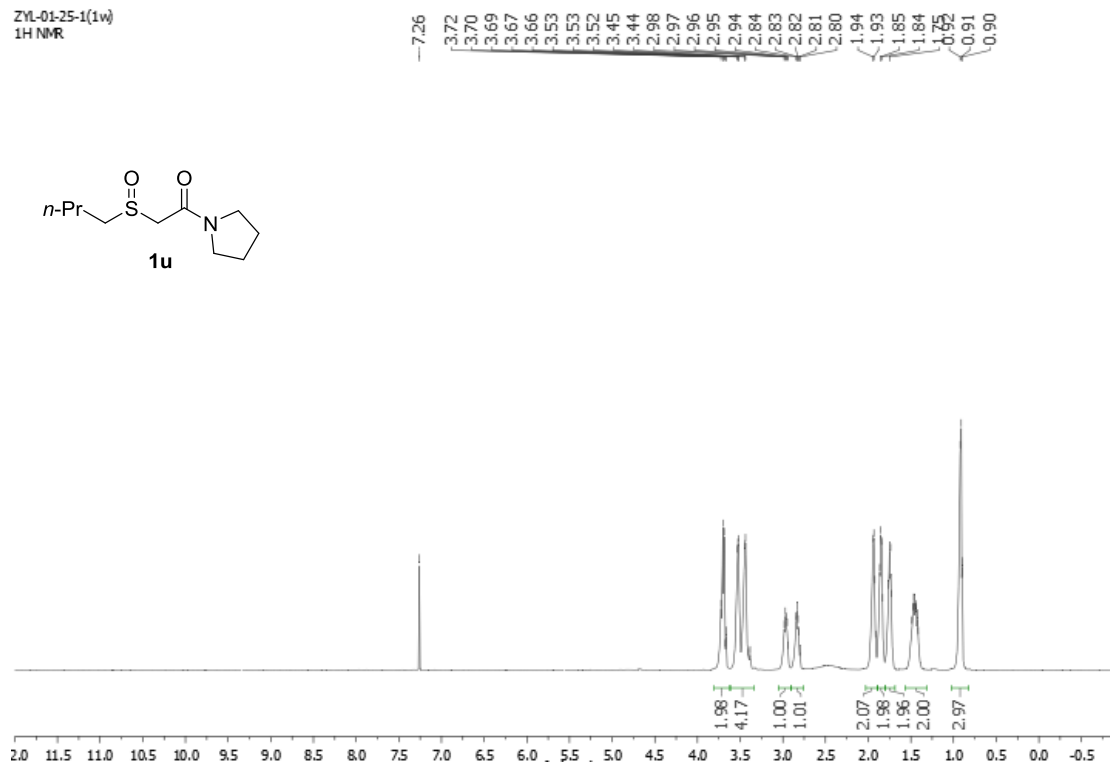

ZYL-01-25-1(1w)  
13C NMR

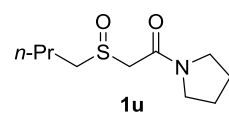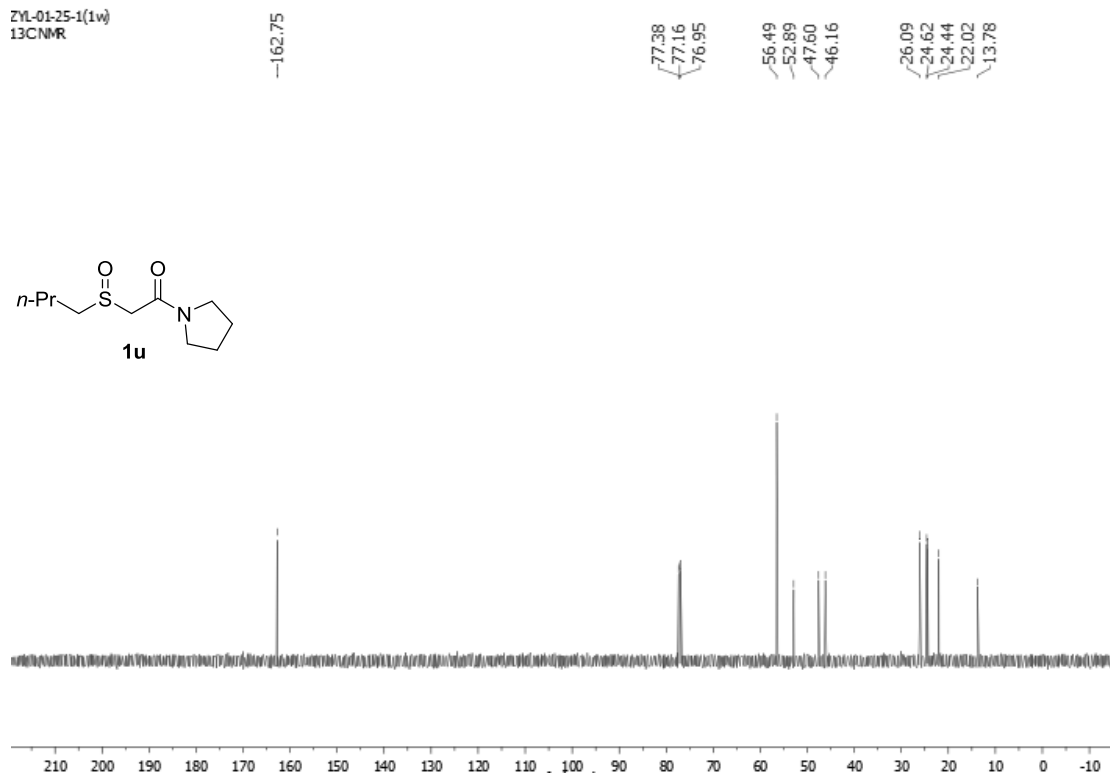

ZWZ-08-28Q(1x)  
1H NMR

7.37  
7.36  
7.36  
7.35  
7.35  
7.34  
7.34  
7.34  
7.33  
7.33  
7.26  
3.55  
3.54  
3.51  
3.50  
3.48  
3.47  
3.43  
3.43  
3.42  
3.39  
3.37  
3.36  
3.35  
1.94  
1.93  
1.92  
1.91  
1.89  
1.88  
1.87  
1.86

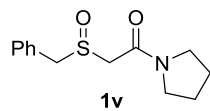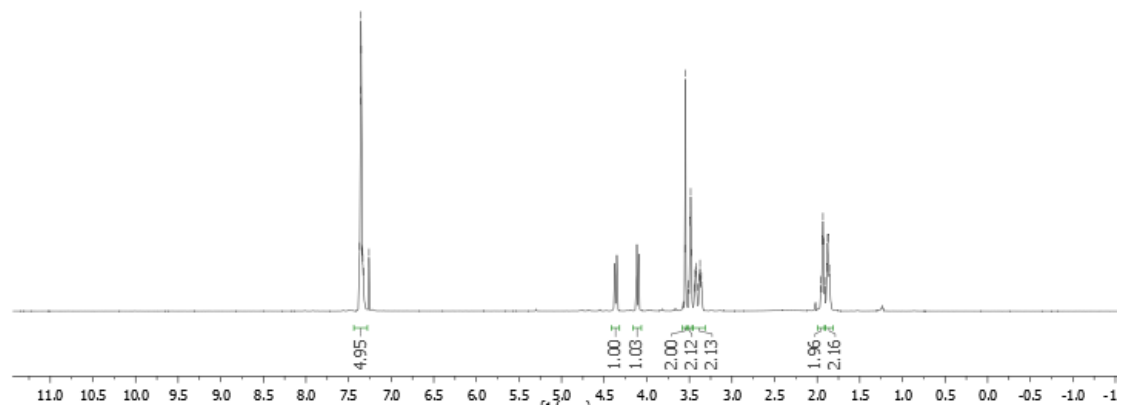

ZWZ-08-28Q(1x)  
13C NMR

-162.85  
130.67  
129.61  
128.87  
128.48  
77.37  
77.16  
76.95  
57.50  
53.77  
47.41  
46.11  
26.05  
24.45

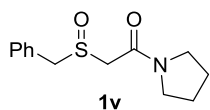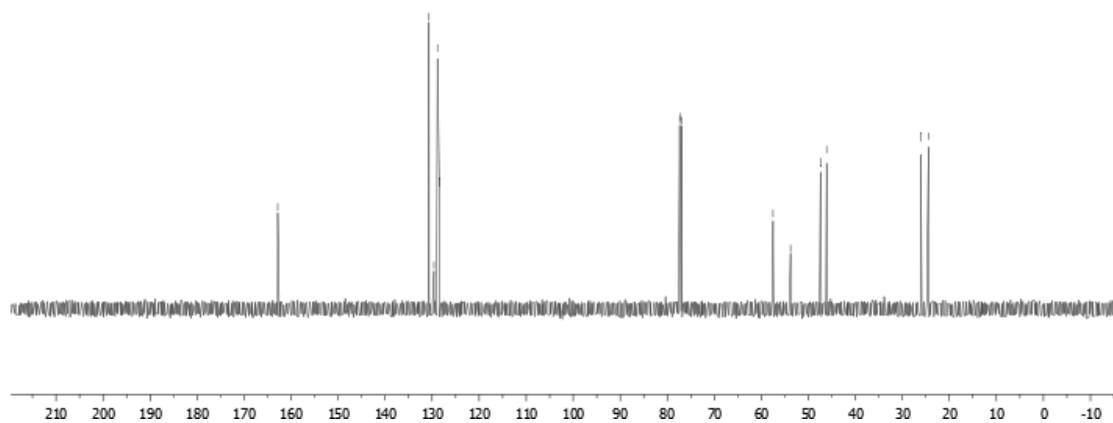



ZWZ-08-99C(1a)  
1H

-7.26

4.75  
4.75  
4.74  
4.74  
3.67  
3.65  
3.65  
2.83  
2.82  
2.82  
1.78  
0.97  
0.95  
0.94  
0.90  
0.89  
0.89  
0.88  
0.88  
0.87  
0.75  
0.74  
0.73  
0.73

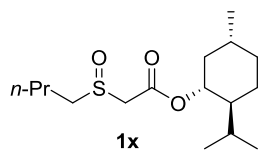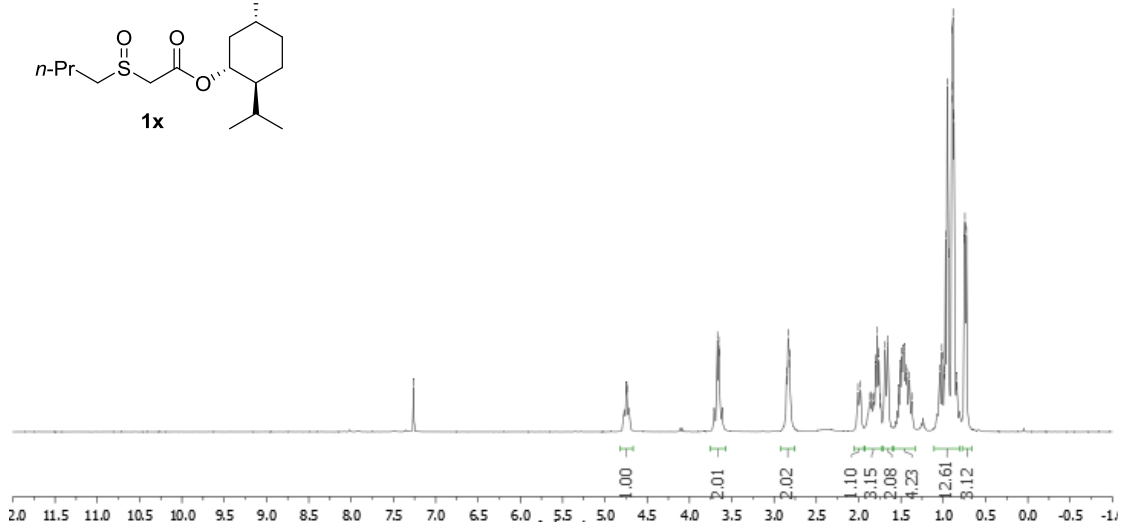

ZWZ-08-99C(1a)  
13CNMR

-164.78

77.37  
77.16  
76.95  
76.49  
56.51  
56.38  
52.82  
52.70  
46.77  
40.77  
40.75  
34.06  
31.43  
26.11  
24.36  
24.29  
23.18  
21.96  
20.77  
16.11  
16.09  
13.69

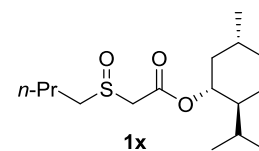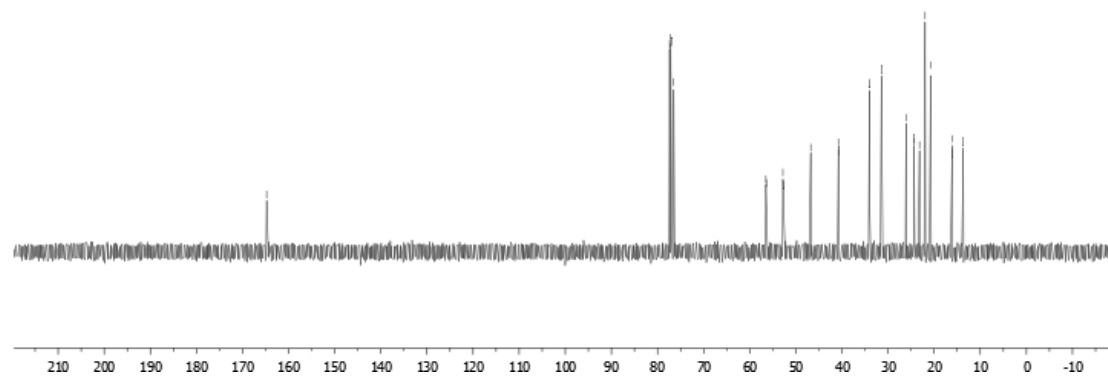

ZWZ-08-107D-1 (1ab)  
1H NMR

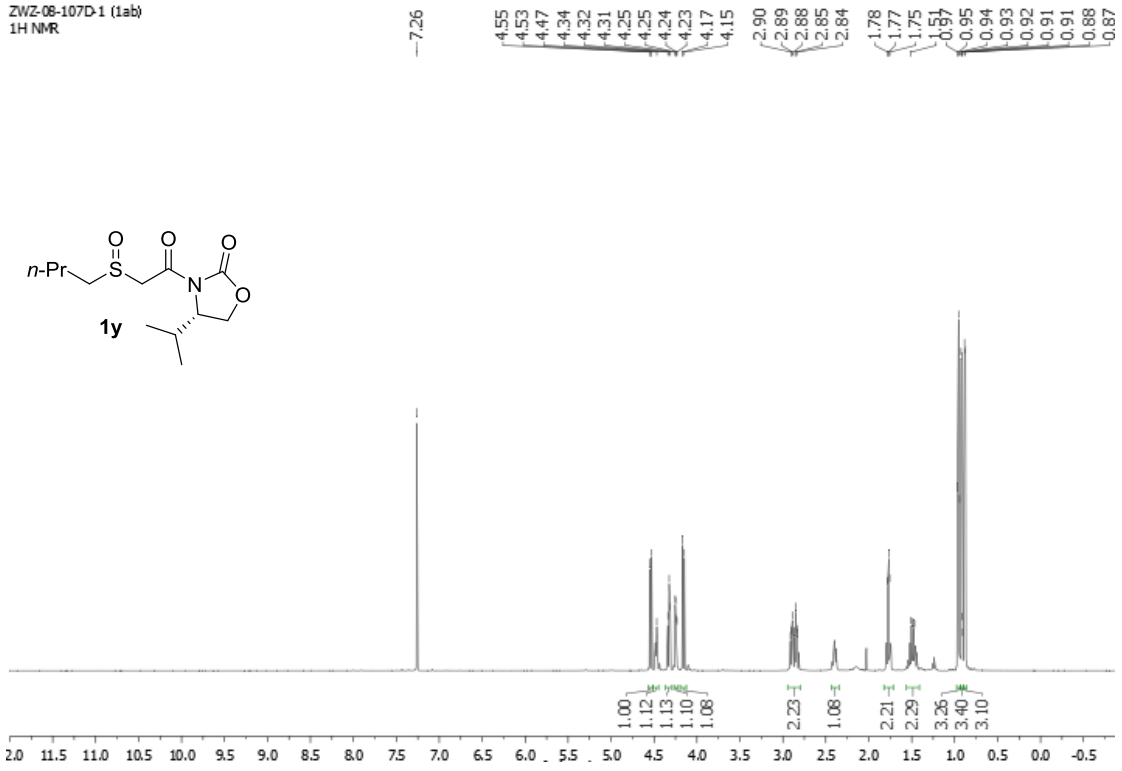

ZWZ-08-107D-1 (1ab)  
13C NMR

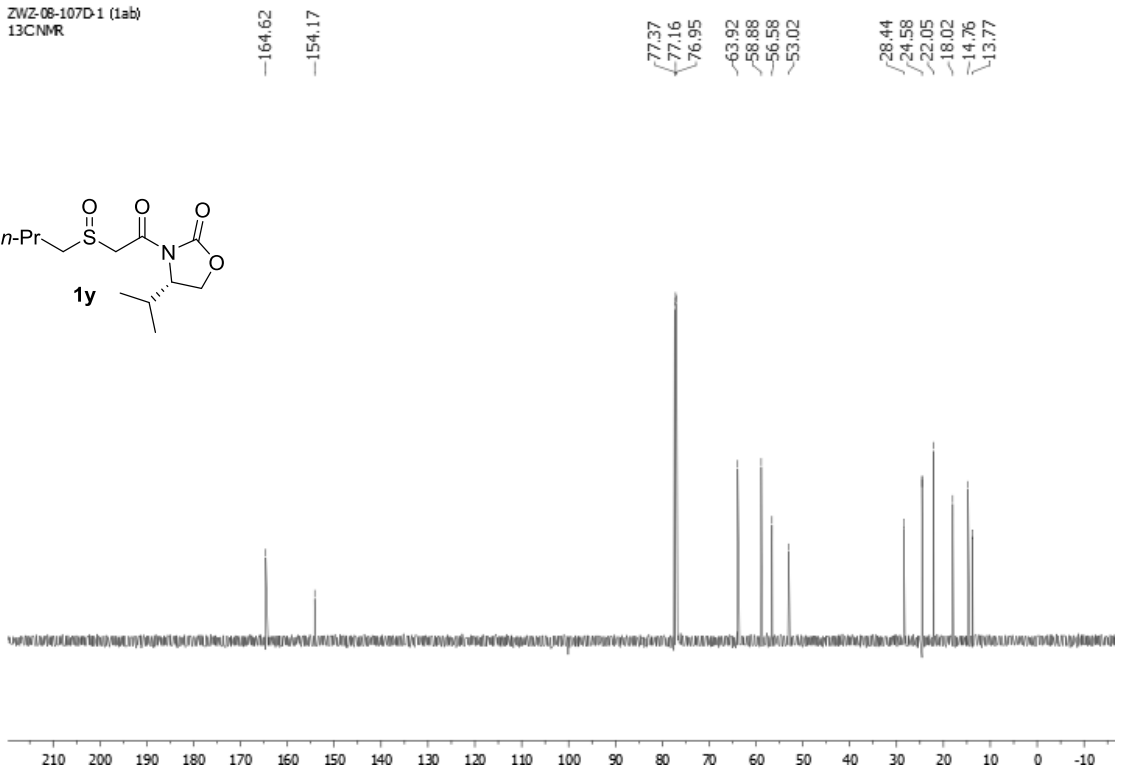

ZWZ-08-50(2a)  
<sup>1</sup>H NMR

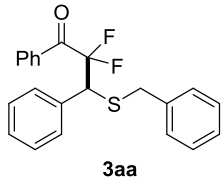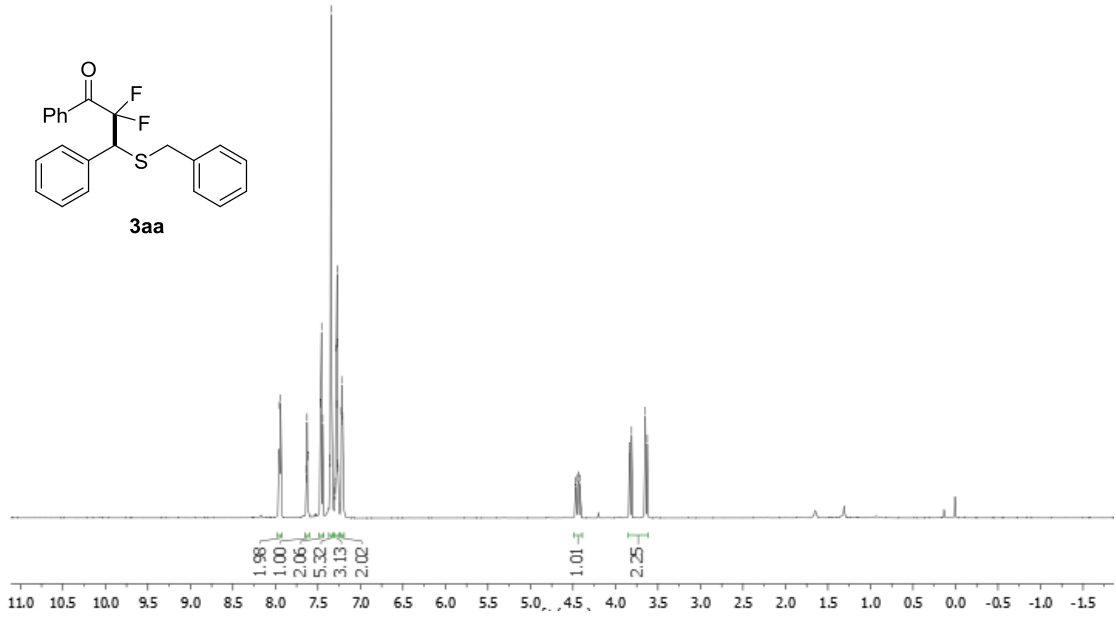

ZWZ-08-50(2a)  
<sup>13</sup>C NMR

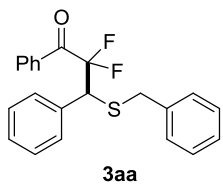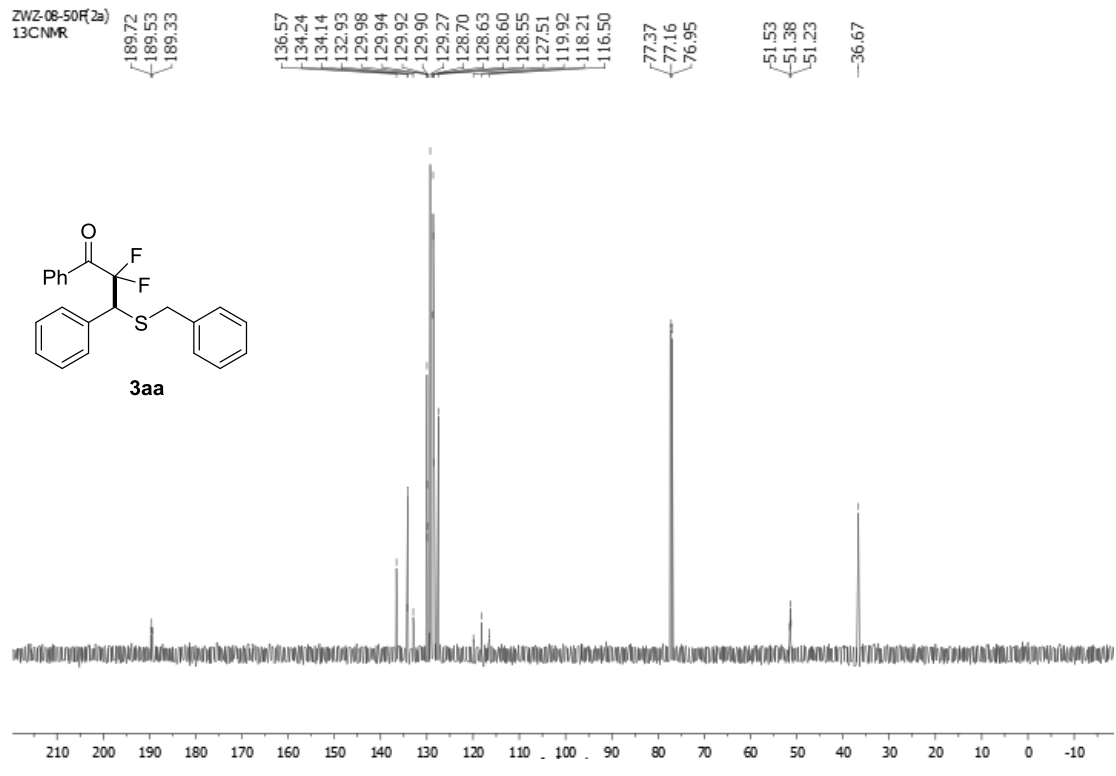

ZWZ-08-50R(2a)  
F19CPD

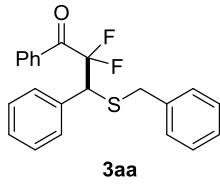

96.899  
97.336  
103.50  
103.98

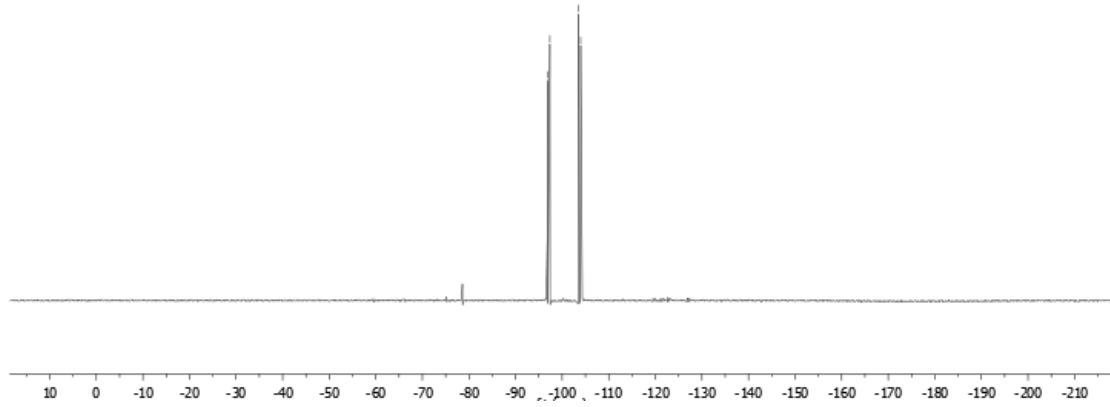

ZWZ-08-31-2(2b)  
1H NMR

8.01 7.99 7.62 7.61 7.60 7.48 7.47 7.46 7.36 7.35 7.33 7.33 7.32 7.31 7.30 7.26 4.61 4.59 4.58 4.56 2.52 2.52 2.51 2.50 2.49 1.47 1.46 1.45 1.31 1.31 1.30 1.29 1.29 1.28 1.27 1.27 0.83 0.82 0.81

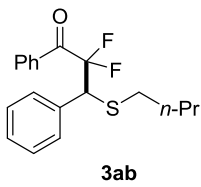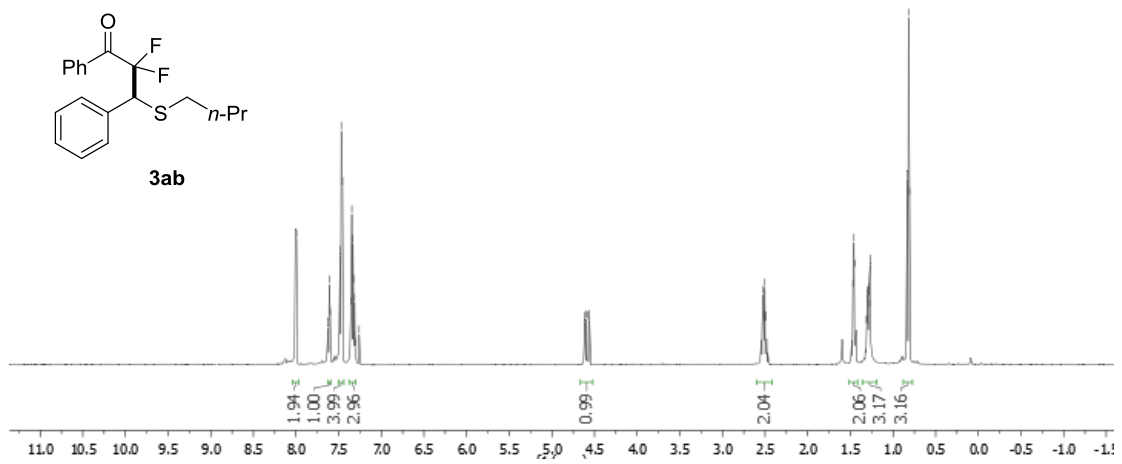

ZWZ-08-31-2(2b)  
13CNMR

190.43  
190.23  
190.04

134.87  
134.13  
133.26  
130.04  
130.02  
130.00  
129.96  
128.70  
128.57  
128.48  
119.93  
118.21  
116.49

77.37  
77.16  
76.95

52.64  
52.49  
52.34

32.69  
31.08

-21.82  
-13.64

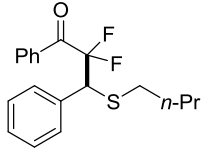

3ab

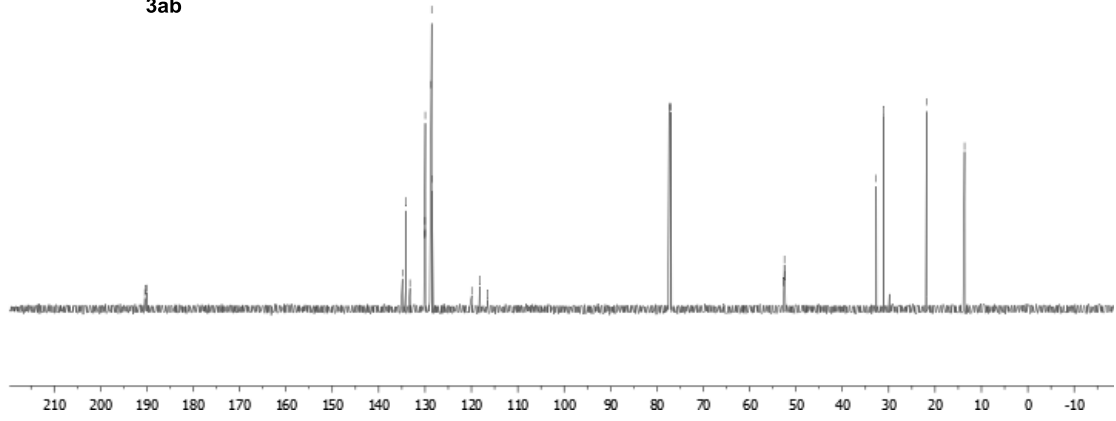

ZWZ-08-31-2(2b)  
F19CDF

95.73  
96.21  
105.14  
105.62

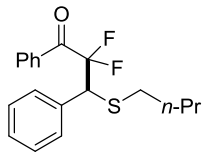

3ab

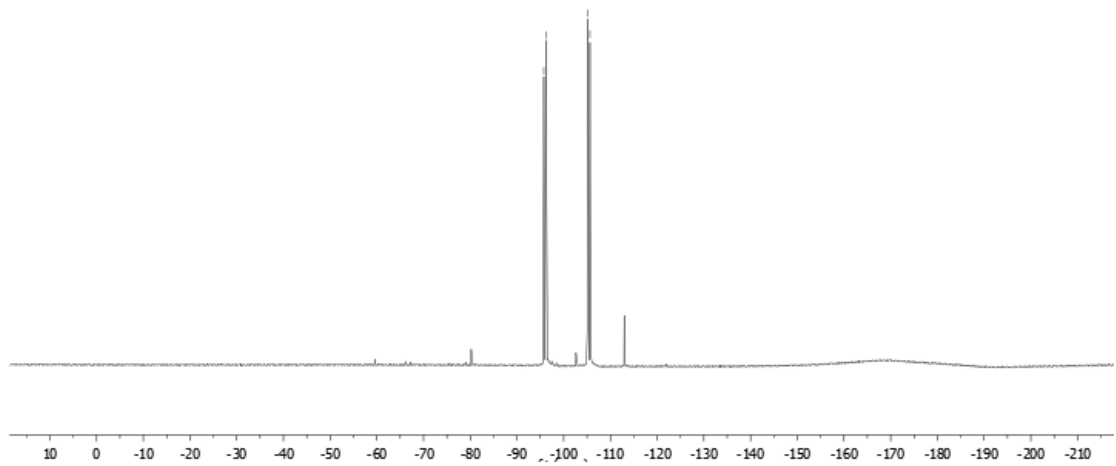

ZWZ-08-50B(2c)  
1H NMR

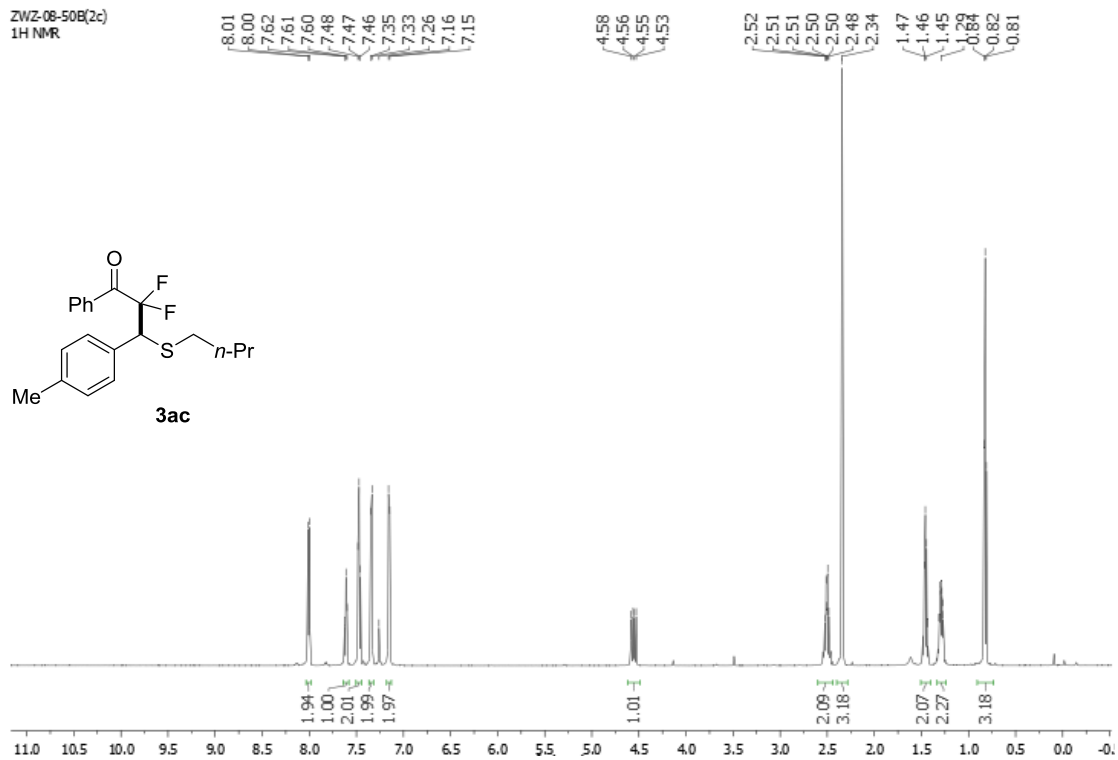

ZWZ-08-50B(2c)  
13C NMR

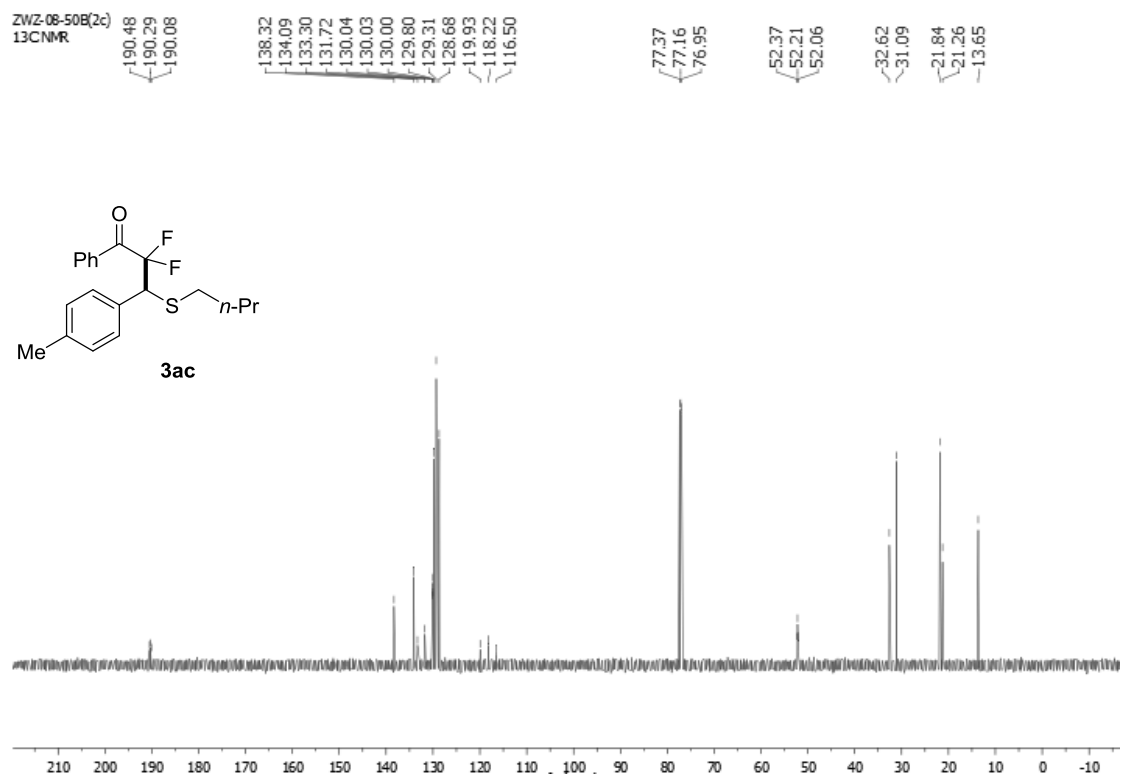

ZWZ-08-50B(2c)  
F19CPD

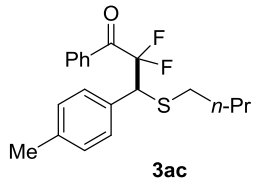

95.87  
96.35  
-105.18  
-105.65

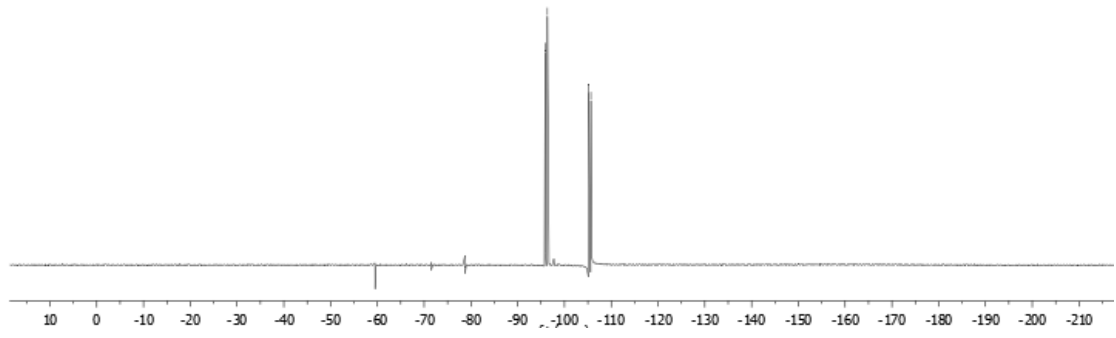

ZWZ-08-50G1(2d)  
1H NMR

8.02  
7.64  
7.62  
7.61  
7.49  
7.48  
7.47  
7.47  
7.36  
7.34  
7.26  
4.58  
4.56  
4.55  
4.53  
2.53  
2.52  
2.51  
2.50  
2.49  
2.48  
2.47  
2.46  
1.48  
1.46  
1.45  
1.44  
1.43  
1.31  
1.30  
1.30  
1.29  
1.28  
1.27  
1.27  
0.83  
0.82

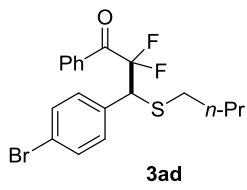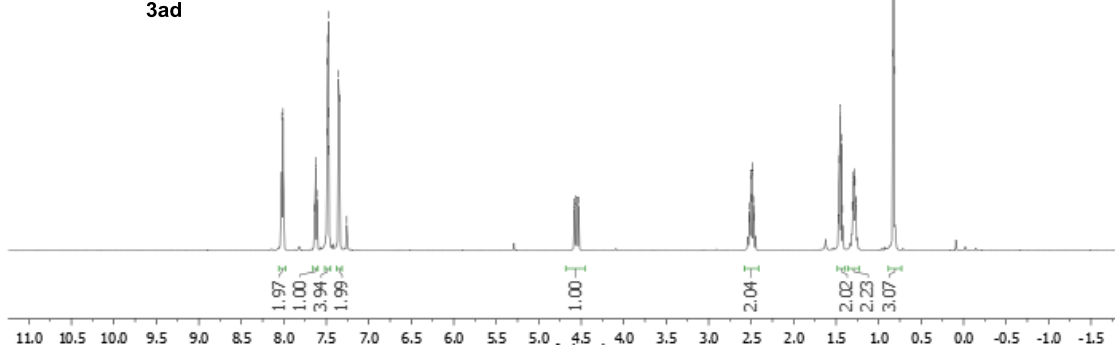

ZWZ-08-50C1(2d)  
13CNMR

190.00  
189.83  
189.63  
134.30  
134.10  
133.02  
131.72  
131.62  
130.06  
130.04  
130.01  
128.76  
122.64  
119.62  
117.90  
116.18

77.37  
77.16  
76.95

51.96  
51.80  
51.65

32.70  
31.02

21.79  
13.63

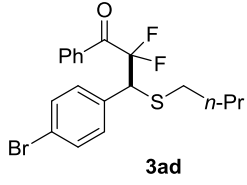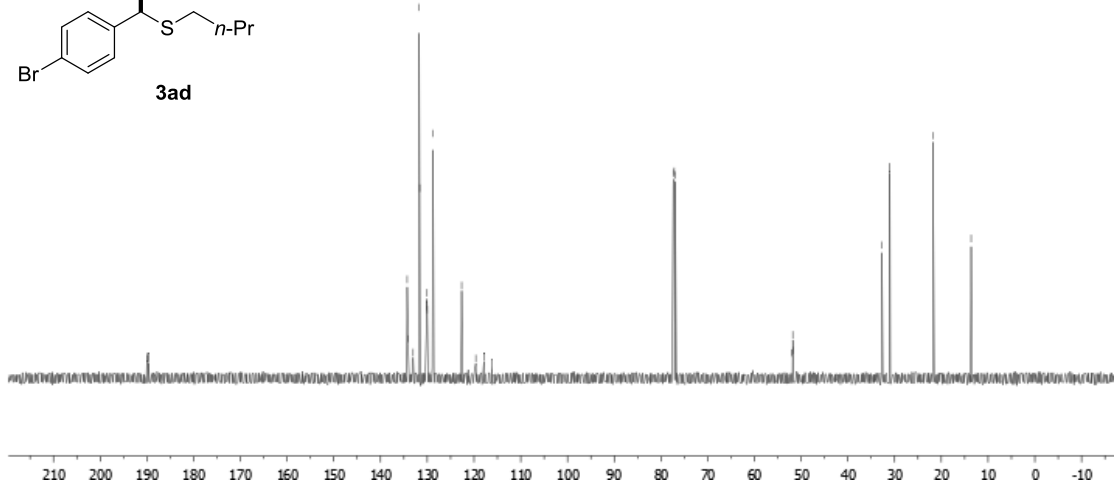

ZWZ-08-50C1(2d)  
F19CD

94.91  
95.39  
105.63  
106.12

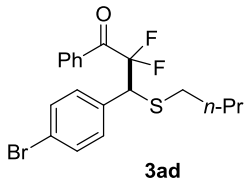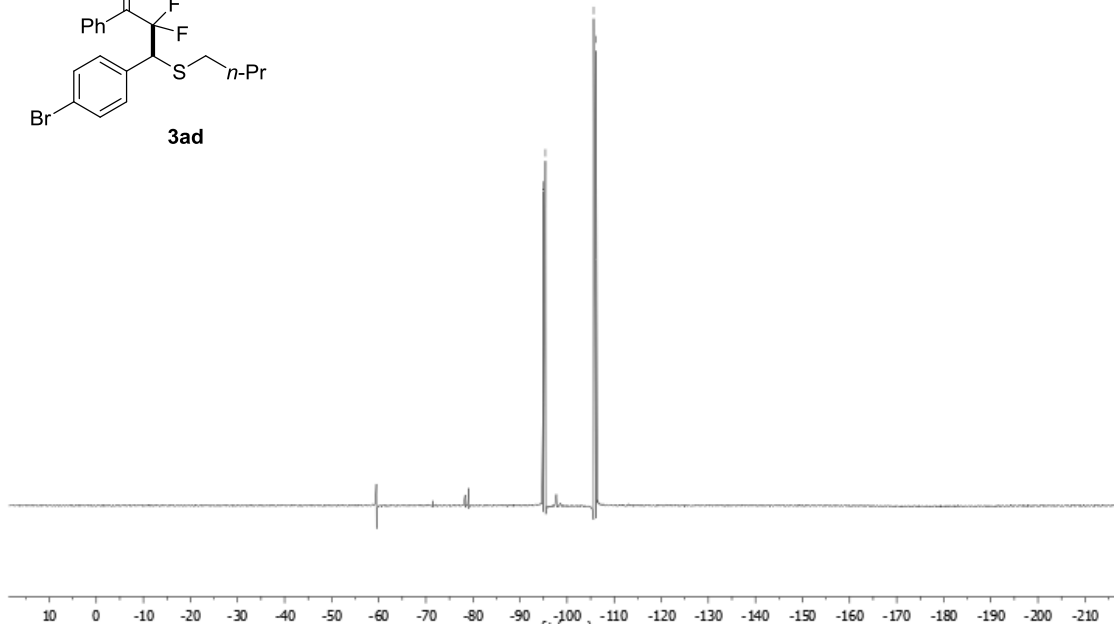



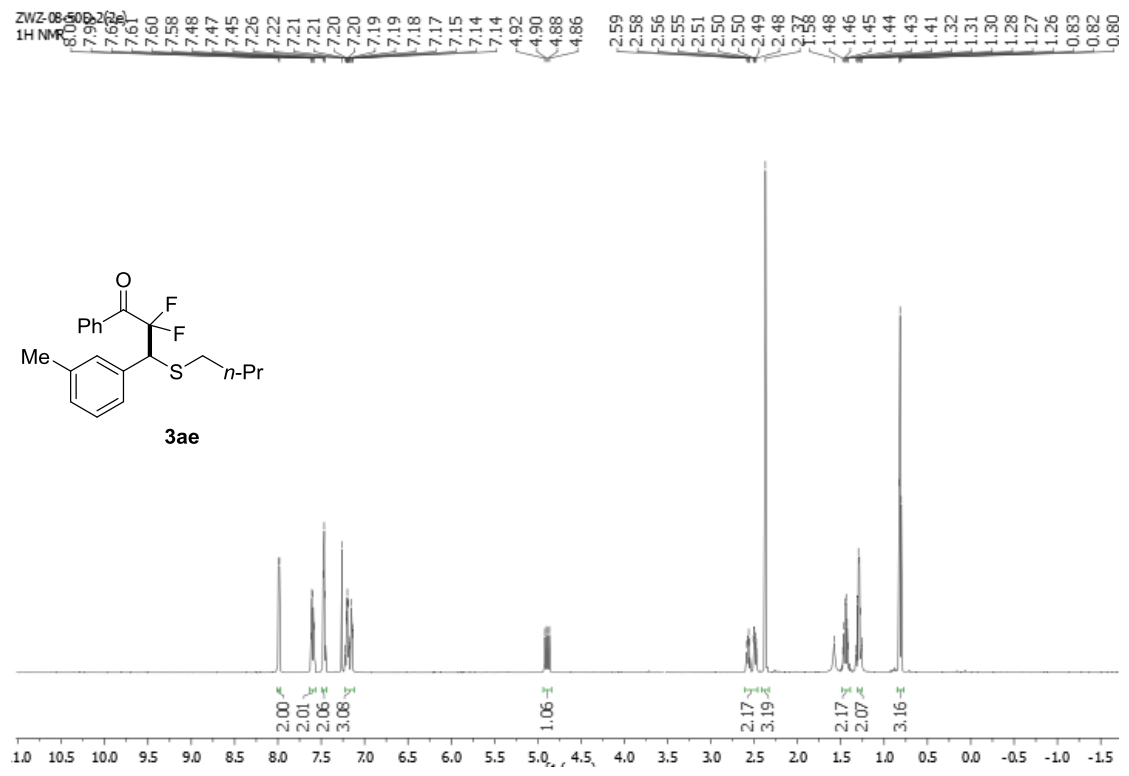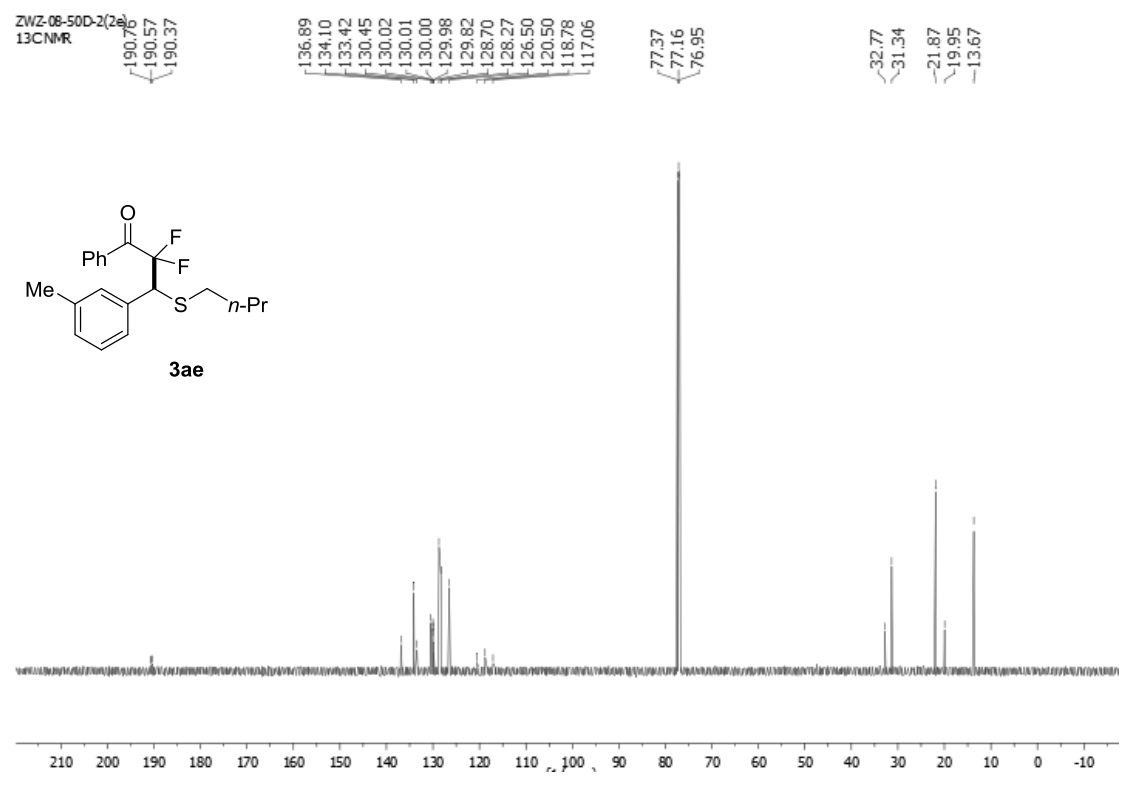

ZWZ-08-50D-2(2e)  
F19CPD

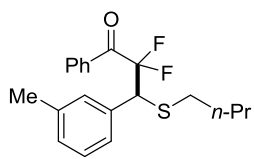

**3ae**

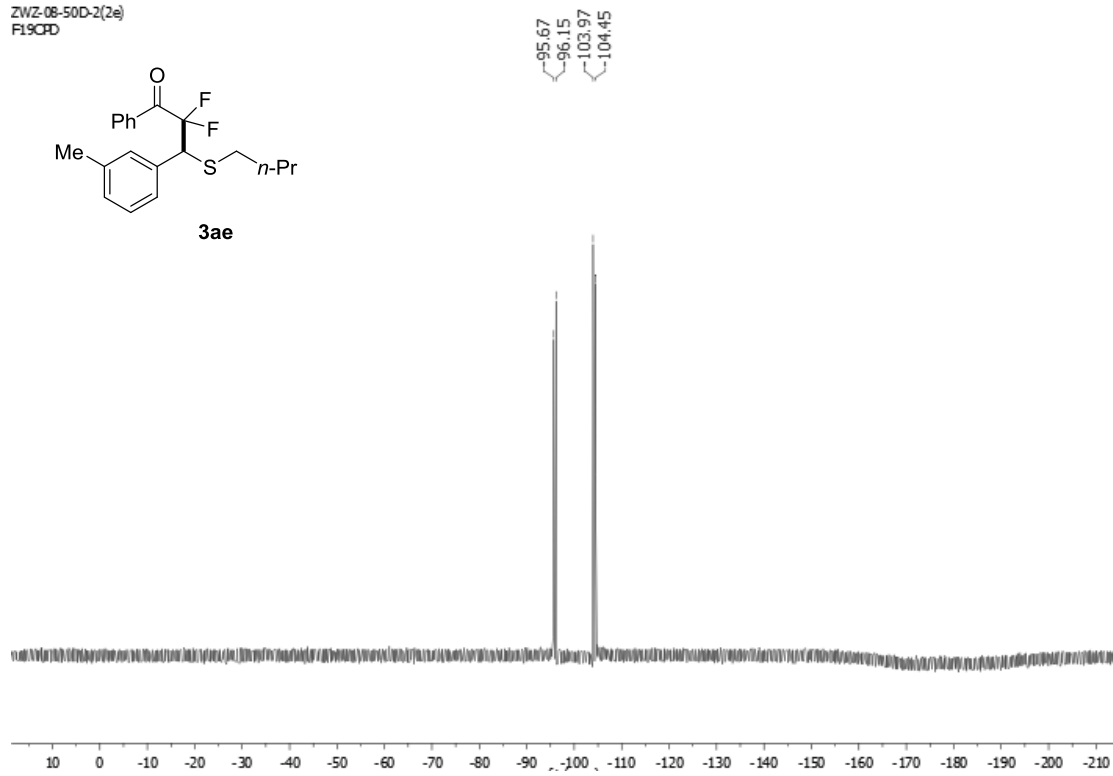

LW3-03-Q8 (3af)

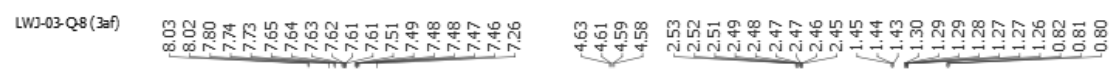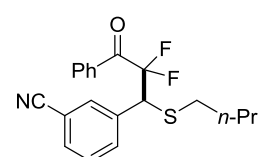

**3af**

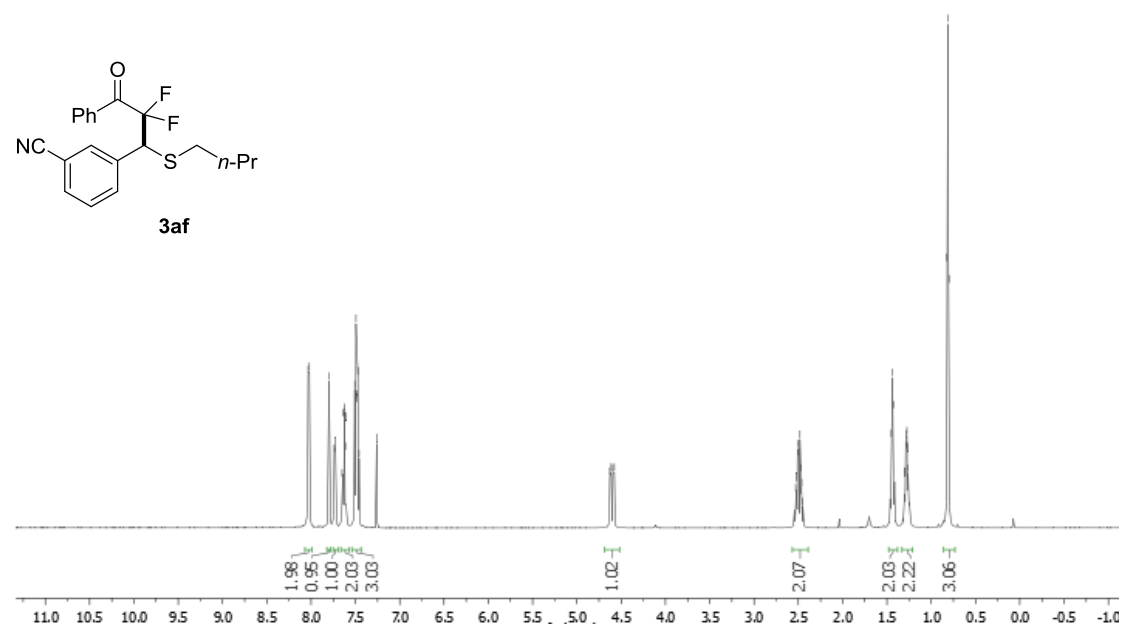

LWJ-03-Q8 (3af)

189.54  
189.34  
189.15

136.98  
134.49  
134.43  
133.50  
132.72  
132.03  
130.05  
129.36  
128.82  
119.45  
118.52  
117.72  
116.00  
112.75

77.37  
77.16  
76.95

51.74  
51.59  
51.44

32.89  
30.93

21.71  
13.57

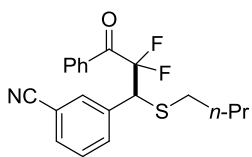

3af

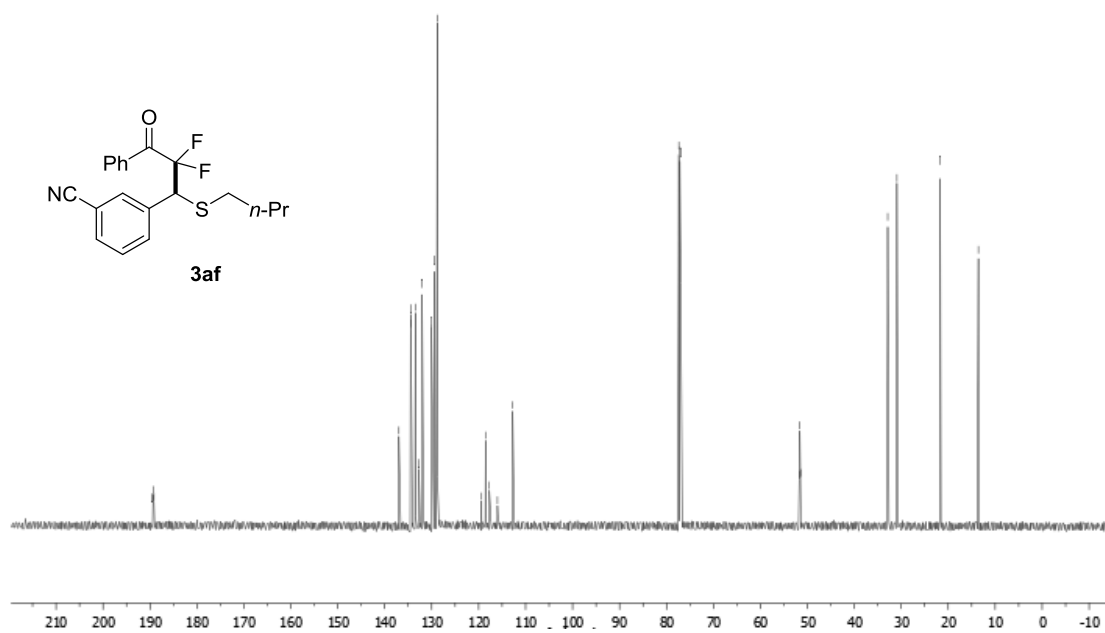

LWJ-03-Q8 (3af)

93.56  
94.05  
106.17  
106.66

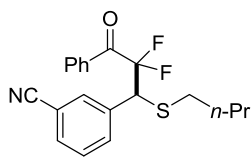

3af

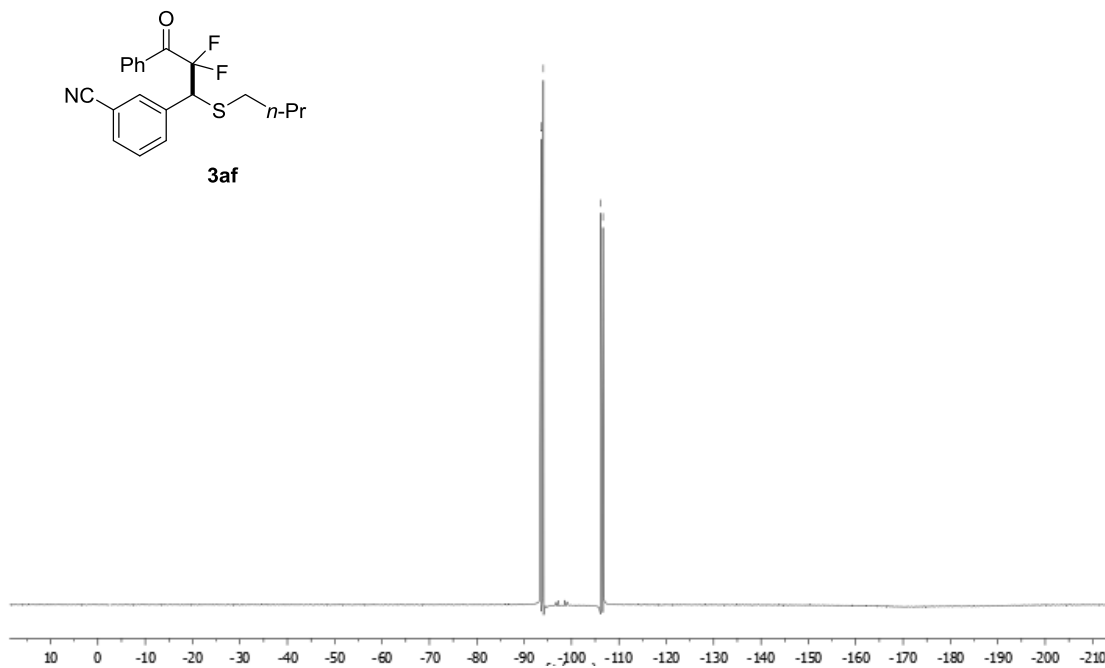

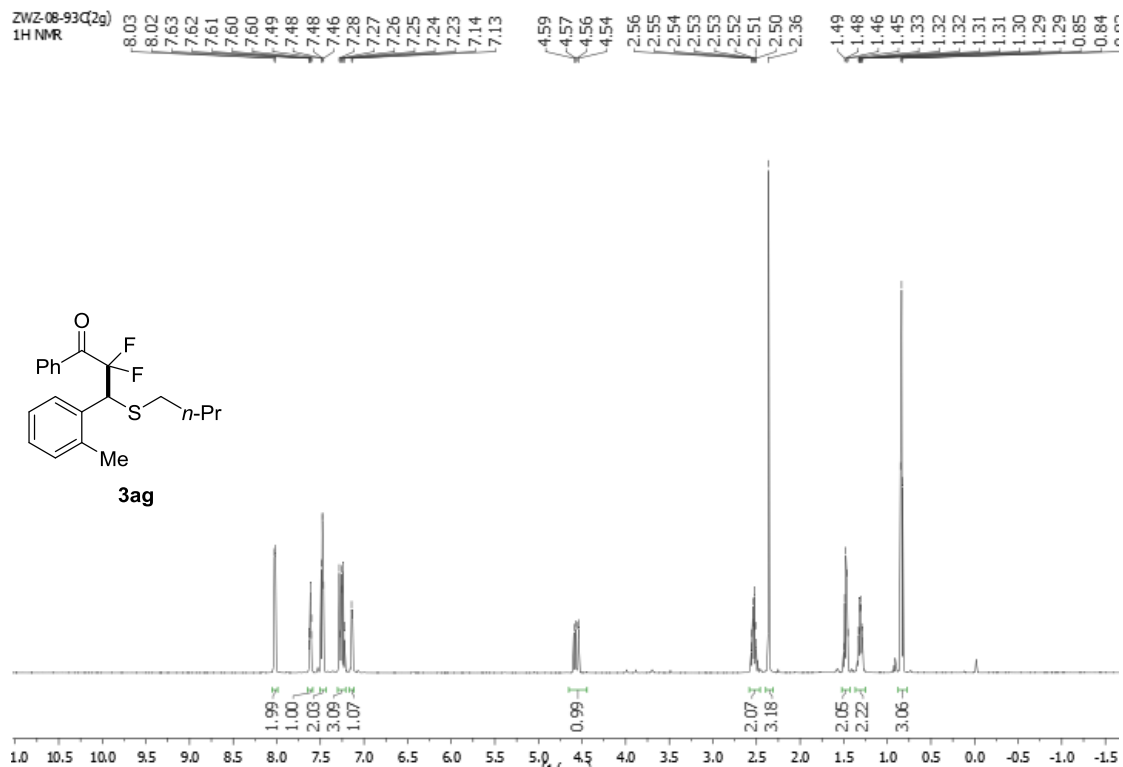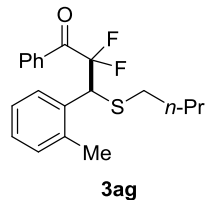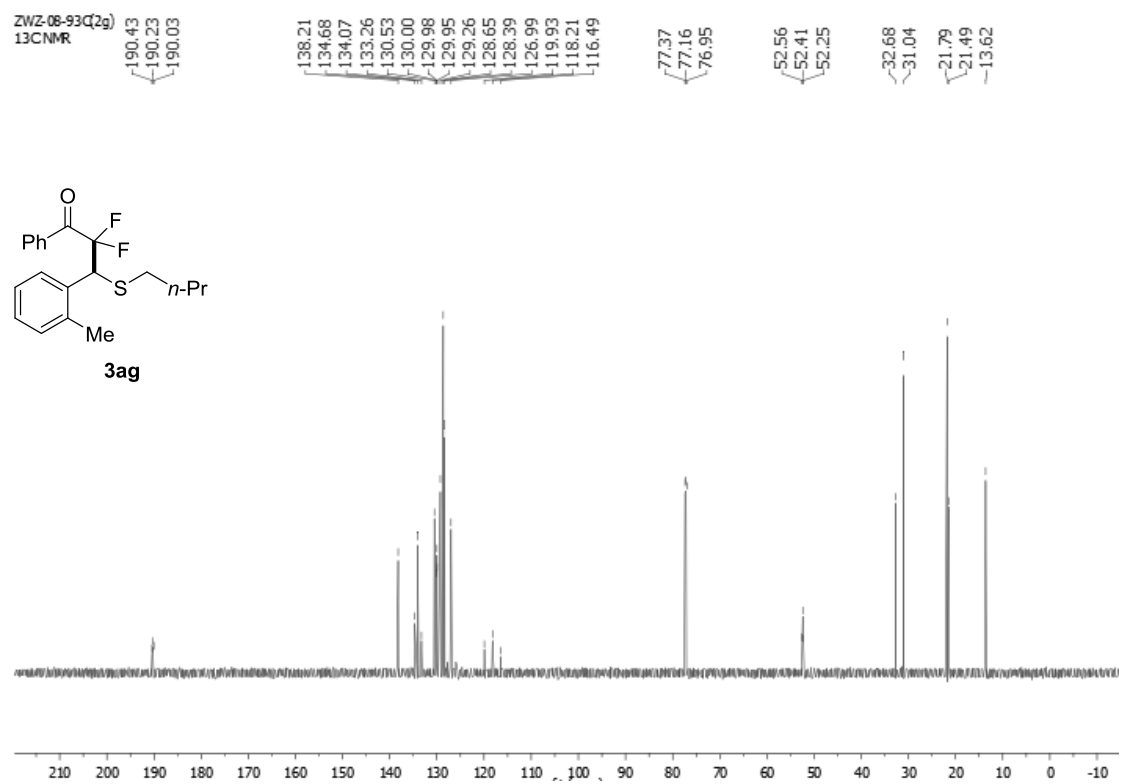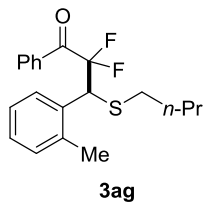

ZWZ-08-93C(2g)  
F19CPD

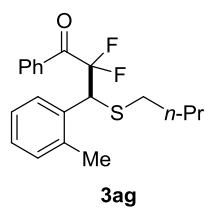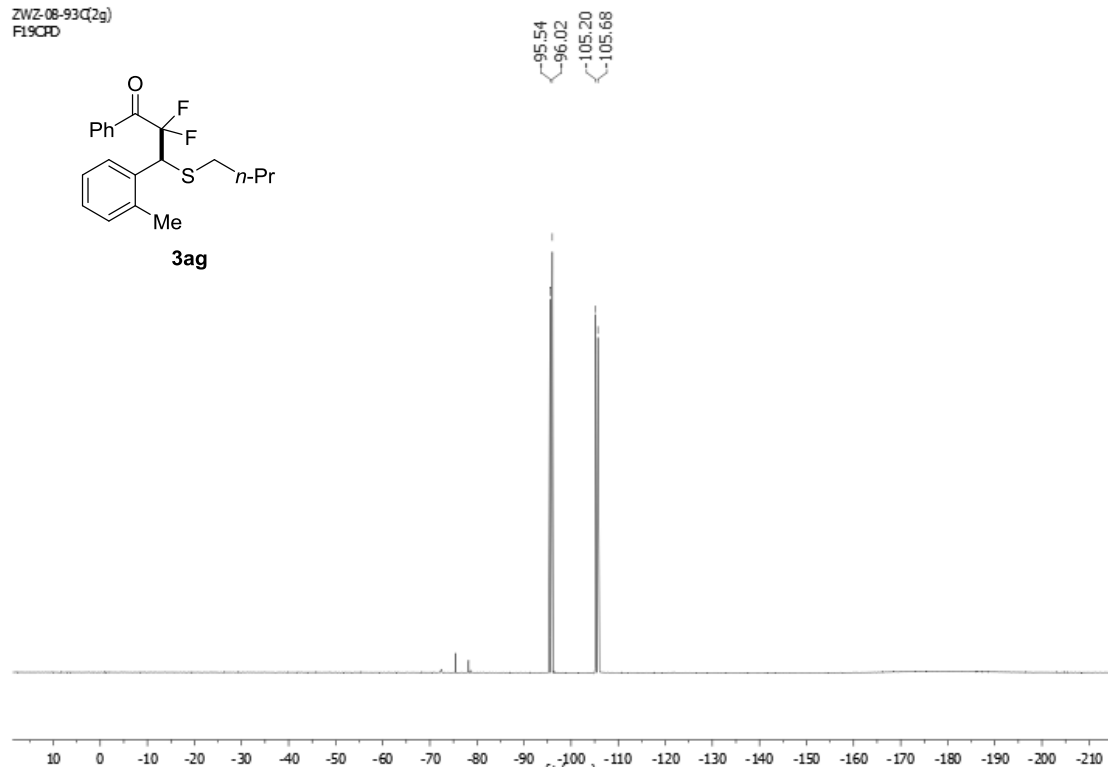

ZWZ-08-83B-1(2h)  
1H NMR

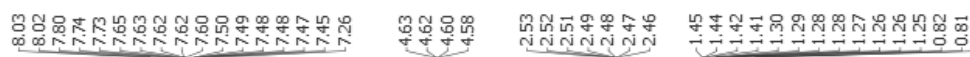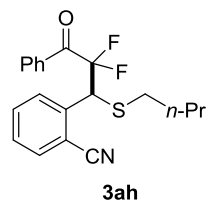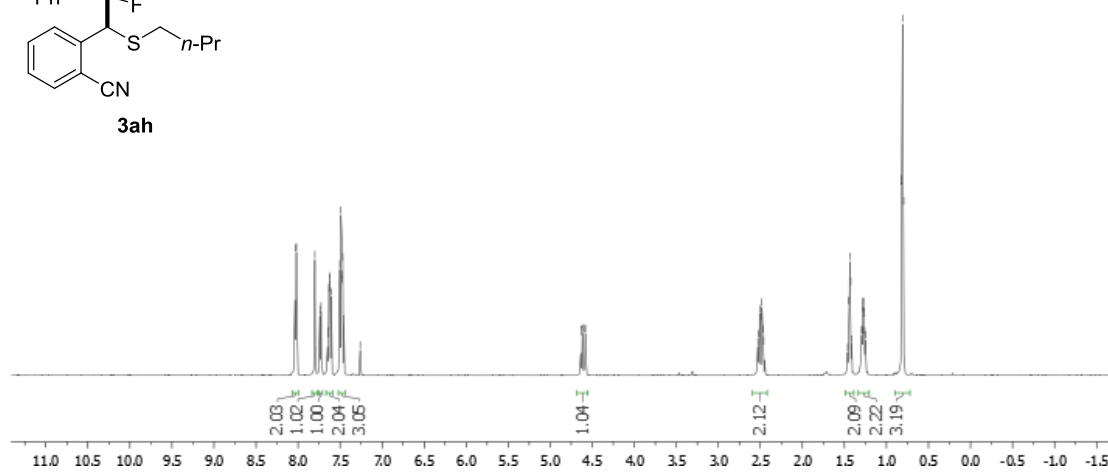

ZWZ-08-83B-1(2h)  
13CNMR

- 189.51
- 189.32
- 189.12
- 136.97
- 134.47
- 134.41
- 133.48
- 132.72
- 132.01
- 130.04
- 130.02
- 130.01
- 129.99
- 129.35
- 128.80
- 119.44
- 118.50
- 117.72
- 115.99
- 112.74
- 77.37
- 77.16
- 76.95
- 51.73
- 51.58
- 51.43
- 32.85
- 30.91
- 21.67
- 13.53

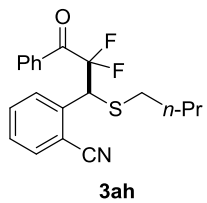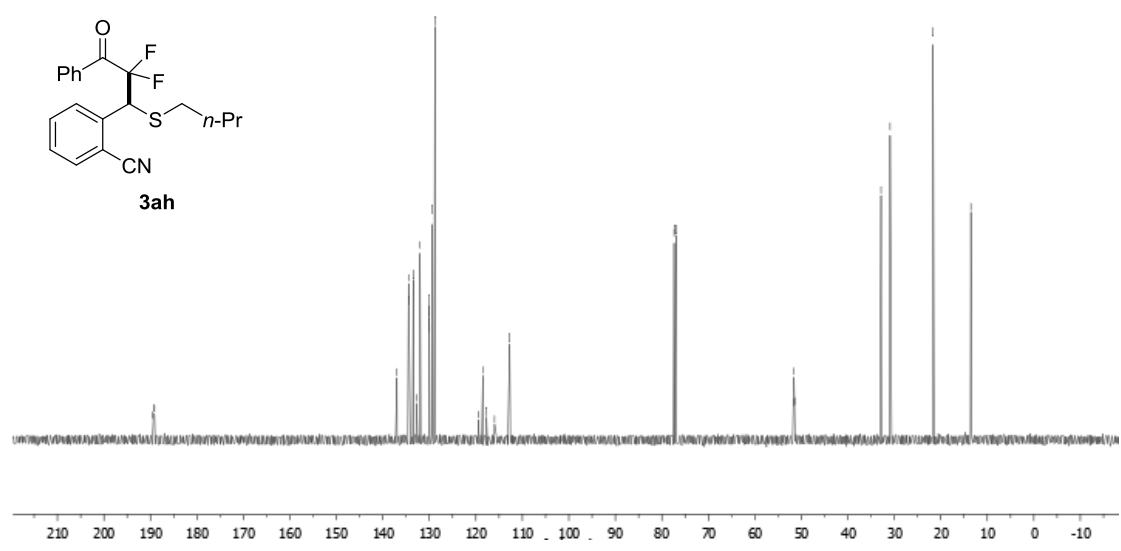

ZWZ-08-83B-1(2h)  
F19CPD

- 93.53
- 94.02
- 106.16
- 106.65

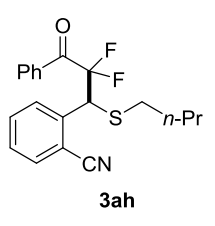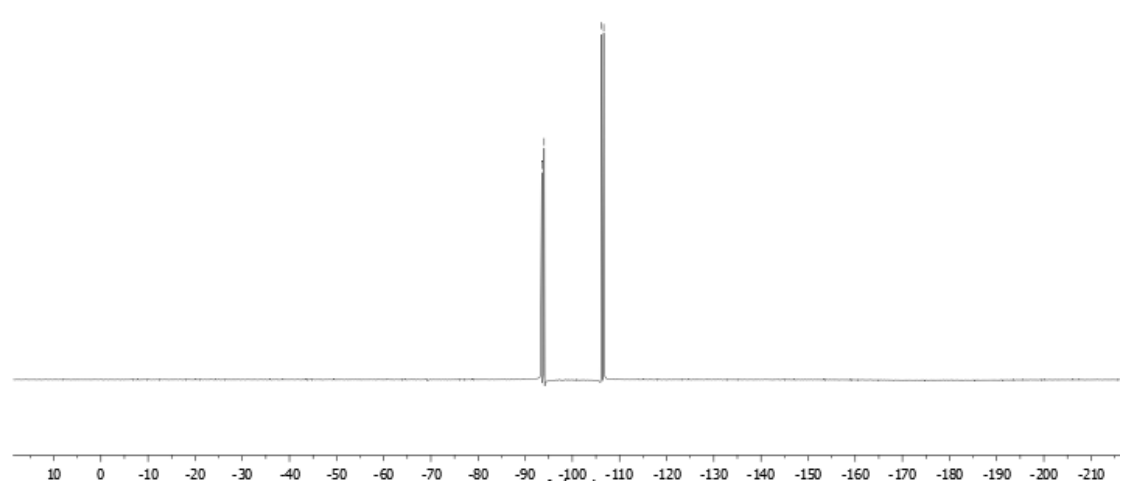

ZWZ-08-50A(2i)  
1H NMR

8.01  
7.99  
7.63  
7.61  
7.60  
7.48  
7.47  
7.46  
7.44  
7.36  
7.35  
7.34  
7.33  
7.33  
7.32  
7.31  
7.30  
7.26  
4.59  
4.57  
4.55  
4.53  
-2.09

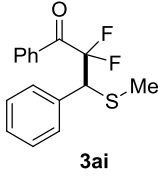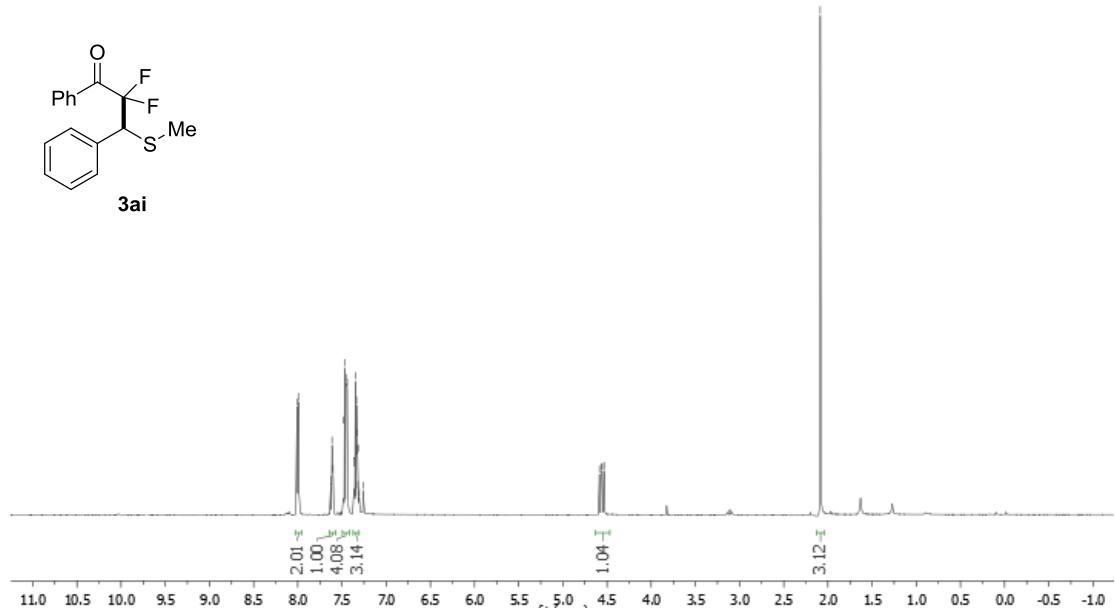

ZWZ-08-50A(2i)  
13C NMR

189.95  
189.75  
134.22  
134.13  
133.05  
130.04  
130.02  
130.00  
129.87  
129.86  
128.72  
128.63  
128.53  
120.14  
118.42  
116.70  
77.37  
77.16  
76.95  
54.05  
53.90  
53.75  
-15.99

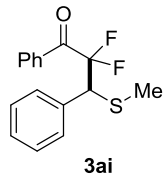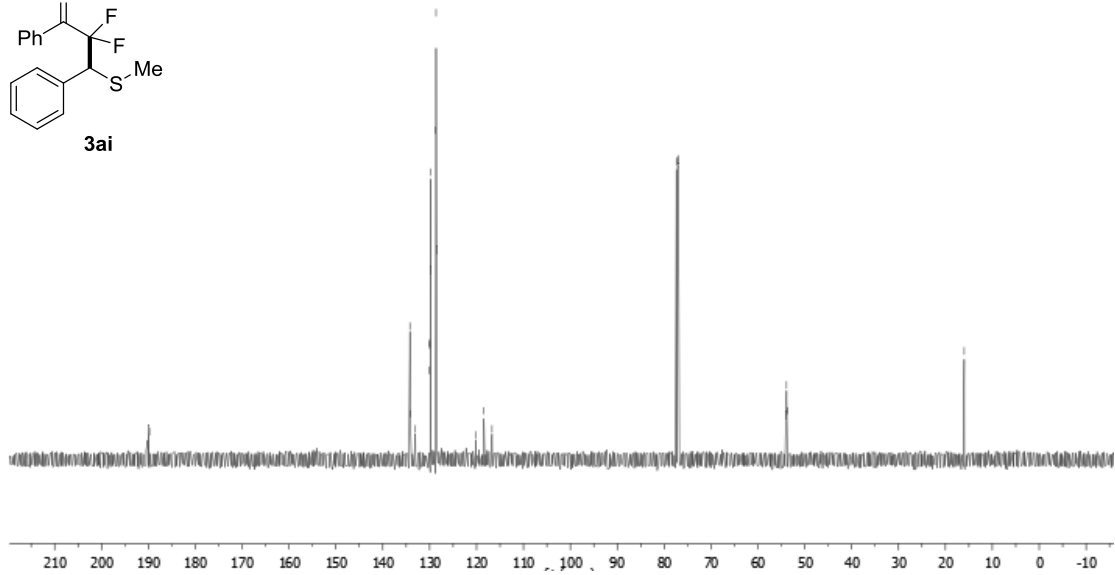

ZWZ-08-50A(2)  
F19CPD

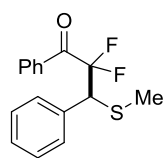

96.55  
97.03  
104.04  
104.53

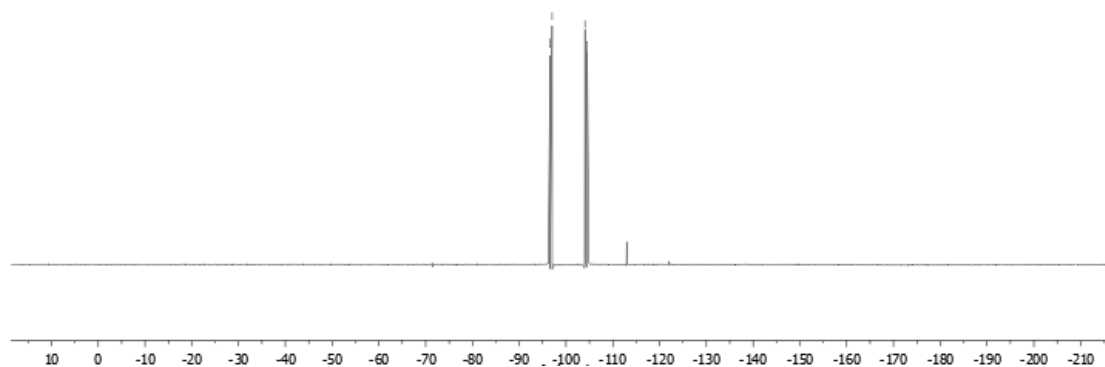

ZWZ-08-50H-1(2)  
1H NMR

8.00  
7.99  
7.62  
7.61  
7.60  
7.48  
7.47  
7.47  
7.46  
7.46  
7.36  
7.35  
7.35  
7.34  
7.33  
7.32  
7.31  
7.31  
7.30  
7.30  
7.26  
4.65  
4.63  
4.61  
4.59  
2.90  
2.89  
2.88  
2.87  
2.86  
1.19  
1.18  
1.17  
1.16

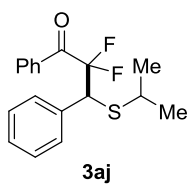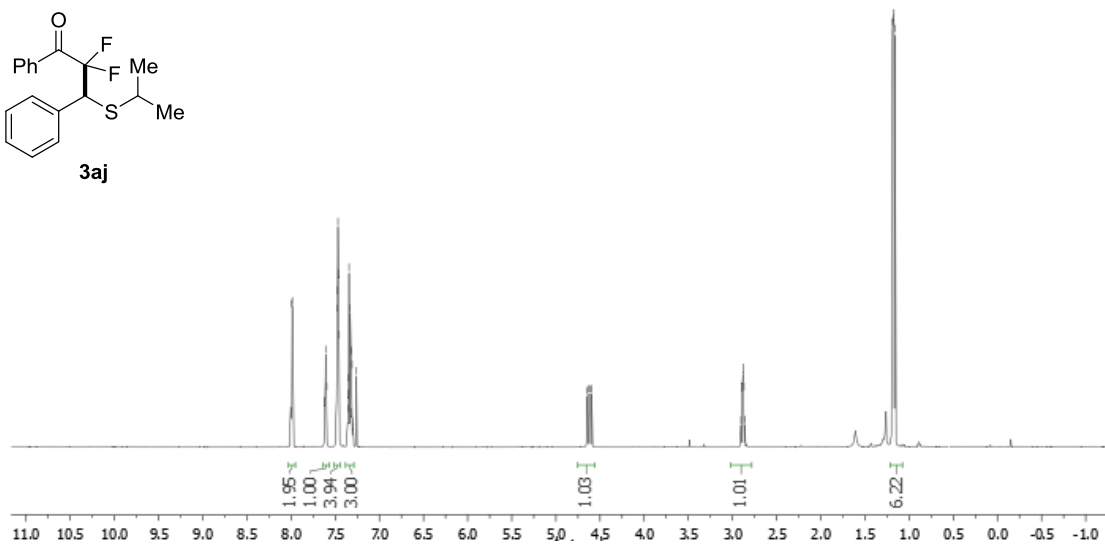



ZWZ-08-50H-1(2)  
13CNMR

135.41  
134.09  
133.40  
130.05  
130.04  
130.02  
130.01  
128.69  
128.57  
128.45  
119.83  
118.10  
116.39  
77.37  
77.16  
76.95  
51.60  
51.45  
51.30  
-36.70  
23.40  
23.01

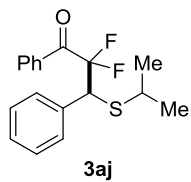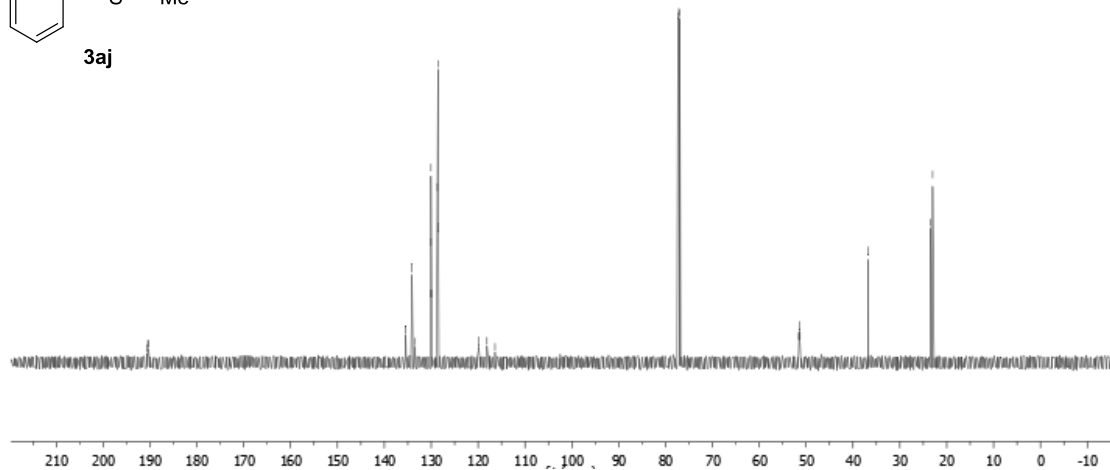

ZWZ-08-50H-1(2)  
F19CPD

95.08  
95.56  
105.60  
106.08

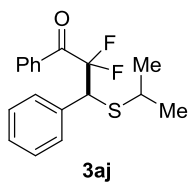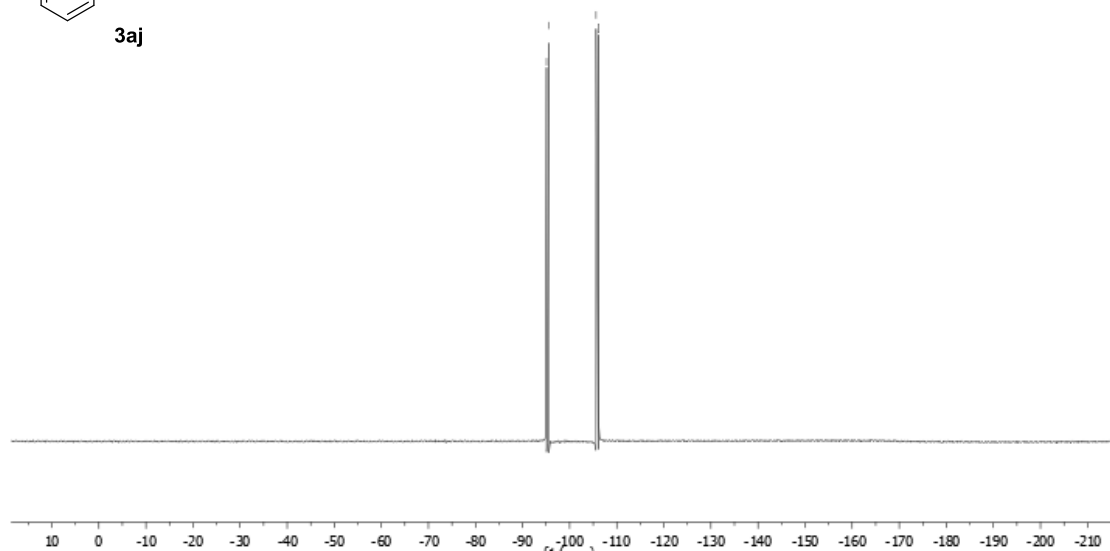

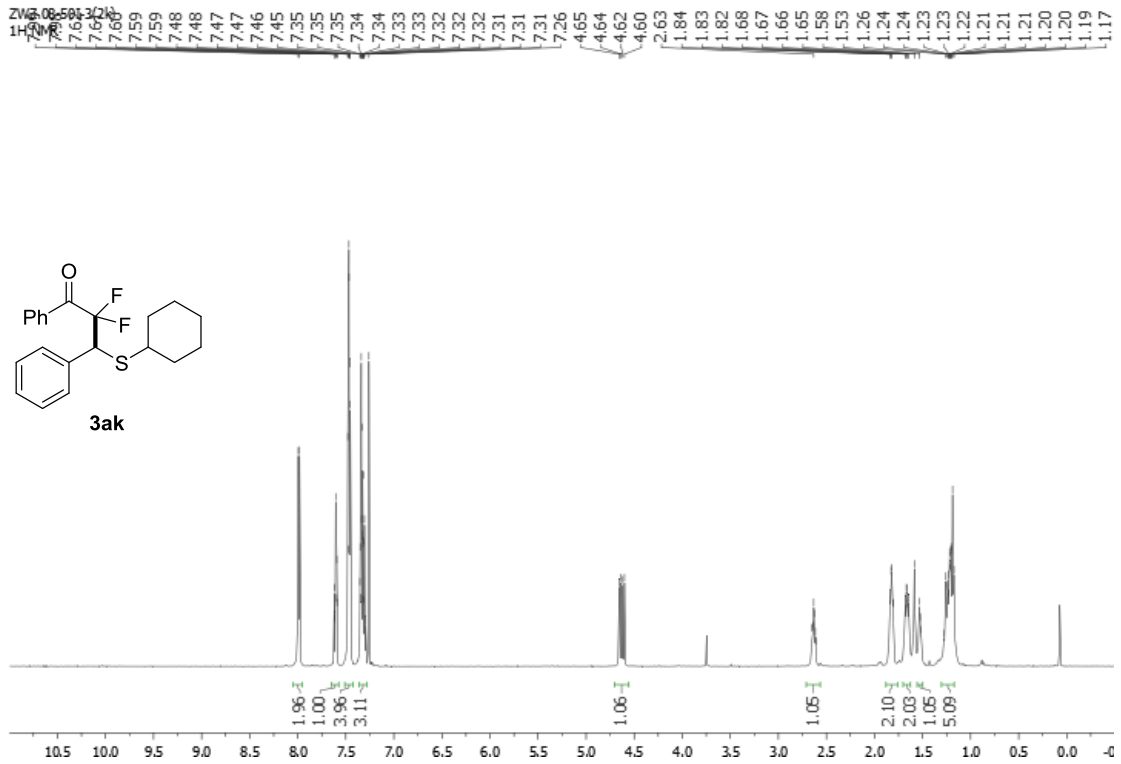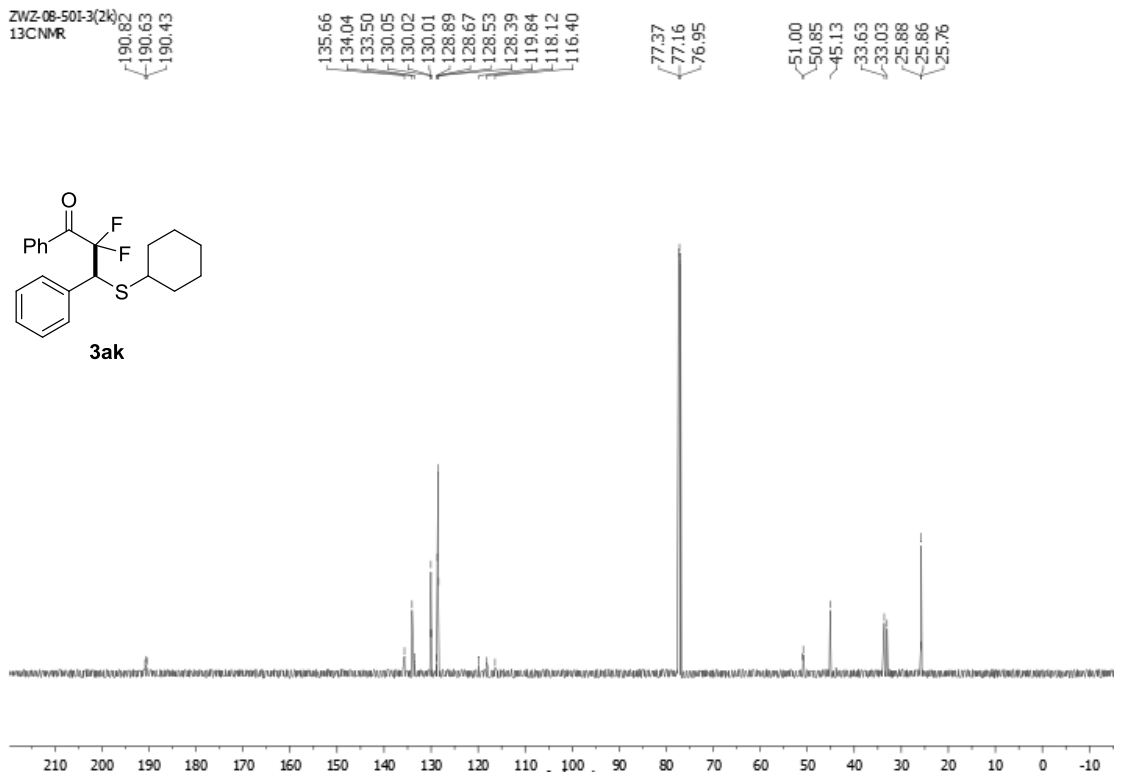

ZWZ-08-501-3(2k)  
F19CPD

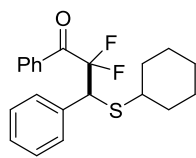

**3ak**

94.59  
95.07  
106.09  
106.57

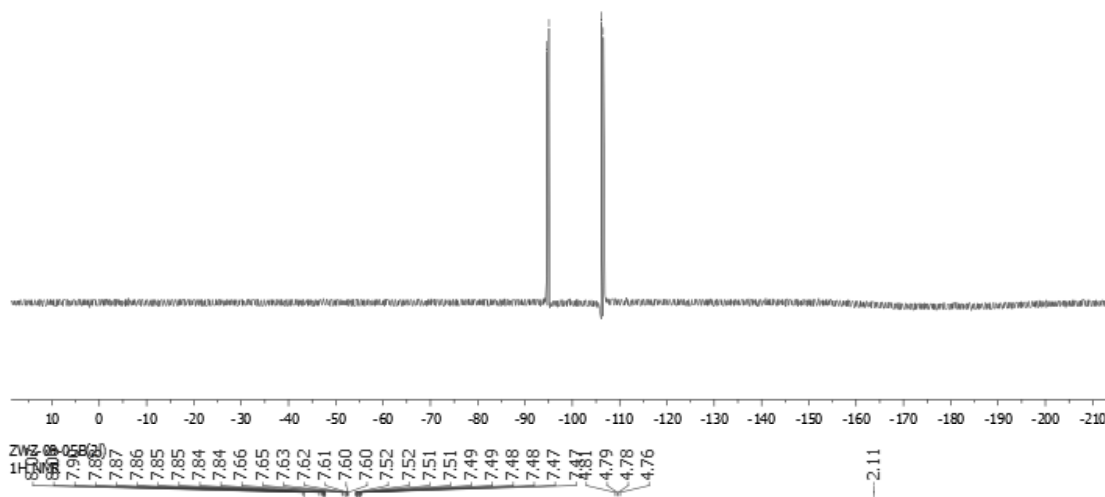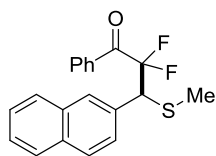

**3al**

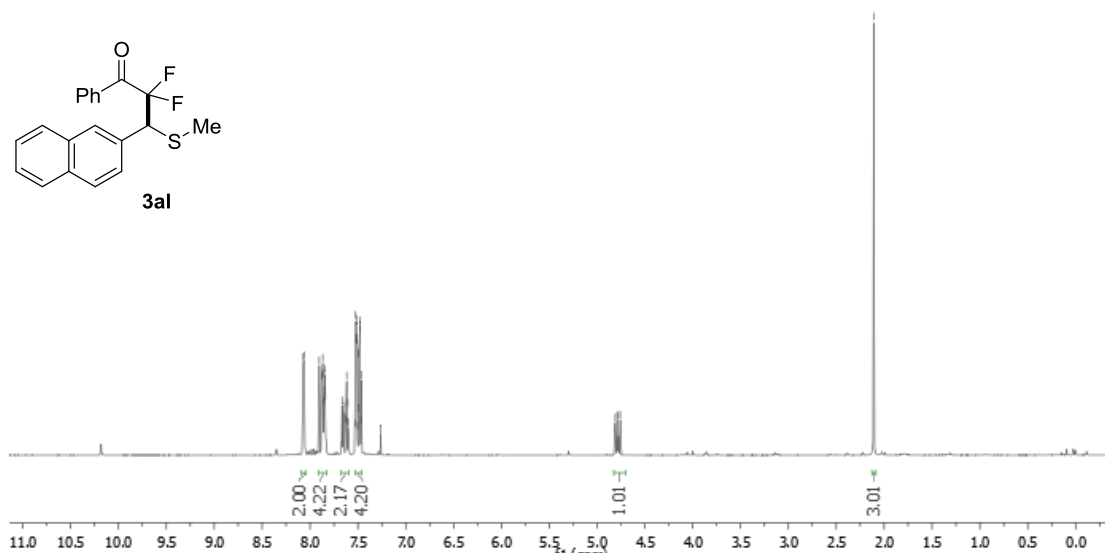

ZWZ-09-05B(2)  
13CNMR

189.98  
189.78  
189.58

134.24  
133.18  
133.01  
132.94  
131.43  
130.05  
130.03  
130.00  
129.26  
128.72  
128.56  
128.13  
127.73  
127.12  
126.60  
126.47  
120.23  
118.51  
116.79  
77.37  
77.16  
76.95

54.15  
54.00  
53.84

15.84

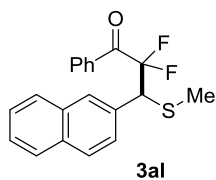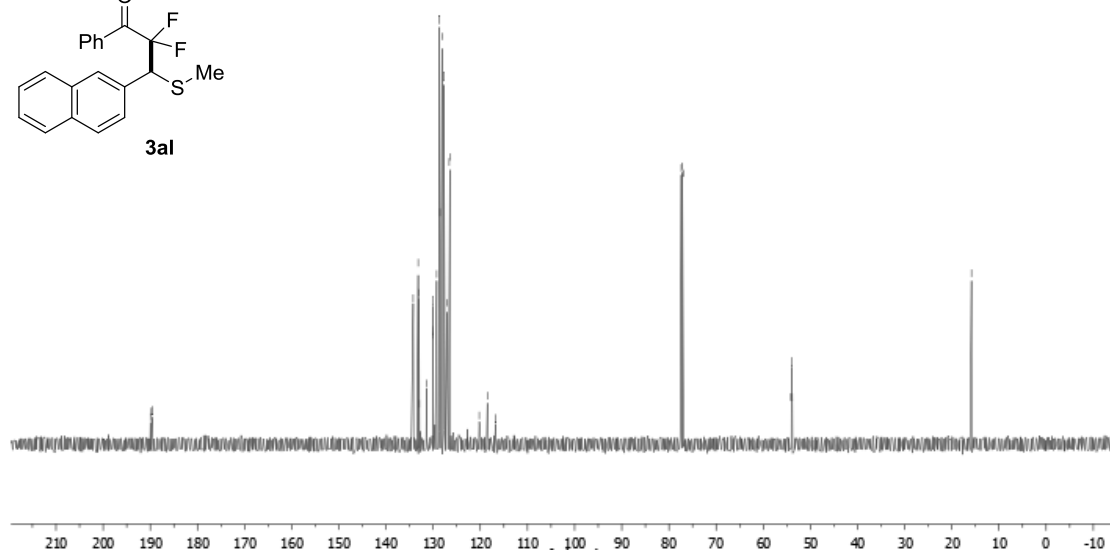

ZWZ-09-05B-F  
F19CPD

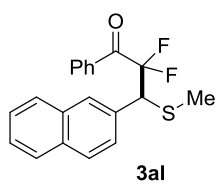

95.81  
96.29  
103.78  
104.27

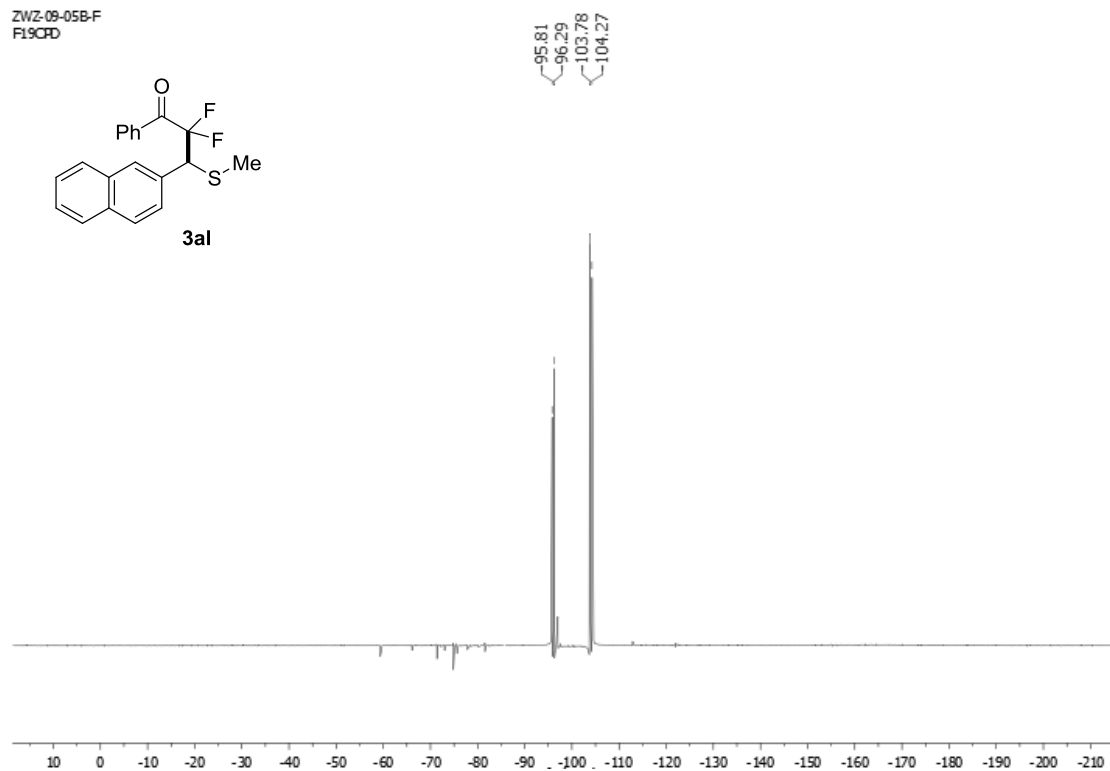

ZWZ-09-11-2(2m)  
1H NMR

8.04  
8.02  
7.64  
7.64  
7.63  
7.62  
7.50  
7.49  
7.48  
7.32  
7.32  
7.31  
7.31  
7.26  
7.13  
7.13  
6.98  
6.98  
6.97  
4.92  
4.90  
4.89  
4.87

--2.13

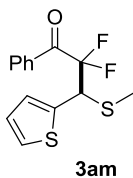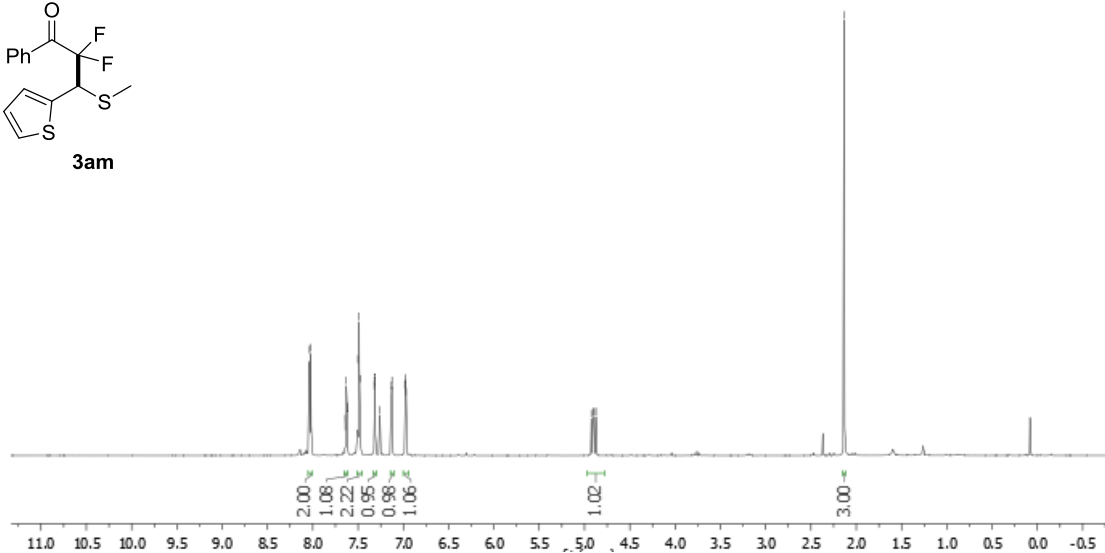

ZWZ-09-11-2(2m)  
13C NMR

189.76  
189.56  
189.37

136.32  
136.31  
134.35  
132.91  
130.04  
130.02  
129.99  
128.81  
128.70  
126.92  
126.74  
119.54  
117.82  
116.09

77.37  
77.16  
76.95

48.92  
48.76  
48.60

15.67  
15.66

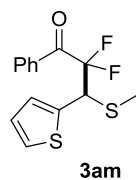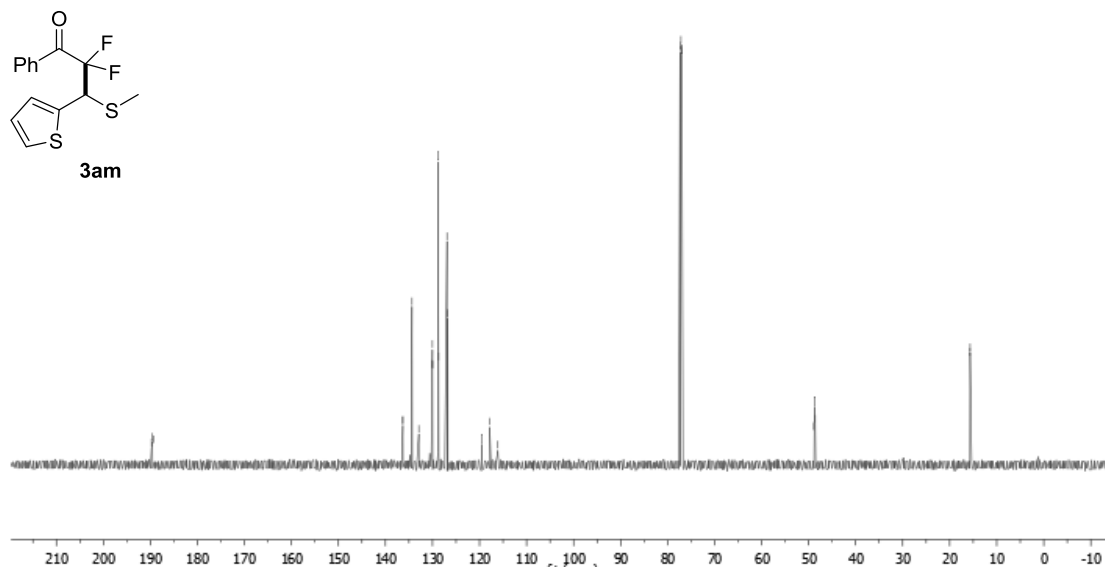

ZWZ-09-11-2-F  
F19CPD

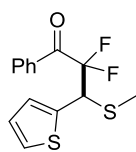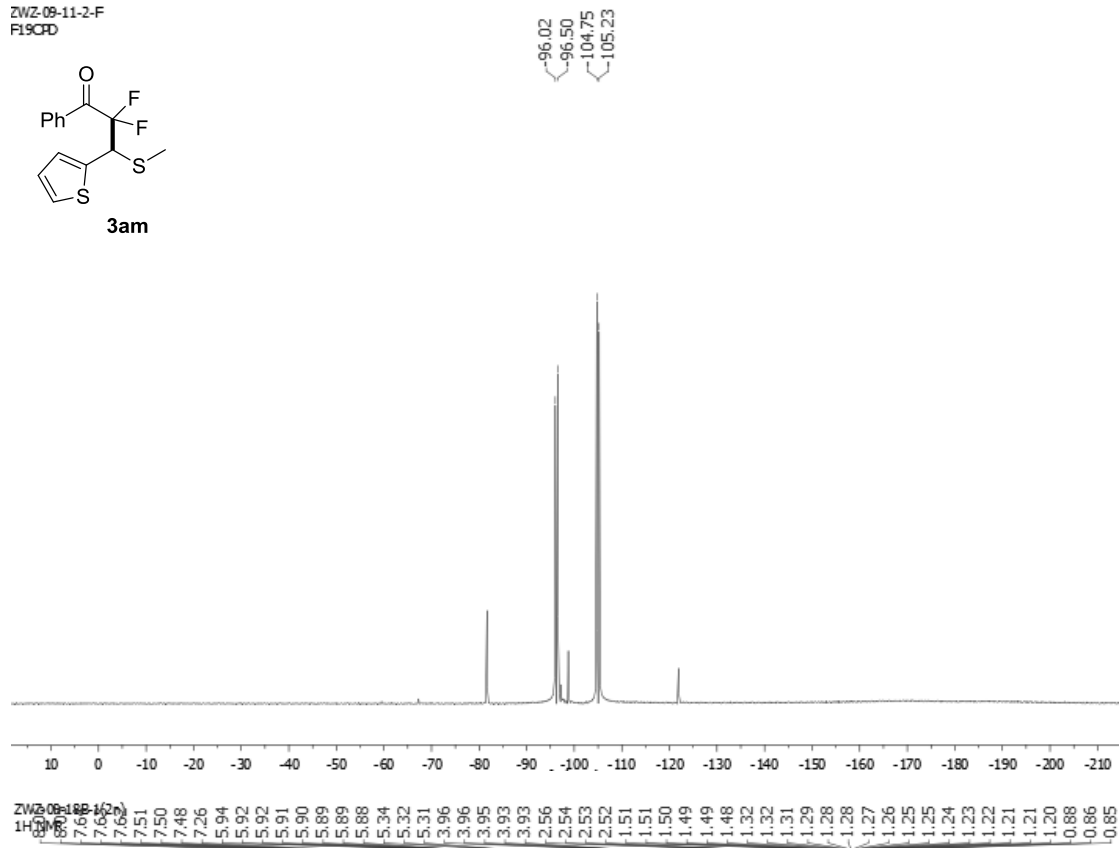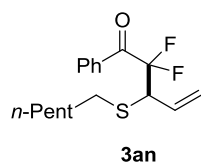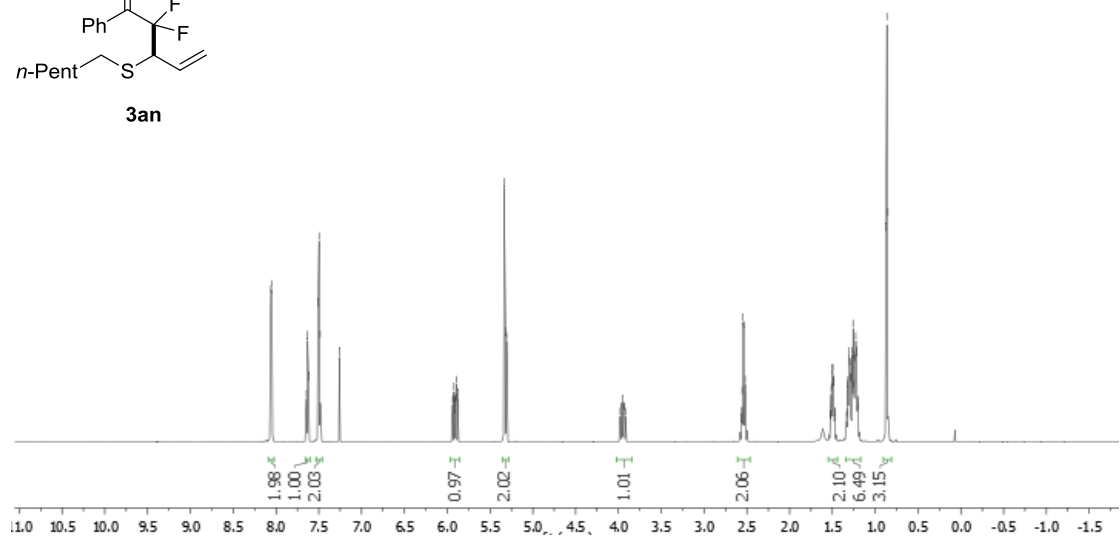

ZWZ-09-18B-1(2n)  
13CNMR

134.26  
133.10  
130.59  
130.58  
130.56  
130.08  
130.06  
130.03  
128.79  
120.46  
119.86  
118.15  
116.43

77.37  
77.16  
76.95

51.44  
51.29  
51.13

31.77  
31.44  
29.11  
28.49  
22.61  
14.13

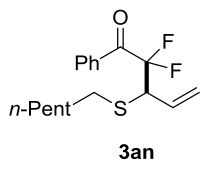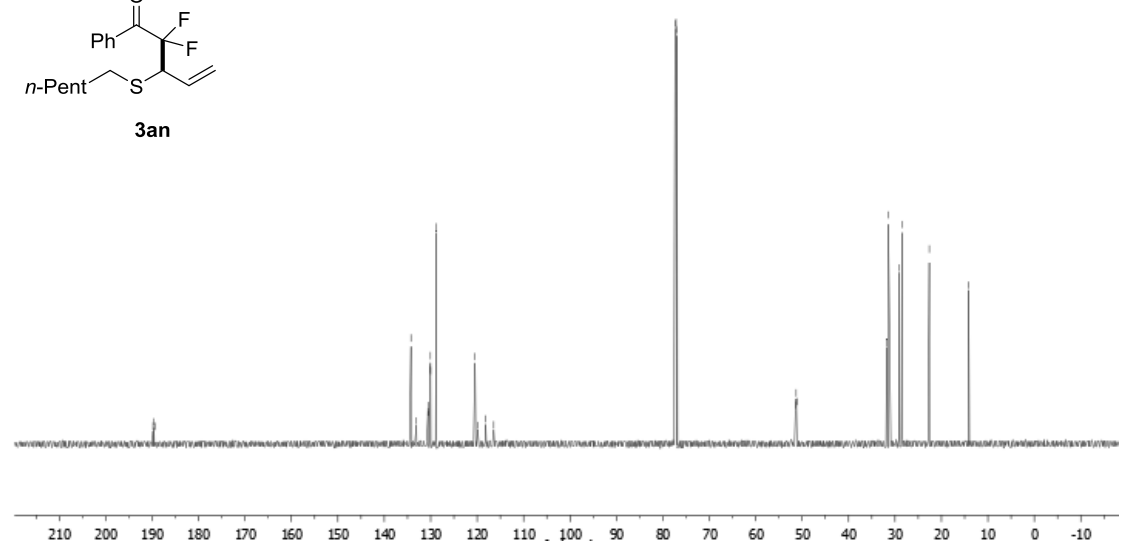

ZWZ-09-18B-1-F  
F19CPD

96.60  
97.09  
106.36  
106.84

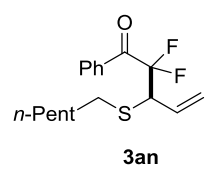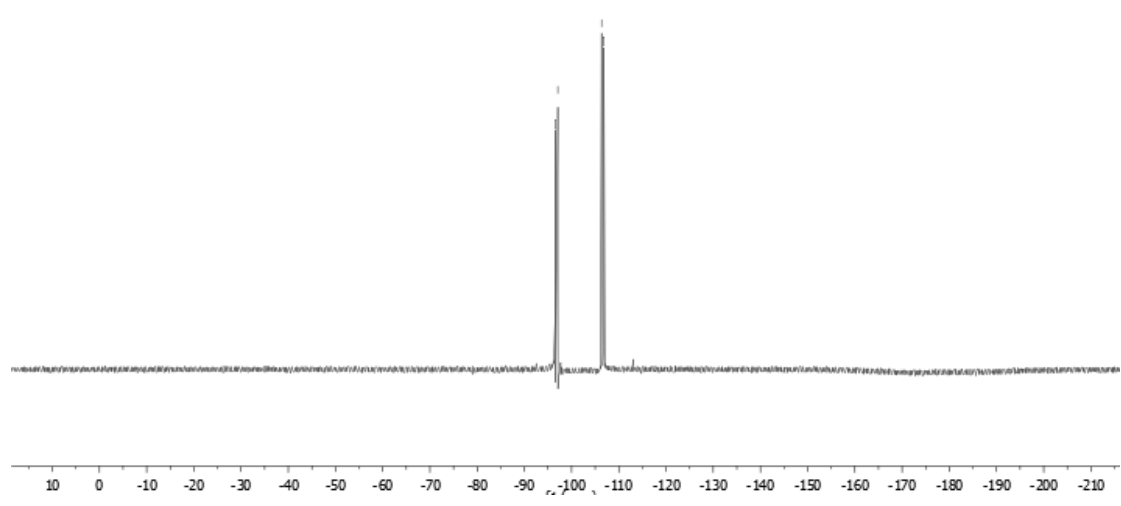

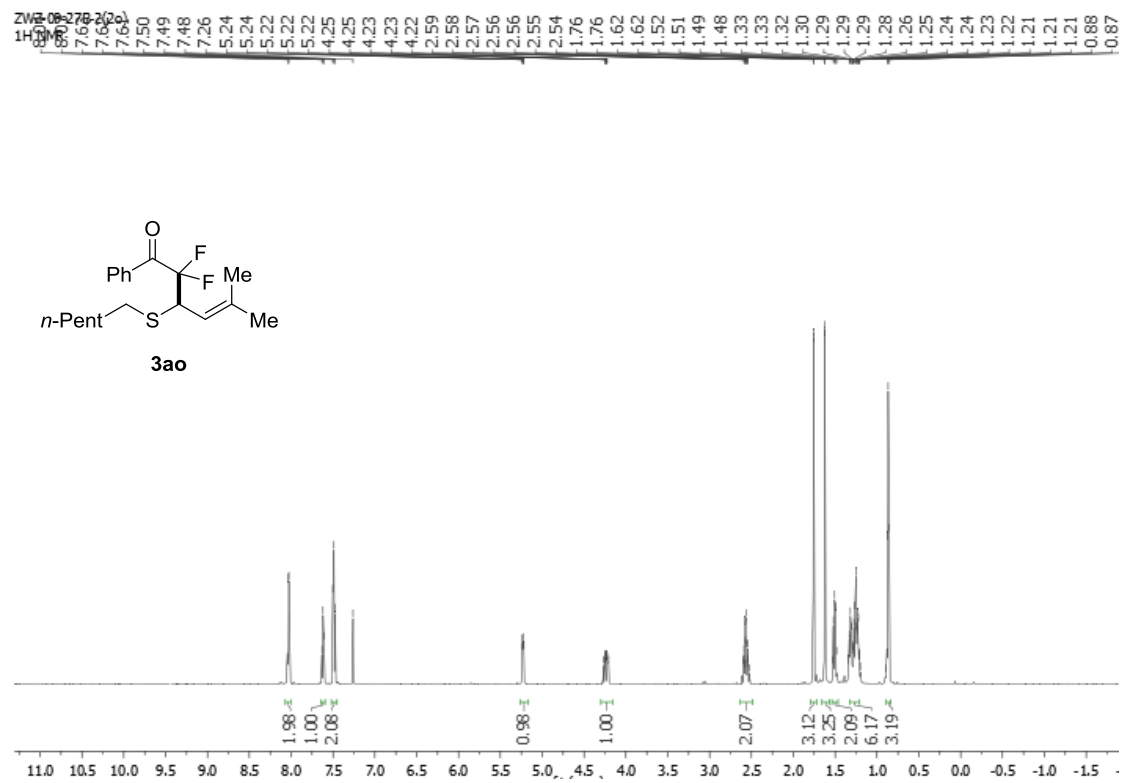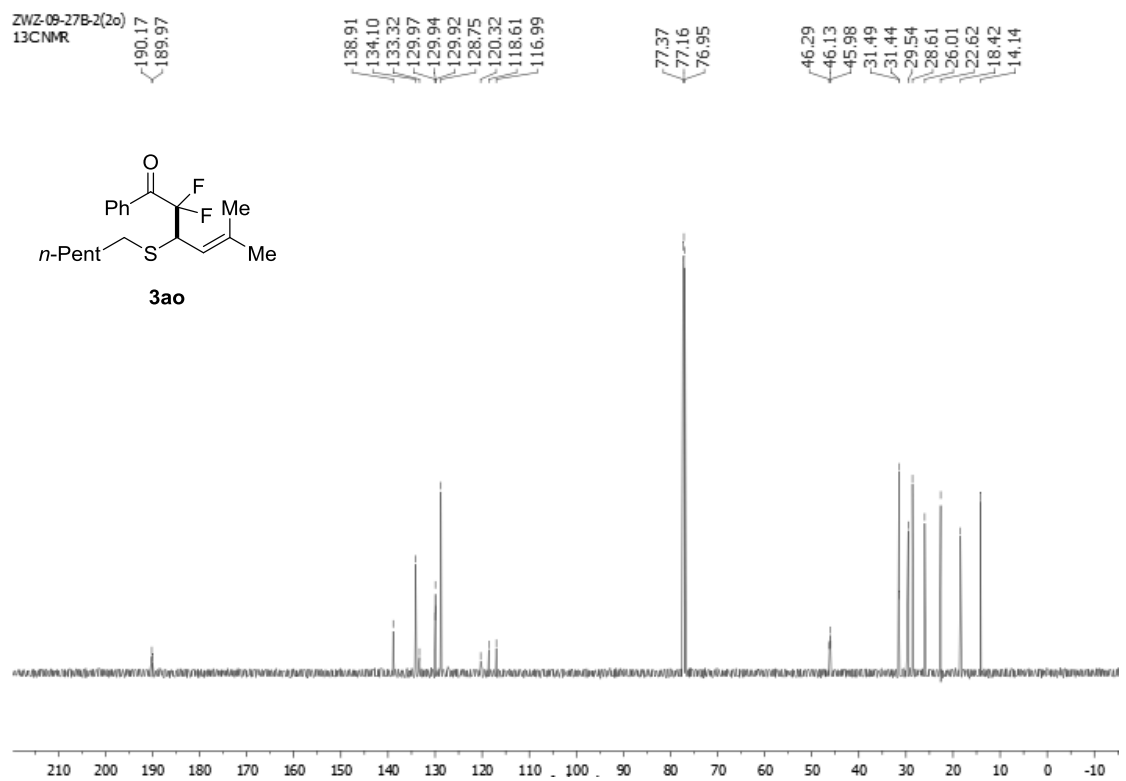



ZWZ-09-27B-2-F  
F19CRD

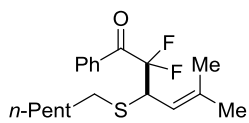

**3ao**

99.92  
100.39  
104.68  
105.15  
105.16

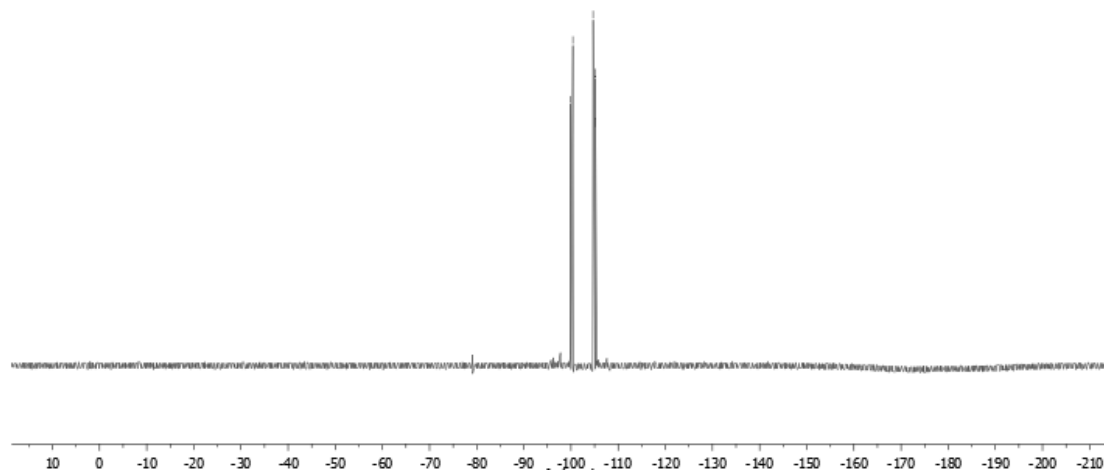

ZWZ-08-98E-2(2r)  
1H NMR

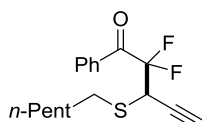

**3ap**

8.08  
8.07  
7.66  
7.65  
7.64  
7.52  
7.51  
7.49  
7.26

4.41  
4.40  
4.39  
4.38  
4.38  
4.37  
4.36  
4.35

2.81  
2.80  
2.79  
2.79  
2.55  
2.54

1.60  
1.59  
1.57  
1.38  
1.36  
1.35  
1.29  
1.28  
1.27  
1.26  
1.25  
0.88  
0.87

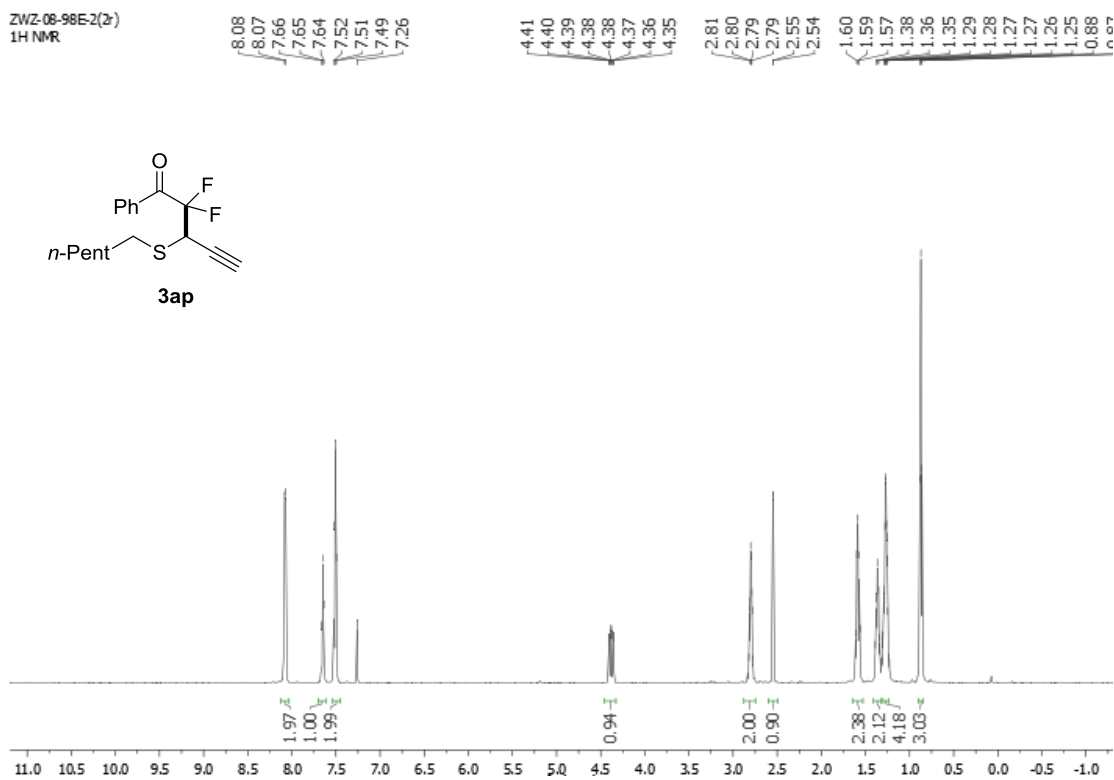

ZWZ-08-98E2(2r)  
13CNMR

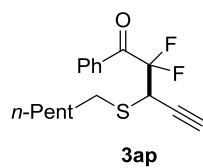

134.56  
132.57  
130.17  
130.15  
130.12  
128.86  
118.75  
117.01  
115.27

77.37  
77.16  
76.95  
76.02  
75.57

38.78  
38.60  
38.43  
31.82  
29.11  
28.56  
22.60  
14.13

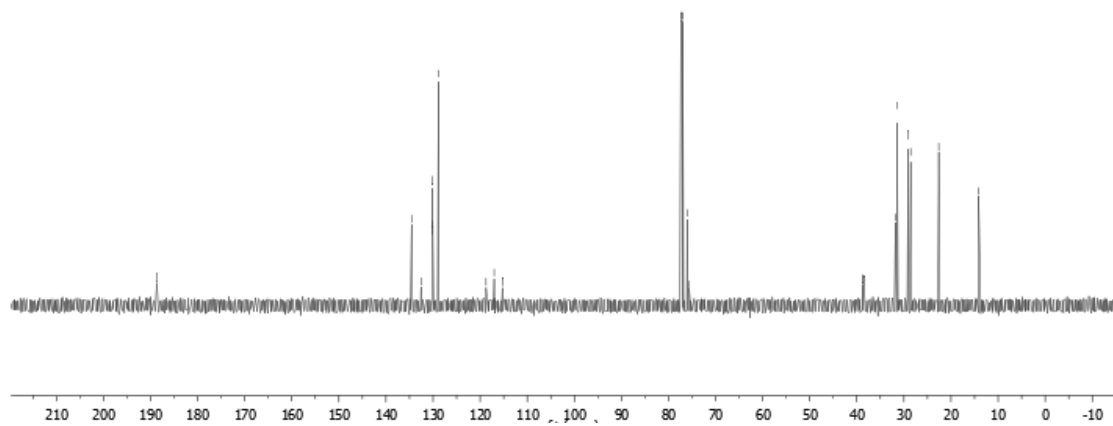

ZWZ-08-98E2-F  
F19CD

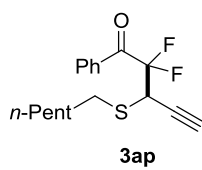

96.35  
96.83  
105.19  
105.67

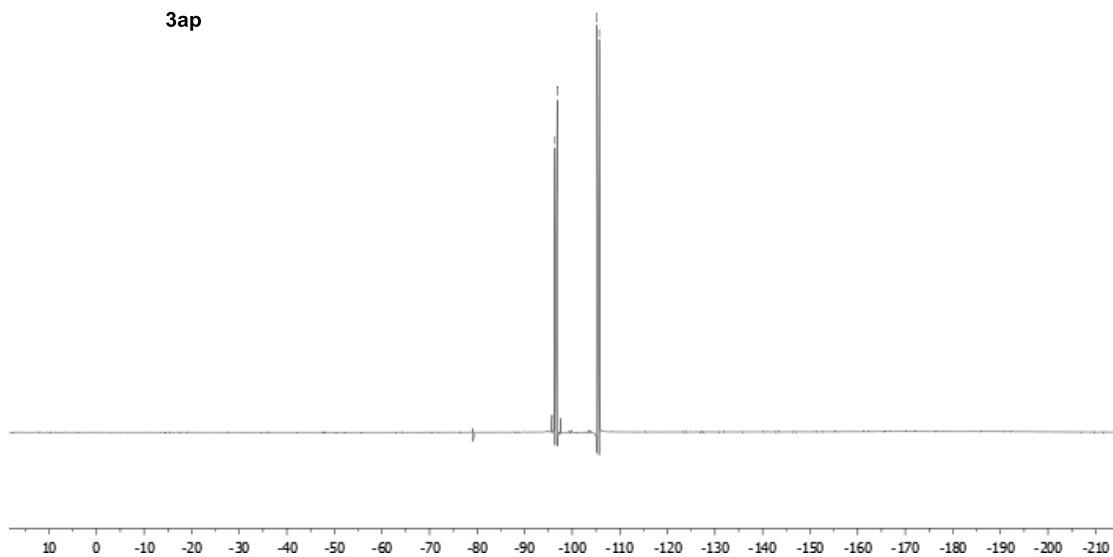

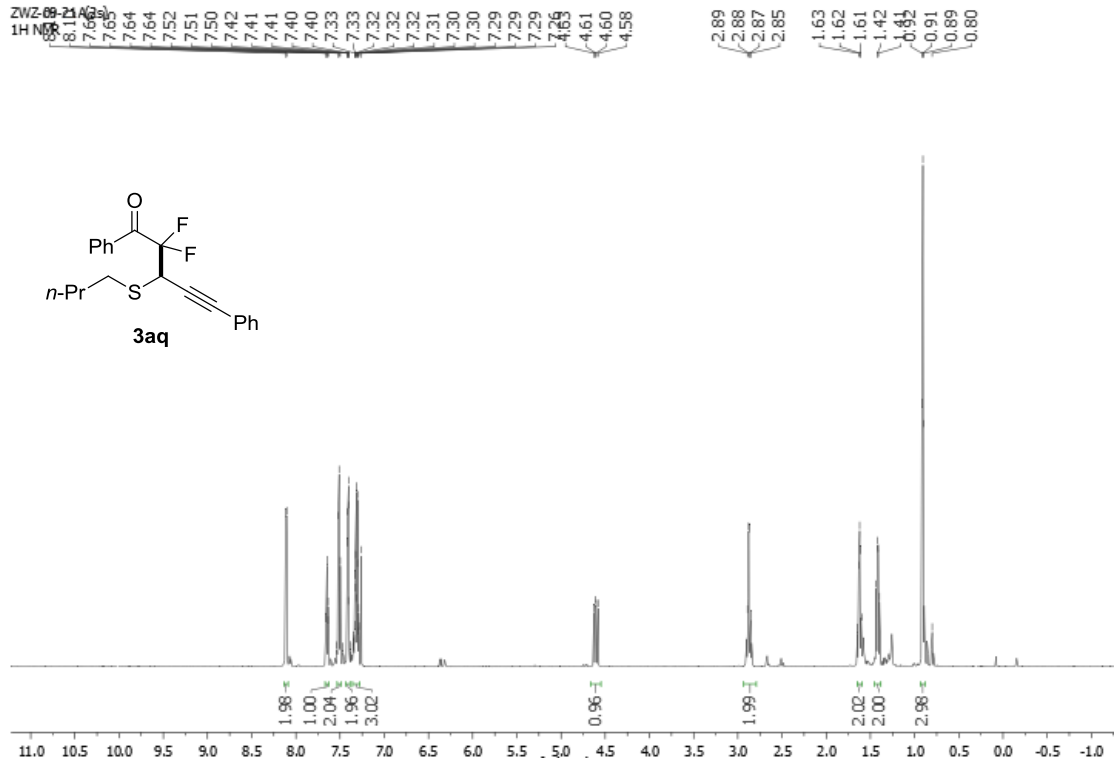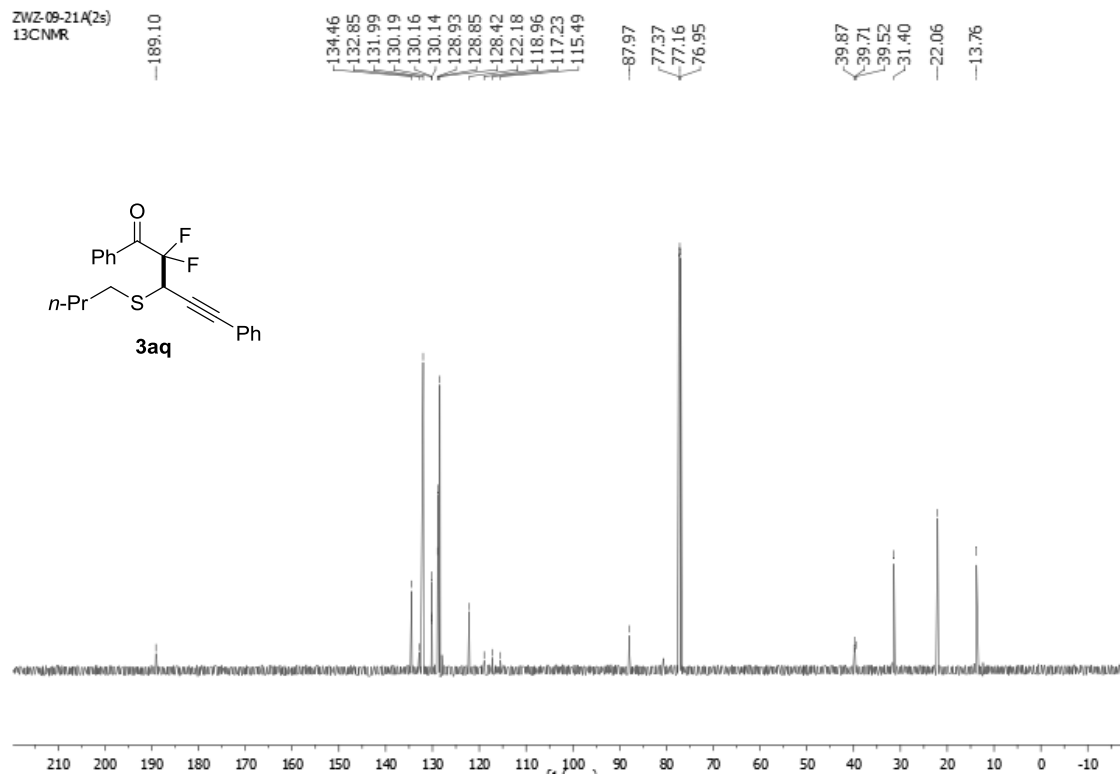

ZWZ-09-21A-F  
F19CPD

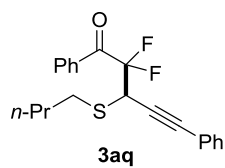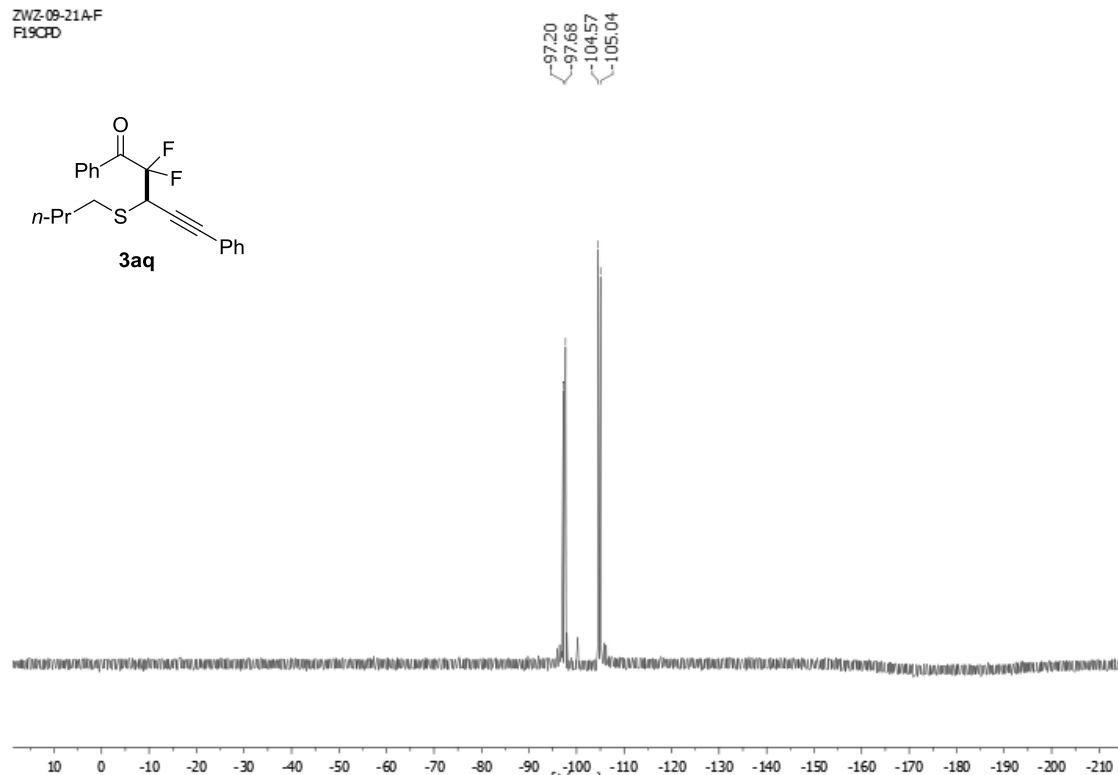

ZWZ-08-95D(2t)  
1H NMR

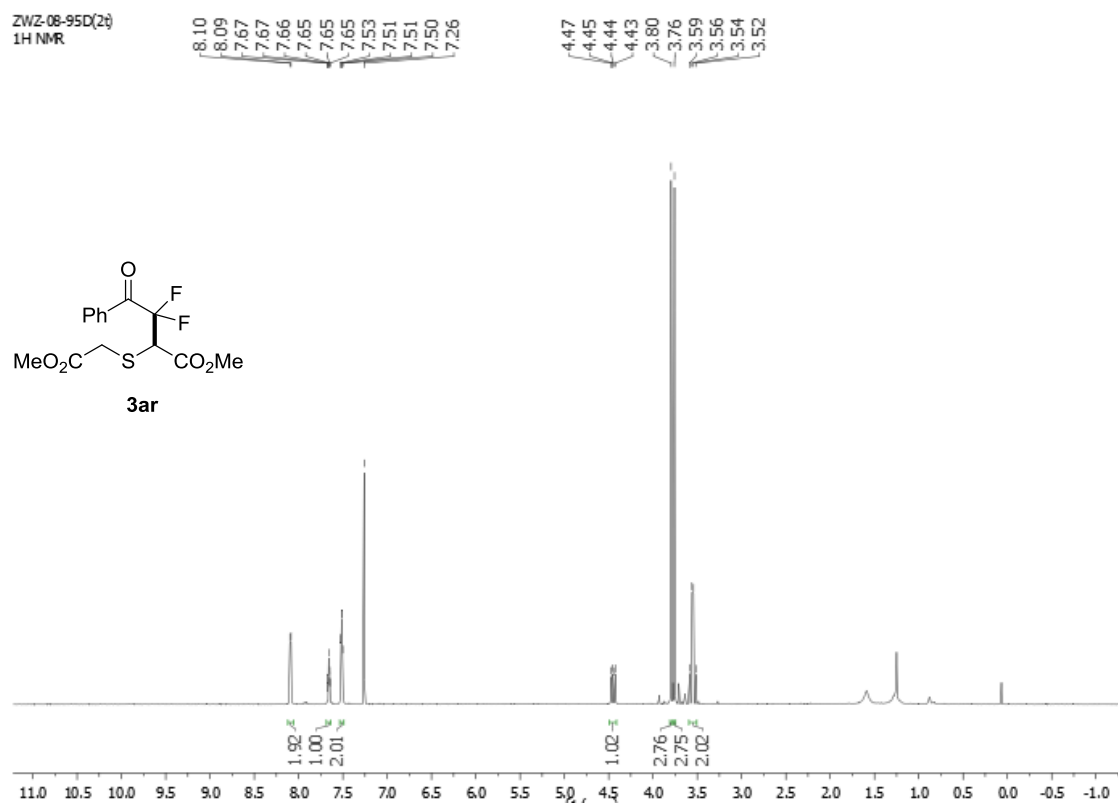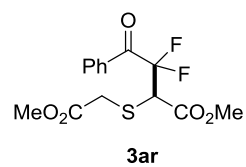

ZWZ-08-95D(2c)  
13C NMR

~169.82  
~167.49  
~134.87  
~130.37  
~128.92  
77.37  
77.16  
76.95  
-66.18  
53.20  
52.84  
-33.98

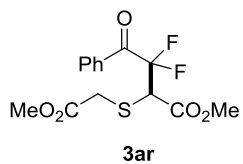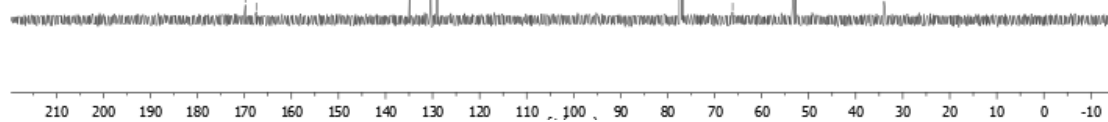

ZWZ-08-95D-F  
F19CPD

99.96  
100.49  
102.16  
102.69

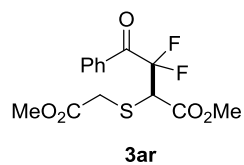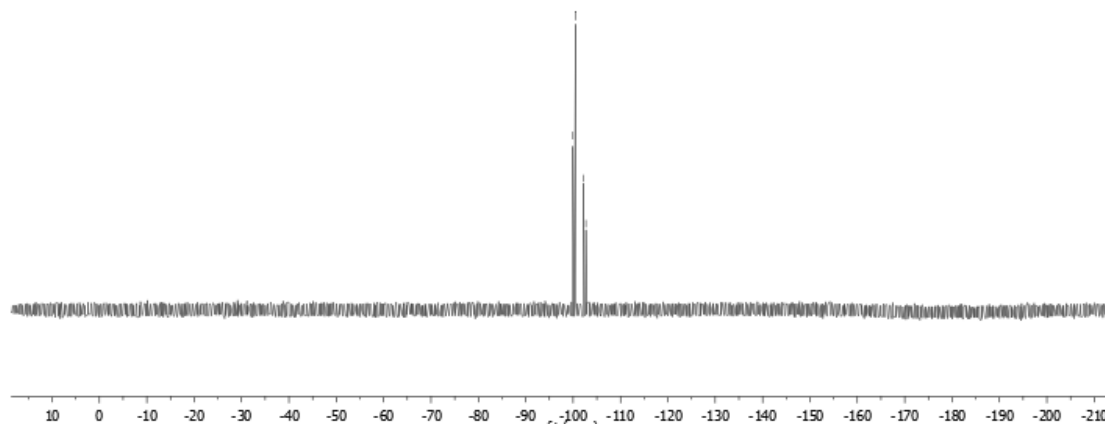

ZWZ-08-92A(2u)  
1H NMR

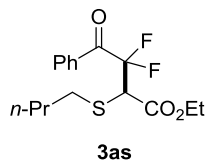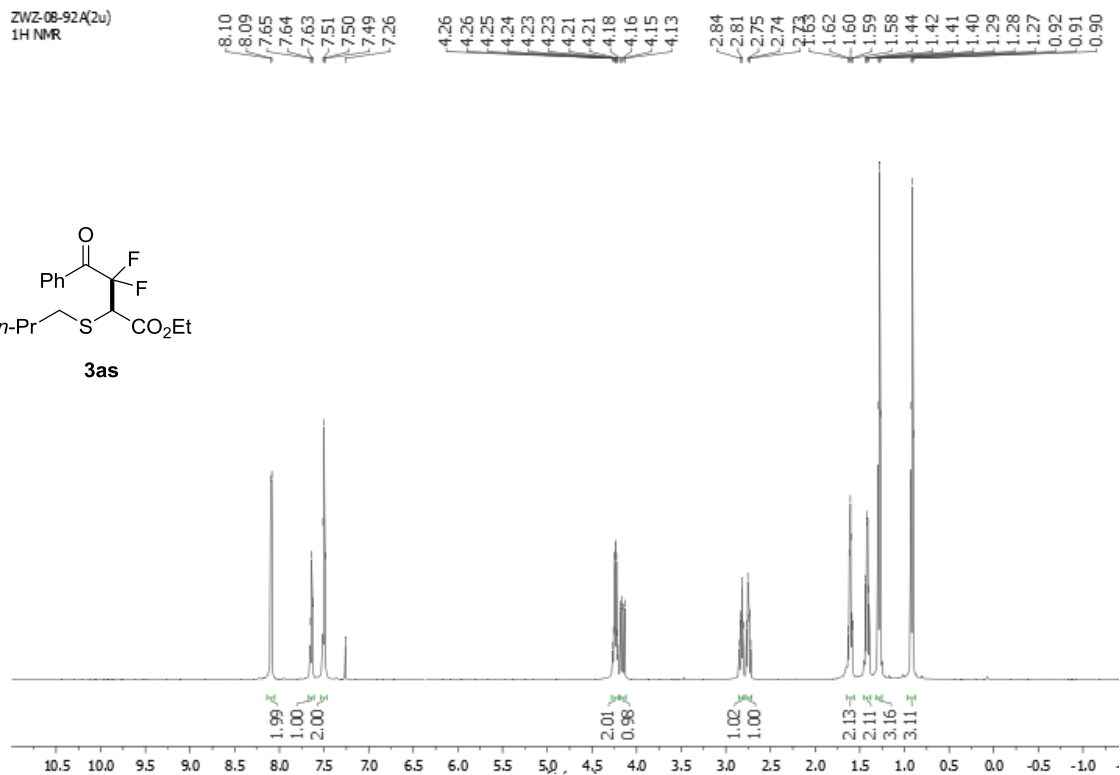

ZWZ-08-92A(2u)  
13C NMR

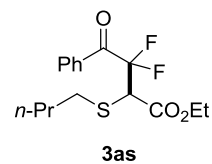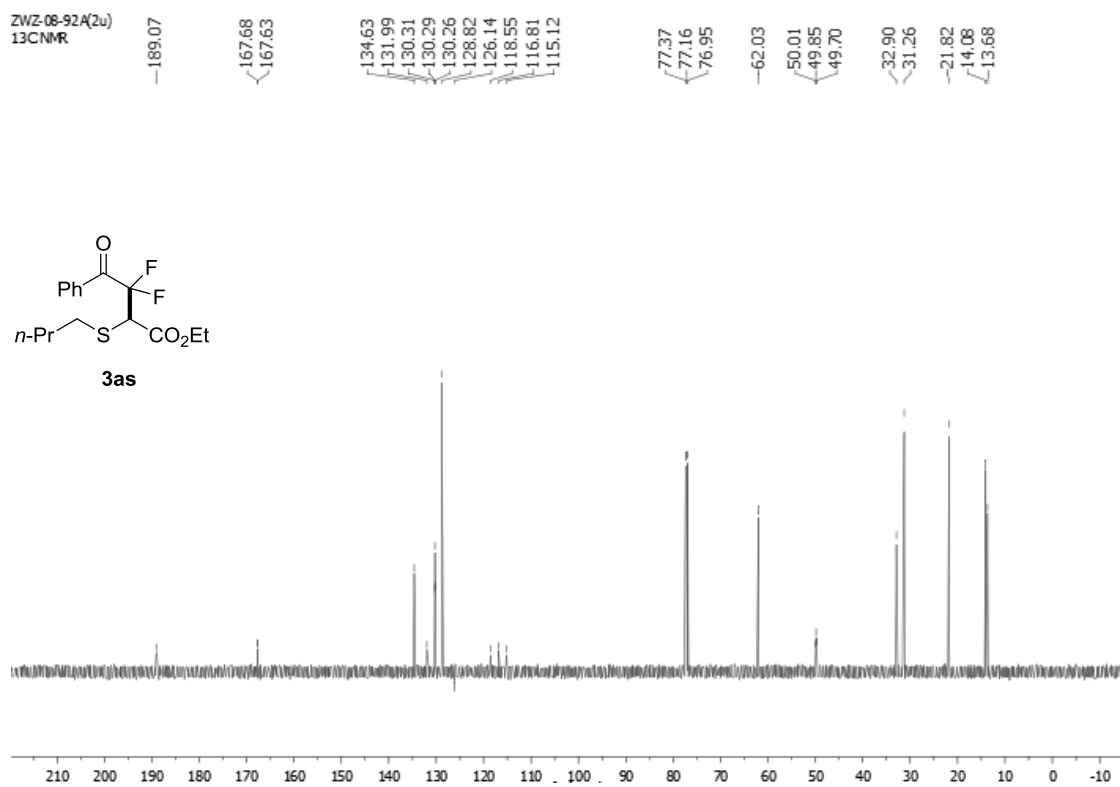

ZWZ-08-92A(2u)  
F19CPD

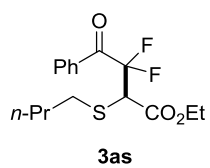

100.39  
100.91  
102.33  
102.85

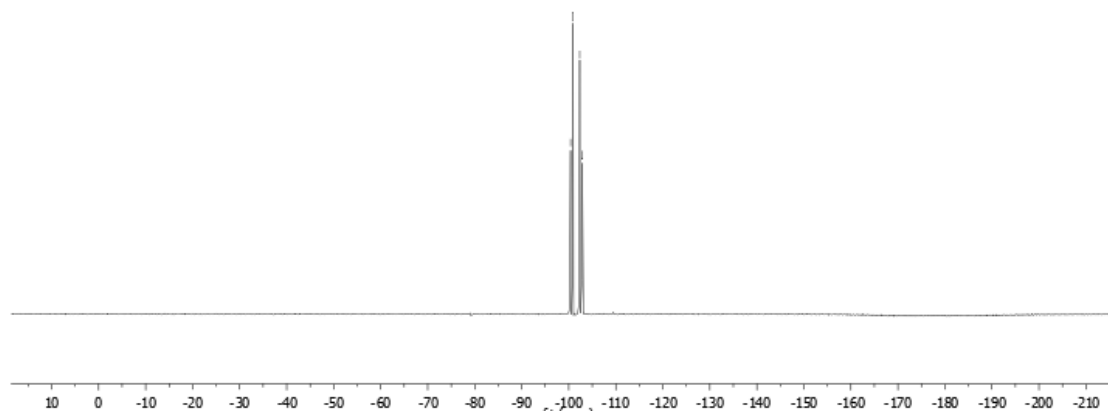

ZWZ-08-95E-1(2v)  
1H NMR

8.10 8.09 7.67 7.65 7.53 7.52 7.51 7.40 7.38 7.37 7.35 7.34 7.31 7.30 7.28 4.21 4.20 4.19 4.18 4.13 4.11 4.10 4.09 4.05 4.03 4.00 3.98 1.28 1.27 1.26

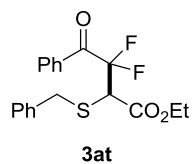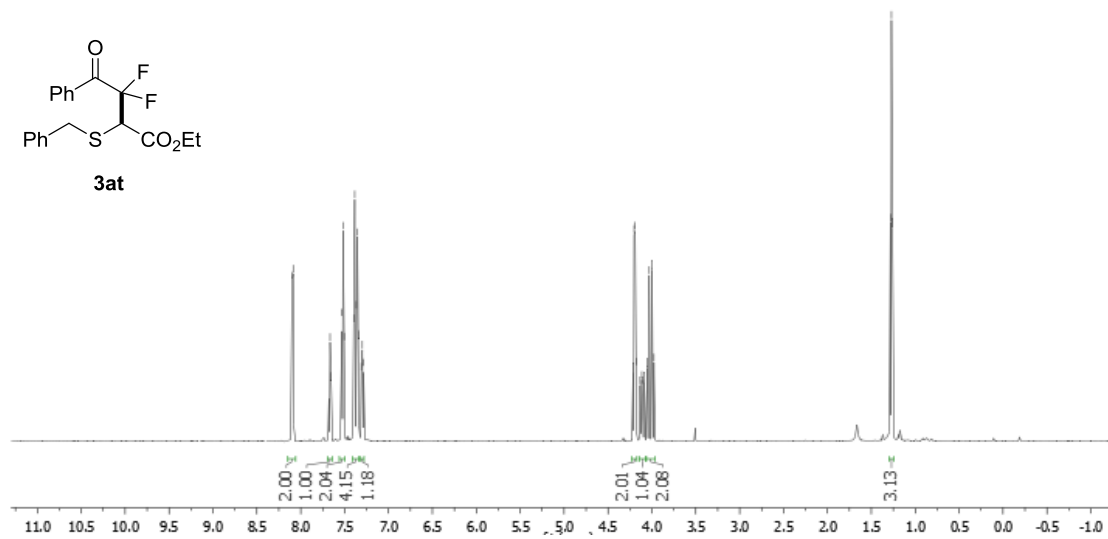

ZWZ-08-95E-1(2v)  
13CNMR

188.96  
188.76  
188.55  
167.44  
167.39  
136.29  
134.64  
130.28  
130.26  
130.24  
129.43  
128.82  
128.77  
118.63  
116.88  
115.19

77.37  
77.16  
76.95  
62.07  
49.23  
49.06  
48.91  
37.09  
14.05

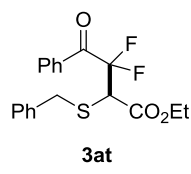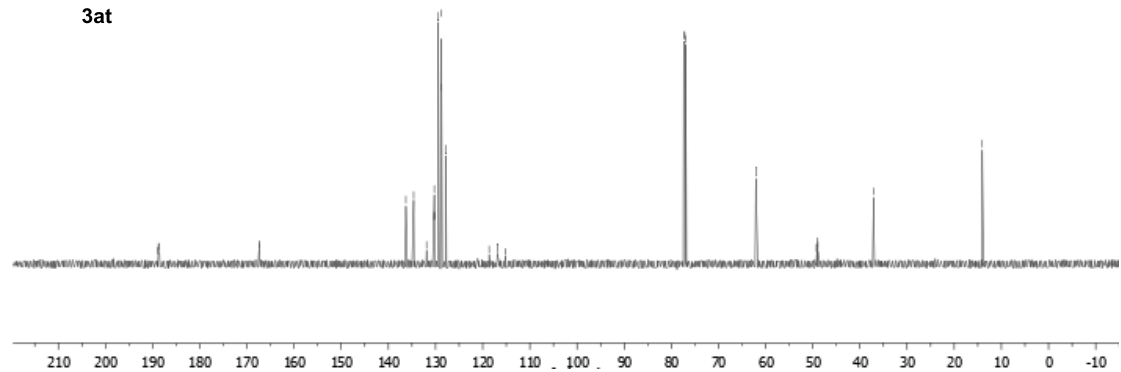

ZWZ-08-95E-1-F  
F19QD

99.79  
100.31  
102.04  
102.57

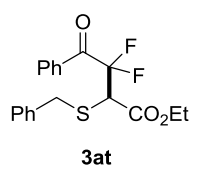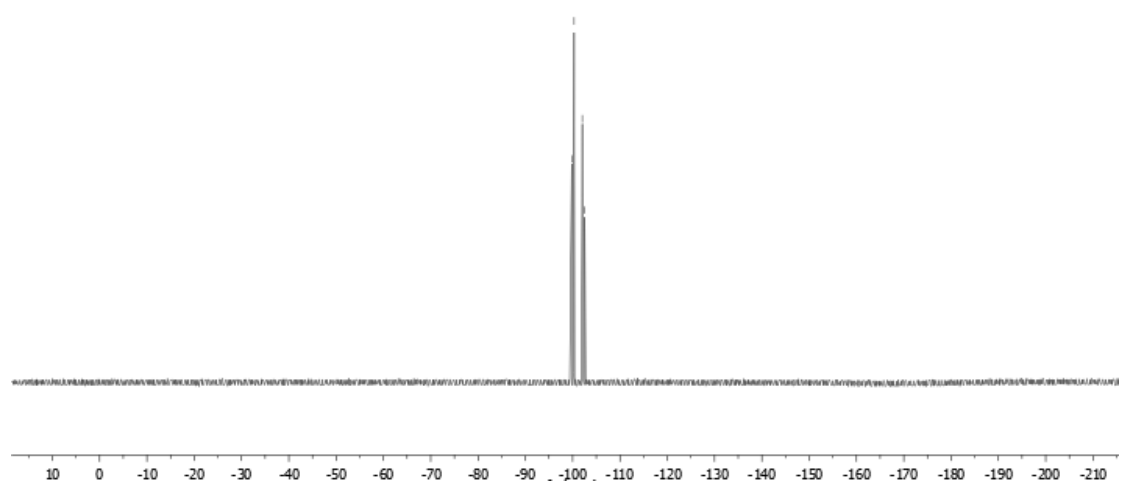



LWJ-03-Q15-1 (3au)

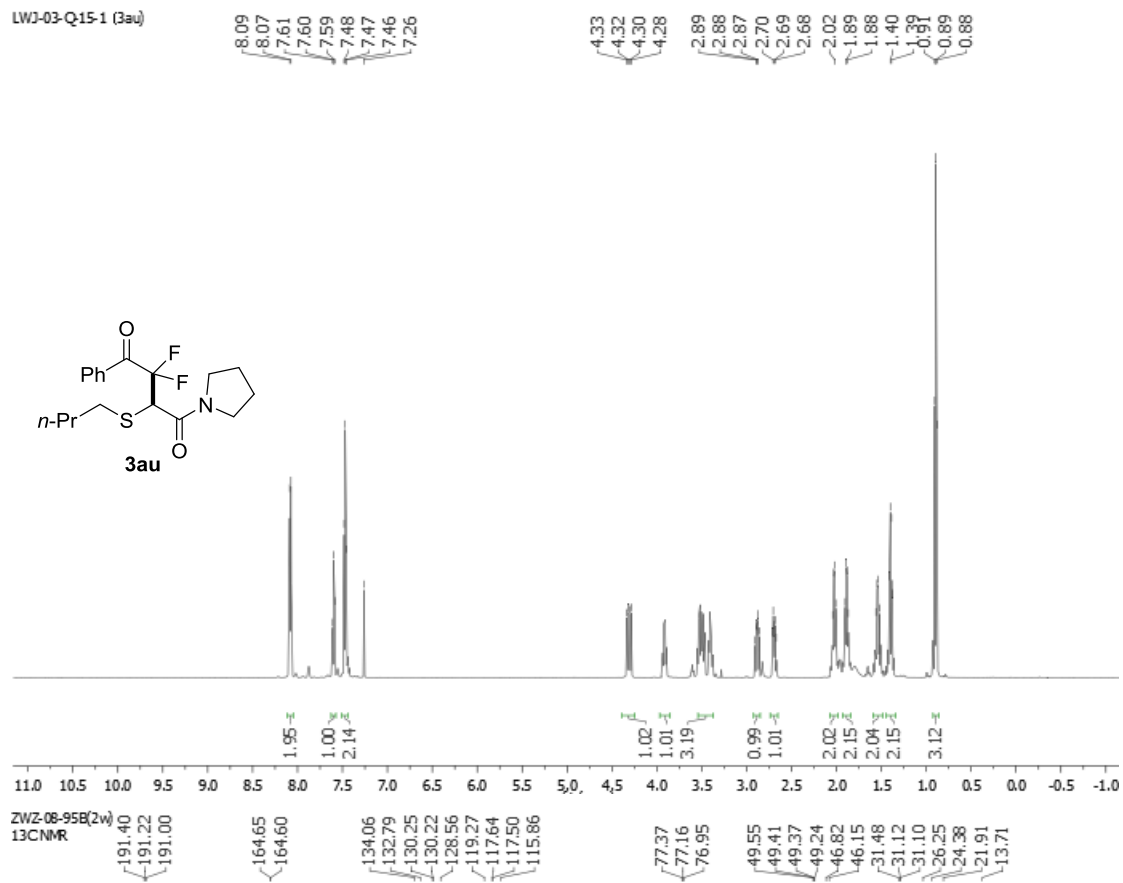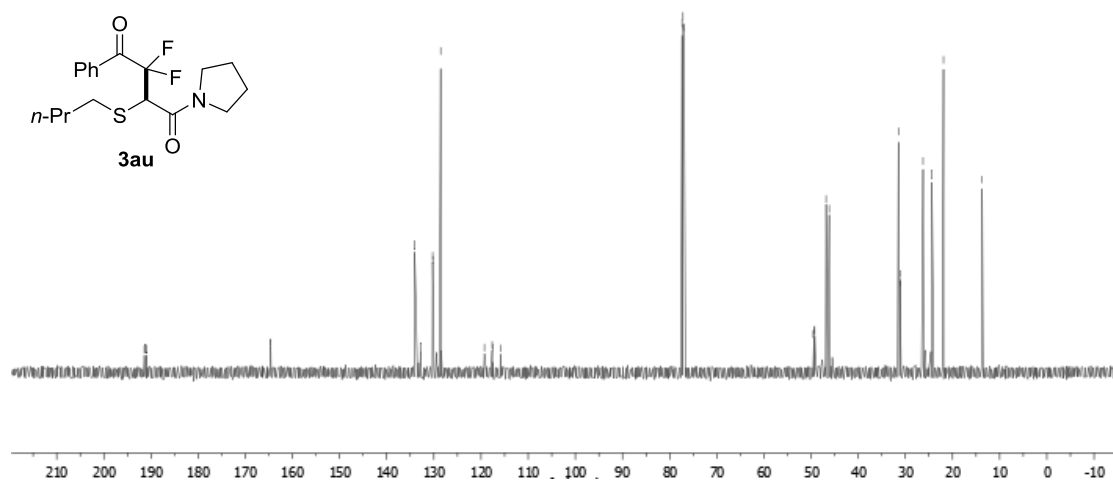

LWJ-03-Q15-1 (3au)

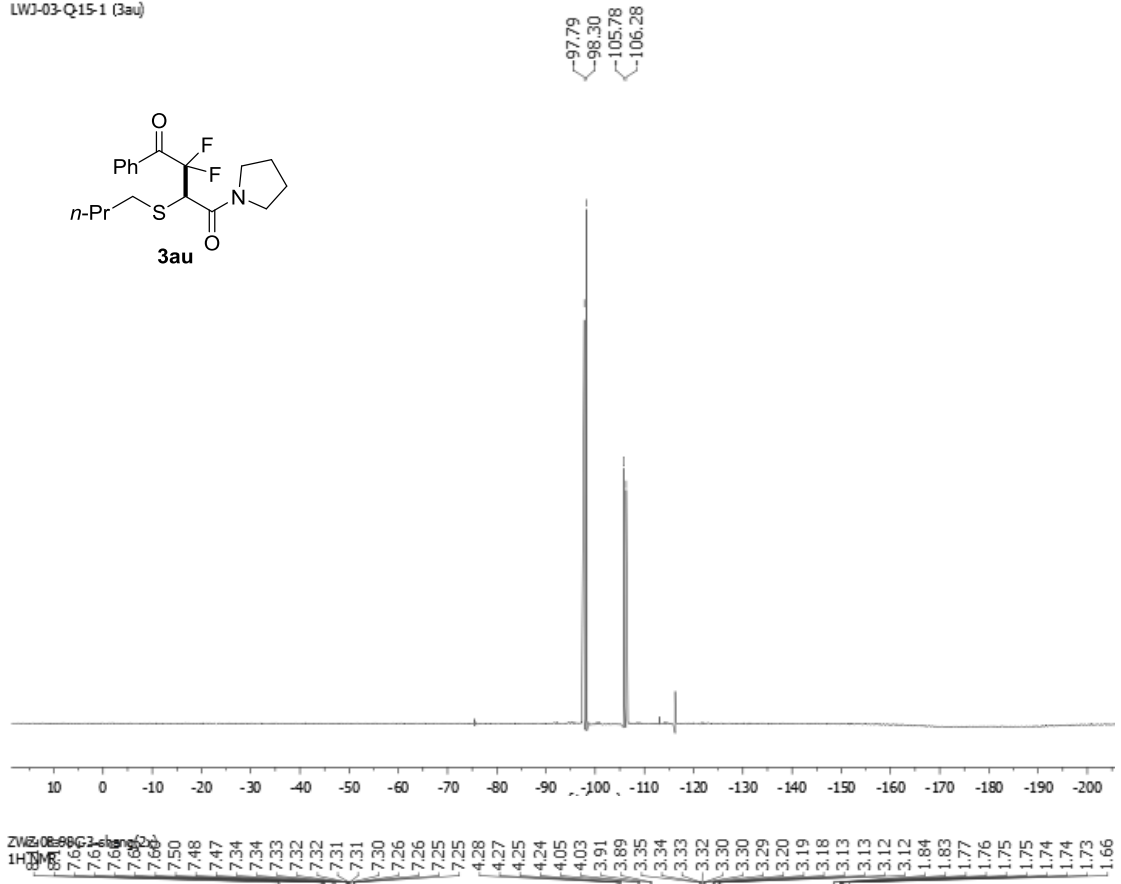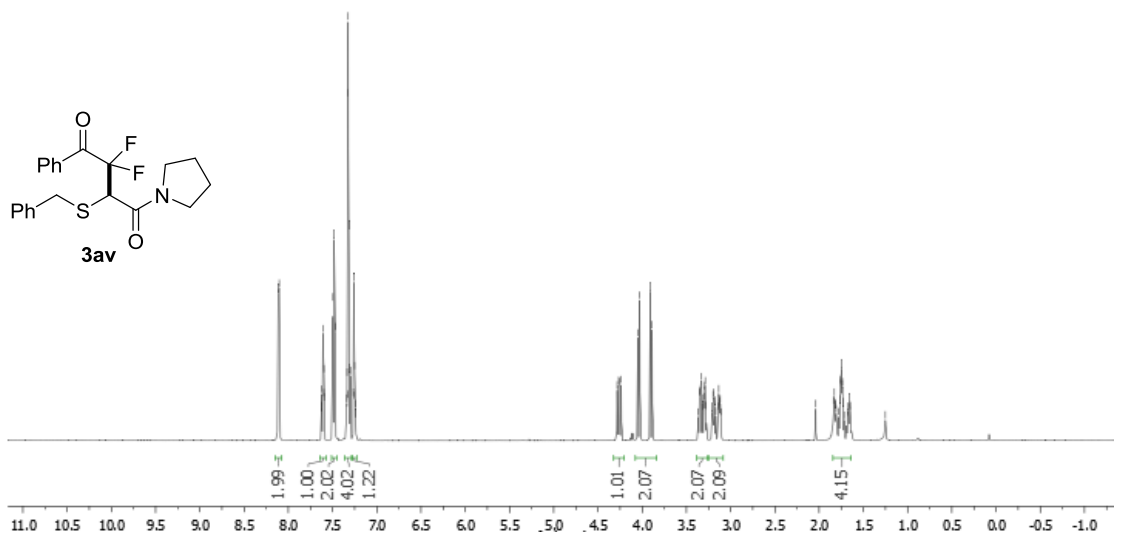

ZWZ-08-98G3-shang(2x)  
13CNMR

191.06  
190.96  
190.65

164.15  
137.36  
134.16  
132.73  
130.28  
130.25  
129.39  
128.62  
128.61  
127.47  
119.60  
117.96  
117.83  
116.18

77.37  
77.16  
76.95

48.54  
48.40  
46.24  
46.01  
35.96  
32.61  
25.98  
24.16

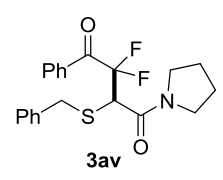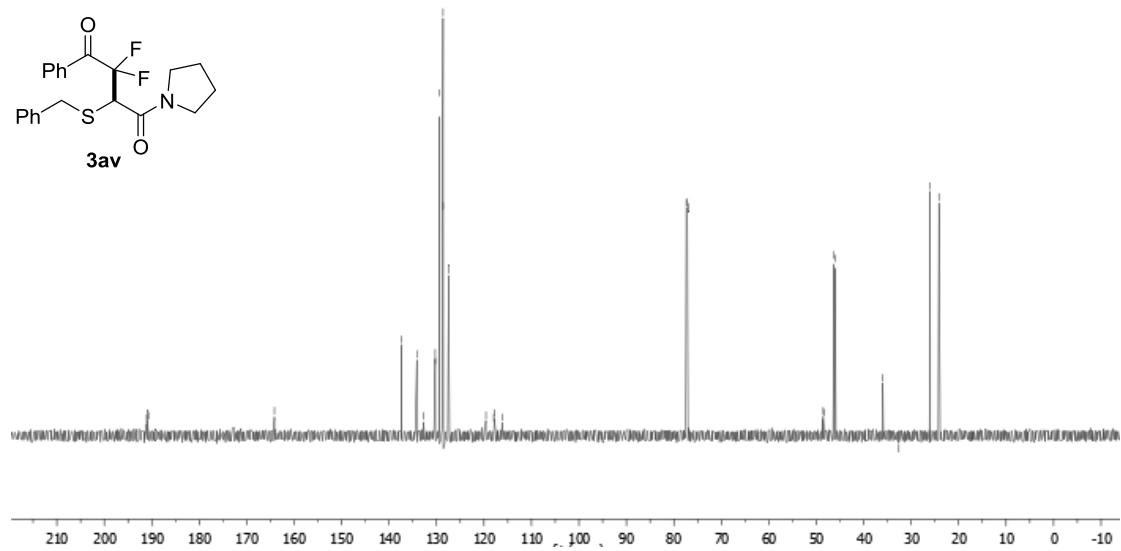

ZWZ-08-98G3-shang(2x)  
F19CPD

95.54  
96.02  
105.20  
105.68

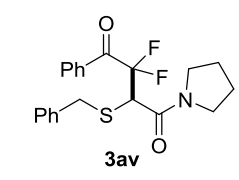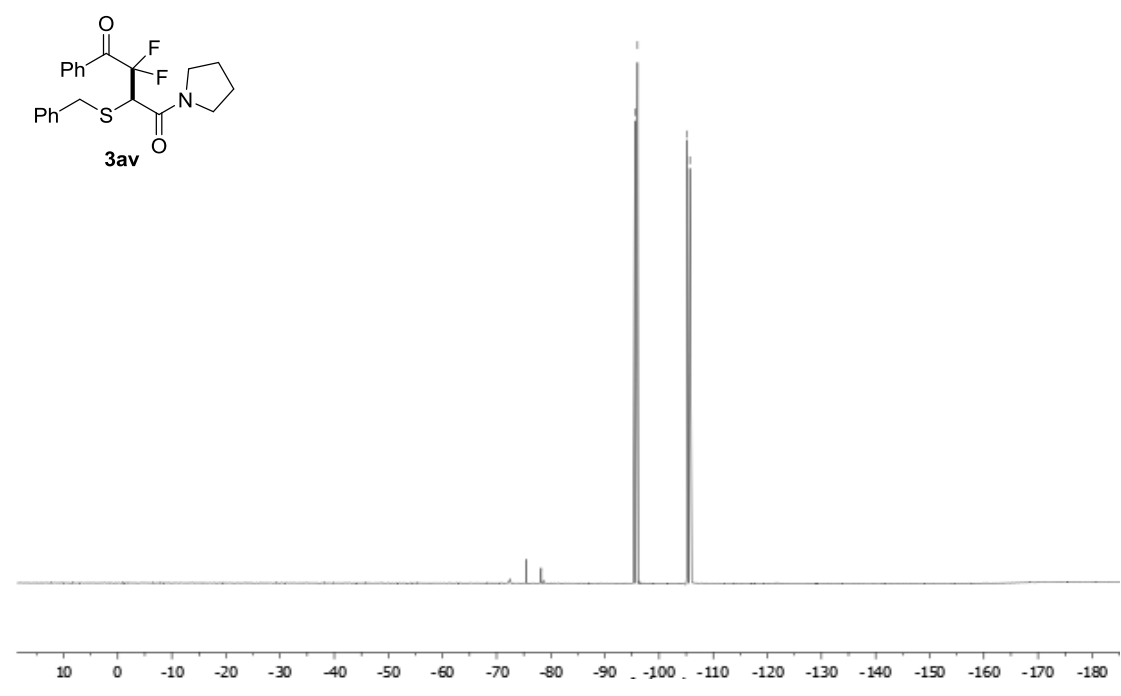

ZYG-03-87(2a)  
1H NMR

8.04  
7.65  
7.64  
7.63  
7.52  
7.51  
7.49  
7.48  
7.40  
7.39  
7.37  
7.35  
7.33  
7.32  
5.18  
5.15  
5.12

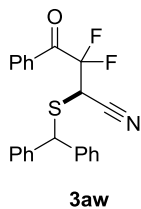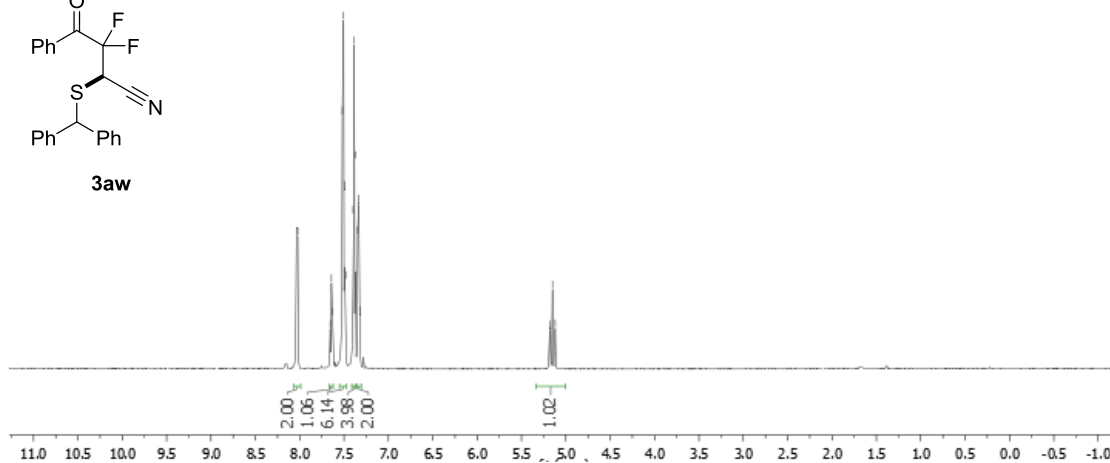

ZYG-03-87(2a)  
13C NMR

190.17  
189.97  
189.77  
136.40  
136.39  
134.09  
132.92  
130.17  
129.93  
129.91  
129.89  
129.79  
128.67  
127.62  
120.77  
119.05  
117.33  
77.37  
77.16  
76.95  
55.16  
55.02  
54.88

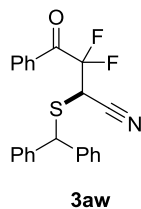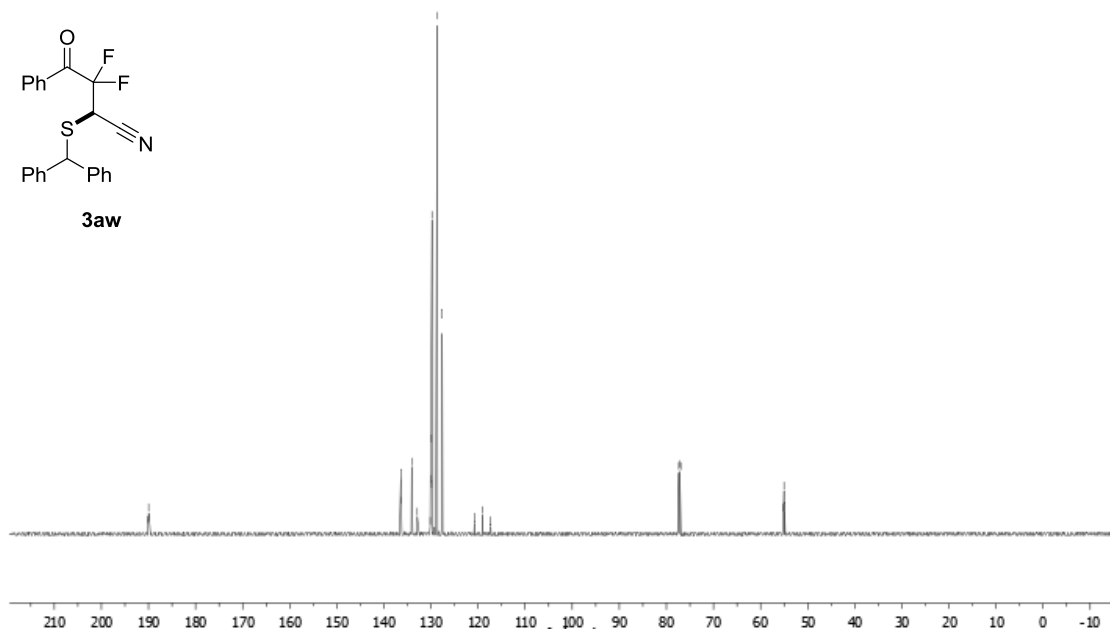

<sup>1</sup>H NMR (400 MHz, CDCl<sub>3</sub>) δ: 8.06 (d, 2H, ArH), 7.65 (d, 2H, ArH), 7.62 (d, 2H, ArH), 7.51 (d, 2H, ArH), 7.49 (d, 2H, ArH), 7.48 (d, 2H, ArH), 4.74 (d, 2H, CH<sub>2</sub>), 4.73 (d, 2H, CH<sub>2</sub>), 2.84 (s, 3H, Me), 2.83 (s, 3H, Me), 2.81 (s, 3H, Me), 2.74 (s, 3H, Me), 2.73 (s, 3H, Me), 2.72 (s, 3H, Me), 1.68 (s, 3H, Me), 1.67 (s, 3H, Me), 1.66 (s, 3H, Me), 1.62 (s, 3H, Me), 1.61 (s, 3H, Me), 1.60 (s, 3H, Me), 1.59 (s, 3H, Me), 1.58 (s, 3H, Me), 1.44 (s, 3H, Me), 1.43 (s, 3H, Me), 1.43 (s, 3H, Me), 1.42 (s, 3H, Me), 1.41 (s, 3H, Me), 1.41 (s, 3H, Me), 1.40 (s, 3H, Me), 1.39 (s, 3H, Me), 1.06 (s, 3H, Me), 1.04 (s, 3H, Me), 0.97 (s, 3H, Me), 0.95 (s, 3H, Me), 0.93 (s, 3H, Me), 0.93 (s, 3H, Me), 0.92 (s, 3H, Me), 0.92 (s, 3H, Me), -0.91 (s, 3H, Me), -0.90 (s, 3H, Me), -0.90 (s, 3H, Me), -0.89 (s, 3H, Me), -0.89 (s, 3H, Me), -0.85 (s, 3H, Me), -0.84 (s, 3H, Me), -0.78 (s, 3H, Me), -0.75 (s, 3H, Me), -0.74 (s, 3H, Me).

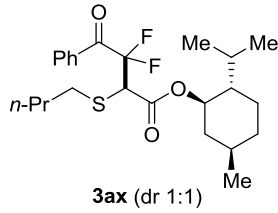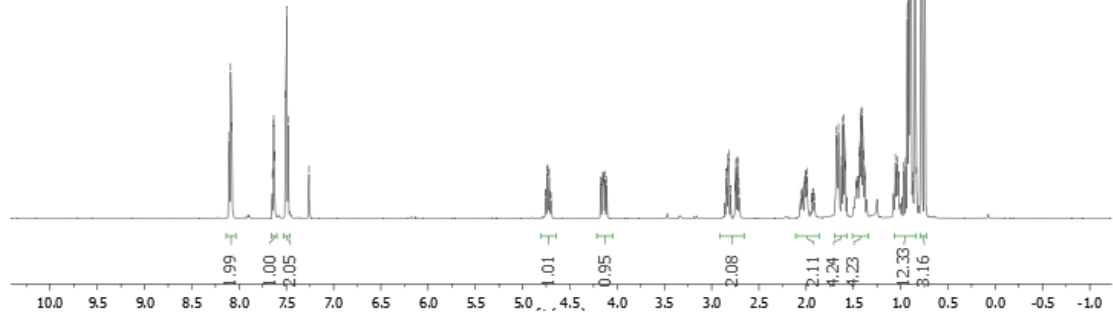

<sup>13</sup>C NMR (100 MHz, CDCl<sub>3</sub>) δ: 189.91, 189.88, 189.11, 189.07, 188.87, 188.81, 167.28, 167.22, 134.58, 134.52, 132.13, 132.00, 130.31, 130.25, 128.78, 118.63, 118.56, 116.88, 116.82, 115.13, 77.37, 77.16, 76.95, 76.12, 76.08, 50.37, 50.31, 50.21, 50.15, 50.05, 50.00, 47.07, 47.01, 40.48, 40.39, 34.25, 32.87, 31.51, 31.47, 31.33, 31.32, 26.12, 25.81, 23.39, 23.08, 22.09, 21.92, 21.82, 20.94, 20.81, 16.24, 15.92, 13.75.

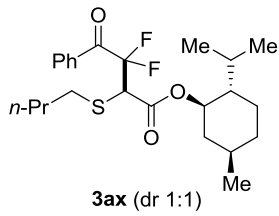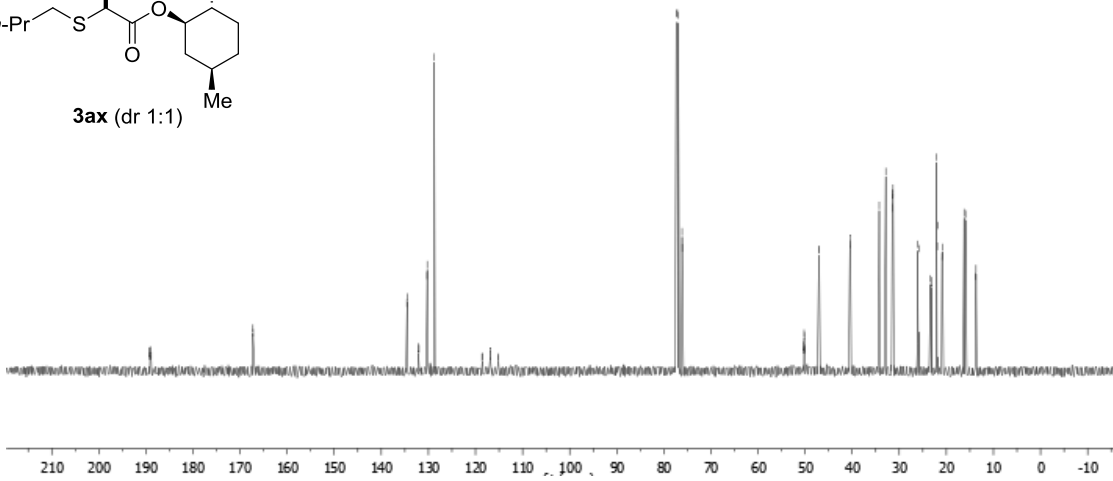

ZWZ-08-981-1-F  
F19CPD

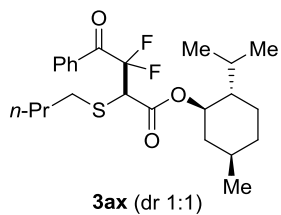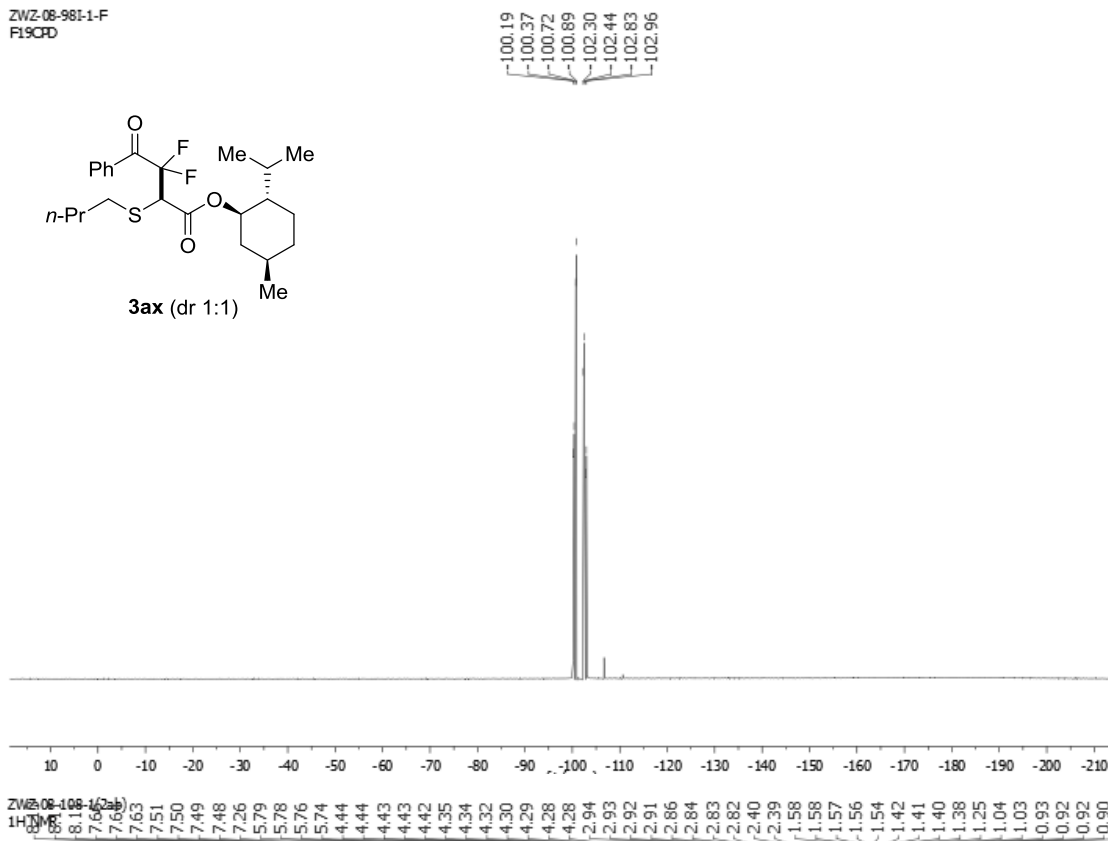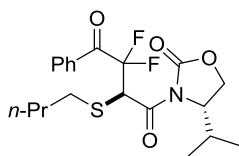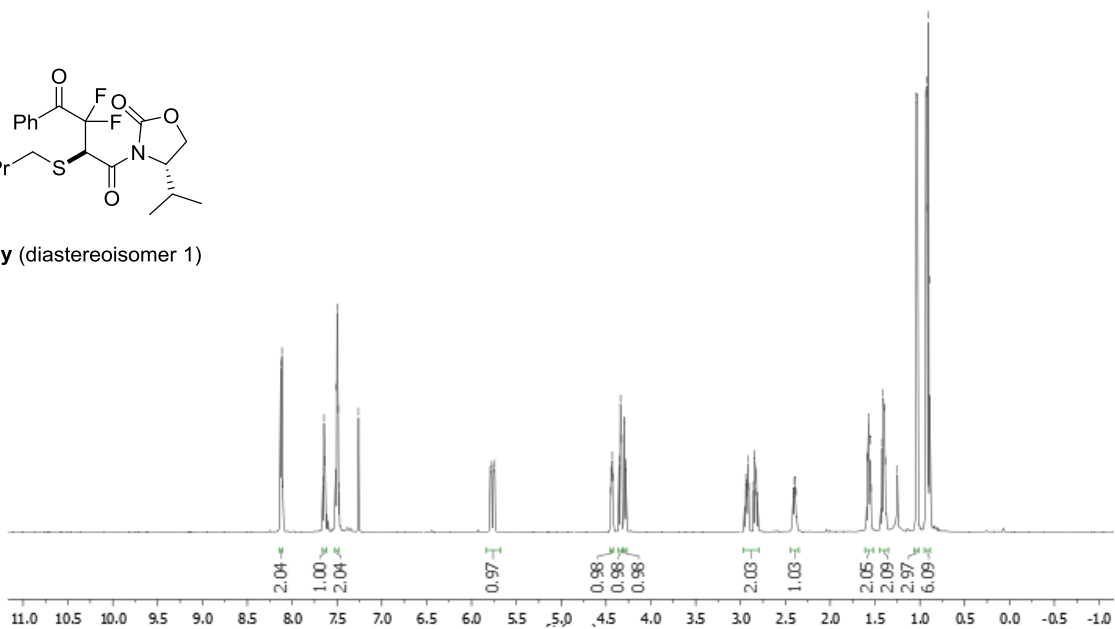

ZWZ-08-108-1(2ab)  
13CNMR

186.74  
166.42  
153.65  
134.81  
130.42  
130.30  
128.83  
128.61  
119.25  
117.46  
115.81  
77.37  
77.16  
76.95  
63.38  
59.06  
47.45  
47.26  
47.13  
32.94  
31.49  
28.38  
21.96  
18.05  
14.61  
13.74

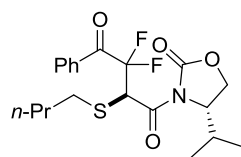

3ay (diastereoisomer 1)

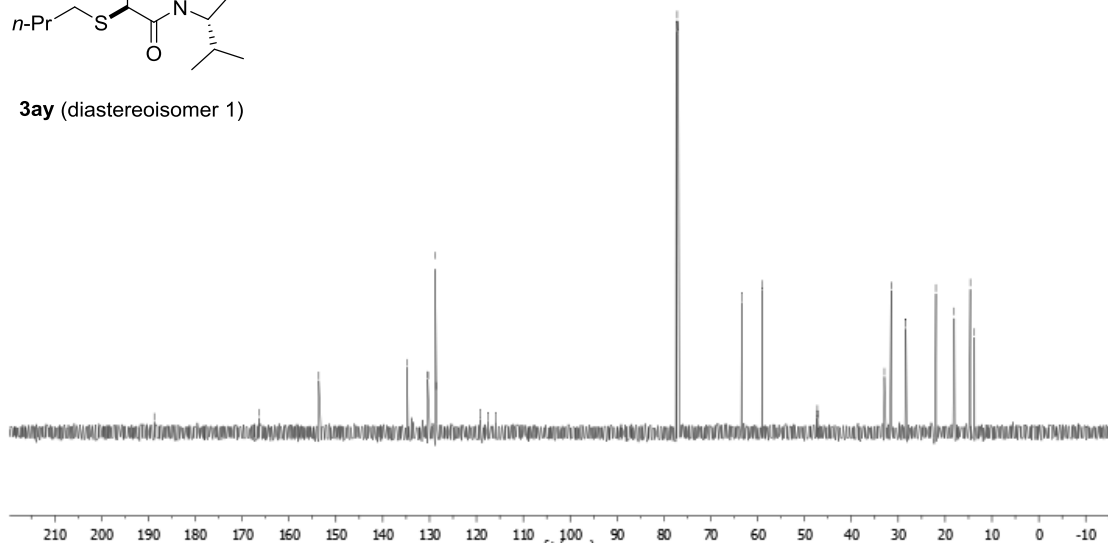

ZWZ-08-108-1-F  
F19CPD

96.87  
97.41  
101.02  
101.55

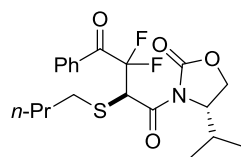

3ay (diastereoisomer 1)

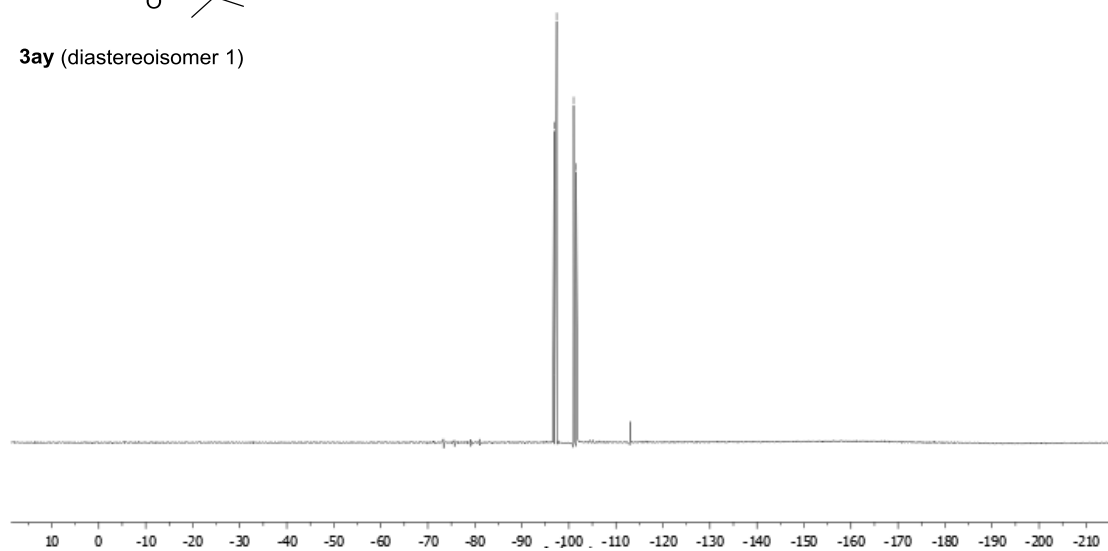

ZWZ-08-108-2-1(2ab)  
1H NMR

8.12, 8.11, 7.66, 7.65, 7.64, 7.52, 7.50, 7.49, 7.26, 5.81, 5.80, 5.78, 5.76, 4.53, 4.42, 4.40, 4.39, 4.28, 4.28, 4.27, 2.97, 2.95, 2.85, 2.83, 2.83, 2.35, 1.61, 1.61, 1.60, 1.60, 1.59, 1.42, 1.41, 1.41, 1.25, 0.97, 0.95, 0.93, 0.92, 0.91, 0.90, 0.00

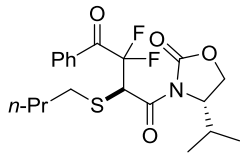

**3ay** (diastereoisomer 2)

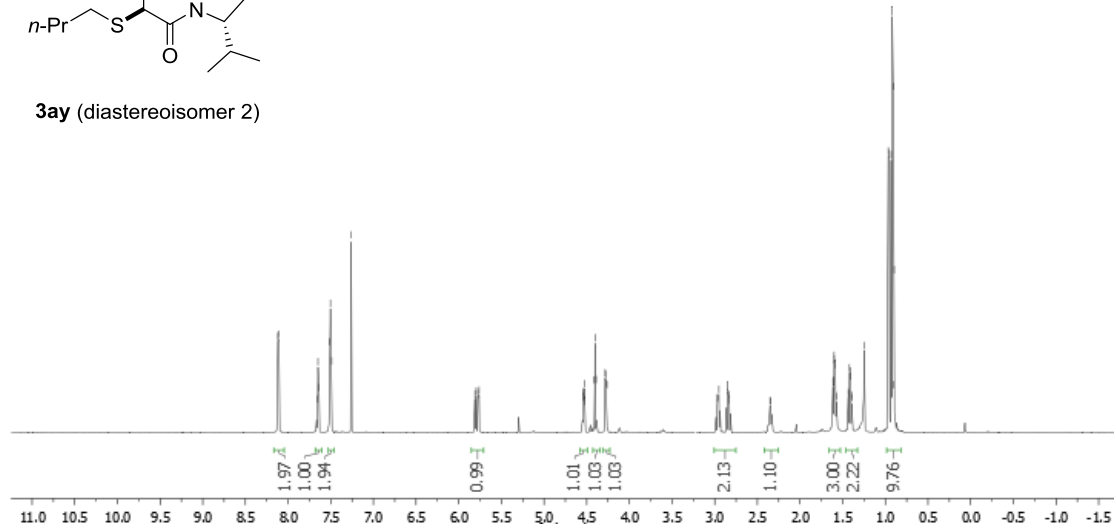

ZWZ-08-108-2-1(2ab)  
13C NMR

188.87, 166.83, 153.73, 134.90, 130.50, 128.87, 119.12, 77.37, 77.16, 76.95, 63.46, 58.26, 47.61, 47.49, 47.42, 47.30, 32.84, 31.52, 28.49, 21.98, 17.93, 14.86, 13.74

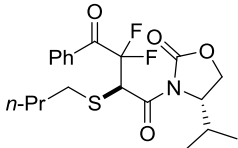

**3ay** (diastereoisomer 2)

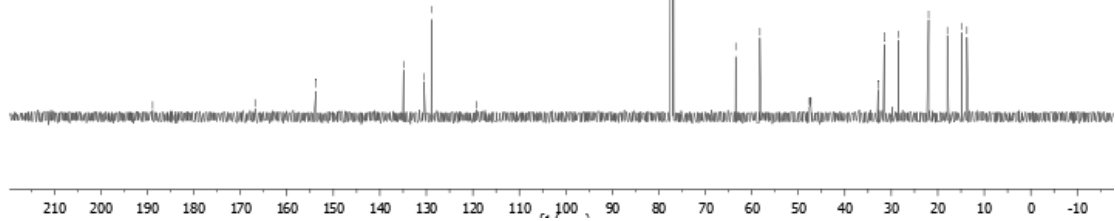



ZWZ-08-108-2-1-F  
F19CPD

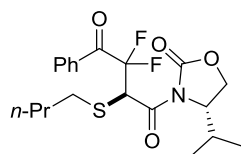

**3ay** (diastereoisomer 2)

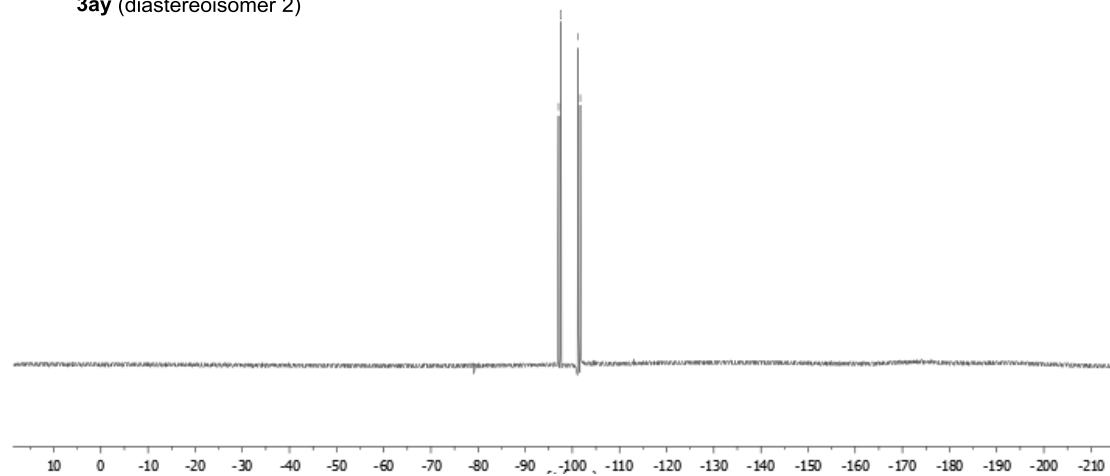

ZWZ-09-08-1(2am)  
1H NMR

8.04, 8.02, 7.65, 7.64, 7.63, 7.52, 7.51, 7.49, 7.26, 4.24, 4.21, 4.18, 3.19, 3.17, 3.15, 3.15, 2.53, 2.17, 2.17, 2.15, 2.15, 2.03, 2.01, 1.99, 1.97

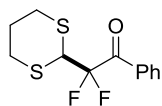

**3az**

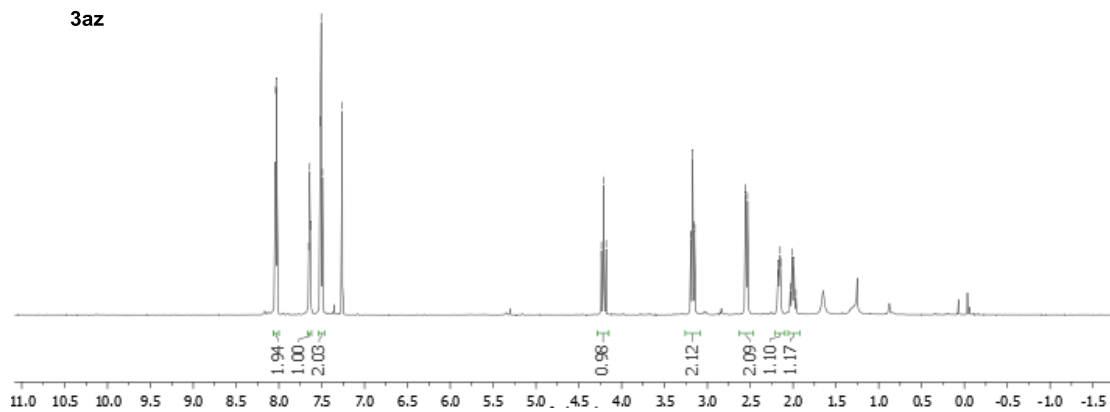

ZWZ-09-08-1(2am)  
13CNMR

134.32  
133.01  
129.86  
129.84  
129.82  
128.92  
121.49  
119.75  
118.02

77.37  
77.16  
76.95

40.57  
40.40  
40.23  
25.65  
25.64  
25.63  
24.36

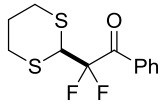

**3az**

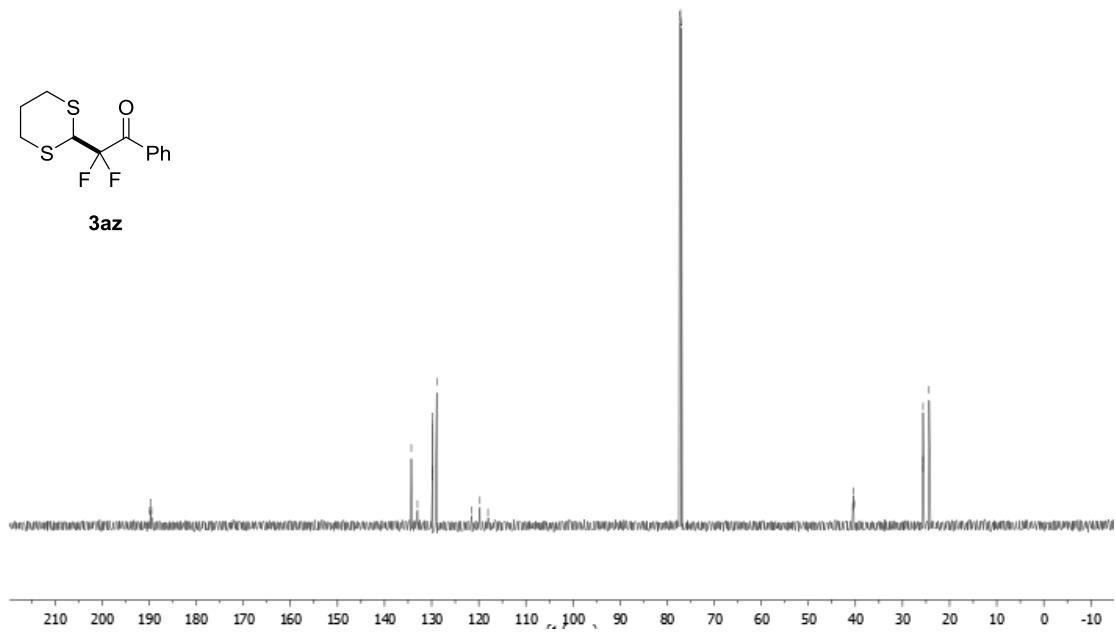

ZWZ-09-08-1-F  
F19CPD

96.37

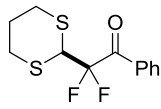

**3az**

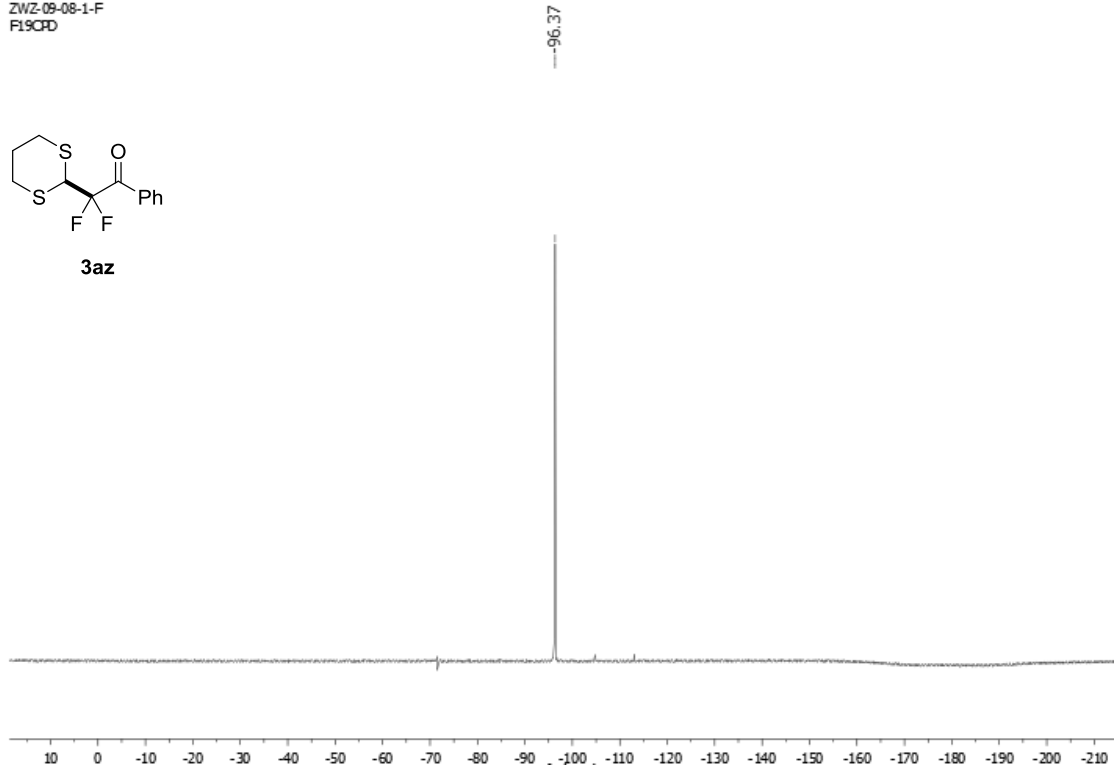

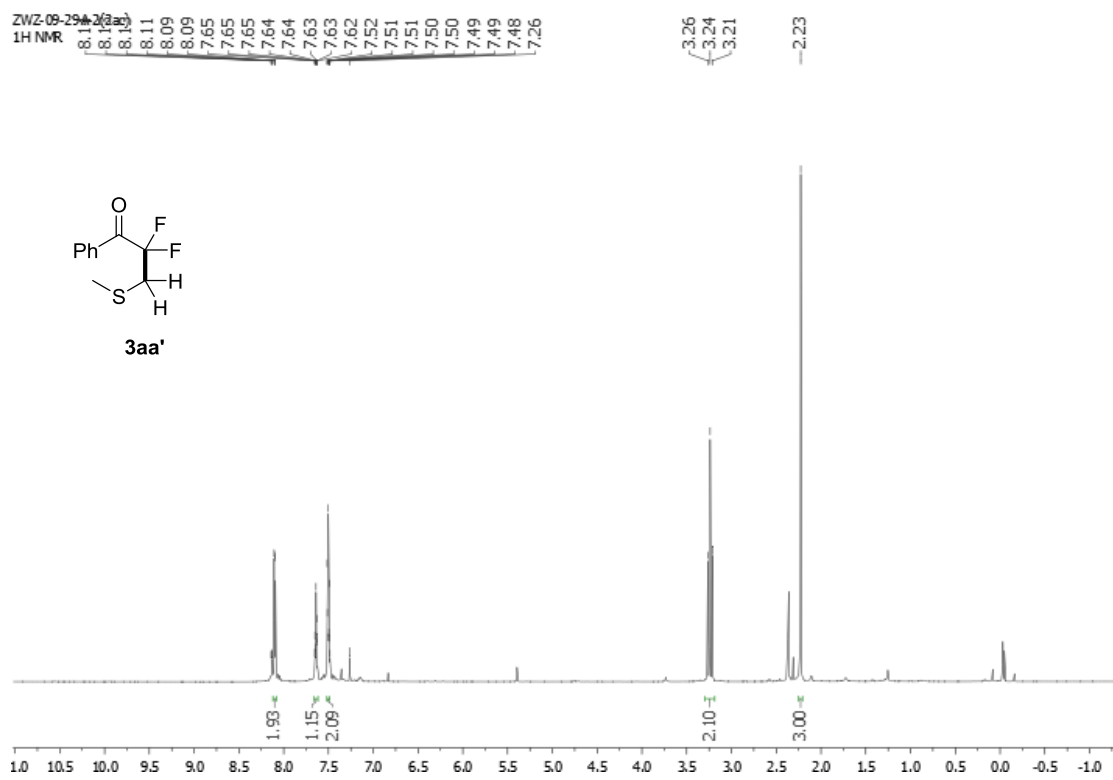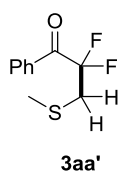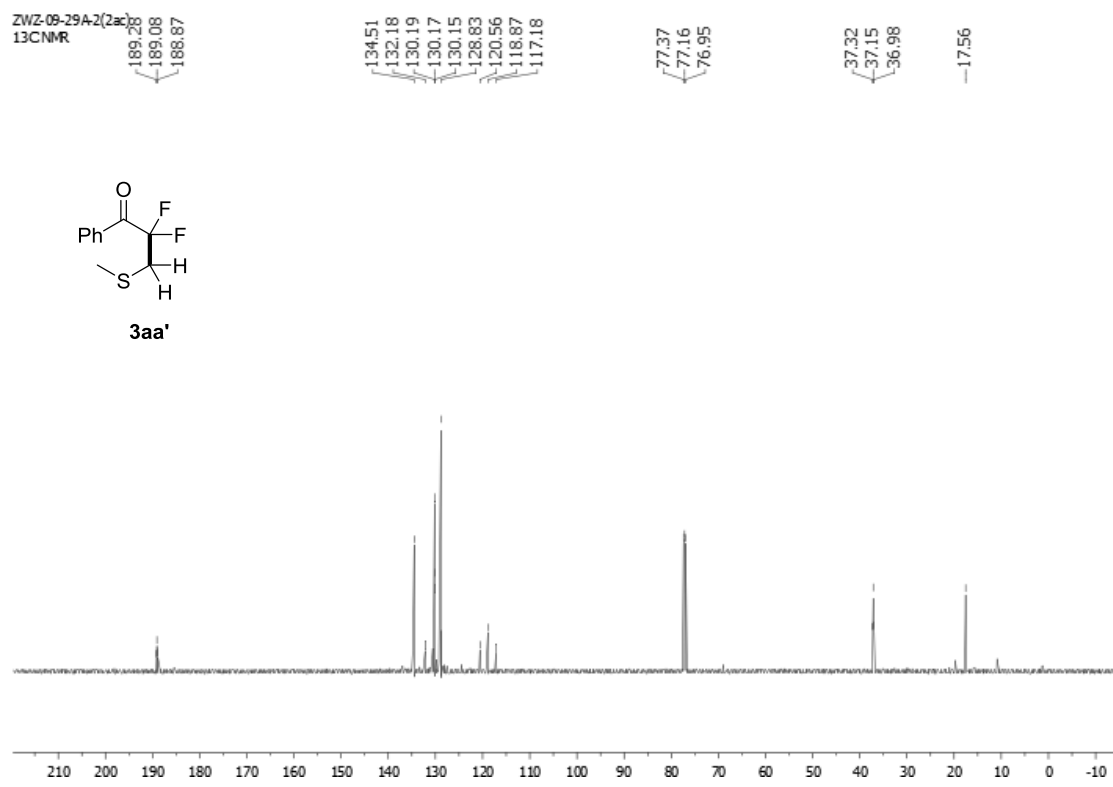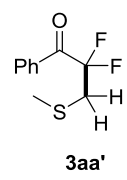

ZWZ-09-29A-2-F  
F19CPD

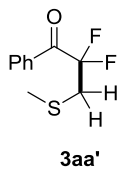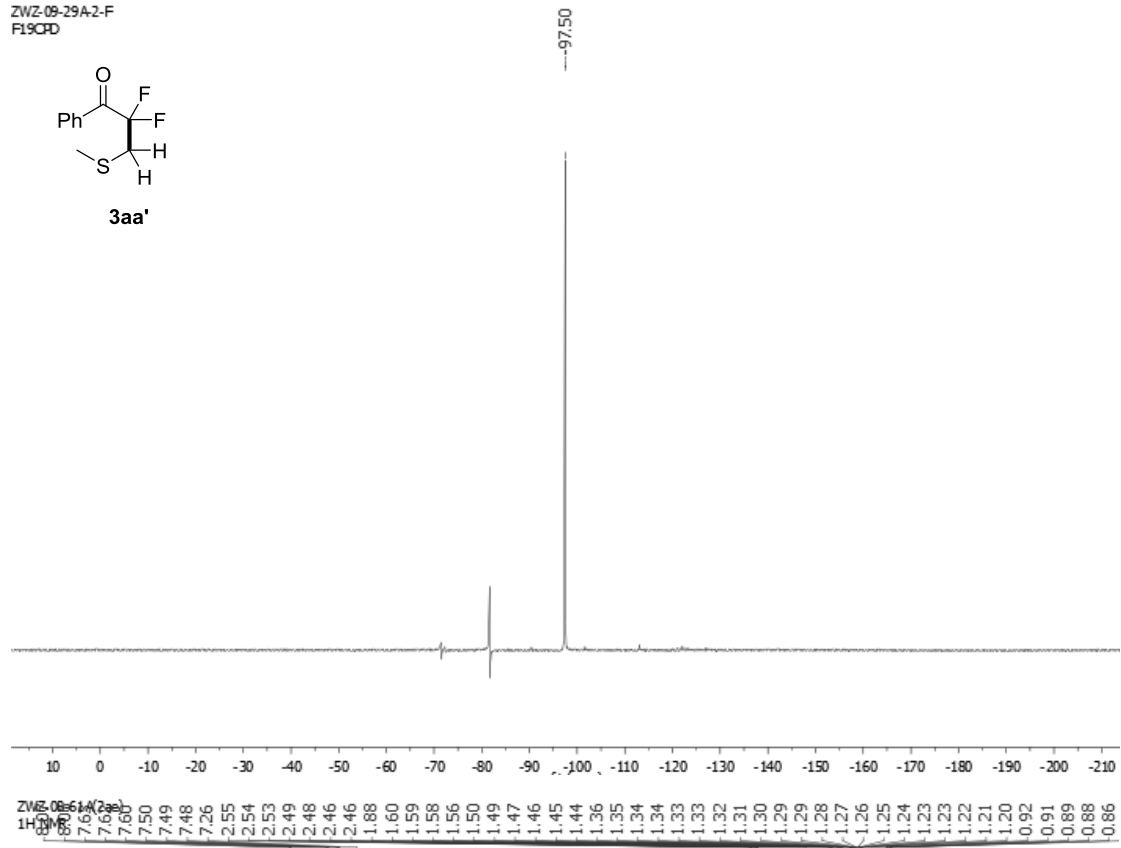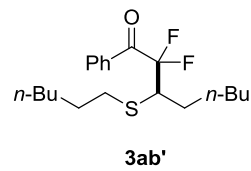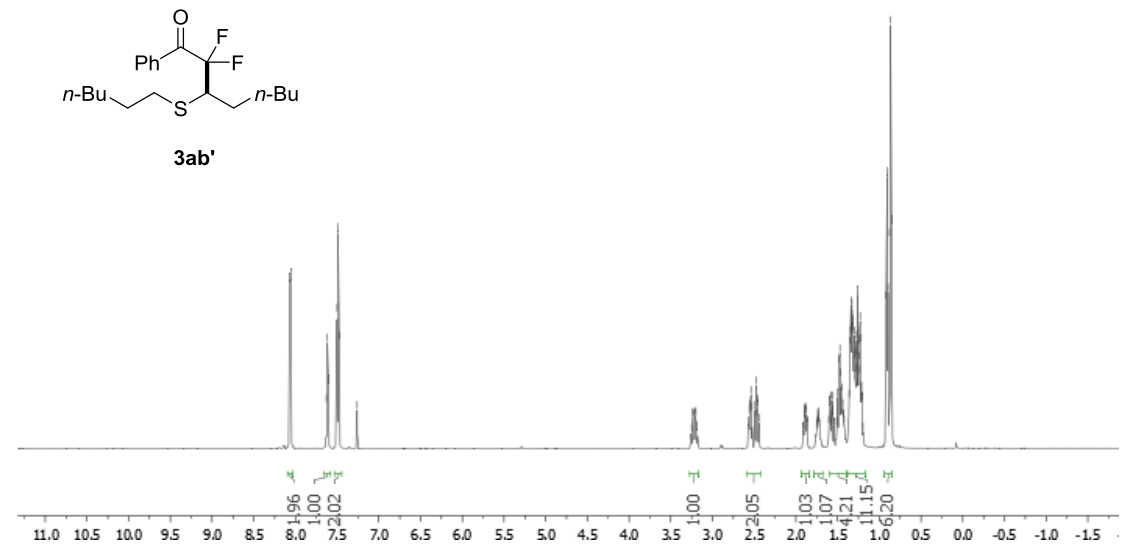

ZWZ-08-61A(2ae)  
13CNMR

190.64

134.05  
133.49  
130.08  
130.06  
130.03  
128.72  
121.22  
119.51  
117.80

77.37  
77.16  
76.95

48.56  
48.41  
48.25  
32.43  
31.57  
31.46  
29.39  
28.51  
27.82  
26.51  
22.63  
22.62  
14.14  
14.13

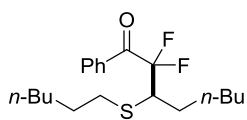

3ab'

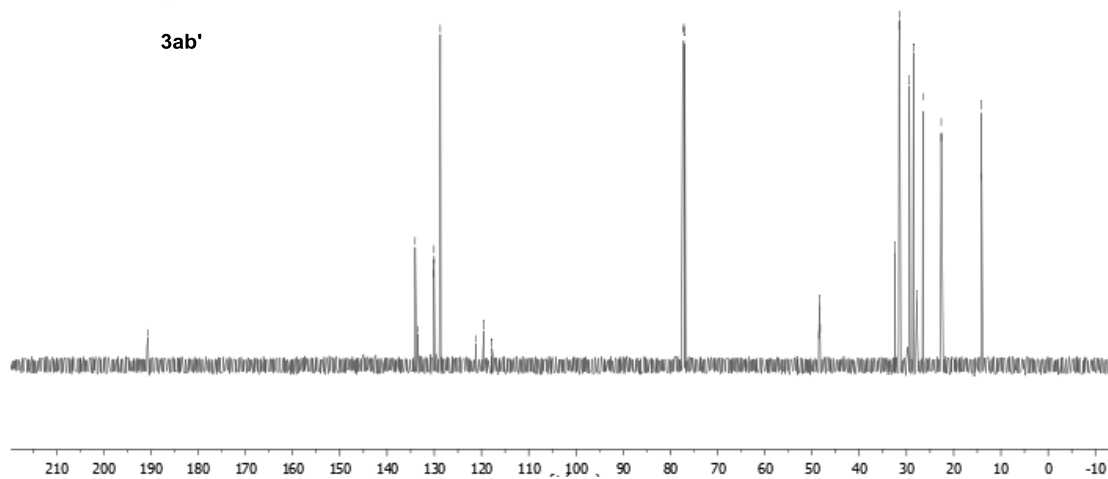

ZWZ-08-61A(2ae)  
F19CPD

96.29  
96.77  
107.28  
107.76

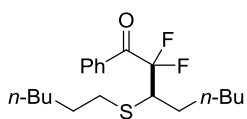

3ab'

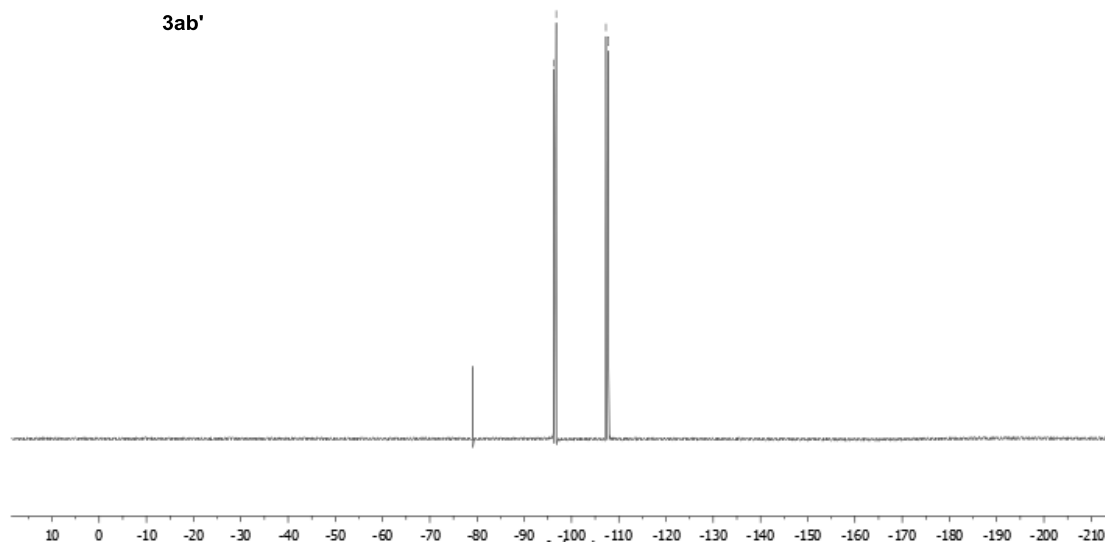

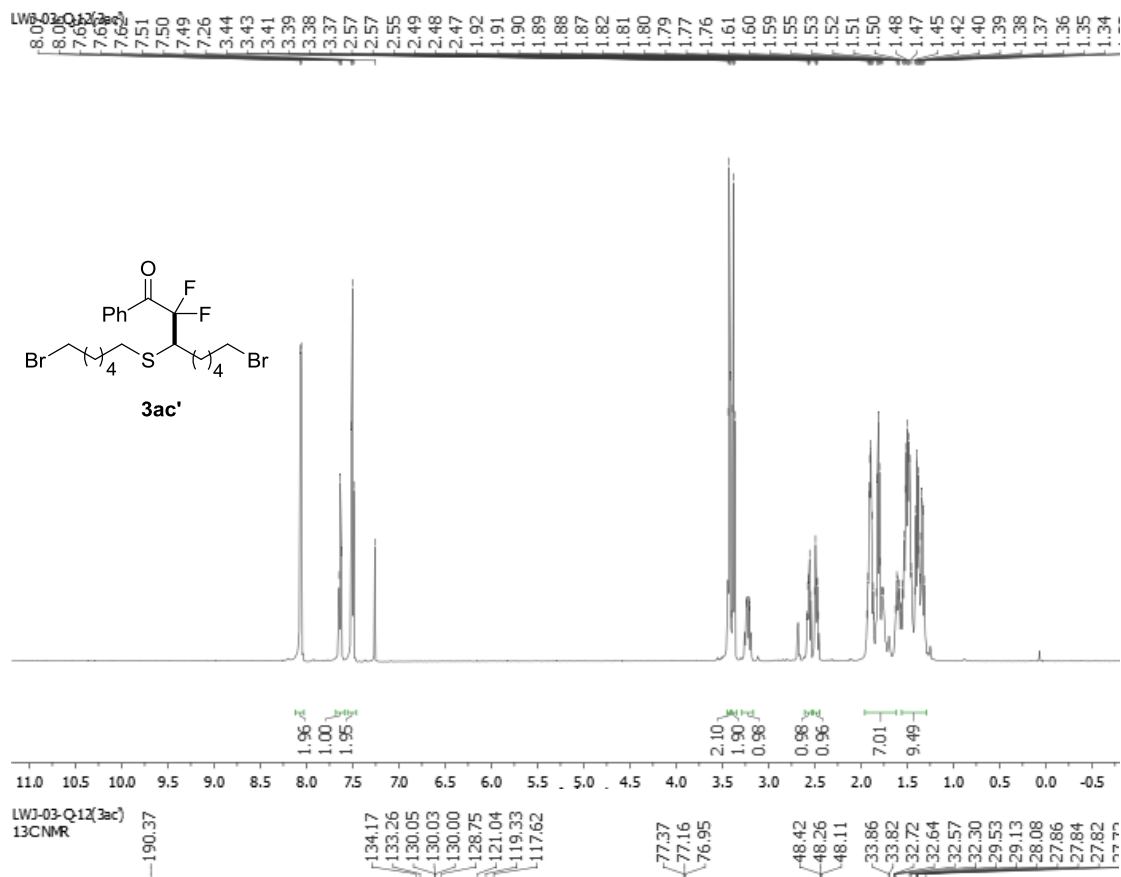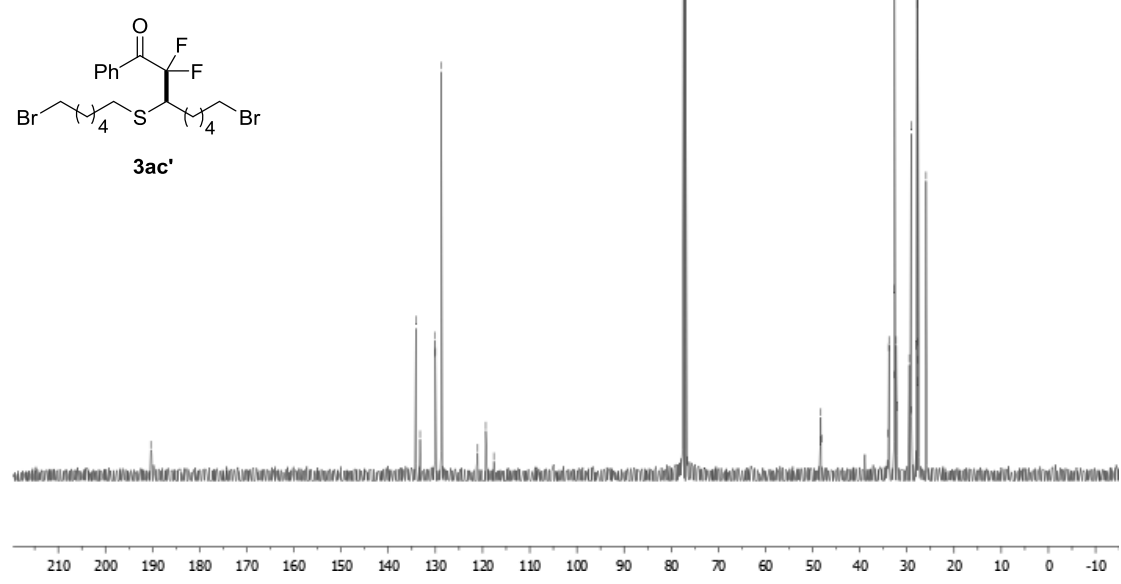



ZWZ-08-20D-1(2a)  
13CNMR

190.57  
190.31  
190.12

140.07  
137.98  
134.21  
133.35  
130.13  
130.11  
130.09  
129.85  
128.79  
128.56  
128.47  
128.46  
128.45  
126.97  
126.39  
120.86  
119.14

77.37  
77.16  
76.95

51.18  
51.02  
50.87  
35.60  
34.83  
34.39

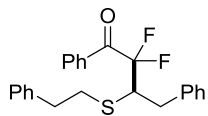

3ad'

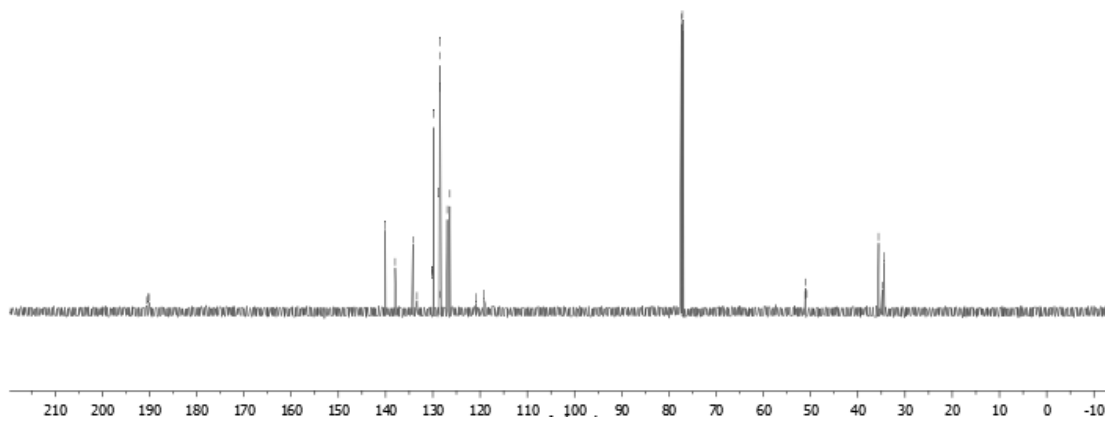

ZWZ-08-20-1  
F19CPD

95.58  
96.07  
107.60  
108.09

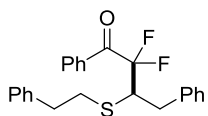

3ad'

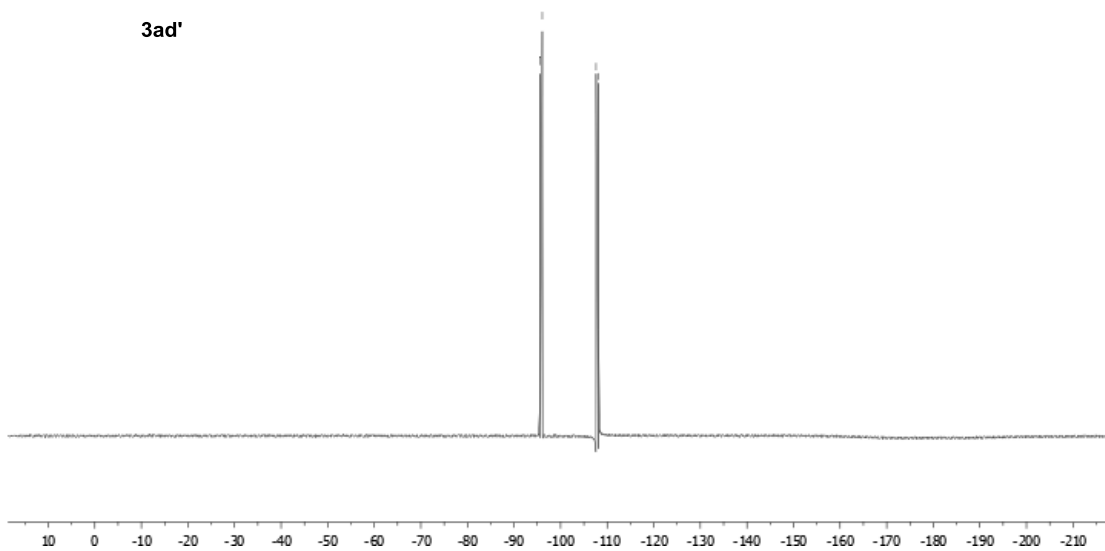



ZWZ-09-29B-2(2ah)  
1H NMR

8.12  
8.10  
7.64  
7.62  
7.51  
7.50  
7.49  
7.26  
4.20  
4.19  
4.18  
4.17  
4.16  
4.15  
4.14  
4.13  
2.89  
2.88  
2.87  
2.86  
2.21  
2.20  
2.19  
2.18  
2.17  
2.16  
2.15  
2.14  
2.05  
2.04  
2.03  
2.02

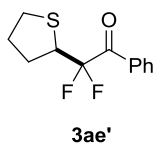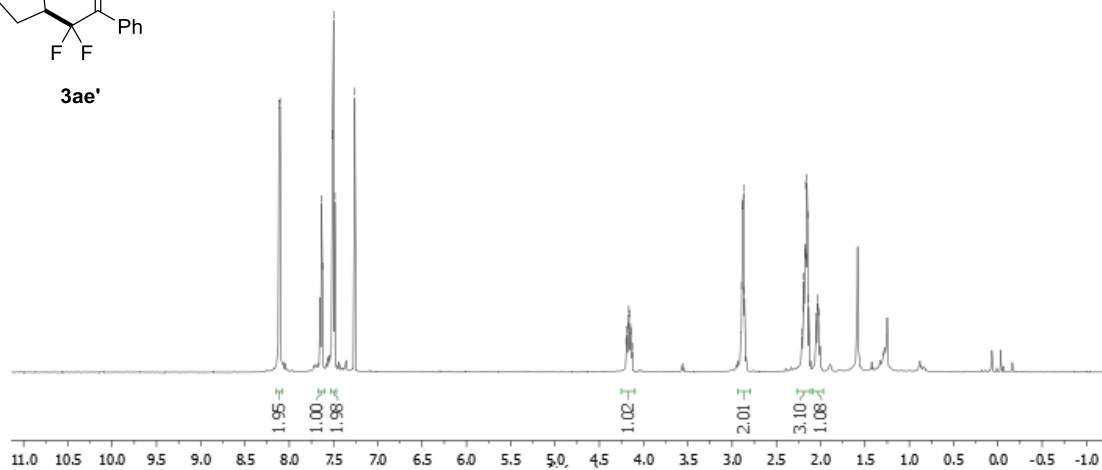

ZWZ-09-29B-2(2ah)  
13C NMR

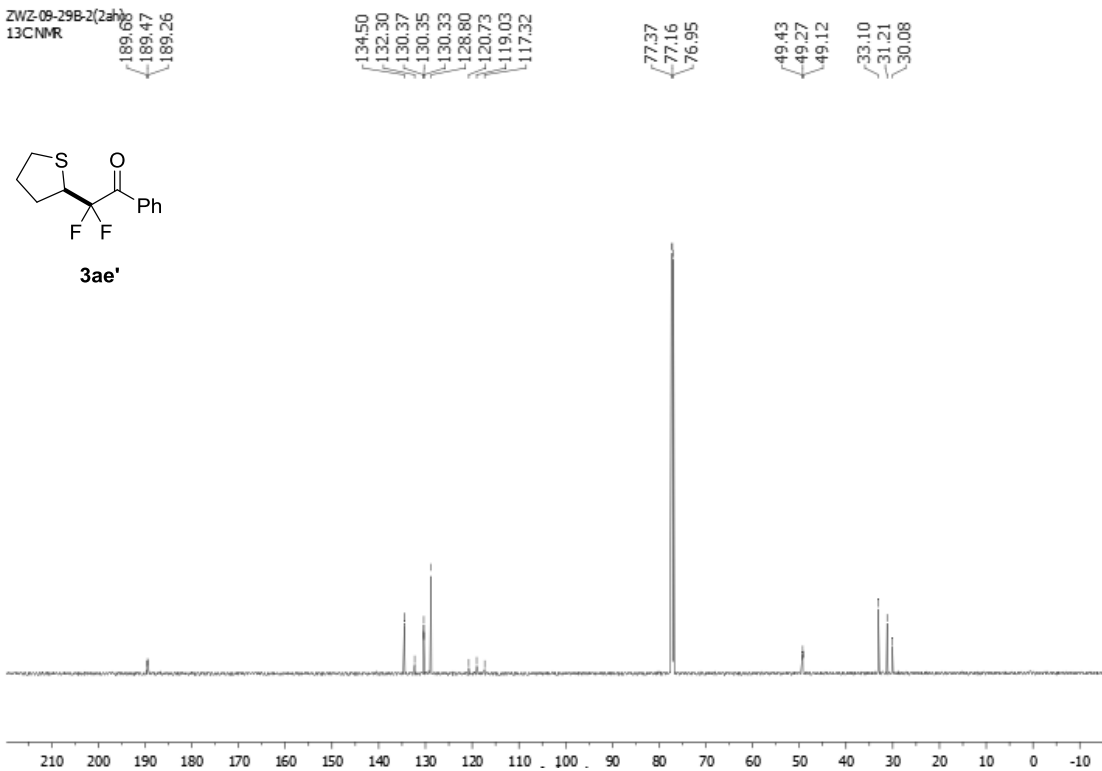

ZWZ-09-29B-2-F  
F19CPD

100.87  
101.37  
106.20  
106.70

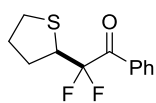

**3ae'**

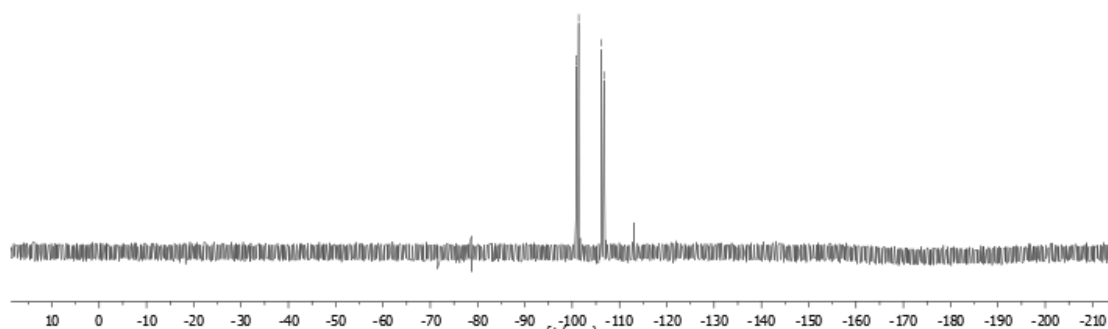

ZWZ-08-50K(2aj)  
1H NMR

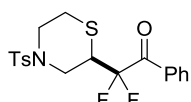

**3af'**

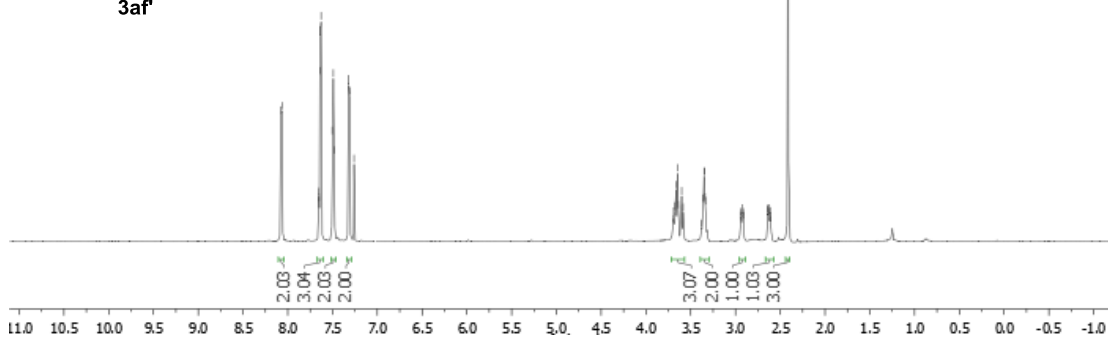

ZWZ-08-50K(2aj)  
13CNMR

144.05  
134.67  
133.76  
132.02  
130.16  
129.97  
128.84  
127.45  
119.93  
118.21  
116.48

77.37  
77.16  
76.95

47.01  
45.80  
40.30  
40.15  
40.00

26.30  
21.57

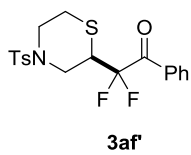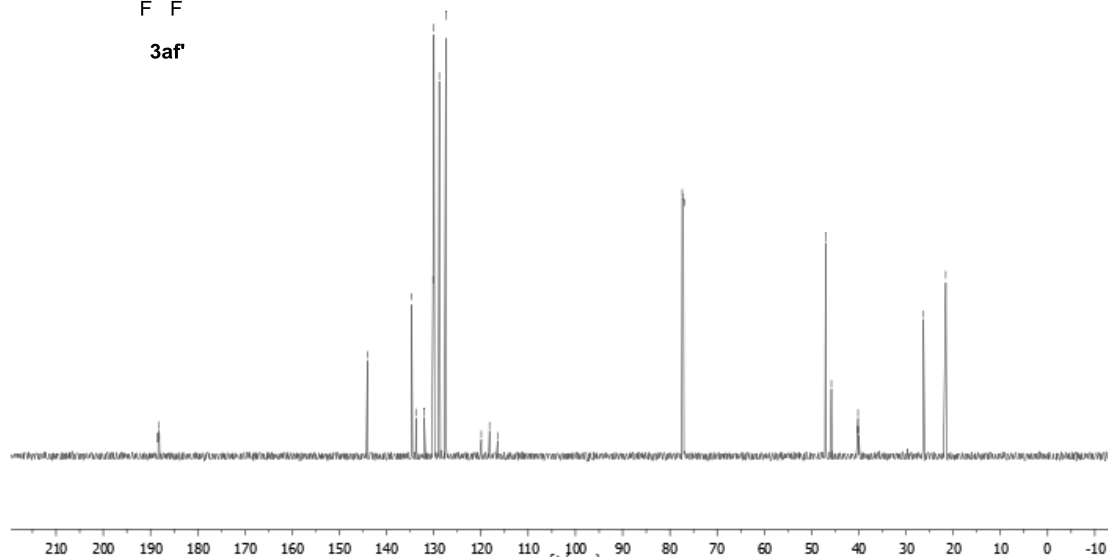

ZWZ-08-50K(2aj)  
F19CPD

97.68  
98.18  
104.82  
105.33

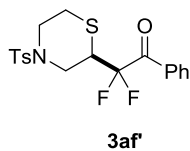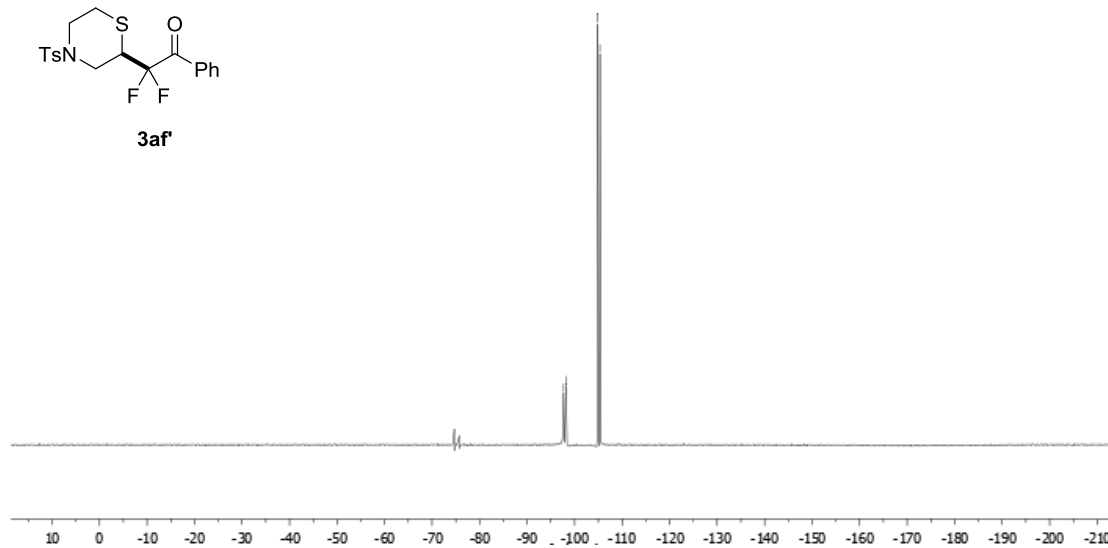

ZWZ-08-50O4(2ak)  
1H NMR

8.08  
8.07  
7.63  
7.62  
7.51  
7.49  
7.26  
4.56  
4.54  
4.39  
4.25  
4.23  
3.94  
3.72  
3.61  
3.59  
3.47  
3.37  
3.26  
3.24  
3.23  
3.00  
2.92  
2.35  
2.33  
-1.39

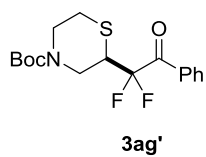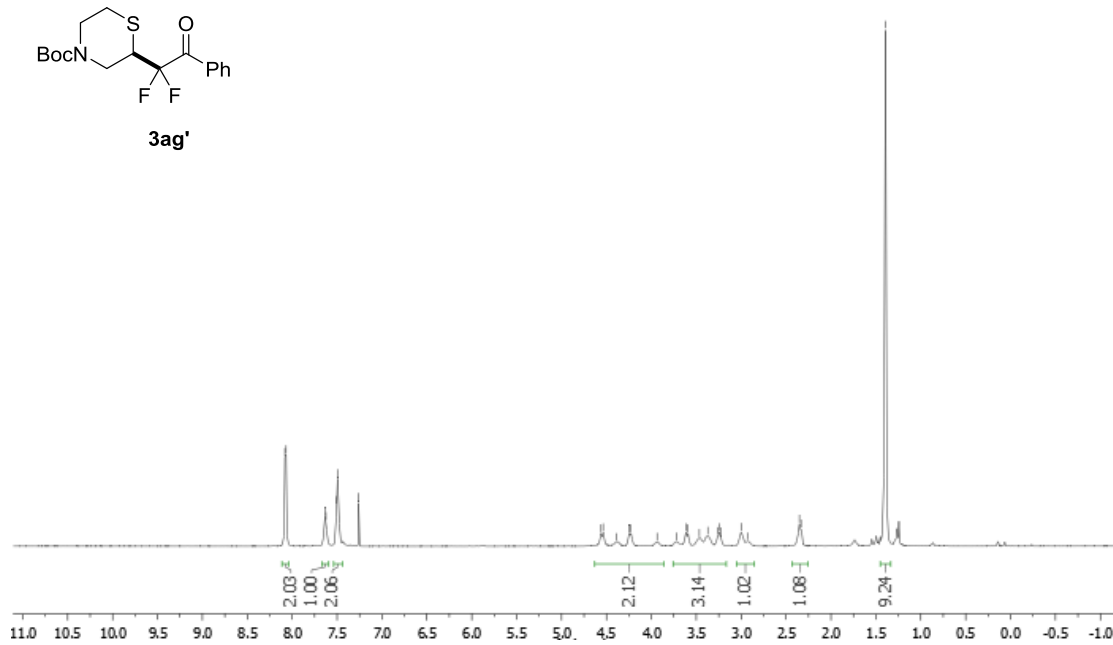

ZWZ-08-50O4(2ak)  
13CNMR

-189.13  
-154.19  
134.51  
132.46  
130.19  
128.82  
-117.63  
80.44  
77.37  
77.16  
76.95  
44.58  
44.18  
37.54  
28.29  
24.84

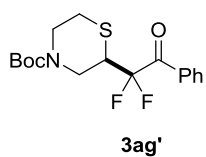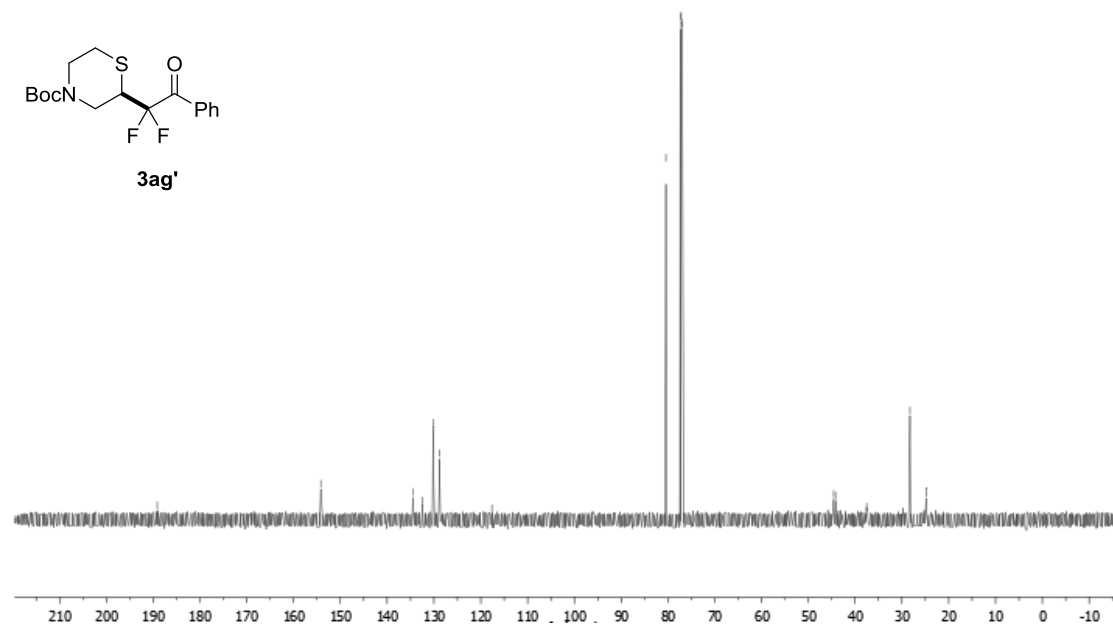

ZWZ-08-50O4(2ak)  
F19CPD

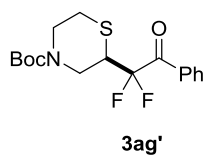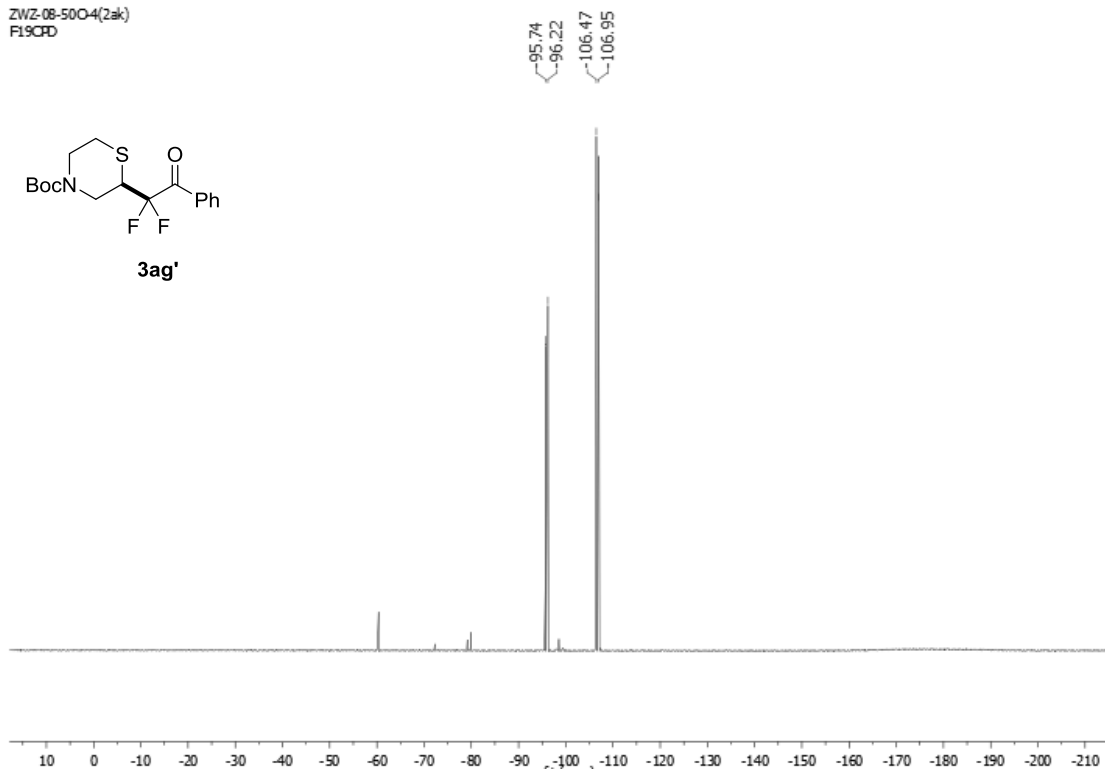

LWJ-03-Q2(3a')

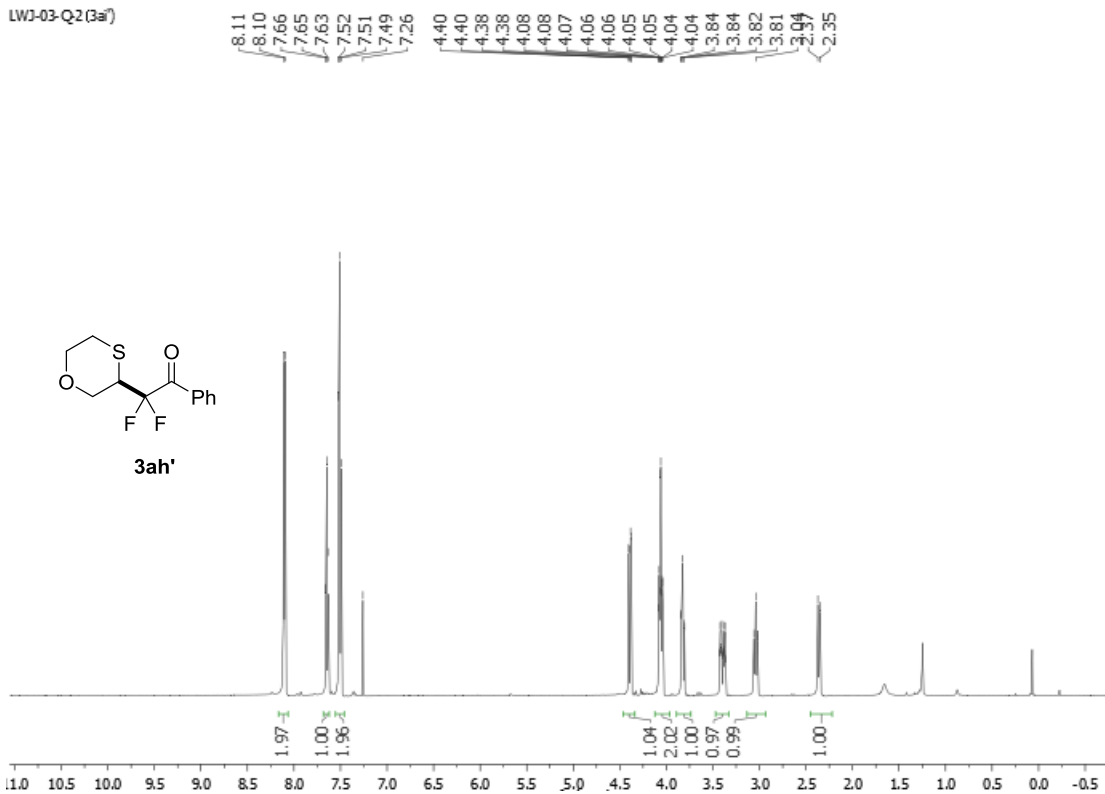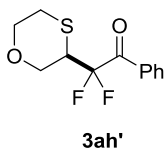

LWJ-03-Q2 (3a<sup>1</sup>)

189.45  
189.24  
189.05

134.52  
132.50  
130.25  
130.23  
130.20  
128.85  
120.93  
119.20  
117.48

77.37  
77.16  
76.95  
68.18  
66.29  
66.27

-37.54

-24.95

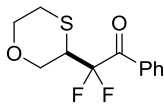

3ah'

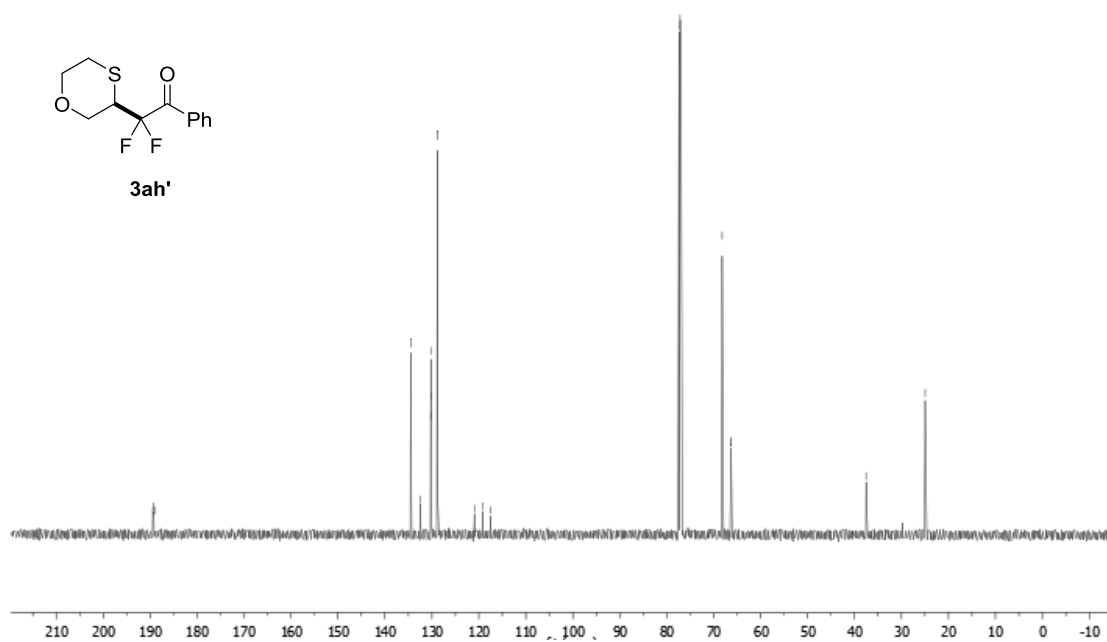

LWJ-03-Q2 (3a<sup>1</sup>)

95.93  
96.43  
104.66  
105.16

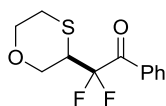

3ah'

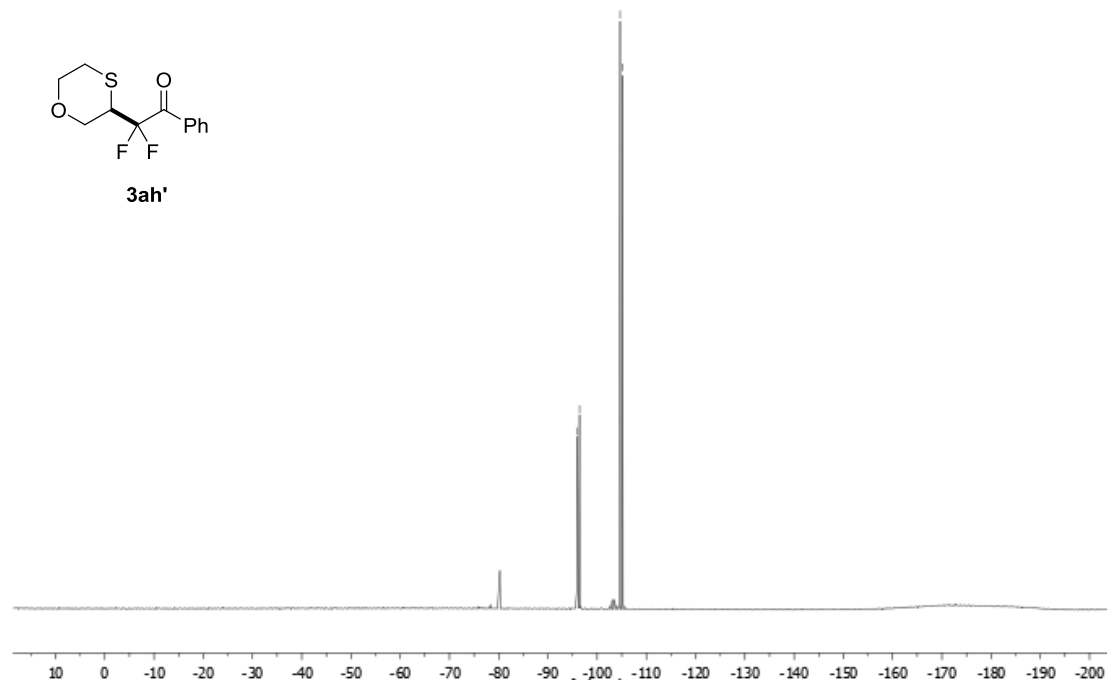

ZWZ-08-93E-1(2an)  
1H NMR

8.06  
7.66  
7.66  
7.66  
7.65  
7.64  
7.63  
7.52  
7.50  
7.50  
7.49  
7.49  
7.26  
4.06  
4.06  
4.05  
4.04  
4.03  
4.02  
4.01  
3.23  
3.22  
3.01  
3.00  
2.99  
2.98  
2.88  
2.87  
2.86  
2.85  
2.83  
2.82  
2.81  
2.80  
2.76  
2.74  
2.73  
2.72  
2.71

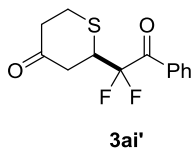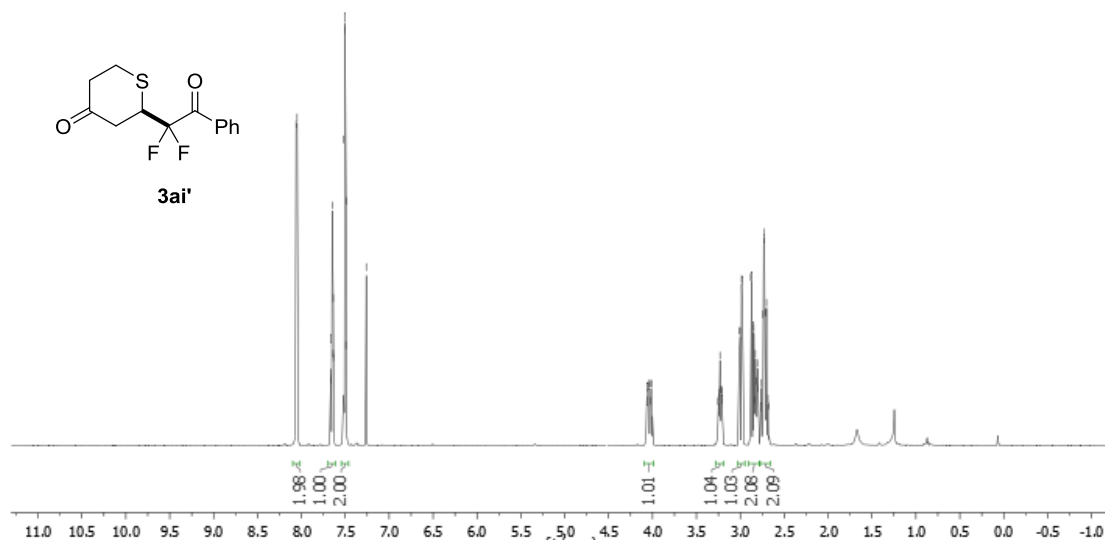

ZWZ-08-98E-1(2an)  
13C NMR

205.69  
190.16  
188.42  
188.22  
134.69  
132.32  
130.10  
130.08  
130.05  
128.95  
120.76  
119.03  
117.30  
77.37  
77.16  
76.95  
43.67  
43.52  
43.36  
42.30  
40.01  
39.99  
39.97  
26.77  
26.75

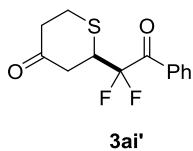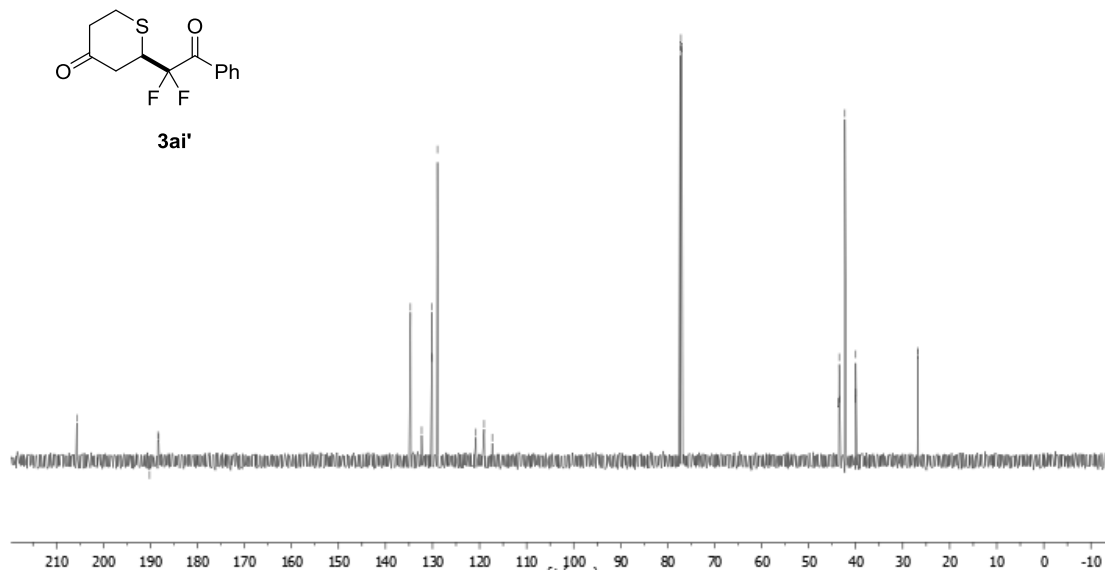

ZWZ-08-93E-1(2an)  
F19CPD

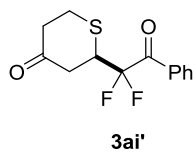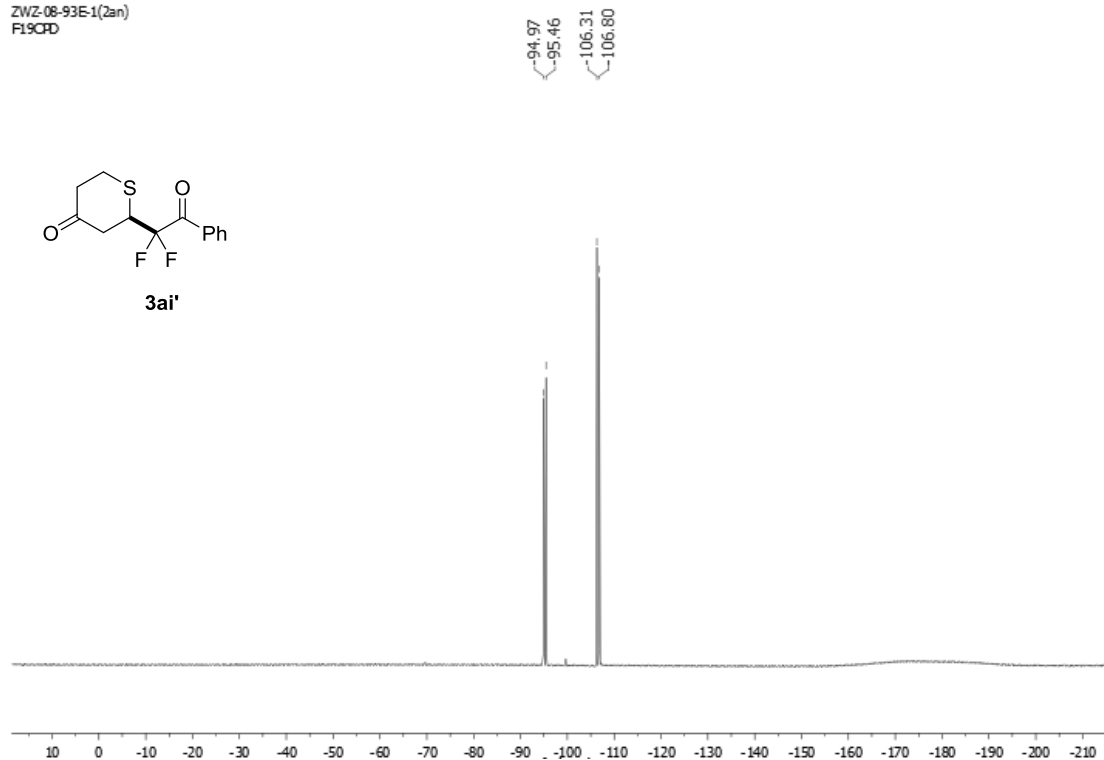

ZWZ-08-501-2(2ag)  
1H NMR

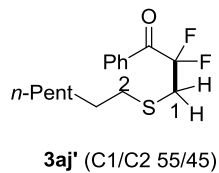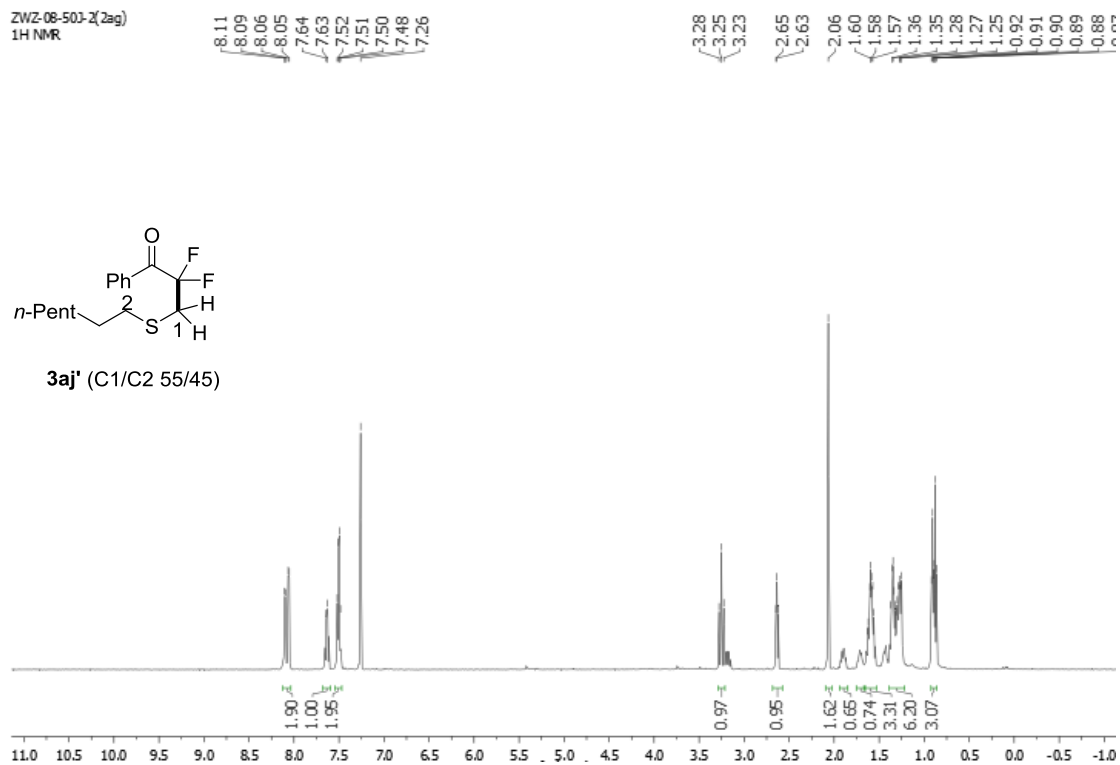



ZYG-04-20  
13C NMR

190.63  
190.40  
190.19  
189.41  
189.21  
189.00

134.50  
134.11  
130.24  
130.22  
130.20  
129.96  
129.94  
128.83  
128.77  
121.40  
120.34  
119.67  
118.65  
117.96  
116.96

77.37  
77.16  
76.95  
71.37  
69.75

48.58  
35.03  
33.81  
31.52  
31.47  
31.29  
29.36  
28.47  
26.37  
26.30  
22.64  
22.61  
14.25  
14.15

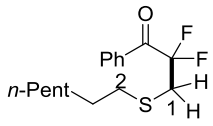

3aj' (C1/C2 55/45)

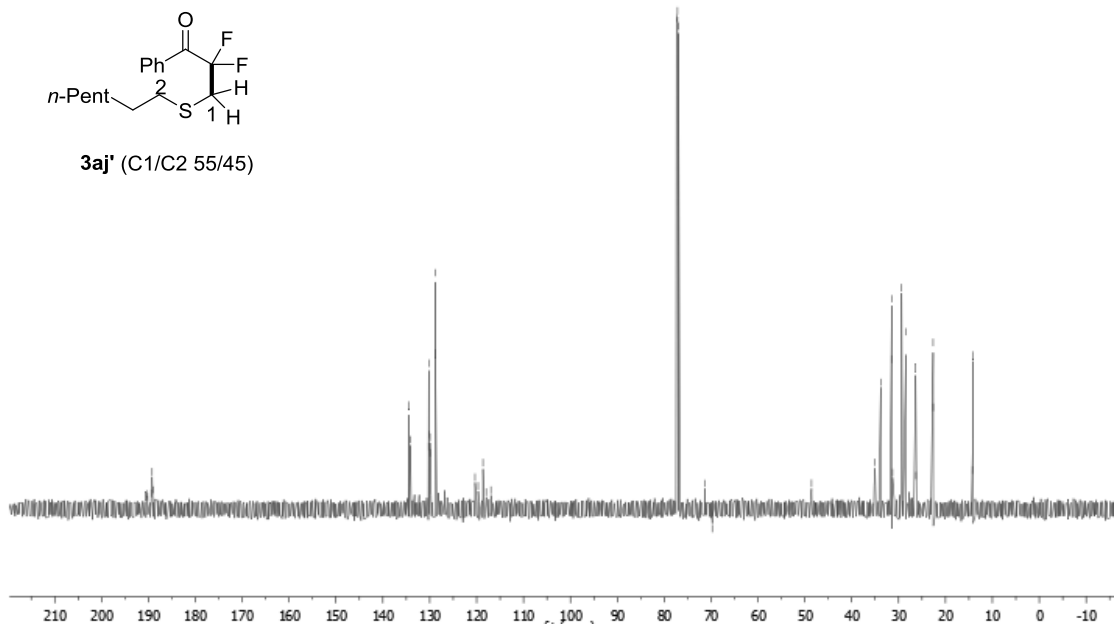

ZYG-04-20  
F19CPD

-95.22  
-95.70  
-97.62  
-107.93  
-108.41

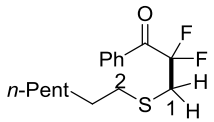

3aj' (C1/C2 55/45)

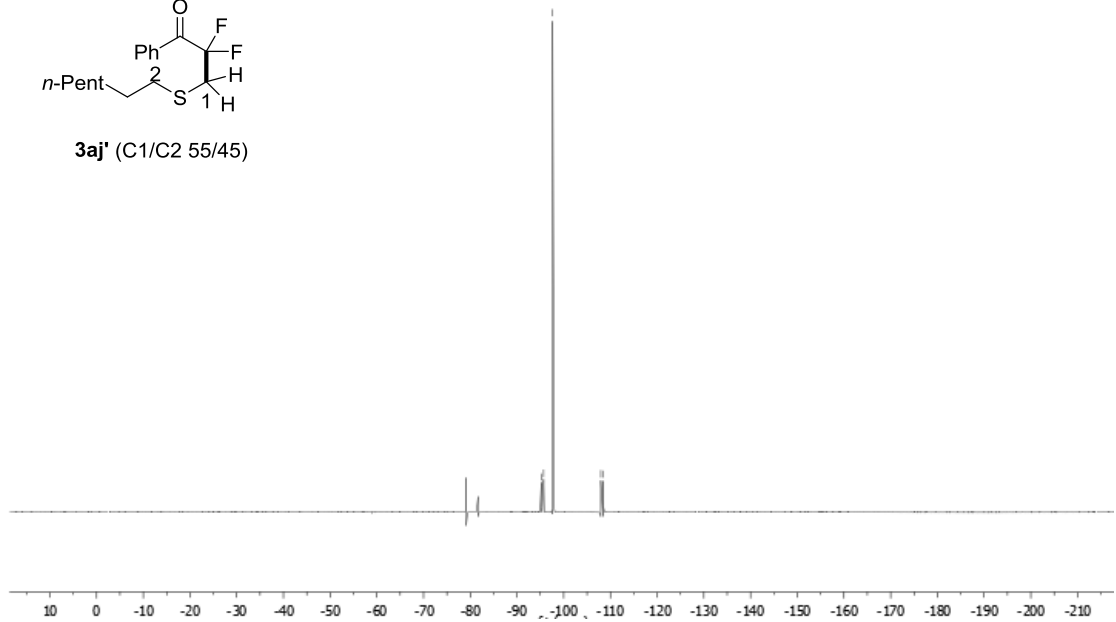

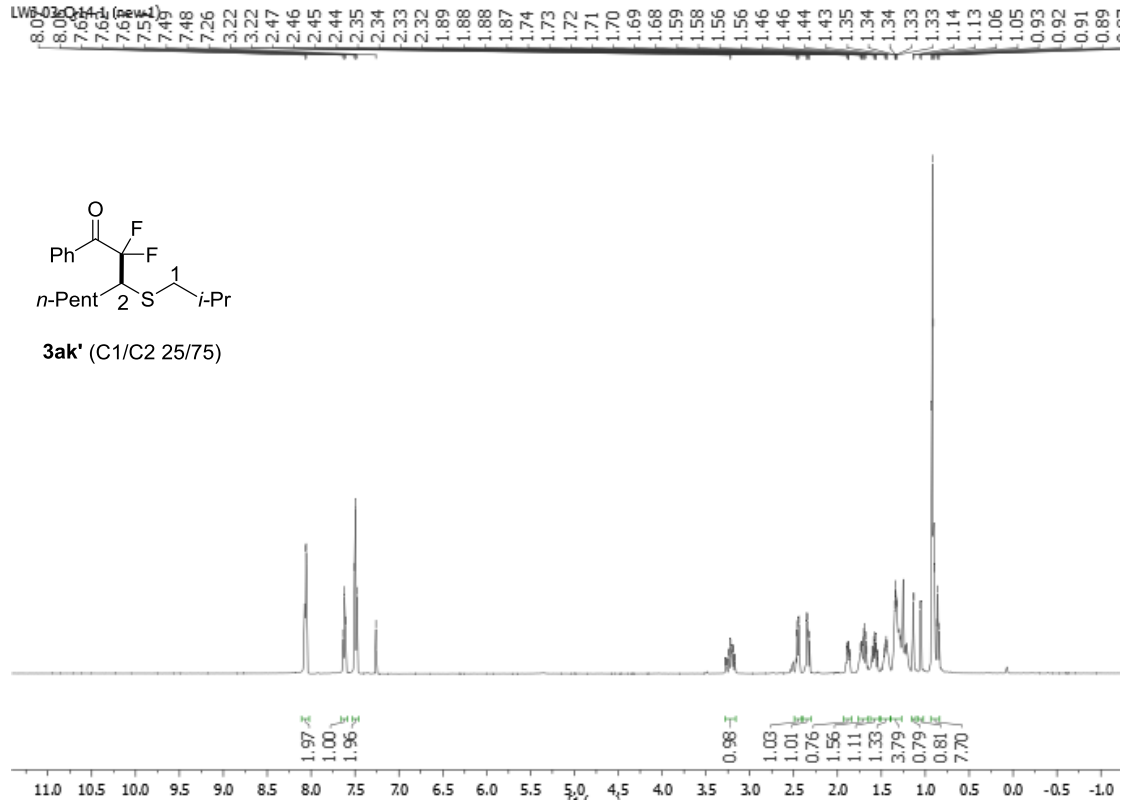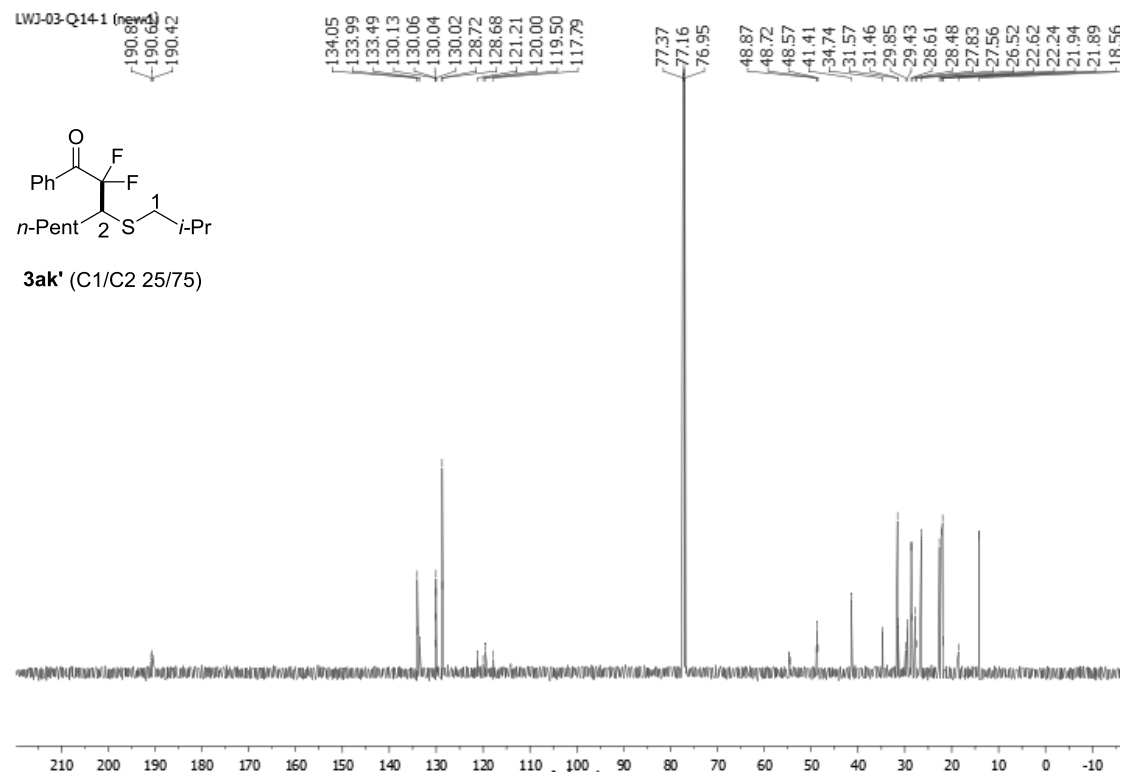

LWJ-03-Q14-1 (new-1)

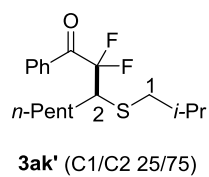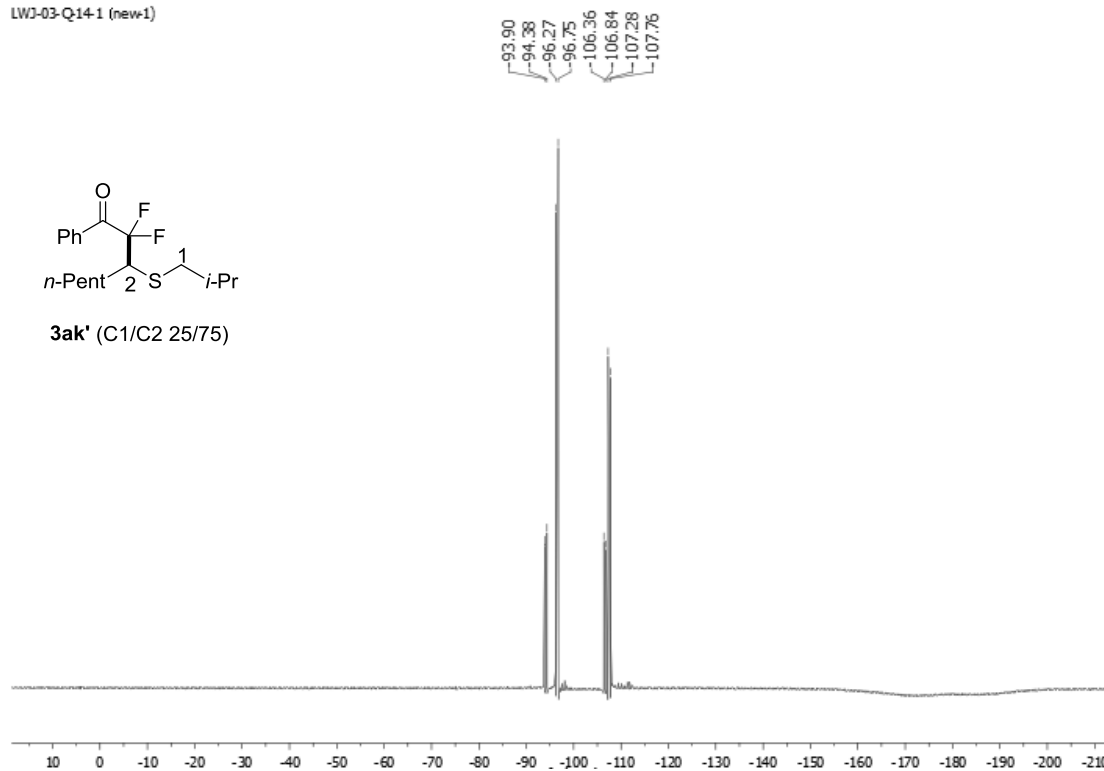

LWJ-03-Q18

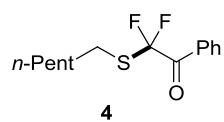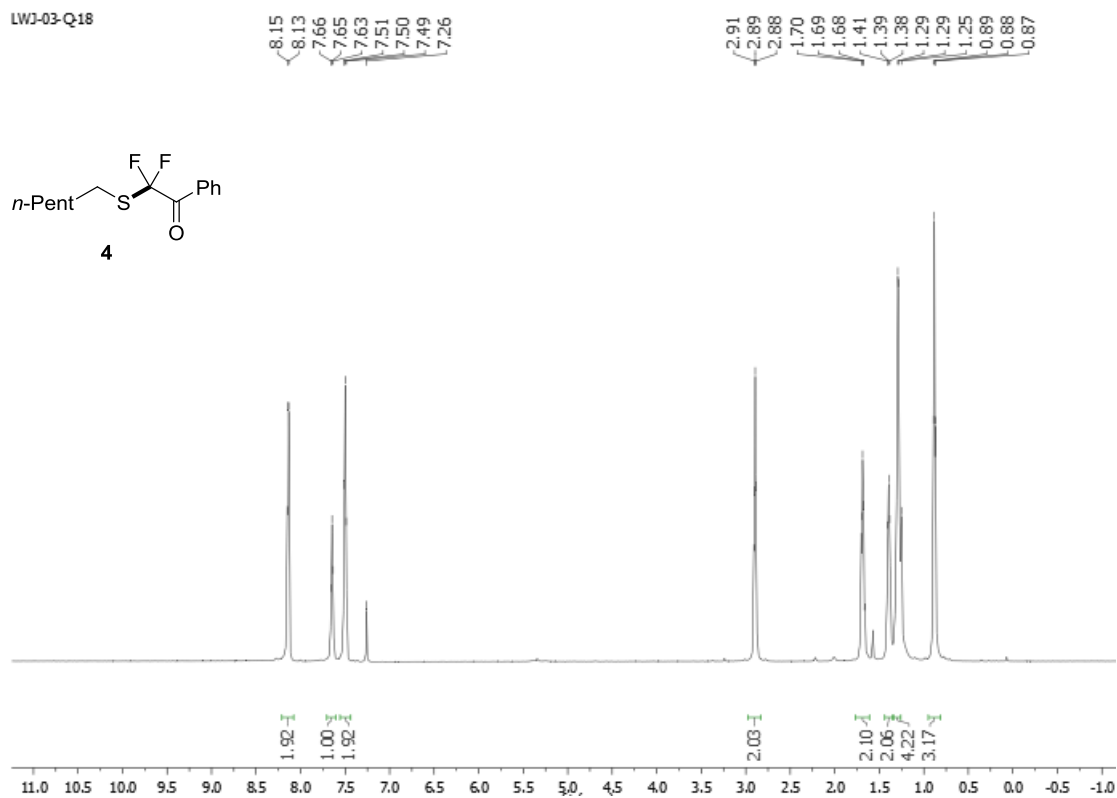

LWJ-03-Q18

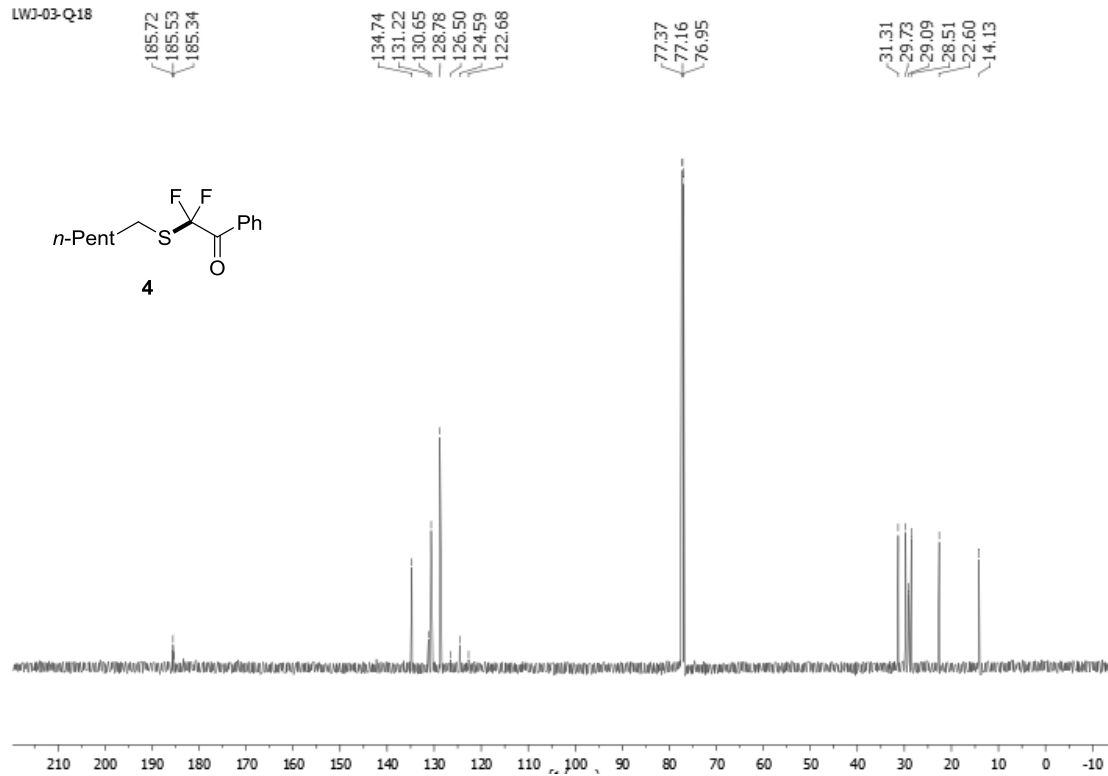

LWJ-03-Q18

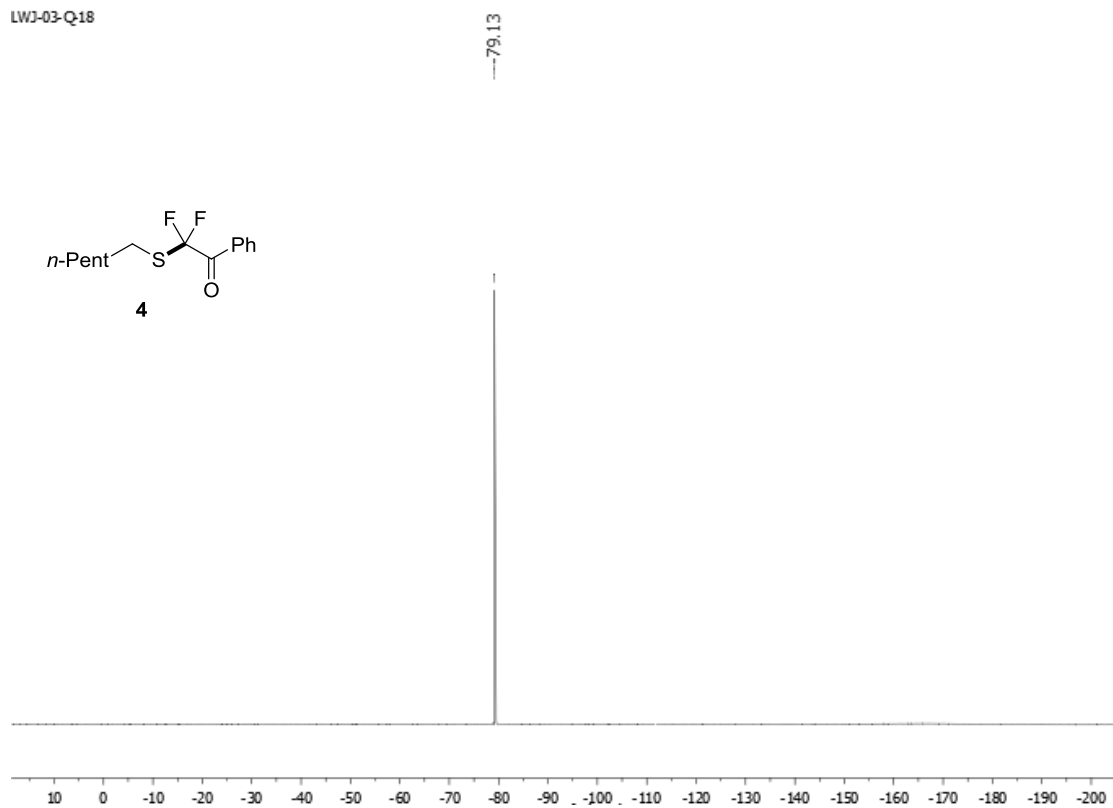

ZYG-04-28B +++  
1H NMR

7.86  
7.85  
7.35  
7.34  
7.34  
7.28  
7.27  
7.27  
7.26  
7.24  
7.22  
4.46  
4.44  
4.43  
4.41  
3.83  
3.80  
3.64  
3.62  
-2.45

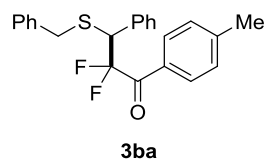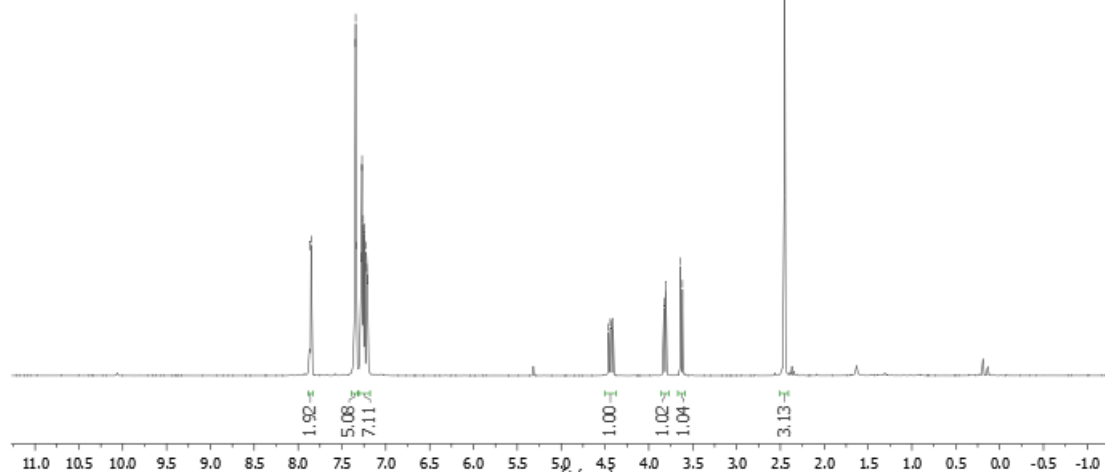

ZYG-04-28B +++  
13C NMR

188.94  
145.32  
136.63  
134.33  
130.31  
130.11  
130.09  
130.07  
129.96  
129.43  
129.28  
129.27  
129.26  
128.59  
128.57  
128.51  
127.42  
119.99  
118.27  
116.55  
77.37  
77.16  
76.95  
51.61  
51.45  
51.31  
36.64  
21.90

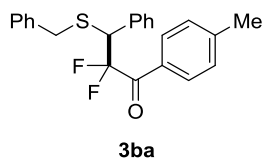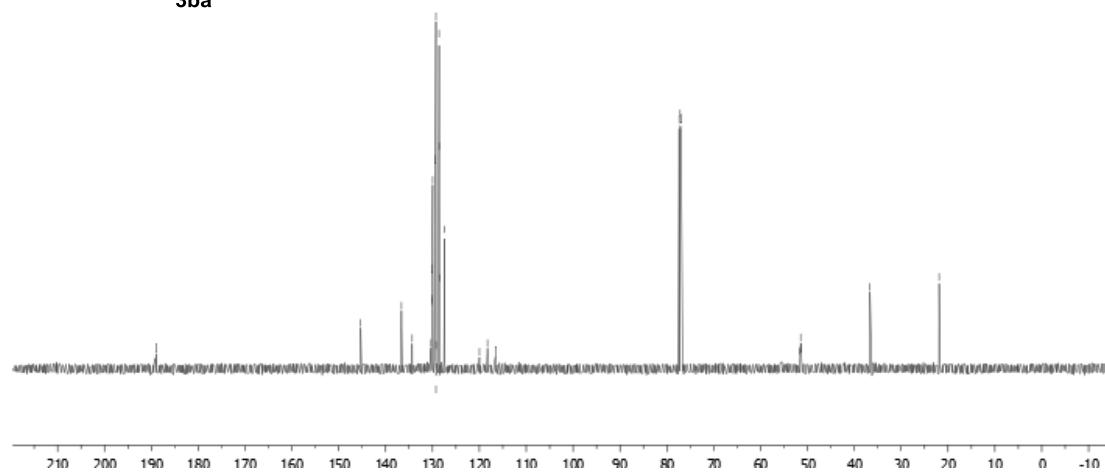

ZYG-04-28B  
F19CPD

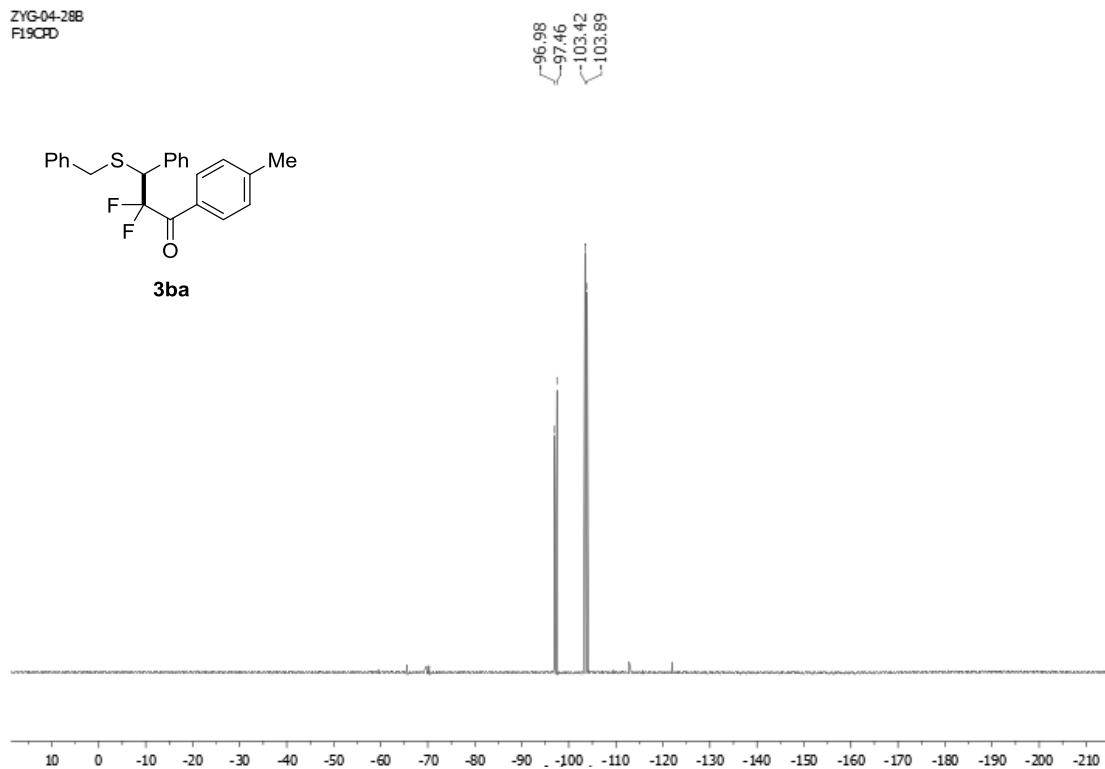

ZYG-04-28A S  
1H NMR

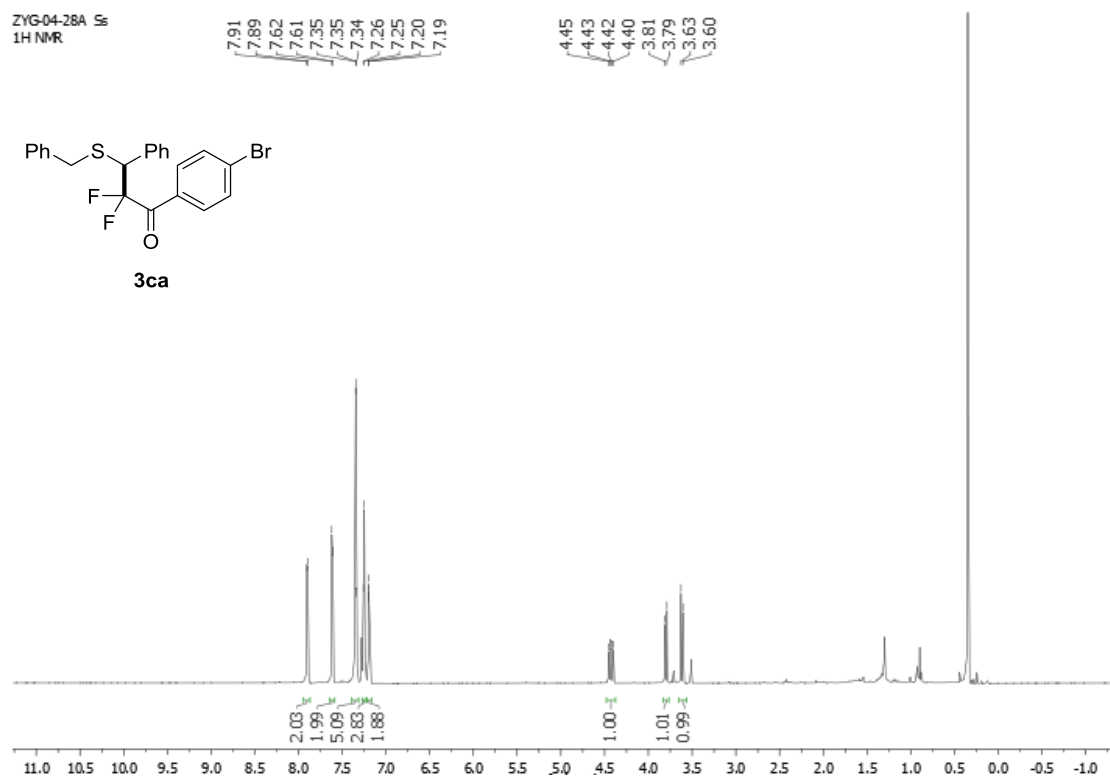

ZYG-04-28A S6  
13CNMR

189.74

148.81

136.58

134.30

133.57

132.92

130.01

129.27

128.72

128.70

128.68

128.60

128.59

128.54

127.47

77.57

77.16

76.95

51.48

51.32

51.17

36.64

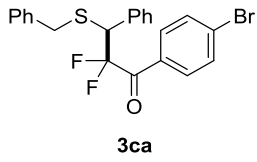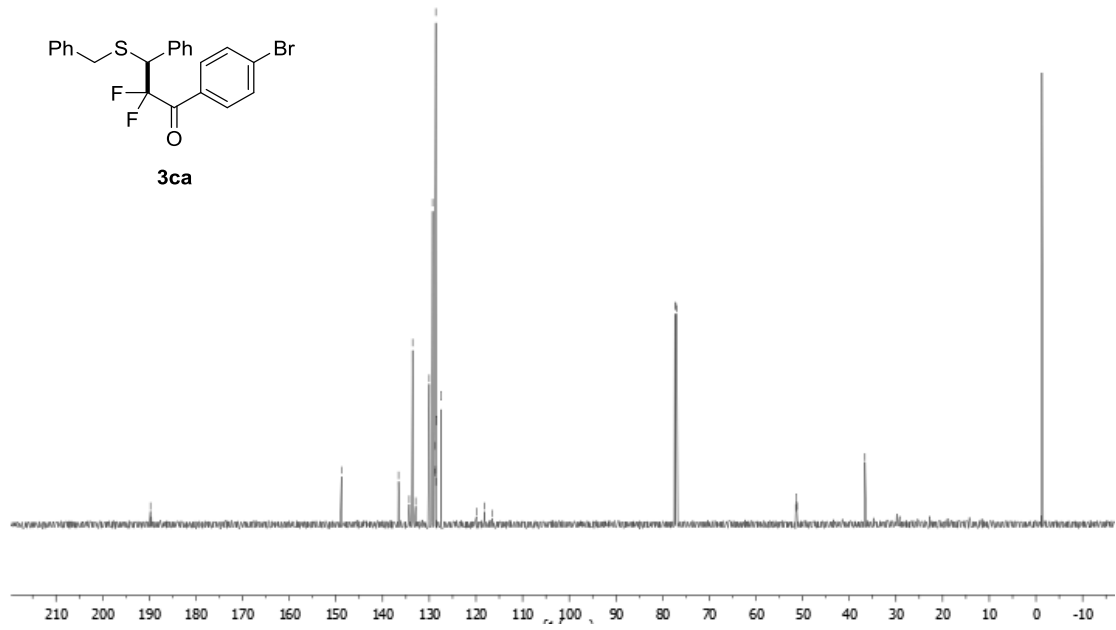

ZYG-04-28A  
F19CFD

95.35

95.83

104.19

104.67

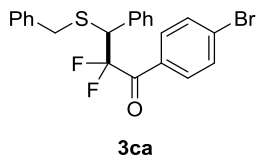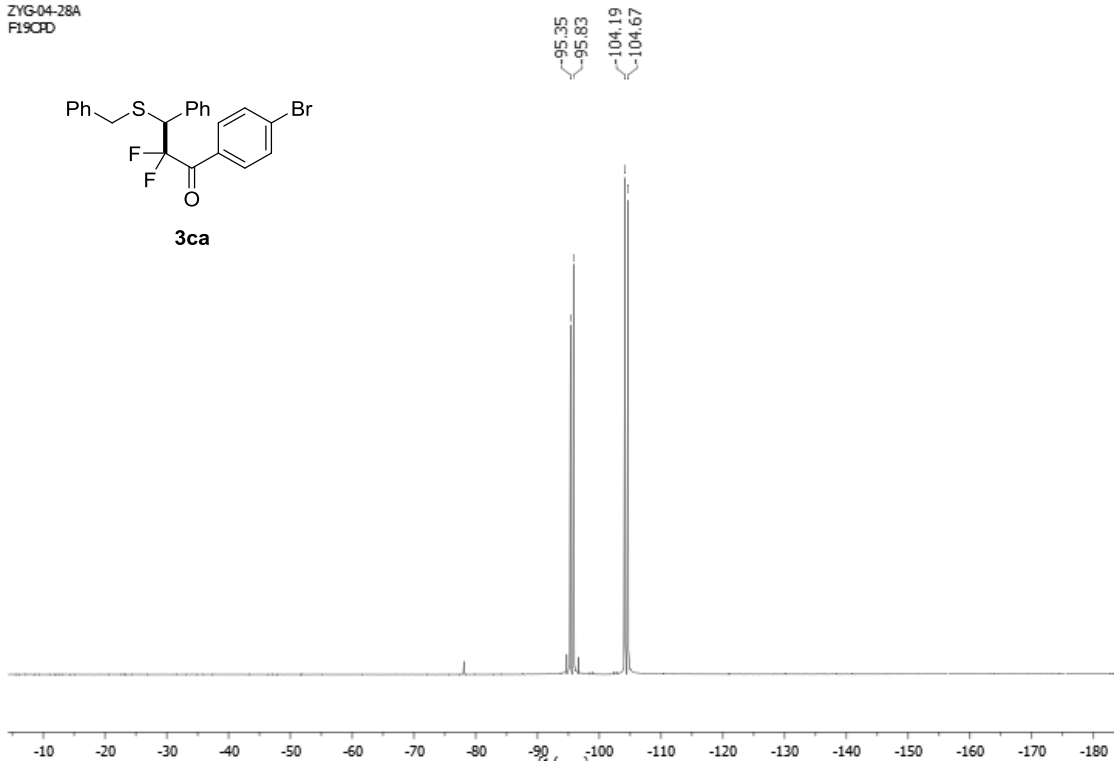

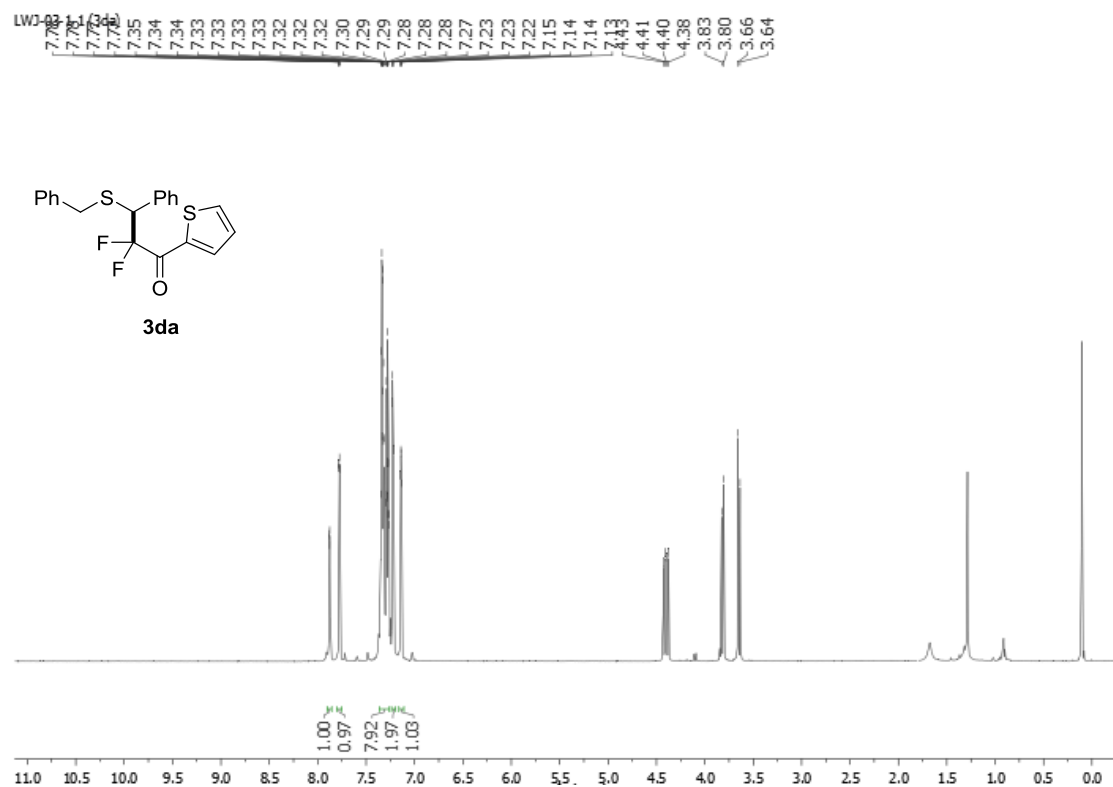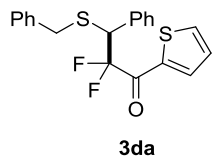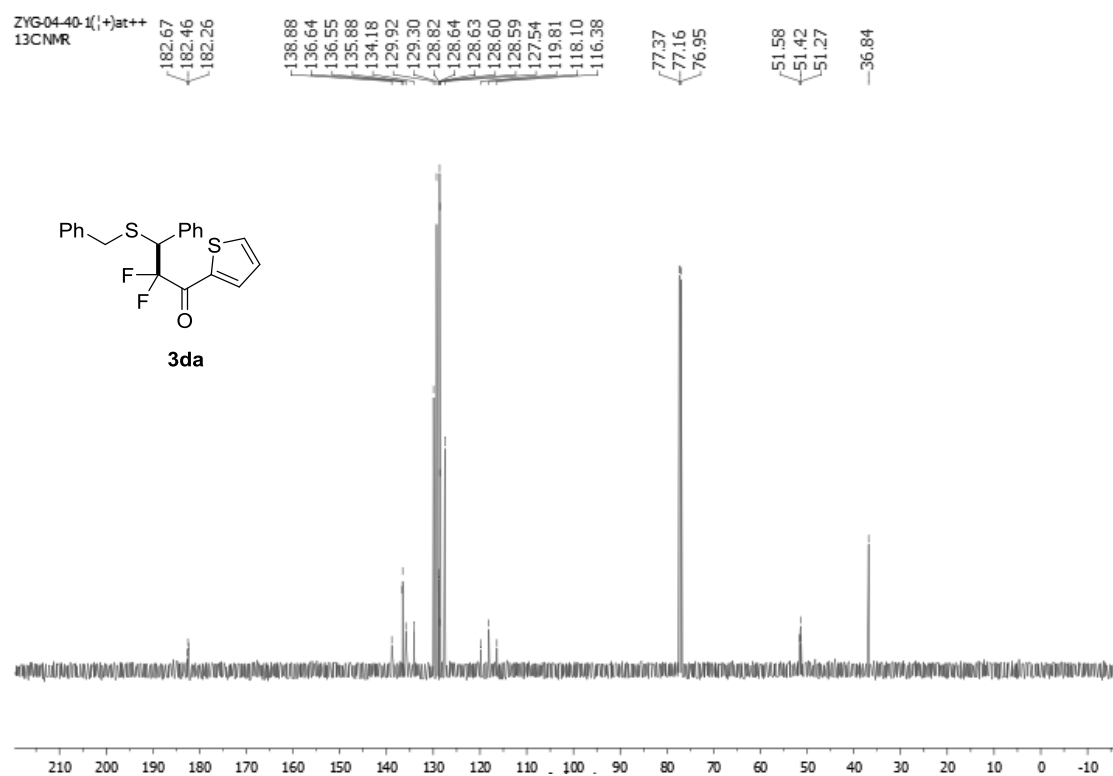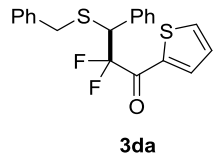



LW3-03-1-1 (3da)

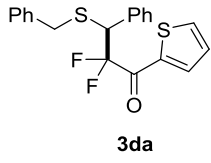

98.10  
98.57  
105.53  
105.99

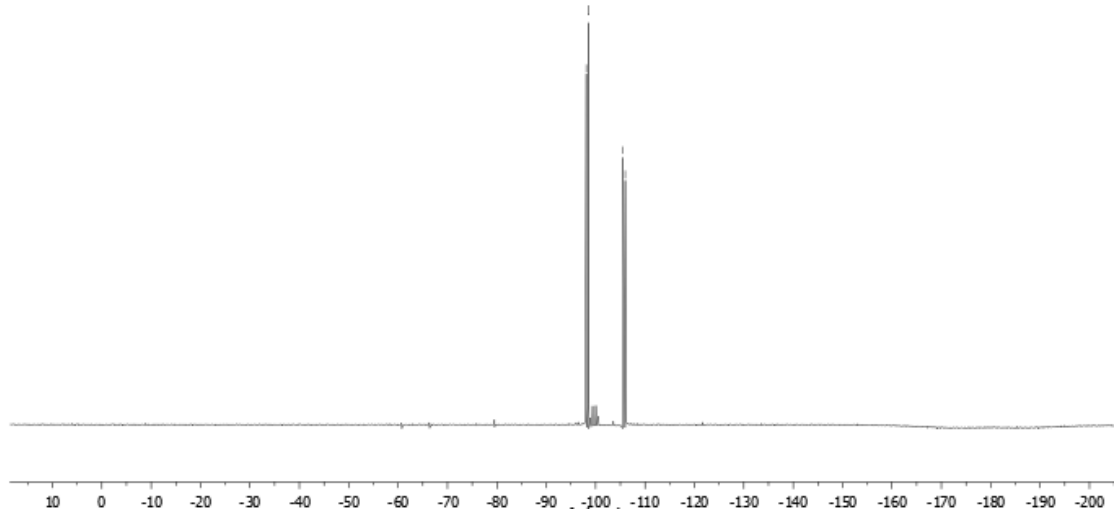

ZV6 04 13  
1H  
85.00  
79.94  
79.94  
78.88  
7.86  
7.58  
7.58  
7.57  
7.57  
7.48  
7.47  
7.45  
7.38  
7.37  
7.37  
7.35  
7.34  
7.34  
7.24  
7.24  
7.23  
7.23  
7.15  
7.15  
7.14  
7.13  
4.57  
4.55  
4.53  
3.81  
3.62  
3.60

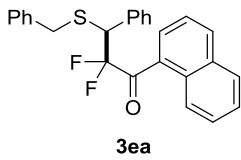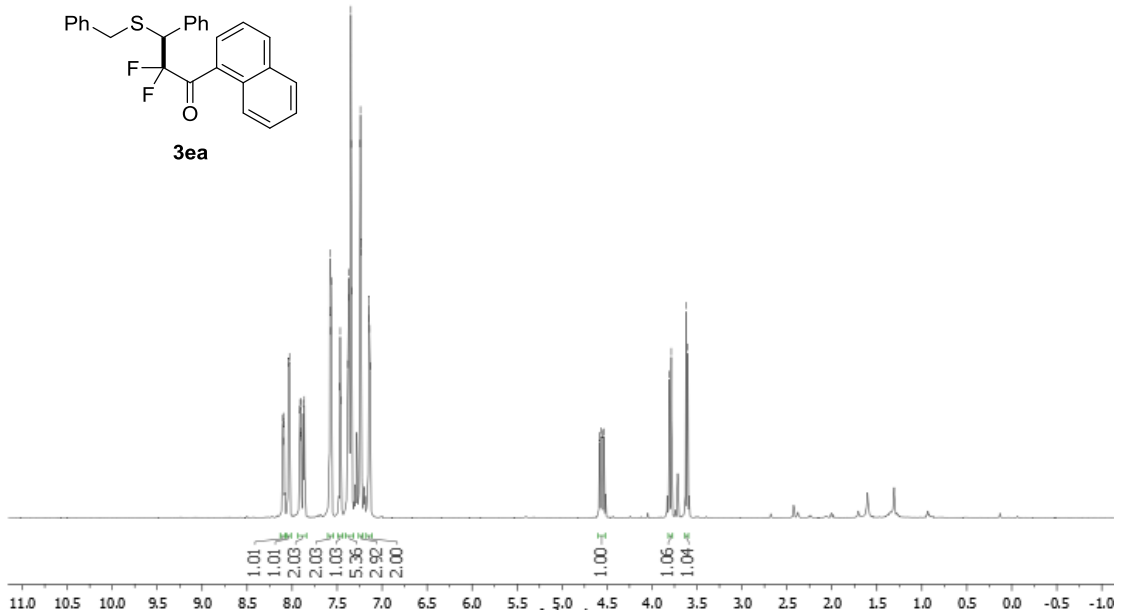

ZYG-04-43  
13CNMR

193.25  
193.03  
192.84  
136.42  
134.19  
133.88  
133.47  
131.08  
130.75  
130.13  
129.22  
129.09  
128.72  
128.64  
128.59  
128.58  
128.57  
128.56  
128.16  
128.13  
127.50  
127.12  
126.73  
125.36  
124.08  
117.57  
117.50  
77.16  
76.95

51.47  
51.31  
51.16  
36.67

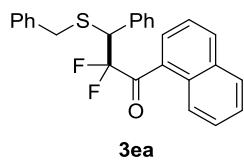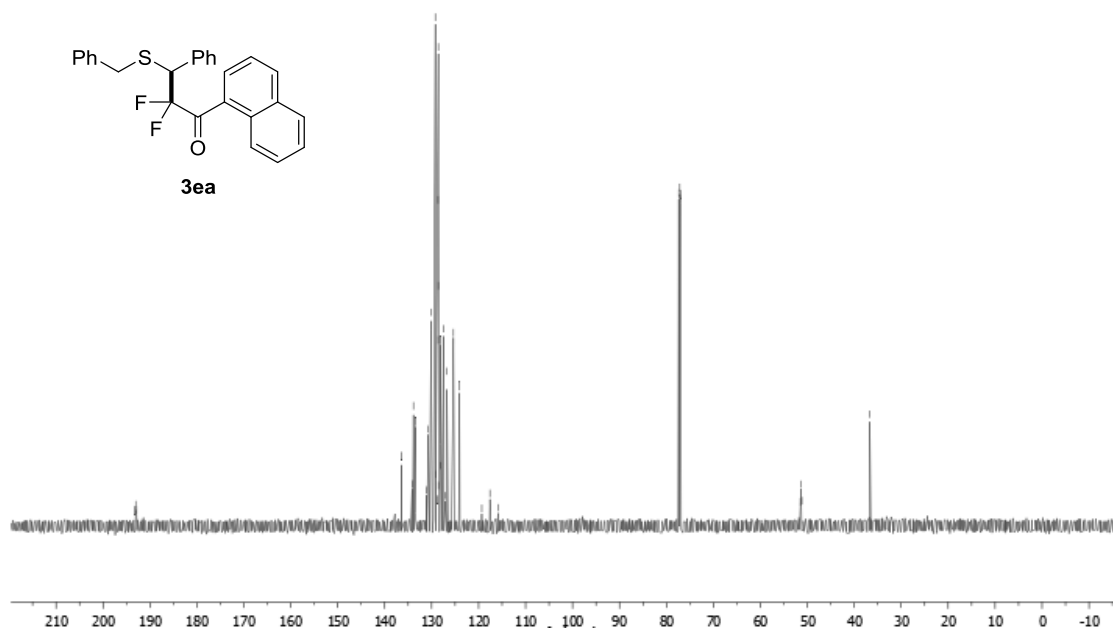

ZYG-04-43  
F19CFD

95.25  
95.71  
104.78  
105.25

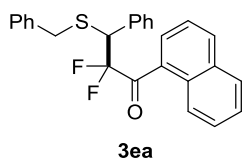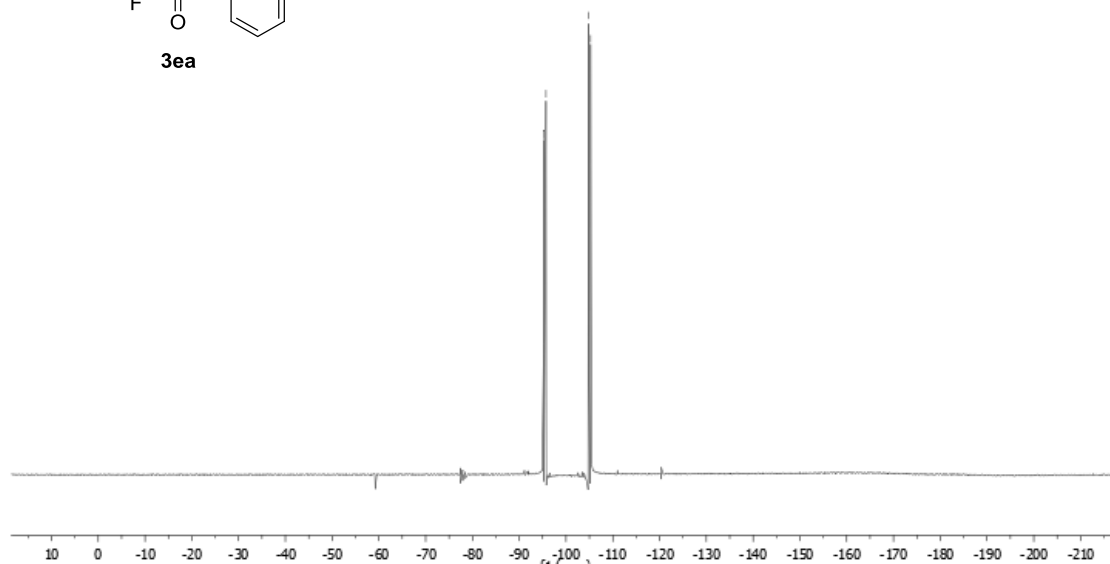

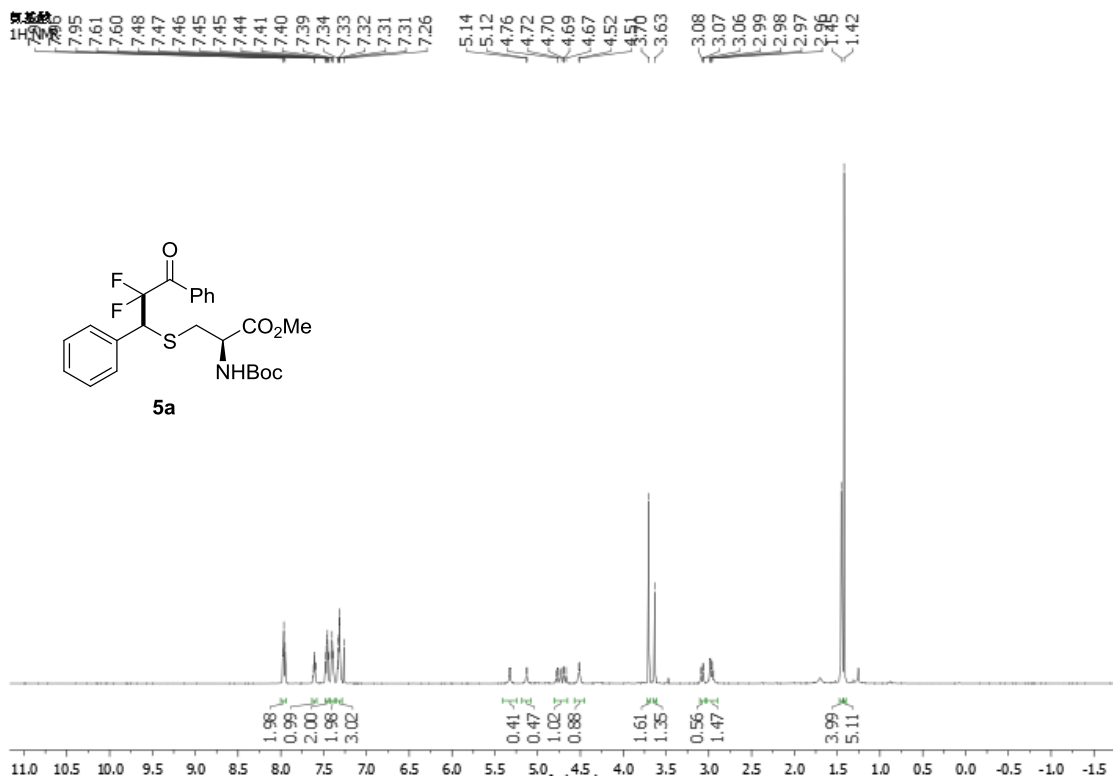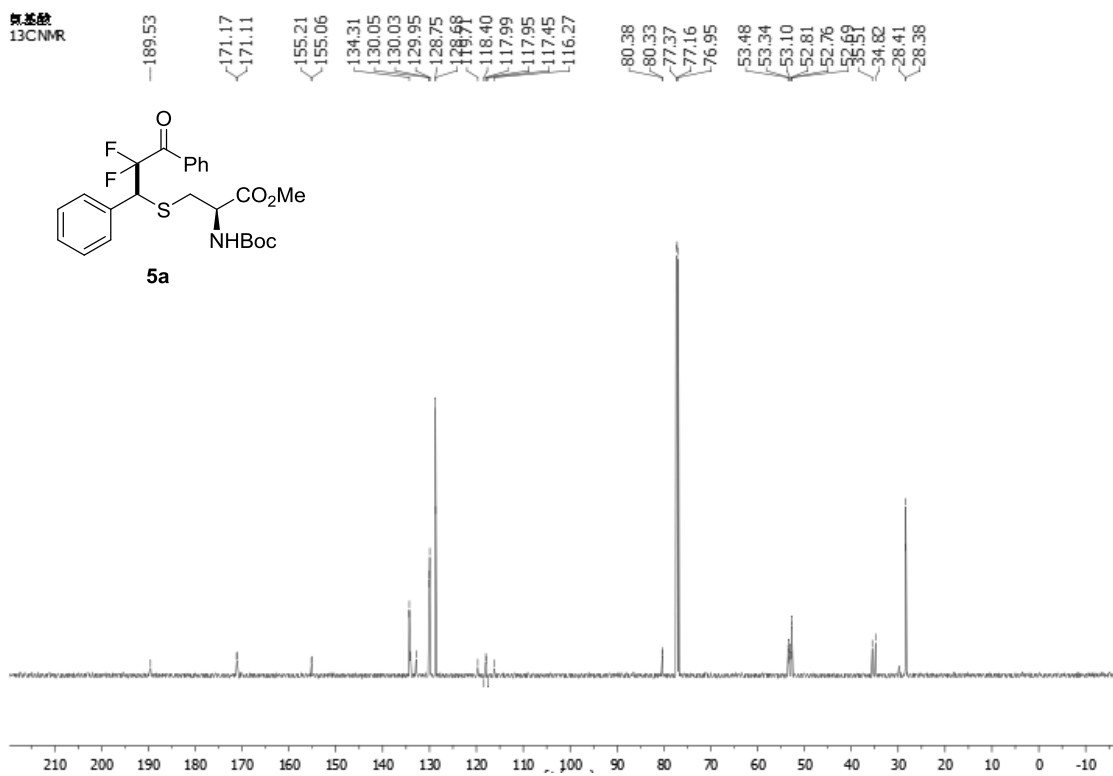

氨基酸  
F19CPD

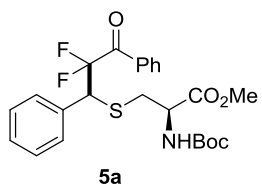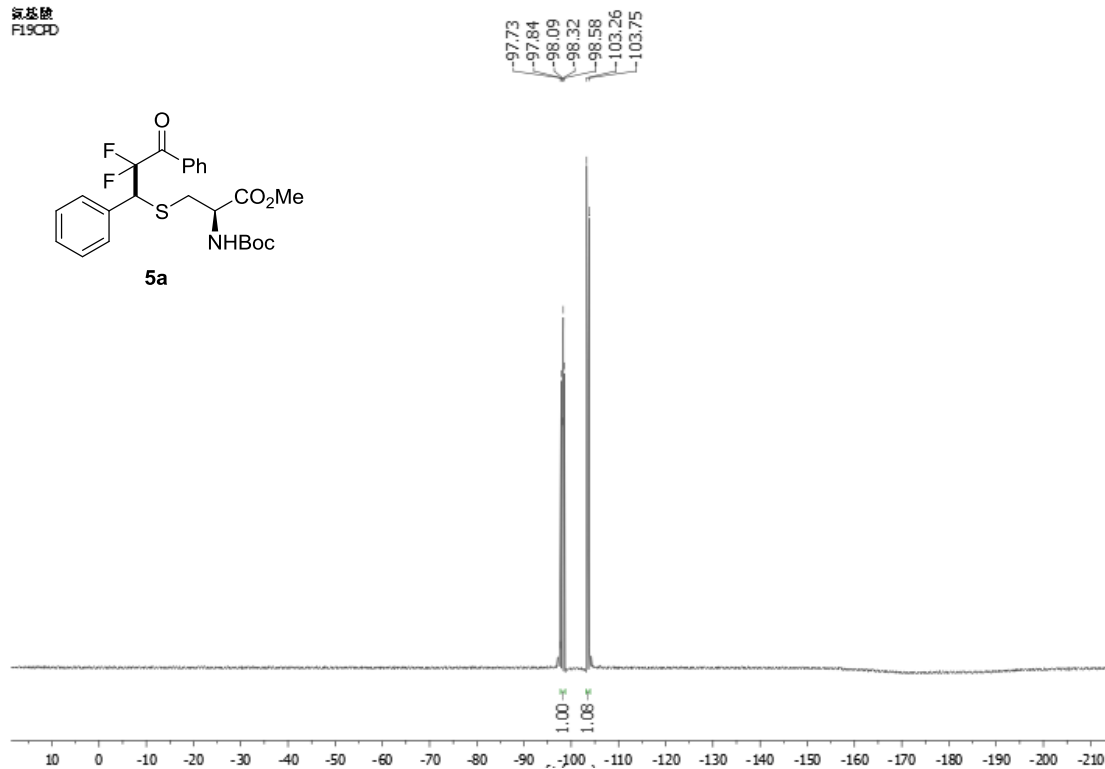

氨基酸  
H  
7.53  
7.51  
7.48  
7.46  
7.40  
7.39  
7.38  
7.38  
7.37  
7.36  
7.35  
7.35  
7.34  
7.33  
7.32  
7.31  
7.30  
7.30  
7.26  
4.83  
4.81  
4.79  
4.77  
4.68  
4.64  
4.63  
4.59  
-2.48

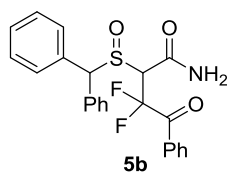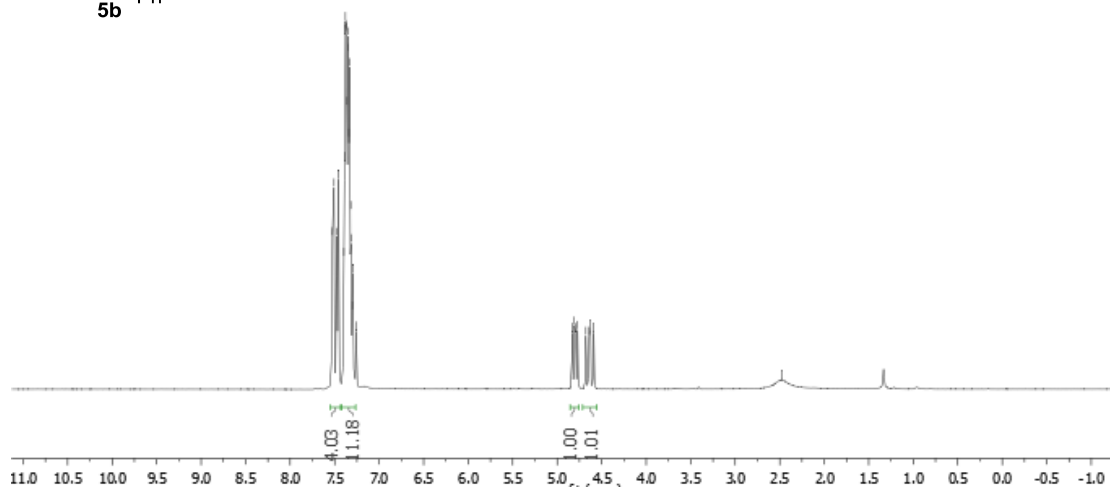

ZYG-04-3-2  
13CNMR

137.69  
137.65  
137.36  
137.34  
136.49  
129.78  
128.94  
128.76  
128.62  
128.36  
128.22  
127.56  
127.38  
124.48  
122.80  
121.13  
77.37  
77.16  
76.95  
74.15  
73.99  
73.96  
73.79  
54.86  
54.71  
54.56

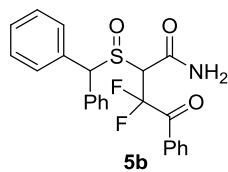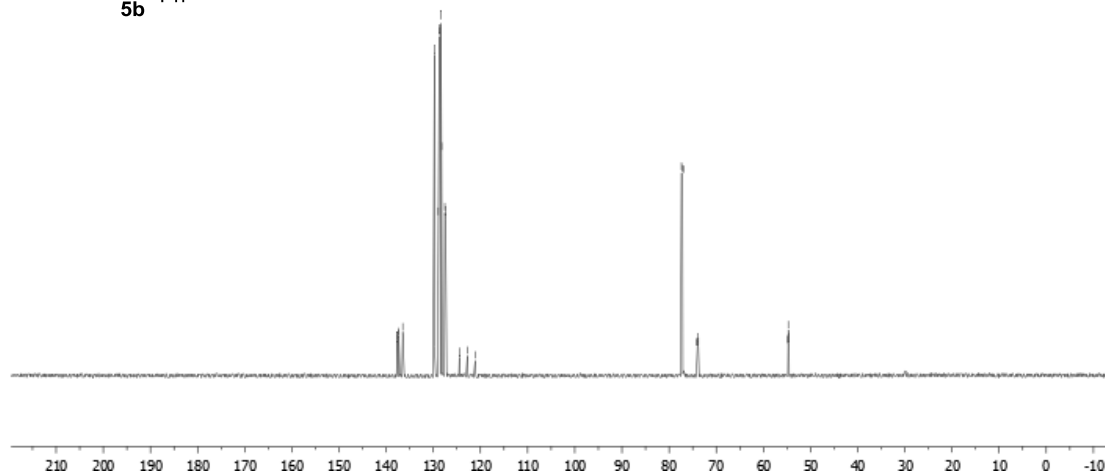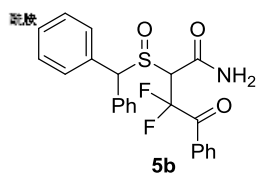

97.74  
98.26  
100.26  
100.38  
102.37  
102.89

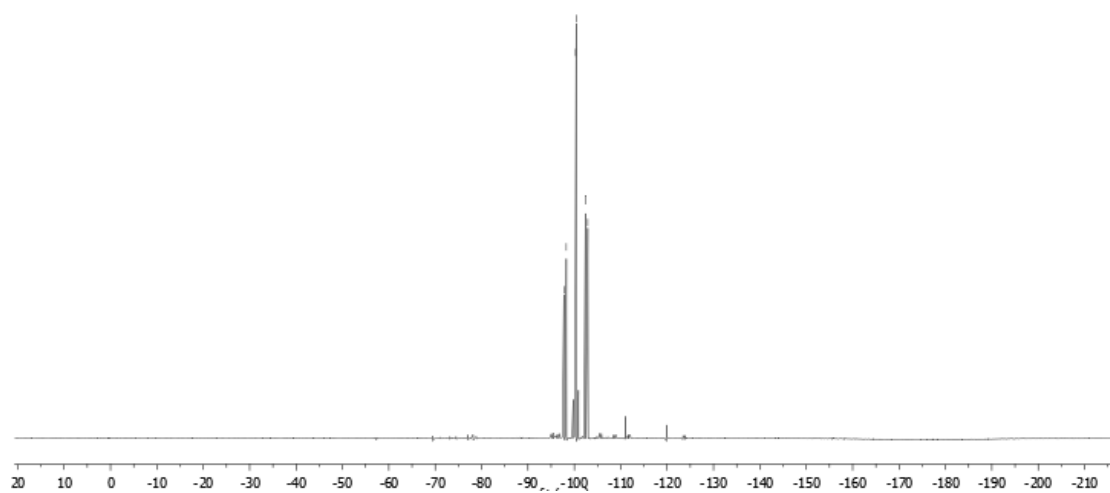

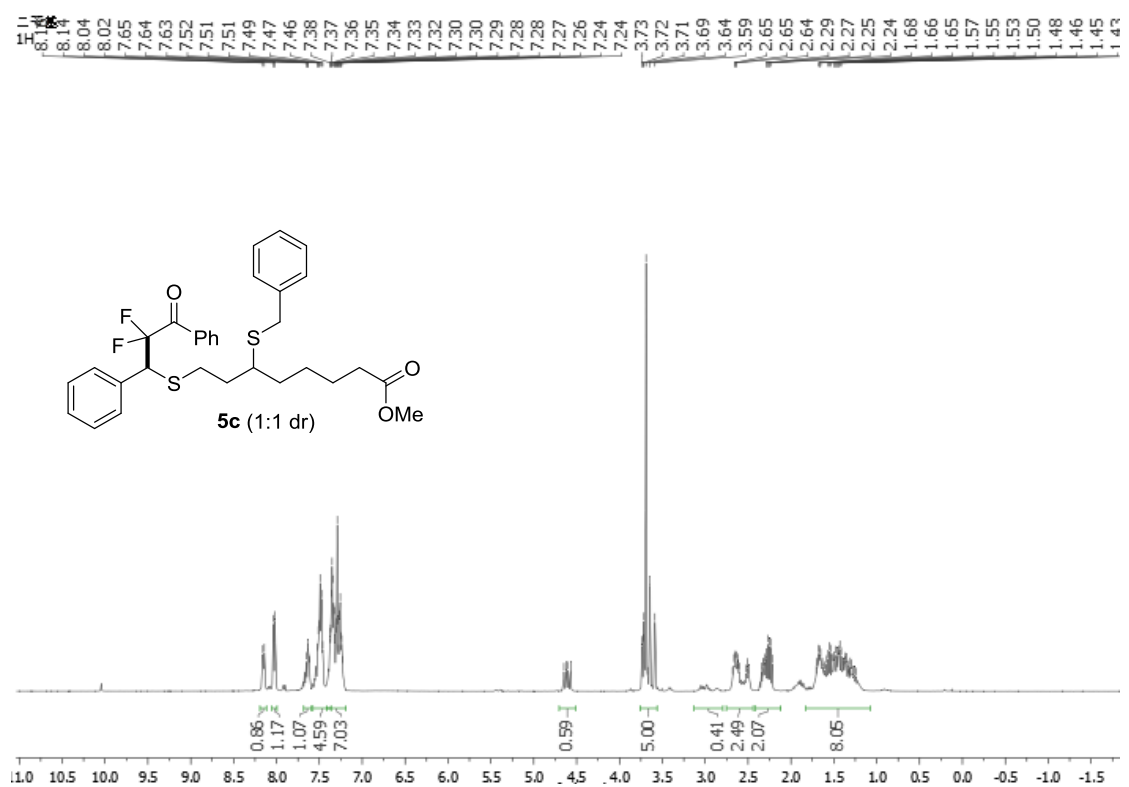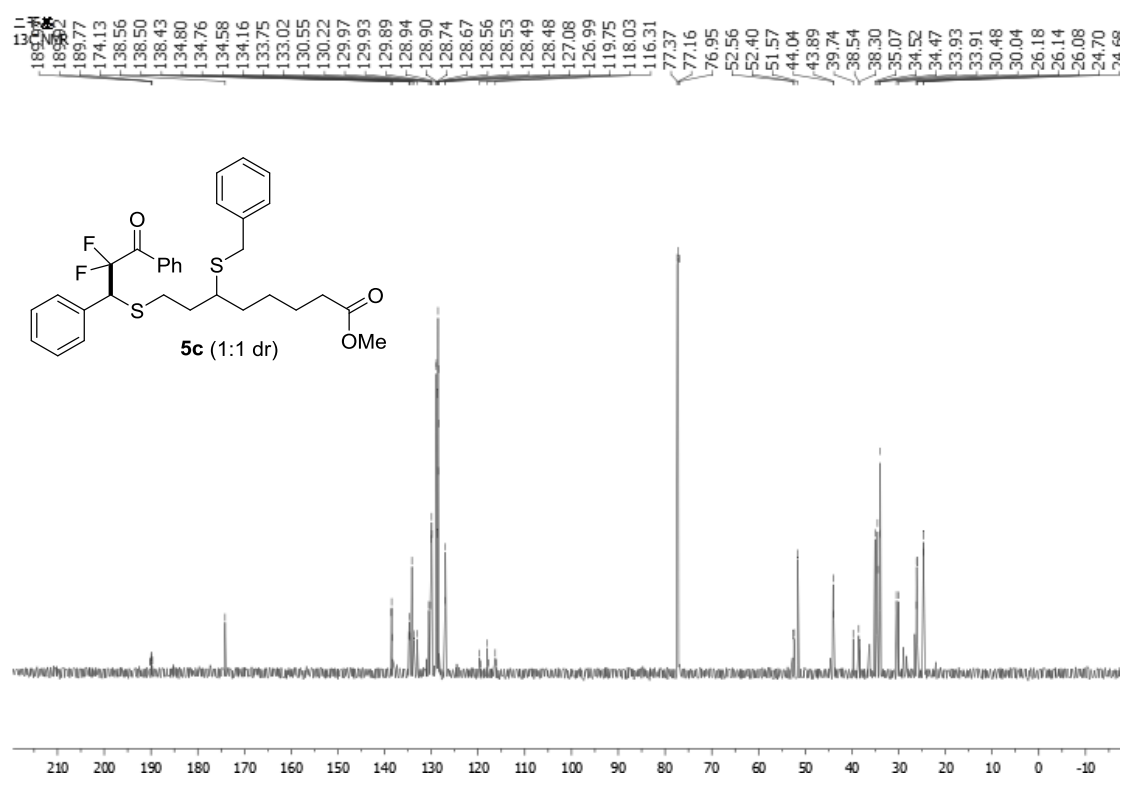

ZYG-03-75  
F19CPD

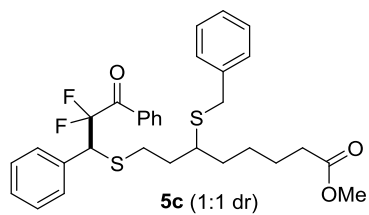

97.84  
98.09  
98.32  
98.58  
103.26  
103.75

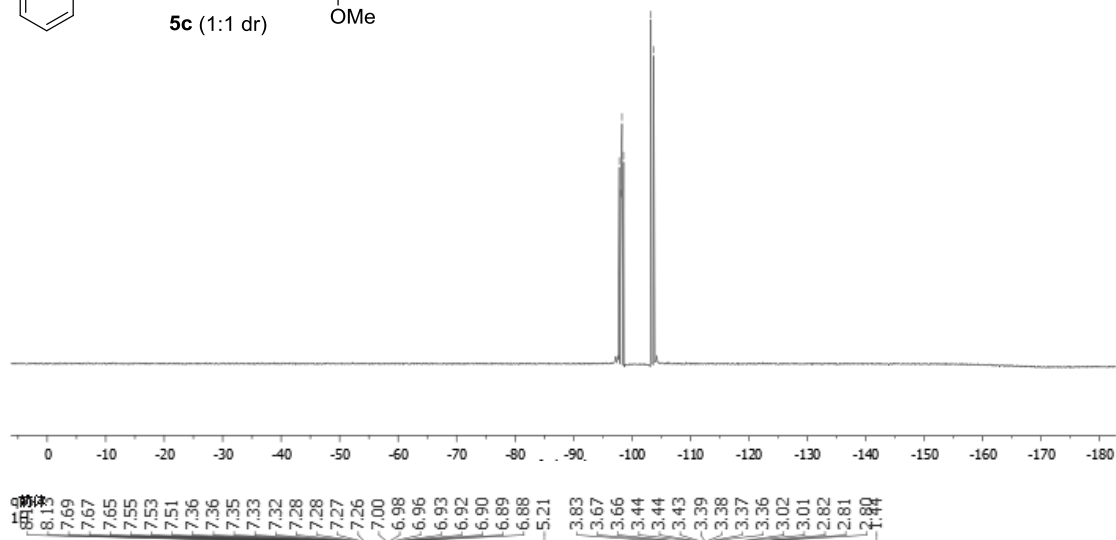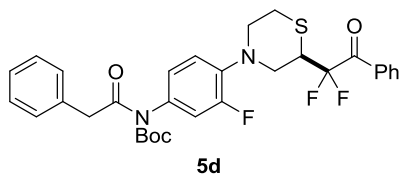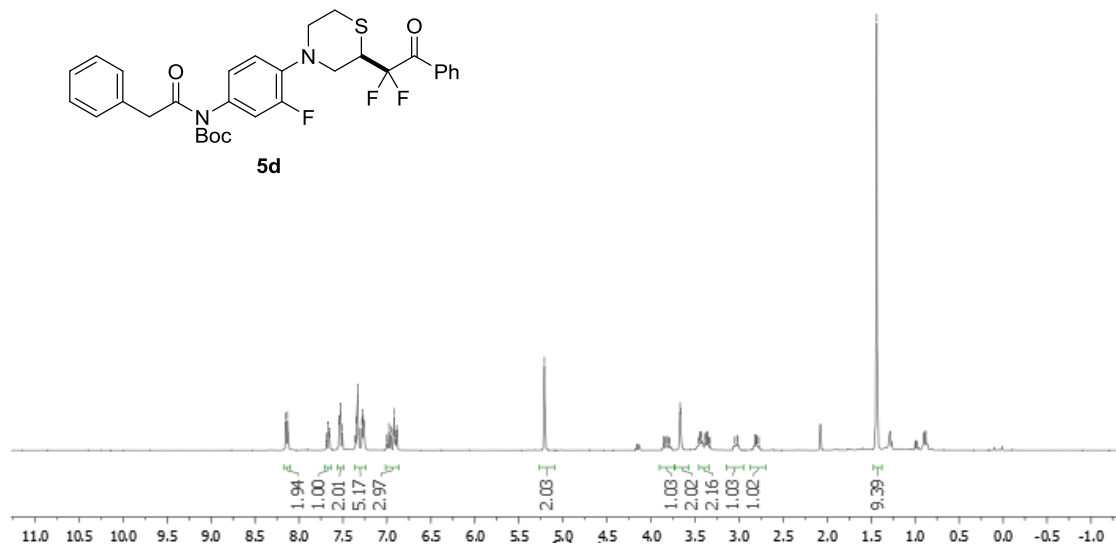

q前体  
13CNMR

189.20  
189.00  
188.80

155.99  
154.35  
153.01  
151.53

139.98  
135.39  
134.55  
132.43  
130.24  
128.85  
128.59  
128.40  
128.00  
124.37  
120.00  
116.75  
116.61  
83.85  
77.37  
77.16  
76.95  
68.48

52.27  
51.35  
41.33  
41.17  
41.02  
27.94  
26.93

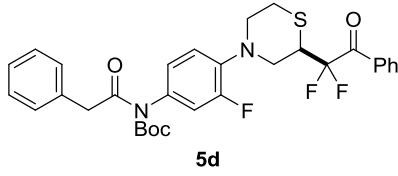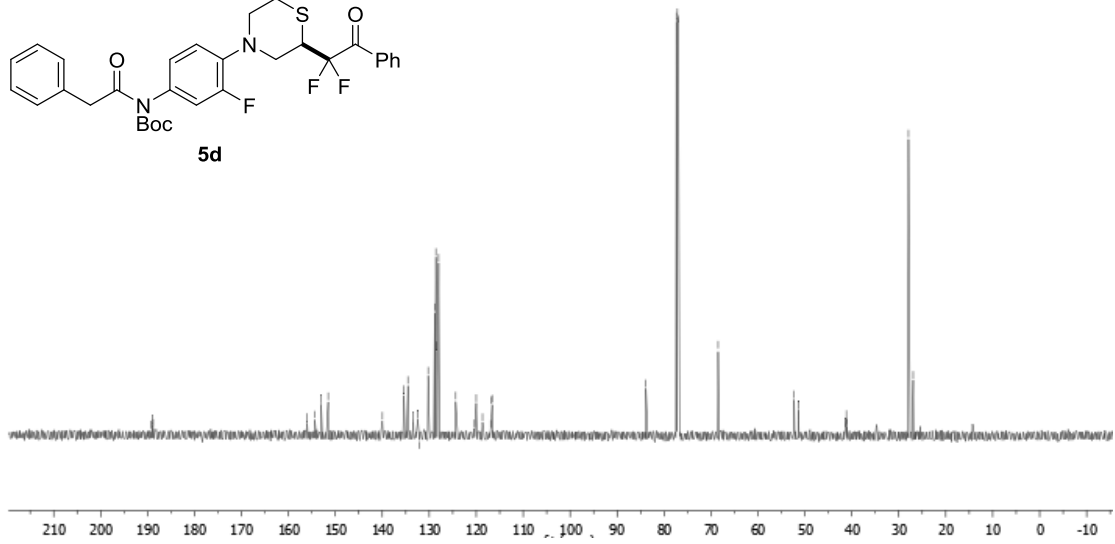

q前体  
F19CPD

95.08  
95.56  
105.60  
106.08

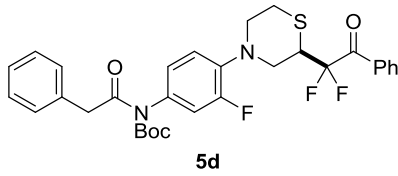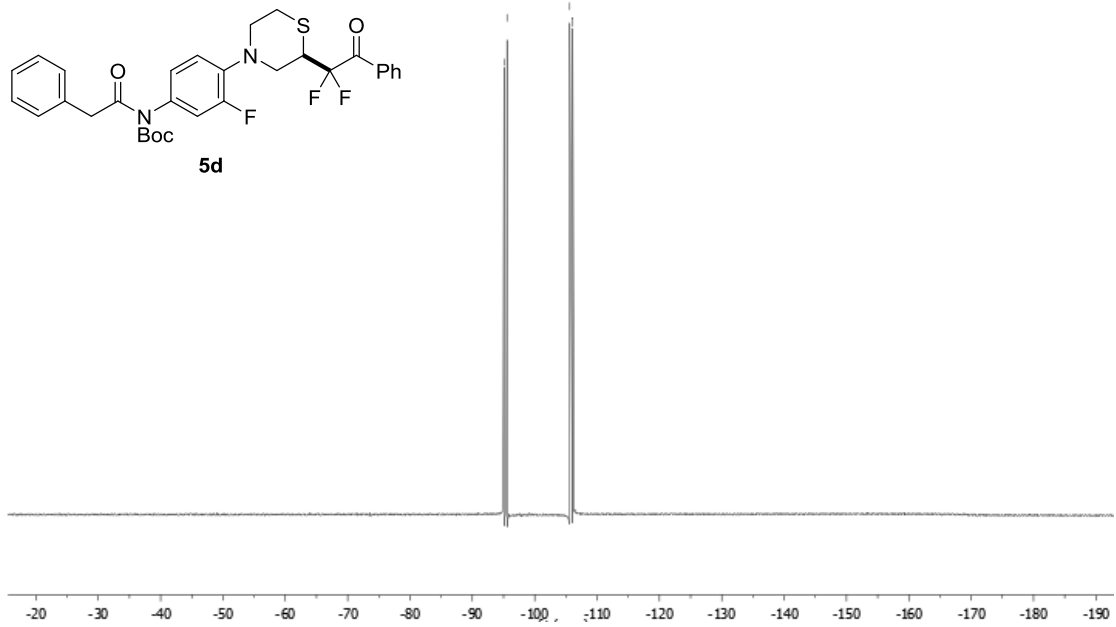



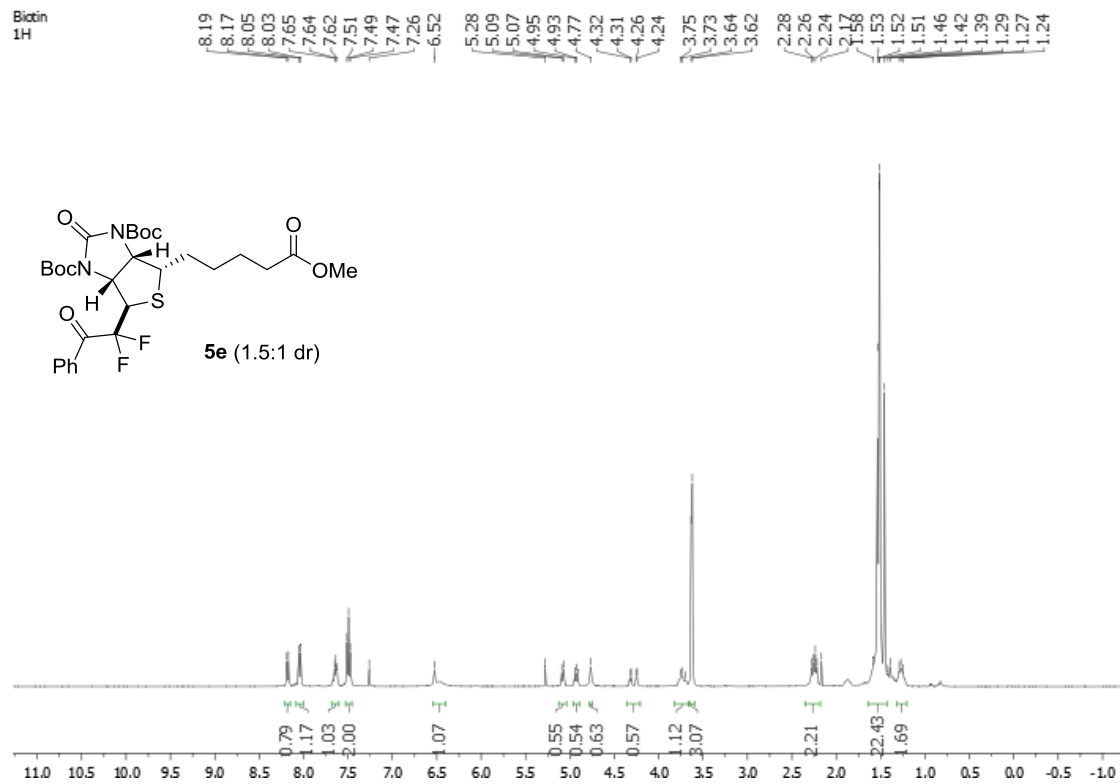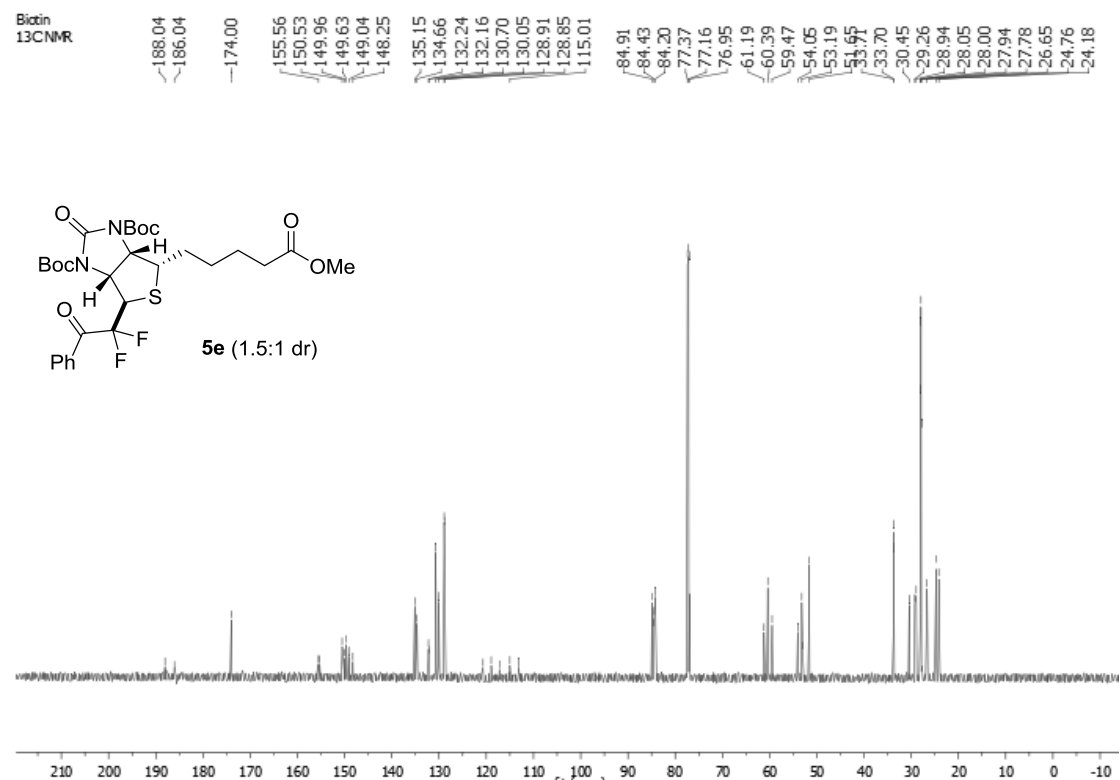

Biotin  
F19CPD

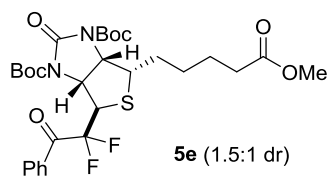

95.74  
96.25  
96.91  
97.43  
104.90  
105.29  
105.40  
105.80

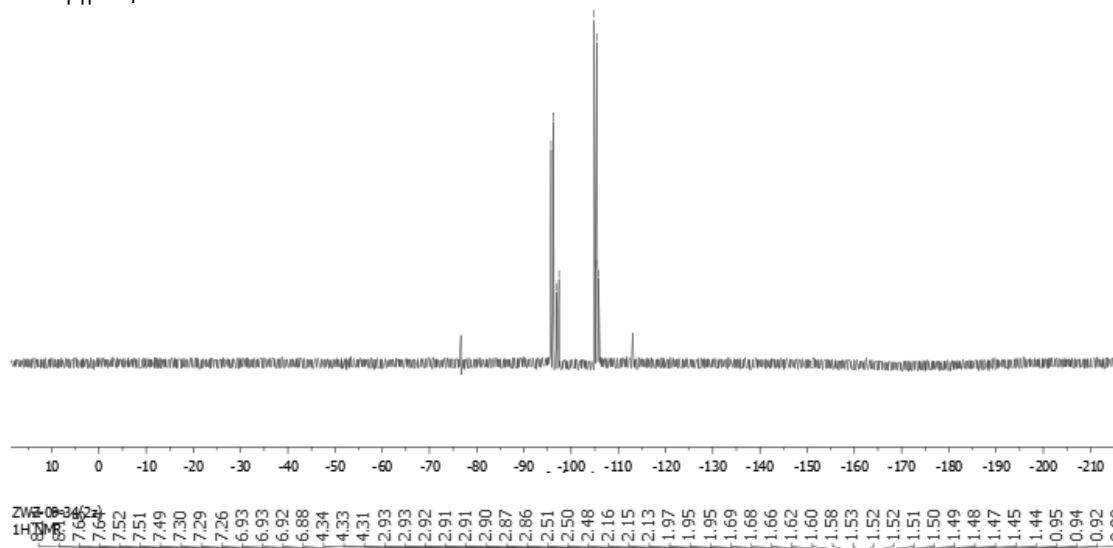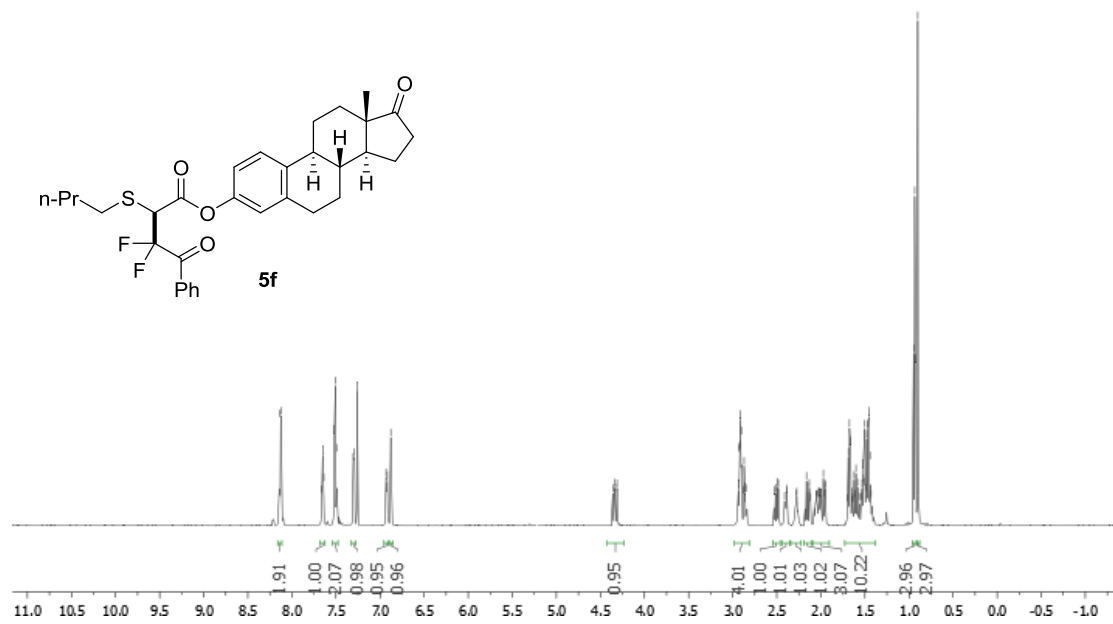

ZWZ-09-34(2z)  
13CNMR

189.01  
188.81  
188.60

166.45

148.24  
138.23  
137.92  
134.80  
130.34  
128.83  
126.55  
121.27  
118.46  
118.42  
116.67  
114.98

77.37  
77.16  
76.95  
50.43  
49.92  
49.74  
49.59  
48.01  
44.18  
38.00  
35.92  
33.01  
31.57  
31.26  
29.44  
26.34  
25.81  
21.79  
21.64  
13.87  
13.68

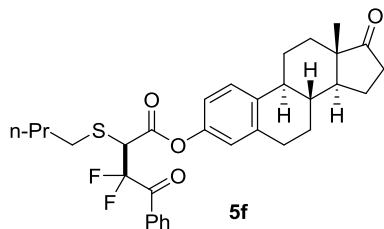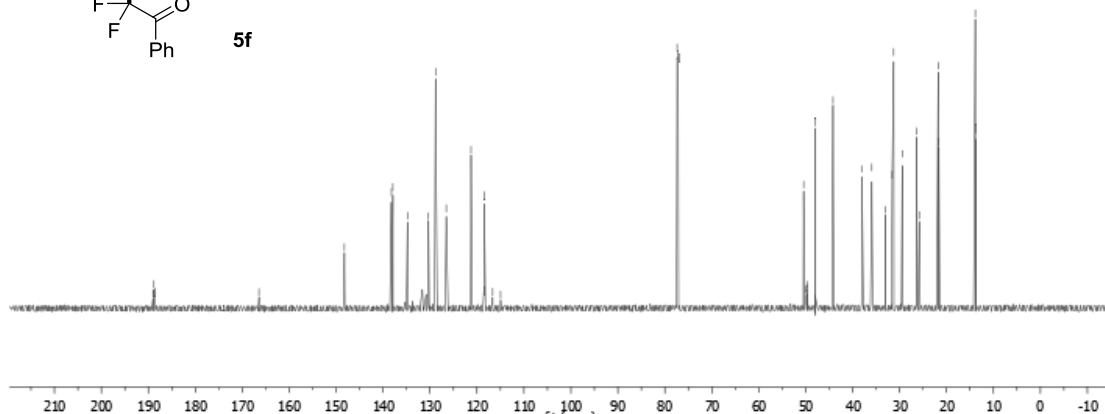

ZWZ-09-34-F  
F19CPD

99.88  
99.89  
100.41  
100.42  
102.31  
102.35  
102.84  
102.89

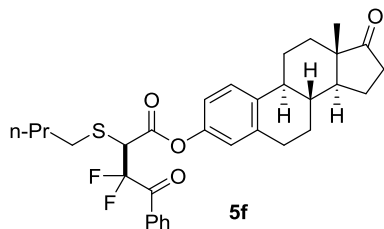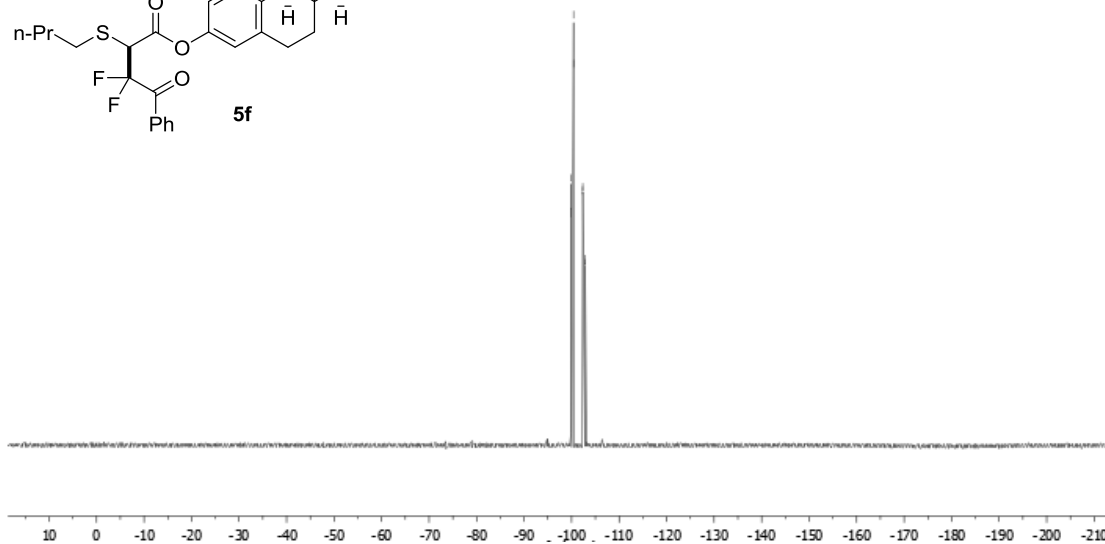

Supplement: d0qo01513j1.pdf [file d0qo01513j1.pdf]
